# Supplementary material
Source: publisher figshare collection journal article supplement (https://acs.figshare.com/ndownloader/files/10210287)
Supplement: Supplementary file 1 [file 10210287]

data_renata01
_audit_creation_date              2017-04-12
_audit_creation_method
;
Olex2 1.2-beta
(compiled 2017.03.28 svn.r3405 for OlexSys, GUI svn.r5335)
;
_shelx_SHELXL_version_number      '2016/6'
_publ_contact_author_address      ?
_publ_contact_author_email        ?
_publ_contact_author_id_orcid     ?
_publ_contact_author_name         ''
_publ_contact_author_phone        ?
_publ_section_references
;
Dolomanov, O.V., Bourhis, L.J., Gildea, R.J, Howard, J.A.K. & Puschmann, H.
 (2009), J. Appl. Cryst. 42, 339-341.

Sheldrick, G.M. (2015). Acta Cryst. A71, 3-8.

Sheldrick, G.M. (2015). Acta Cryst. C71, 3-8.
;
_chemical_name_common             ?
_chemical_name_systematic         ?
_chemical_formula_moiety          'C13 H15 N O3'
_chemical_formula_sum             'C13 H15 N O3'
_chemical_formula_weight          233.26
_chemical_absolute_configuration  ad
_chemical_melting_point           ?
loop_
  _atom_type_symbol
  _atom_type_description
  _atom_type_scat_dispersion_real
  _atom_type_scat_dispersion_imag
  _atom_type_scat_source
 'C' 'C' 0.0181 0.0091 'International Tables Vol C Tables 4.2.6.8 and 6.1.1.4'
 'H' 'H' 0.0000 0.0000 'International Tables Vol C Tables 4.2.6.8 and 6.1.1.4'
 'N' 'N' 0.0311 0.0180 'International Tables Vol C Tables 4.2.6.8 and 6.1.1.4'
 'O' 'O' 0.0492 0.0322 'International Tables Vol C Tables 4.2.6.8 and 6.1.1.4'

_shelx_space_group_comment
;
The symmetry employed for this shelxl refinement is uniquely defined
by the following loop, which should always be used as a source of
symmetry information in preference to the above space-group names.
They are only intended as comments.
;
_space_group_crystal_system       'orthorhombic'
_space_group_IT_number            19
_space_group_name_H-M_alt         'P 21 21 21'
_space_group_name_Hall            'P 2ac 2ab'
loop_
  _space_group_symop_operation_xyz
 'x, y, z'
 '-x+1/2, -y, z+1/2'
 '-x, y+1/2, -z+1/2'
 'x+1/2, -y+1/2, -z'

_cell_length_a                    9.3913(5)
_cell_length_b                    9.8798(5)
_cell_length_c                    12.6597(6)
_cell_angle_alpha                 90
_cell_angle_beta                  90
_cell_angle_gamma                 90
_cell_volume                      1174.62(10)
_cell_formula_units_Z             4
_cell_measurement_reflns_used     9940
_cell_measurement_temperature     100.0
_cell_measurement_theta_max       68.206
_cell_measurement_theta_min       4.476
_shelx_estimated_absorpt_T_max    0.865
_shelx_estimated_absorpt_T_min    0.851
_exptl_absorpt_coefficient_mu     0.771
_exptl_absorpt_correction_T_max   0.3188
_exptl_absorpt_correction_T_min   0.2335
_exptl_absorpt_correction_type    multi-scan
_exptl_absorpt_process_details
'SADABS-2016/2 (Bruker,2016/2) was used for absorption correction. wR2(int) was 0.0722 before and 0.0619 after correction. The Ratio of minimum to maximum transmission is 0.7324. The \l/2 correction factor is Not present.'
_exptl_absorpt_special_details    ?
_exptl_crystal_colour             Colorless
_exptl_crystal_colour_primary     Colorless
_exptl_crystal_density_diffrn     1.319
_exptl_crystal_density_meas       ?
_exptl_crystal_density_method     ?
_exptl_crystal_description        Block
_exptl_crystal_F_000              496
_exptl_crystal_size_max           0.217
_exptl_crystal_size_mid           0.206
_exptl_crystal_size_min           0.193
_exptl_transmission_factor_max    ?
_exptl_transmission_factor_min    ?
_diffrn_reflns_av_R_equivalents   0.0480
_diffrn_reflns_av_unetI/netI      0.0169
_diffrn_reflns_Laue_measured_fraction_full 1.000
_diffrn_reflns_Laue_measured_fraction_max 1.000
_diffrn_reflns_limit_h_max        11
_diffrn_reflns_limit_h_min        -11
_diffrn_reflns_limit_k_max        11
_diffrn_reflns_limit_k_min        -11
_diffrn_reflns_limit_l_max        15
_diffrn_reflns_limit_l_min        -15
_diffrn_reflns_number             26865
_diffrn_reflns_point_group_measured_fraction_full 1.000
_diffrn_reflns_point_group_measured_fraction_max 1.000
_diffrn_reflns_theta_full         68.000
_diffrn_reflns_theta_max          68.280
_diffrn_reflns_theta_min          5.680
_diffrn_ambient_temperature       100.0
_diffrn_detector                  'Bruker Platinum135 CCD'
_diffrn_detector_area_resol_mean  7.9
_diffrn_detector_type             'CCD Area Detector'
_diffrn_measured_fraction_theta_full 1.000
_diffrn_measured_fraction_theta_max 1.000
_diffrn_measurement_device        'Fixed Chi Three-Circle Diffractometer'
_diffrn_measurement_device_type   'Bruker D8 Platinum135'
_diffrn_measurement_method        '\f and \w scans'
_diffrn_radiation_monochromator   'Double Bounce Multilayer Mirrors'
_diffrn_radiation_probe           X-ray
_diffrn_radiation_type            CuK\a
_diffrn_radiation_wavelength      1.54178
_diffrn_radiation_xray_symbol     K-L~3~
_diffrn_source                    'Micro Focus Rotating Anode'
_diffrn_source_type               'Rigaku MicroMax-007HF'
_diffrn_standards_number          0
_reflns_Friedel_coverage          0.712
_reflns_Friedel_fraction_full     1.000
_reflns_Friedel_fraction_max      1.000
_reflns_number_gt                 2151
_reflns_number_total              2160
_reflns_special_details
;
 Reflections were merged by SHELXL according to the crystal
 class for the calculation of statistics and refinement.
 
 _reflns_Friedel_fraction is defined as the number of unique
 Friedel pairs measured divided by the number that would be
 possible theoretically, ignoring centric projections and
 systematic absences.
;
_reflns_threshold_expression      'I > 2\s(I)'
_computing_cell_refinement        'SAINT V8.38A (Bruker, 2017)'
_computing_data_collection        'APEX3 v2016.9-0 (Bruker, 2016)'
_computing_data_reduction         'SAINT V8.38A (Bruker, 2017)'
_computing_molecular_graphics     'Olex2 (Dolomanov et al., 2009)'
_computing_publication_material   'Olex2 (Dolomanov et al., 2009)'
_computing_structure_refinement   'ShelXL (Sheldrick, 2015)'
_computing_structure_solution     'ShelXT (Sheldrick, 2015)'
_refine_diff_density_max          0.127
_refine_diff_density_min          -0.202
_refine_diff_density_rms          0.042
_refine_ls_abs_structure_details
;
 Flack x determined using 891 quotients [(I+)-(I-)]/[(I+)+(I-)]
 (Parsons, Flack and Wagner, Acta Cryst. B69 (2013) 249-259).
;
_refine_ls_abs_structure_Flack    -0.04(4)
_refine_ls_extinction_coef        .
_refine_ls_extinction_method      none
_refine_ls_goodness_of_fit_ref    1.099
_refine_ls_hydrogen_treatment     mixed
_refine_ls_matrix_type            full
_refine_ls_number_parameters      159
_refine_ls_number_reflns          2160
_refine_ls_number_restraints      1
_refine_ls_R_factor_all           0.0269
_refine_ls_R_factor_gt            0.0268
_refine_ls_restrained_S_all       1.101
_refine_ls_shift/su_max           0.000
_refine_ls_shift/su_mean          0.000
_refine_ls_structure_factor_coef  Fsqd
_refine_ls_weighting_details
'w=1/[\s^2^(Fo^2^)+(0.0338P)^2^+0.1946P] where P=(Fo^2^+2Fc^2^)/3'
_refine_ls_weighting_scheme       calc
_refine_ls_wR_factor_gt           0.0674
_refine_ls_wR_factor_ref          0.0674
_refine_special_details           ?
_olex2_refinement_description
;
1. Fixed Uiso
 At 1.2 times of:
  All C(H) groups, All C(H,H) groups
 At 1.5 times of:
  All C(H,H,H) groups
2. Restrained distances
 N1-H1
 0.95 with sigma of 0.02
3.a Ternary CH refined with riding coordinates:
 C2(H2), C4(H4)
3.b Secondary CH2 refined with riding coordinates:
 C3(H3A,H3B), C5(H5A,H5B)
3.c Aromatic/amide H refined with riding coordinates:
 C9(H9), C10(H10), C11(H11), C12(H12), C13(H13)
3.d Idealised Me refined as rotating group:
 C6(H6A,H6B,H6C)
;
_atom_sites_solution_hydrogens    mixed
_atom_sites_solution_primary      dual
_atom_sites_solution_secondary    ?
loop_
  _atom_site_label
  _atom_site_type_symbol
  _atom_site_fract_x
  _atom_site_fract_y
  _atom_site_fract_z
  _atom_site_U_iso_or_equiv
  _atom_site_adp_type
  _atom_site_occupancy
  _atom_site_site_symmetry_order
  _atom_site_calc_flag
  _atom_site_refinement_flags_posn
  _atom_site_refinement_flags_adp
  _atom_site_refinement_flags_occupancy
  _atom_site_disorder_assembly
  _atom_site_disorder_group
 O1 O 0.64550(13) -0.01919(11) 0.70598(9) 0.0289(3) Uani 1 1 d . . . . .
 O2 O 0.65406(14) -0.00388(12) 0.53323(9) 0.0363(3) Uani 1 1 d . . . . .
 O3 O 0.85697(11) 0.26623(12) 0.44312(9) 0.0284(3) Uani 1 1 d . . . . .
 N1 N 0.64865(14) 0.27655(13) 0.53402(10) 0.0234(3) Uani 1 1 d D . . . .
 H1 H 0.5550(17) 0.2895(18) 0.5266(14) 0.020(4) Uiso 1 1 d D . . . .
 C1 C 0.66045(17) 0.05328(16) 0.61674(13) 0.0255(3) Uani 1 1 d . . . . .
 C2 C 0.69729(16) 0.20380(16) 0.62625(12) 0.0227(3) Uani 1 1 d . . . . .
 H2 H 0.803498 0.210853 0.627599 0.027 Uiso 1 1 calc R . . . .
 C3 C 0.64238(16) 0.26829(15) 0.72755(12) 0.0232(3) Uani 1 1 d . . . . .
 H3A H 0.682417 0.360474 0.735120 0.028 Uiso 1 1 calc R . . . .
 H3B H 0.537337 0.275838 0.724660 0.028 Uiso 1 1 calc R . . . .
 C4 C 0.68563(17) 0.18225(16) 0.82146(12) 0.0256(4) Uani 1 1 d . . . . .
 H4 H 0.791668 0.173117 0.822181 0.031 Uiso 1 1 calc R . . . .
 C5 C 0.62011(19) 0.04345(16) 0.80874(13) 0.0283(4) Uani 1 1 d . . . . .
 H5A H 0.658622 -0.016685 0.864390 0.034 Uiso 1 1 calc R . . . .
 H5B H 0.516074 0.050788 0.819961 0.034 Uiso 1 1 calc R . . . .
 C6 C 0.6377(2) 0.24529(18) 0.92496(13) 0.0349(4) Uani 1 1 d . . . . .
 H6A H 0.680083 0.335424 0.932269 0.052 Uiso 1 1 calc GR . . . .
 H6B H 0.668296 0.188017 0.983936 0.052 Uiso 1 1 calc GR . . . .
 H6C H 0.533624 0.253085 0.925451 0.052 Uiso 1 1 calc GR . . . .
 C7 C 0.73155(16) 0.30246(16) 0.44981(12) 0.0215(3) Uani 1 1 d . . . . .
 C8 C 0.66217(16) 0.38145(15) 0.36286(12) 0.0217(3) Uani 1 1 d . . . . .
 C9 C 0.70245(19) 0.35695(17) 0.25885(12) 0.0272(4) Uani 1 1 d . . . . .
 H9 H 0.773760 0.291632 0.243557 0.033 Uiso 1 1 calc R . . . .
 C10 C 0.6378(2) 0.42858(18) 0.17746(13) 0.0350(4) Uani 1 1 d . . . . .
 H10 H 0.663557 0.410226 0.106325 0.042 Uiso 1 1 calc R . . . .
 C11 C 0.53624(19) 0.52637(18) 0.19889(15) 0.0357(4) Uani 1 1 d . . . . .
 H11 H 0.492550 0.574655 0.142673 0.043 Uiso 1 1 calc R . . . .
 C12 C 0.49856(19) 0.55360(18) 0.30233(15) 0.0340(4) Uani 1 1 d . . . . .
 H12 H 0.430683 0.622223 0.317432 0.041 Uiso 1 1 calc R . . . .
 C13 C 0.56012(17) 0.48044(18) 0.38405(14) 0.0277(4) Uani 1 1 d . . . . .
 H13 H 0.532556 0.497911 0.454958 0.033 Uiso 1 1 calc R . . . .

loop_
  _atom_site_aniso_label
  _atom_site_aniso_U_11
  _atom_site_aniso_U_22
  _atom_site_aniso_U_33
  _atom_site_aniso_U_23
  _atom_site_aniso_U_13
  _atom_site_aniso_U_12
 O1 0.0389(6) 0.0208(5) 0.0271(6) -0.0002(4) 0.0012(5) -0.0012(5)
 O2 0.0463(7) 0.0330(6) 0.0295(6) -0.0071(5) 0.0012(6) -0.0007(6)
 O3 0.0184(6) 0.0371(6) 0.0298(6) 0.0029(5) 0.0014(4) 0.0043(5)
 N1 0.0170(6) 0.0297(7) 0.0234(6) 0.0047(5) 0.0001(5) 0.0024(5)
 C1 0.0239(7) 0.0266(8) 0.0260(8) -0.0008(6) 0.0001(6) 0.0022(6)
 C2 0.0204(7) 0.0245(7) 0.0231(7) 0.0030(6) -0.0006(6) -0.0006(6)
 C3 0.0243(8) 0.0205(7) 0.0249(7) 0.0005(6) 0.0002(6) -0.0003(6)
 C4 0.0277(8) 0.0243(8) 0.0247(8) 0.0015(6) -0.0018(6) 0.0009(6)
 C5 0.0367(9) 0.0241(8) 0.0241(8) 0.0014(6) 0.0021(7) -0.0006(7)
 C6 0.0512(11) 0.0284(8) 0.0250(8) -0.0002(6) 0.0009(8) -0.0005(9)
 C7 0.0193(7) 0.0219(7) 0.0232(8) -0.0025(6) -0.0003(6) -0.0017(6)
 C8 0.0208(7) 0.0216(7) 0.0227(7) 0.0012(6) -0.0015(6) -0.0045(6)
 C9 0.0323(9) 0.0224(8) 0.0270(8) -0.0021(6) 0.0011(7) -0.0054(6)
 C10 0.0514(11) 0.0333(9) 0.0203(8) 0.0016(7) -0.0054(8) -0.0142(9)
 C11 0.0386(10) 0.0312(9) 0.0373(10) 0.0120(8) -0.0138(8) -0.0098(7)
 C12 0.0266(8) 0.0314(9) 0.0439(10) 0.0108(8) -0.0031(8) 0.0012(7)
 C13 0.0238(7) 0.0296(8) 0.0298(8) 0.0039(7) 0.0003(7) 0.0009(6)

_geom_special_details
;
 All esds (except the esd in the dihedral angle between two l.s. planes)
 are estimated using the full covariance matrix.  The cell esds are taken
 into account individually in the estimation of esds in distances, angles
 and torsion angles; correlations between esds in cell parameters are only
 used when they are defined by crystal symmetry.  An approximate (isotropic)
 treatment of cell esds is used for estimating esds involving l.s. planes.
;
loop_
  _geom_bond_atom_site_label_1
  _geom_bond_atom_site_label_2
  _geom_bond_distance
  _geom_bond_site_symmetry_2
  _geom_bond_publ_flag
 O1 C1 1.3448(19) . ?
 O1 C5 1.4603(19) . ?
 O2 C1 1.200(2) . ?
 O3 C7 1.2340(19) . ?
 N1 H1 0.894(16) . ?
 N1 C2 1.4453(19) . ?
 N1 C7 1.345(2) . ?
 C1 C2 1.532(2) . ?
 C2 H2 1.0000 . ?
 C2 C3 1.522(2) . ?
 C3 H3A 0.9900 . ?
 C3 H3B 0.9900 . ?
 C3 C4 1.517(2) . ?
 C4 H4 1.0000 . ?
 C4 C5 1.512(2) . ?
 C4 C6 1.519(2) . ?
 C5 H5A 0.9900 . ?
 C5 H5B 0.9900 . ?
 C6 H6A 0.9800 . ?
 C6 H6B 0.9800 . ?
 C6 H6C 0.9800 . ?
 C7 C8 1.498(2) . ?
 C8 C9 1.391(2) . ?
 C8 C13 1.395(2) . ?
 C9 H9 0.9500 . ?
 C9 C10 1.390(2) . ?
 C10 H10 0.9500 . ?
 C10 C11 1.384(3) . ?
 C11 H11 0.9500 . ?
 C11 C12 1.383(3) . ?
 C12 H12 0.9500 . ?
 C12 C13 1.388(2) . ?
 C13 H13 0.9500 . ?

loop_
  _geom_angle_atom_site_label_1
  _geom_angle_atom_site_label_2
  _geom_angle_atom_site_label_3
  _geom_angle
  _geom_angle_site_symmetry_1
  _geom_angle_site_symmetry_3
  _geom_angle_publ_flag
 C1 O1 C5 122.67(12) . . ?
 C2 N1 H1 117.8(12) . . ?
 C7 N1 H1 117.3(11) . . ?
 C7 N1 C2 123.52(13) . . ?
 O1 C1 C2 118.32(14) . . ?
 O2 C1 O1 118.97(14) . . ?
 O2 C1 C2 122.51(15) . . ?
 N1 C2 C1 110.36(13) . . ?
 N1 C2 H2 107.1 . . ?
 N1 C2 C3 111.43(12) . . ?
 C1 C2 H2 107.1 . . ?
 C3 C2 C1 113.34(13) . . ?
 C3 C2 H2 107.1 . . ?
 C2 C3 H3A 109.8 . . ?
 C2 C3 H3B 109.8 . . ?
 H3A C3 H3B 108.2 . . ?
 C4 C3 C2 109.58(12) . . ?
 C4 C3 H3A 109.8 . . ?
 C4 C3 H3B 109.8 . . ?
 C3 C4 H4 108.9 . . ?
 C3 C4 C6 111.52(13) . . ?
 C5 C4 C3 108.42(13) . . ?
 C5 C4 H4 108.9 . . ?
 C5 C4 C6 110.06(14) . . ?
 C6 C4 H4 108.9 . . ?
 O1 C5 C4 114.39(13) . . ?
 O1 C5 H5A 108.7 . . ?
 O1 C5 H5B 108.7 . . ?
 C4 C5 H5A 108.7 . . ?
 C4 C5 H5B 108.7 . . ?
 H5A C5 H5B 107.6 . . ?
 C4 C6 H6A 109.5 . . ?
 C4 C6 H6B 109.5 . . ?
 C4 C6 H6C 109.5 . . ?
 H6A C6 H6B 109.5 . . ?
 H6A C6 H6C 109.5 . . ?
 H6B C6 H6C 109.5 . . ?
 O3 C7 N1 123.50(14) . . ?
 O3 C7 C8 121.04(14) . . ?
 N1 C7 C8 115.45(13) . . ?
 C9 C8 C7 119.11(14) . . ?
 C9 C8 C13 119.39(15) . . ?
 C13 C8 C7 121.49(14) . . ?
 C8 C9 H9 120.2 . . ?
 C10 C9 C8 119.63(16) . . ?
 C10 C9 H9 120.2 . . ?
 C9 C10 H10 119.6 . . ?
 C11 C10 C9 120.74(16) . . ?
 C11 C10 H10 119.6 . . ?
 C10 C11 H11 120.1 . . ?
 C12 C11 C10 119.84(16) . . ?
 C12 C11 H11 120.1 . . ?
 C11 C12 H12 120.1 . . ?
 C11 C12 C13 119.86(17) . . ?
 C13 C12 H12 120.1 . . ?
 C8 C13 H13 119.7 . . ?
 C12 C13 C8 120.51(16) . . ?
 C12 C13 H13 119.7 . . ?

loop_
  _geom_hbond_atom_site_label_D
  _geom_hbond_atom_site_label_H
  _geom_hbond_atom_site_label_A
  _geom_hbond_distance_DH
  _geom_hbond_distance_HA
  _geom_hbond_distance_DA
  _geom_hbond_angle_DHA
  _geom_hbond_site_symmetry_A
 N1 H1 O3 0.894(16) 1.977(17) 2.7867(17) 149.9(16) 4_456

_shelx_res_file
;
TITL Renata01 in P2(1)2(1)2(1)
    renata01.res
    created by SHELXL-2016/6 at 11:56:09 on 12-Apr-2017
REM SHELXT solution in P2(1)2(1)2(1)
REM R1 0.105, Rweak 0.022, Alpha 0.001, Orientation as input
REM Flack x = -0.023 ( 0.041 ) from Parsons' quotients
REM Formula found by SHELXT: C13 N O3
CELL 1.54178 9.3913 9.8798 12.6597 90 90 90
ZERR 4 0.0005 0.0005 0.0006 0 0 0
LATT -1
SYMM 0.5-X,-Y,0.5+Z
SYMM -X,0.5+Y,0.5-Z
SYMM 0.5+X,0.5-Y,-Z
SFAC C H N O
UNIT 52 60 4 12
EQIV $1 -0.5+X,0.5-Y,1-Z
DFIX 0.95 N1 H1

L.S. 10
PLAN  20
SIZE 0.217 0.206 0.193
TEMP -173.15
HTAB N1 O3_$1
BOND $H
list 4
fmap 2
acta 136
REM <olex2.extras>
REM <HklSrc "%.\\Renata01.hkl">
REM </olex2.extras>

WGHT    0.033800    0.194600
FVAR       0.92671
O1    4    0.645501   -0.019189    0.705977    11.00000    0.03887    0.02079 =
         0.02706   -0.00018    0.00120   -0.00121
O2    4    0.654063   -0.003880    0.533227    11.00000    0.04629    0.03301 =
         0.02949   -0.00713    0.00120   -0.00074
O3    4    0.856970    0.266229    0.443120    11.00000    0.01838    0.03707 =
         0.02984    0.00287    0.00136    0.00428
N1    3    0.648647    0.276554    0.534016    11.00000    0.01704    0.02971 =
         0.02338    0.00468    0.00010    0.00241
H1    2    0.554975    0.289549    0.526619    11.00000    0.01998
C1    1    0.660446    0.053275    0.616738    11.00000    0.02386    0.02656 =
         0.02600   -0.00081    0.00008    0.00216
C2    1    0.697291    0.203797    0.626252    11.00000    0.02042    0.02445 =
         0.02315    0.00298   -0.00062   -0.00065
AFIX  13
H2    2    0.803498    0.210853    0.627599    11.00000   -1.20000
AFIX   0
C3    1    0.642382    0.268286    0.727551    11.00000    0.02429    0.02051 =
         0.02487    0.00055    0.00017   -0.00035
AFIX  23
H3A   2    0.682417    0.360474    0.735120    11.00000   -1.20000
H3B   2    0.537337    0.275838    0.724660    11.00000   -1.20000
AFIX   0
C4    1    0.685626    0.182253    0.821455    11.00000    0.02773    0.02433 =
         0.02467    0.00155   -0.00181    0.00086
AFIX  13
H4    2    0.791668    0.173117    0.822181    11.00000   -1.20000
AFIX   0
C5    1    0.620114    0.043452    0.808741    11.00000    0.03672    0.02412 =
         0.02414    0.00138    0.00205   -0.00061
AFIX  23
H5A   2    0.658622   -0.016685    0.864390    11.00000   -1.20000
H5B   2    0.516074    0.050788    0.819961    11.00000   -1.20000
AFIX   0
C6    1    0.637651    0.245288    0.924962    11.00000    0.05125    0.02841 =
         0.02504   -0.00017    0.00086   -0.00054
AFIX 137
H6A   2    0.680083    0.335424    0.932269    11.00000   -1.50000
H6B   2    0.668296    0.188017    0.983936    11.00000   -1.50000
H6C   2    0.533624    0.253085    0.925451    11.00000   -1.50000
AFIX   0
C7    1    0.731548    0.302459    0.449811    11.00000    0.01935    0.02190 =
         0.02322   -0.00246   -0.00030   -0.00170
C8    1    0.662174    0.381447    0.362858    11.00000    0.02082    0.02157 =
         0.02272    0.00121   -0.00149   -0.00451
C9    1    0.702450    0.356954    0.258855    11.00000    0.03234    0.02243 =
         0.02697   -0.00212    0.00114   -0.00544
AFIX  43
H9    2    0.773760    0.291632    0.243557    11.00000   -1.20000
AFIX   0
C10   1    0.637789    0.428576    0.177464    11.00000    0.05136    0.03327 =
         0.02030    0.00161   -0.00535   -0.01417
AFIX  43
H10   2    0.663557    0.410226    0.106325    11.00000   -1.20000
AFIX   0
C11   1    0.536242    0.526369    0.198892    11.00000    0.03858    0.03120 =
         0.03734    0.01203   -0.01377   -0.00976
AFIX  43
H11   2    0.492550    0.574655    0.142673    11.00000   -1.20000
AFIX   0
C12   1    0.498556    0.553599    0.302333    11.00000    0.02665    0.03141 =
         0.04393    0.01077   -0.00309    0.00120
AFIX  43
H12   2    0.430683    0.622223    0.317432    11.00000   -1.20000
AFIX   0
C13   1    0.560117    0.480445    0.384054    11.00000    0.02380    0.02963 =
         0.02980    0.00387    0.00028    0.00094
AFIX  43
H13   2    0.532556    0.497911    0.454958    11.00000   -1.20000
AFIX   0
HKLF 4


REM  Renata01 in P2(1)2(1)2(1)
REM R1 =  0.0268 for    2151 Fo > 4sig(Fo)  and  0.0269 for all    2160 data
REM    159 parameters refined using      1 restraints

END

WGHT      0.0338      0.1946

REM Highest difference peak  0.127,  deepest hole -0.202,  1-sigma level  0.042
Q1    1   0.9037  0.1321  0.8458  11.00000  0.05    0.13
Q2    1   0.9192  0.1814  0.7523  11.00000  0.05    0.12
Q3    1   0.9021  0.1621  0.6320  11.00000  0.05    0.12
Q4    1   0.9105  0.1793  0.4844  11.00000  0.05    0.12
Q5    1   0.8138  0.1371  0.6147  11.00000  0.05    0.11
Q6    1   0.5701  0.3733  0.7090  11.00000  0.05    0.11
Q7    1   0.4339  0.0910  0.8772  11.00000  0.05    0.11
Q8    1   0.4520  0.0741  0.8020  11.00000  0.05    0.11
Q9    1   0.4306  0.1693  0.8367  11.00000  0.05    0.10
Q10   1   0.8777  0.1213  0.6999  11.00000  0.05    0.10
Q11   1   0.3304  0.6239  0.1850  11.00000  0.05    0.10
Q12   1   0.5913 -0.1193  0.5342  11.00000  0.05    0.10
Q13   1   0.9286  0.3408  0.3572  11.00000  0.05    0.10
Q14   1   0.5996  0.4997  0.8930  11.00000  0.05    0.10
Q15   1   0.6248 -0.1401  0.8828  11.00000  0.05    0.09
Q16   1   0.5758  0.6169  0.5154  11.00000  0.05    0.09
Q17   1   0.6994 -0.1157  0.5328  11.00000  0.05    0.09
Q18   1   0.6706  0.1304  0.6226  11.00000  0.05    0.09
Q19   1   0.9452  0.1965  0.8720  11.00000  0.05    0.09
Q20   1   0.3770  0.6161  0.2864  11.00000  0.05    0.09
;
_shelx_res_checksum               38968
_shelx_hkl_file
;
   1   0   0    0.10    0.20
   1   0   0    0.30    0.10
   1   0   0    0.40    0.20
   1   0   0    0.00    0.20
  -1   0   0    0.20    0.20
  -1   0   0    0.70    0.30
  -1   0   0    0.20    0.20
  -1   0   0    0.20    0.20
   2   0   0 3809.02  164.88
  -2   0   0 3157.38  164.78
  -2   0   0 3385.36  164.98
  -2   0   0 3412.86  164.48
  -2   0   0 3309.07  166.18
  -2   0   0 3200.38  164.88
   2   0   0 3607.34  164.98
   2   0   0 3769.42  165.08
   2   0   0 3367.16  164.38
   3   0   0    0.50    0.70
   3   0   0    0.50    0.60
   3   0   0    0.30    0.50
  -3   0   0    0.70    0.60
  -3   0   0    0.20    0.30
  -3   0   0    0.60    0.50
  -4   0   0 4659.13  245.98
  -4   0   0 5043.40  246.98
   4   0   0 4491.85  246.08
   4   0   0 5622.34  248.28
  -4   0   0 4891.21  245.98
  -4   0   0 5639.44  248.18
   4   0   0 5560.84  247.88
   4   0   0 5432.36  248.28
  -5   0   0    0.80    0.80
   5   0   0    0.20    0.70
   5   0   0    0.40    0.80
  -5   0   0    0.40    0.50
   5   0   0    2.00    1.20
  -5   0   0    0.40    0.90
   6   0   0 4476.55  211.58
   6   0   0 4647.14  214.38
   6   0   0 4446.65  214.98
  -6   0   0 4284.07  211.48
   6   0   0 4440.16  214.98
  -6   0   0 4215.68  212.98
  -6   0   0 4517.45  211.18
  -8   0   0   69.79    3.90
  -8   0   0   67.09    3.80
   8   0   0   66.59    4.30
   8   0   0   69.79    4.10
   8   0   0   67.19    4.10
   8   0   0   61.89    3.90
  -8   0   0   63.99    4.20
   8   0   0   69.49    4.10
   8   0   0   67.79    4.00
  -8   0   0   63.79    3.70
  -9   0   0   -0.10    0.50
  -9   0   0    0.70    0.60
  -9   0   0   -0.20    0.60
   9   0   0    0.40    0.60
   9   0   0    0.10    0.60
   9   0   0    0.40    0.80
  -9   0   0    0.40    0.60
   9   0   0    0.40    0.70
 -10   0   0  430.66   22.50
  10   0   0  477.75   22.40
  10   0   0  475.65   22.50
 -10   0   0  463.65   22.20
 -10   0   0  439.26   21.90
  11   0   0    0.90    0.40
 -11   0   0    0.30    0.40
  11   0   0   -0.20    0.60
   0   1   0    0.90    0.30
   0   1   0    0.40    0.30
   0   1   0    0.60    0.20
   0   1   0    0.70    0.20
   0  -1   0    1.00    0.30
   1   1   0  533.25   25.60
  -1   1   0  527.25   25.10
  -1  -1   0  495.25   25.80
  -1   1   0  527.15   25.80
   1  -1   0  563.44   25.10
   1  -1   0  514.45   25.70
  -1  -1   0  573.14   25.70
  -1  -1   0  510.35   25.60
  -1   1   0  514.15   25.70
   1  -1   0  492.15   25.10
   1  -1   0  527.35   25.80
   1  -1   0  456.55   25.50
   1   1   0  534.95   25.60
   1   1   0  541.75   25.40
   1   1   0  579.84   25.90
  -1   1   0  541.65   25.60
  -1  -1   0  487.25   25.40
  -1  -1   0  497.05   25.40
  -1   1   0  515.75   25.40
  -2   1   0 6877.71  364.16
   2  -1   0 8678.63  369.96
   2   1   0 7728.73  363.26
   2   1   0 8338.67  369.06
  -2   1   0 7877.91  362.86
  -2  -1   0 7604.04  363.96
  -2   1   0 8279.87  368.06
  -2  -1   0 7322.17  363.06
   2   1   0 7448.05  367.76
   2  -1   0 6602.84  362.76
   2  -1   0 7118.99  365.86
   2  -1   0 7008.20  365.66
  -2  -1   0 7886.41  368.16
  -2  -1   0 7376.06  366.46
  -2   1   0 6951.80  362.76
   2   1   0 8826.82  370.16
   3  -1   0    0.70    0.50
   3   1   0    0.60    0.50
   3  -1   0    0.80    0.50
  -3   1   0    1.80    0.90
   3   1   0    0.40    0.30
  -3  -1   0    1.00    0.60
  -3   1   0    0.40    0.50
  -3  -1   0    0.60    0.30
   3   1   0    0.80    0.70
   3  -1   0    0.30    0.70
   3  -1   0    0.40    0.40
  -3  -1   0    0.40    0.40
   4   1   0 2398.66  110.09
   4  -1   0 2211.78  109.59
   4  -1   0 2321.87  110.59
   4  -1   0 2247.98  109.89
   4   1   0 2378.36  110.89
  -4  -1   0 2051.89  108.09
  -4   1   0 2194.88  109.29
  -4   1   0 2190.28  109.09
  -4   1   0 2295.97  110.19
   4   1   0 2316.87  110.19
  -4  -1   0 2406.26  110.39
  -4  -1   0 2189.98  109.19
  -5   1   0 1742.33   88.69
   5  -1   0 1730.03   90.69
  -5   1   0 1861.71   91.29
   5  -1   0 1886.91   91.79
   5   1   0 1891.51   91.19
  -5  -1   0 1866.91   89.99
  -5  -1   0 1863.01   88.69
   5   1   0 1830.12   90.99
   5   1   0 1909.01   91.99
  -5   1   0 1826.52   89.99
   5  -1   0 1930.81   90.69
  -5  -1   0 1889.01   91.39
  -6   1   0  105.89    8.10
  -6   1   0  101.19    5.20
  -6  -1   0   99.19    8.10
   6   1   0   91.09    5.40
   6  -1   0   97.19    8.30
  -6  -1   0  107.89    5.60
   6  -1   0   89.39    7.20
  -6  -1   0   92.09    6.70
   6   1   0   97.59    7.70
   6   1   0  121.29    8.30
  -6   1   0   85.19    6.60
  -6   1   0   96.89    5.50
   6  -1   0  102.49    5.70
  -6  -1   0   95.59    5.20
   6   1   0   94.39    8.30
   7   1   0   13.90    1.60
   7  -1   0   13.90    1.40
  -7   1   0   12.50    1.30
   7   1   0   14.80    1.40
   7   1   0   13.60    3.20
   7   1   0   13.20    1.60
  -7  -1   0   14.00    1.40
   7   1   0   13.30    1.40
  -7  -1   0   14.20    1.30
   7   1   0   12.40    1.70
  -7  -1   0   12.70    1.20
  -7   1   0   13.70    1.40
  -7  -1   0   14.90    1.70
   7  -1   0   14.40    1.80
   7   1   0   15.70    1.50
   7  -1   0   13.90    1.60
   7   1   0   14.00    1.70
   7  -1   0   13.10    1.40
  -7   1   0   13.20    1.20
  -8   1   0   18.60    1.40
   8  -1   0   17.90    1.80
   8   1   0   18.60    1.70
  -8   1   0   15.50    1.70
   8  -1   0   17.50    2.00
   8   1   0   19.40    2.00
   8  -1   0   18.90    1.90
  -8  -1   0   18.50    1.70
   8   1   0   16.70    1.80
   8   1   0   18.50    1.60
  -8  -1   0   16.90    1.80
  -8  -1   0   17.80    1.50
  -8   1   0   14.70    1.50
  -8  -1   0   19.00    1.50
   8   1   0   18.30    1.90
   9   1   0    4.00    1.00
  -9  -1   0    4.30    0.70
  -9   1   0    2.60    0.70
  -9  -1   0    4.20    0.90
   9   1   0    4.00    1.10
  -9   1   0    4.60    1.00
   9   1   0    4.80    0.90
  -9  -1   0    3.30    0.70
   9   1   0    5.50    0.90
   9   1   0    6.10    1.10
   9  -1   0    4.20    1.20
  -9   1   0    4.40    0.60
   9  -1   0    6.80    1.10
   9  -1   0    4.90    0.90
 -10  -1   0    1.20    0.60
  10   1   0    0.30    0.70
 -10  -1   0    0.20    0.80
  10   1   0   -0.20    0.60
 -10   1   0    0.40    0.50
 -10  -1   0    1.20    0.50
  10  -1   0    1.00    0.60
  10  -1   0    1.10    0.60
  10   1   0    1.20    0.50
  10  -1   0    1.30    0.80
  10   1   0    2.20    0.80
 -10   1   0    0.00    0.60
 -11  -1   0    0.30    0.50
  11  -1   0   -0.40    0.50
  11   1   0    0.10    0.40
  11   1   0    0.30    0.60
  11  -1   0    0.10    0.30
 -11   1   0    0.20    0.50
 -11   1   0   -0.20    0.40
   0  -2   0   35.60    2.80
   0   2   0   47.90    2.90
   0  -2   0   44.60    2.80
   0  -2   0   35.20    2.50
   0   2   0   42.50    3.30
   0   2   0   39.70    2.40
   0   2   0   39.60    2.80
   0   2   0   48.60    2.70
   1   2   0    1.80    0.50
  -1   2   0    2.20    0.80
  -1  -2   0    2.40    0.60
   1  -2   0    2.00    0.20
  -1  -2   0    2.00    0.80
   1  -2   0    3.80    0.80
  -1  -2   0    2.10    0.80
   1   2   0    2.30    0.70
   1   2   0    2.60    0.70
   1   2   0    2.20    0.60
   1   2   0    2.00    0.70
   2   2   0 4558.54  216.98
  -2  -2   0 4215.88  216.98
  -2   2   0 4266.57  216.88
   2  -2   0 4537.85  216.08
  -2   2   0 4334.77  216.58
  -2  -2   0 4407.36  216.98
  -2  -2   0 4886.81  217.18
  -2  -2   0 4057.69  216.48
   2   2   0 5053.99  216.58
   2  -2   0 4293.37  217.08
  -2   2   0 4592.44  216.68
  -2  -2   0 5038.90  216.78
  -2   2   0 5198.08  217.78
  -2   2   0 4457.85  216.98
   2   2   0 4098.89  217.18
  -3   2   0 1161.98   55.89
  -3   2   0 1248.48   57.29
   3  -2   0 1137.79   55.99
   3  -2   0 1243.08   57.49
  -3   2   0 1071.59   56.29
   3   2   0 1231.88   56.49
  -3   2   0  965.20   55.69
   3   2   0 1188.08   57.59
  -3  -2   0 1053.99   56.09
  -3  -2   0 1297.17   57.19
  -3   2   0 1255.17   56.99
  -3  -2   0  994.30   56.09
  -3  -2   0 1176.48   56.29
  -4  -2   0    5.90    1.30
   4   2   0    5.40    1.50
  -4   2   0    5.10    1.10
   4  -2   0    5.60    1.90
  -4   2   0    7.10    1.40
  -4   2   0    7.00    1.70
   4   2   0    6.80    2.00
   4   2   0    6.10    1.50
  -4  -2   0    6.00    0.70
  -4  -2   0    7.40    1.90
  -4   2   0    5.90    1.70
  -5  -2   0    0.60    0.90
  -5   2   0    1.10    1.00
  -5   2   0    0.30    0.90
   5   2   0    1.20    1.20
  -5  -2   0    0.30    0.30
   5  -2   0    0.90    0.50
   5   2   0    0.30    0.90
  -5  -2   0    1.60    1.10
   5   2   0    0.50    0.80
   5  -2   0    1.00    1.20
  -6  -2   0   10.60    2.70
  -6   2   0    3.20    1.70
   6   2   0    3.10    1.80
   6   2   0    2.40    1.50
  -6  -2   0    2.50    0.70
  -6  -2   0    3.30    0.60
  -6   2   0    1.80    1.40
   6  -2   0    4.00    1.00
   6  -2   0    2.30    1.70
   7  -2   0    5.50    1.00
  -7  -2   0    6.40    0.80
   7   2   0    6.30    1.20
  -7  -2   0    7.10    1.20
   7   2   0    6.80    1.10
   7   2   0    8.10    2.50
  -7   2   0    8.20    1.00
   7   2   0    8.60    1.30
   7   2   0    7.60    0.90
   7  -2   0    8.20    1.10
   7   2   0    7.80    1.30
   7  -2   0    7.90    1.10
  -7   2   0    9.00    1.30
   7   2   0    9.00    1.20
  -7   2   0    6.60    0.80
   7   2   0    8.80    1.20
  -7  -2   0    8.20    1.00
   7  -2   0    8.20    1.40
   8   2   0    0.40    0.50
   8   2   0    1.20    0.90
  -8   2   0    3.20    0.90
  -8   2   0    0.60    0.50
   8   2   0    0.10    0.80
   8   2   0    0.70    0.60
  -8  -2   0    0.60    0.50
  -8  -2   0    0.30    0.60
   8   2   0    0.50    0.80
   8  -2   0    0.30    0.70
   8  -2   0    0.20    0.80
   8   2   0    0.50    0.60
  -8  -2   0    0.50    0.60
   8  -2   0   -0.10    0.70
   9   2   0   13.30    1.60
   9   2   0   12.50    1.40
  -9  -2   0   11.20    1.60
  -9  -2   0   11.40    1.40
   9   2   0   13.80    1.70
  -9   2   0   13.40    1.30
  -9  -2   0   12.40    1.40
  -9  -2   0   11.60    1.20
  -9   2   0   13.40    1.50
   9  -2   0   13.70    1.70
   9  -2   0   13.60    1.60
   9   2   0   12.40    1.30
   9  -2   0   11.50    1.30
   9   2   0   12.20    1.60
   9   2   0   11.30    1.40
  10  -2   0    0.10    0.50
  10   2   0    0.60    0.70
  10  -2   0    0.10    0.40
  10   2   0    0.30    0.50
 -10  -2   0    0.80    0.40
 -10   2   0    0.90    0.60
  10   2   0    1.70    0.60
  10  -2   0    0.60    0.60
 -10   2   0    1.00    0.40
 -10  -2   0    0.50    0.50
 -10  -2   0    0.00    0.60
  11  -2   0   52.79    2.80
 -11   2   0   50.39    2.90
 -11  -2   0   48.80    2.60
  11   2   0   51.09    2.90
 -11  -2   0   52.49    2.90
   0  -3   0    1.60    0.60
   0   3   0    1.40    0.40
   0  -3   0    0.40    0.60
   1   3   0 3596.04  173.08
   1   3   0 3108.59  172.58
  -1   3   0 3847.01  173.08
   1   3   0 3647.03  172.48
  -1   3   0 3898.51  172.88
  -1  -3   0 3479.35  172.38
   1   3   0 3750.92  173.08
  -1  -3   0 3036.90  172.38
  -1  -3   0 3703.53  173.78
  -1   3   0 3622.04  173.98
   1  -3   0 3963.40  173.18
  -2  -3   0   83.49    5.80
   2  -3   0   92.99    6.30
  -2  -3   0   97.29    6.30
   2   3   0   98.19    6.60
   2   3   0   97.29    6.00
   2   3   0   90.99    5.60
  -2   3   0  105.99    7.10
  -2   3   0   89.59    5.90
  -2   3   0   92.59    6.20
  -2  -3   0   90.99    6.50
  -3  -3   0    0.50    0.70
  -3   3   0    0.40    0.70
   3   3   0    0.90    0.60
  -3   3   0    0.70    0.80
  -3  -3   0    1.00    0.60
   3  -3   0    0.50    0.30
   3   3   0   -0.60    1.00
  -3  -3   0    0.50    0.60
  -3   3   0    0.20    0.60
   3  -3   0    0.90    1.00
   3   3   0    0.30    0.80
   4  -3   0    3.00    1.70
  -4  -3   0    2.20    0.40
  -4   3   0    2.00    1.20
  -4  -3   0    2.20    1.20
  -4  -3   0    1.90    0.90
   4  -3   0    2.90    1.30
   4   3   0    3.50    1.10
   4   3   0    2.50    1.60
   4   3   0    2.10    1.40
  -4   3   0    2.30    1.20
   4  -3   0    1.60    0.60
  -5  -3   0 1947.31   94.69
  -5  -3   0 1938.81   97.89
  -5   3   0 2087.39   97.09
   5  -3   0 1746.33   98.19
   5  -3   0 2076.09   95.19
   5  -3   0 1822.22   94.59
   5   3   0 2172.38   98.29
   5   3   0 2059.99   99.29
  -5  -3   0 2038.60   96.69
  -5   3   0 1933.51   97.79
   6   3   0   65.79    3.60
  -6   3   0   56.69    3.70
   6   3   0   56.09    3.50
   6   3   0   54.69    3.50
   6   3   0   56.59    3.50
   6   3   0   57.09    3.50
  -6   3   0   55.59    5.10
  -6   3   0   58.09    3.40
   6   3   0   68.19    6.20
   6  -3   0   54.89    3.70
  -6  -3   0   55.69    3.50
   6  -3   0   64.39    3.90
  -6  -3   0   56.29    3.20
   6  -3   0   54.39    3.50
   6   3   0   53.19    3.50
  -7   3   0   52.99    3.50
   7   3   0   47.20    5.80
   7   3   0   51.59    3.50
   7   3   0   51.69    3.30
   7  -3   0   56.39    3.30
   7   3   0   48.90    3.00
  -7  -3   0   49.30    3.10
   7  -3   0   50.89    3.30
   7   3   0   50.89    3.30
  -7   3   0   52.79    3.10
   7   3   0   50.89    3.40
   7   3   0   51.09    3.30
  -7  -3   0   46.70    3.30
   7  -3   0   54.39    3.80
   8   3   0    5.50    1.10
  -8  -3   0    4.60    0.70
   8  -3   0    4.00    1.10
   8   3   0    6.20    1.10
   8   3   0    5.20    1.10
  -8   3   0    4.90    1.00
   8  -3   0    5.60    1.00
   8  -3   0    4.10    0.80
  -8  -3   0    4.30    0.90
   8   3   0    5.30    1.10
  -8   3   0    5.00    0.80
   8   3   0    3.70    1.10
   8  -3   0    5.00    1.30
  -8  -3   0    5.50    1.10
  -9  -3   0  283.17   14.00
  -9   3   0  299.57   14.50
  -9  -3   0  278.57   14.60
   9   3   0  272.67   14.30
  -9  -3   0  292.27   13.90
   9   3   0  310.67   14.40
   9  -3   0  251.57   14.20
   9   3   0  263.27   14.30
   9   3   0  273.87   14.30
  -9   3   0  288.37   14.10
  -9  -3   0  286.77   14.20
   9  -3   0  295.67   14.70
   9   3   0  290.77   14.30
 -10   3   0   17.60    1.30
  10   3   0   16.80    1.50
  10   3   0   17.10    1.50
 -10  -3   0   17.00    1.30
  10   3   0   16.80    1.40
 -10  -3   0   16.40    1.40
 -10  -3   0   18.50    1.50
  10   3   0   16.00    1.40
  10   3   0   16.90    1.60
  10  -3   0   14.50    1.50
  10  -3   0   16.10    1.40
 -10   3   0   15.80    1.40
   0   4   0 7722.73  413.06
   0  -4   0 8538.35  413.16
   0  -4   0 9278.17  415.06
   0   4   0 9040.70  413.66
   0   4   0 8389.66  412.66
   0   4   0 8958.50  412.16
  -1   4   0  247.58   13.40
   1   4   0  225.98   13.00
  -1  -4   0  245.78   12.80
  -1   4   0  199.28   12.90
   1   4   0  223.98   12.50
   1   4   0  222.58   13.20
   1   4   0  220.88   13.30
   1  -4   0  252.47   14.70
   1  -4   0  271.07   13.50
  -1  -4   0  259.57   14.60
  -2  -4   0   92.29    5.60
  -2  -4   0   88.59    6.10
   2  -4   0   85.59    4.70
  -2   4   0   92.49    6.30
  -2  -4   0   88.49    7.00
   2  -4   0   88.79    6.50
   2  -4   0   95.59    7.50
  -2   4   0   95.89    6.50
   2   4   0   95.19    6.80
   2   4   0   89.29    6.00
  -3   4   0  514.95   27.00
   3   4   0  499.35   26.60
  -3  -4   0  499.15   26.30
   3   4   0  450.65   25.60
   3   4   0  535.75   27.80
  -3  -4   0  511.25   27.10
  -3  -4   0  513.15   27.40
   3  -4   0  504.45   24.70
   3  -4   0  486.45   27.80
   3  -4   0  550.34   27.50
  -3   4   0  521.05   26.50
  -4   4   0 1489.45   73.99
  -4  -4   0 1519.65   73.09
  -4  -4   0 1371.06   70.69
   4   4   0 1463.05   73.69
  -4  -4   0 1371.66   73.79
  -4   4   0 1582.84   73.39
   4   4   0 1593.74   75.39
   4  -4   0 1470.25   71.39
   4  -4   0 1430.46   74.69
   4  -4   0 1541.15   71.19
   4  -4   0 1446.86   70.89
   4  -4   0 1517.35   74.69
  -5  -4   0   46.90    4.50
   5  -4   0   47.20    2.80
   5  -4   0   44.10    5.60
   5   4   0   42.30    5.50
   5   4   0   45.40    5.10
   5  -4   0   46.10    3.30
  -5  -4   0   49.60    2.80
  -5   4   0   44.20    5.20
  -5   4   0   44.70    4.60
  -5  -4   0   48.80    5.50
   5  -4   0   45.90    3.10
   6   4   0  294.67   15.00
   6   4   0  288.07   15.10
   6  -4   0  311.67   15.70
   6   4   0  283.57   15.30
  -6   4   0  299.27   15.00
  -6  -4   0  326.87   15.30
   6   4   0  319.17   15.30
   6   4   0  308.47   15.30
  -6   4   0  300.67   15.30
  -6  -4   0  300.37   14.90
   6   4   0  299.27   15.40
   6   4   0  301.97   18.80
   6  -4   0  305.87   15.20
   7   4   0   38.10    2.70
   7  -4   0   34.20    2.40
  -7   4   0   32.70    2.30
  -7  -4   0   32.90    2.60
   7   4   0   35.80    2.50
  -7   4   0   33.60    2.60
  -7  -4   0   35.20    2.30
   7  -4   0   33.30    2.60
   7  -4   0   31.80    2.80
   7   4   0   32.20    2.50
   7   4   0   32.60    2.20
   7   4   0   32.80    2.60
   7   4   0   35.60    2.60
  -8  -4   0  209.38   10.70
   8   4   0  208.88   10.60
  -8  -4   0  188.68   10.00
  -8   4   0  201.48   10.60
   8   4   0  200.48   10.50
  -8   4   0  199.88   10.20
   8   4   0  192.38   10.10
   8   4   0  207.08   10.50
   8   4   0  203.48   10.50
   8   4   0  194.58   10.50
   8  -4   0  191.28   10.80
   8  -4   0  211.78   10.50
  -8  -4   0  209.18   10.30
   8  -4   0  201.48   10.40
   9   4   0   75.89    4.30
   9   4   0   70.99    4.10
   9  -4   0   72.59    4.10
   9  -4   0   66.99    4.00
   9   4   0   71.29    4.20
   9   4   0   61.49    4.10
   9   4   0   75.29    4.30
  -9  -4   0   72.89    4.00
  -9   4   0   73.79    4.00
  -9   4   0   68.39    4.10
  -9  -4   0   74.09    3.80
  -9  -4   0   67.89    4.30
  -9  -4   0   67.99    3.90
   9  -4   0   72.49    4.50
  10   4   0  343.57   16.70
 -10  -4   0  362.56   16.40
 -10  -4   0  302.67   16.50
  10  -4   0  350.46   16.60
  10   4   0  351.76   16.70
  10   4   0  322.17   16.60
  10  -4   0  321.07   16.90
  10   4   0  343.57   16.60
  10   4   0  350.46   16.70
 -10   4   0  334.77   16.60
   0   5   0    0.30    0.70
   0  -5   0    0.20    0.80
   0   5   0    1.30    1.10
   0  -5   0    1.00    0.70
   1   5   0  647.64   33.50
  -1  -5   0  546.45   32.20
  -1   5   0  686.63   33.60
   1  -5   0  616.24   30.90
  -1   5   0  656.43   33.20
   1  -5   0  641.44   33.30
   1   5   0  672.43   33.20
  -1  -5   0  696.63   35.40
   1  -5   0  712.23   35.50
   1   5   0  616.54   32.90
   1   5   0  604.34   32.10
   2  -5   0  134.19    7.20
  -2   5   0  152.08    9.30
   2   5   0  136.79    8.70
  -2  -5   0  149.49    9.30
   2  -5   0  133.79    9.40
  -2   5   0  147.29    7.80
  -2  -5   0  132.39   10.20
   2  -5   0  147.59   10.90
  -2   5   0  148.59    9.60
   2   5   0  138.19    9.60
   3   5   0   44.40    5.50
  -3   5   0   49.50    5.20
   3  -5   0   68.49    6.80
  -3  -5   0   59.89    5.60
  -3  -5   0   58.09    5.90
   3  -5   0   60.19    3.30
   3   5   0   64.09    5.30
  -3   5   0   76.09    5.70
   3  -5   0   56.59    5.70
  -3  -5   0   67.49    5.30
   3  -5   0   59.49    3.50
   3  -5   0   53.99    3.60
  -4  -5   0  109.09    8.00
  -4   5   0  108.89    8.60
   4  -5   0  118.59    6.00
   4   5   0  103.79    9.20
  -4  -5   0  106.29    8.80
  -4   5   0  120.79    8.30
   4  -5   0  117.59    6.40
   4   5   0  115.99    8.40
   4  -5   0  120.59    6.20
   4  -5   0  111.49    9.20
   4  -5   0   99.39    9.20
  -4   5   0  110.49    6.20
   5  -5   0  915.21   43.90
  -5   5   0  906.51   43.30
  -5   5   0  820.52   43.10
  -5   5   0  851.51   43.30
  -5  -5   0  938.11   43.20
  -5   5   0  897.21   46.30
   5   5   0  906.61   43.60
   5   5   0  839.62   43.20
  -5   5   0  916.11   43.50
   5  -5   0  877.91   43.40
   5   5   0  900.71   43.50
   5  -5   0  916.71   43.60
   5   5   0  953.90   47.10
  -5  -5   0  884.71   45.90
   5   5   0  860.11   43.50
   5   5   0  907.41   43.60
   5  -5   0  959.50   43.30
  -5   5   0  901.51   43.60
   6   5   0  276.07   13.80
   6   5   0  230.98   16.80
   6  -5   0  287.17   14.30
  -6   5   0  253.57   13.90
   6  -5   0  259.27   13.50
   6   5   0  282.17   13.90
   6   5   0  264.67   13.90
   6   5   0  286.27   14.00
   6   5   0  272.67   13.70
  -6   5   0  280.17   13.90
  -6  -5   0  300.57   13.80
   6  -5   0  279.77   13.80
   6   5   0  254.47   13.50
  -6   5   0  262.97   13.60
   7  -5   0   94.49    6.50
  -7  -5   0  117.79    6.30
   7   5   0  117.39    6.40
   7  -5   0  117.09    6.30
   7  -5   0  104.39    5.60
  -7   5   0  118.19    6.10
   7   5   0  109.19    6.20
   7   5   0  120.29    6.40
   7  -5   0  108.59    6.20
   7   5   0  106.79    6.40
   7   5   0  114.49    6.30
  -7  -5   0  112.59    6.00
   7   5   0  108.59    5.90
  -7   5   0  119.79    6.30
   8   5   0    7.60    1.30
   8   5   0    9.00    1.00
   8   5   0    9.50    1.40
  -8   5   0   10.40    1.30
   8   5   0   10.10    1.30
   8  -5   0   10.80    1.40
   8  -5   0   11.40    1.30
   8   5   0   10.90    1.50
  -8  -5   0    9.80    1.10
  -8  -5   0    9.50    1.40
  -8   5   0   11.10    1.20
   8   5   0   10.50    1.30
   8  -5   0    8.60    1.60
  -9  -5   0   82.19    4.10
  -9   5   0   79.39    4.20
   9   5   0   78.79    4.30
  -9  -5   0   71.89    4.10
   9   5   0   82.09    4.50
  -9  -5   0   85.29    4.30
   9   5   0   73.49    4.40
   9  -5   0   81.39    4.80
   9   5   0   76.39    4.50
   9   5   0   81.49    4.50
   9  -5   0   75.19    4.30
  -9   5   0   64.59    4.30
  -9  -5   0   75.29    4.60
   9  -5   0   81.69    4.40
 -10   5   0    5.10    0.60
  10  -5   0    5.70    0.80
  10   5   0    3.90    0.70
  10   5   0    6.80    0.90
 -10  -5   0    5.10    0.60
  10   5   0    5.10    0.70
  10   5   0    5.70    0.80
 -10   5   0    5.20    0.70
  10   5   0    6.60    0.90
   0   6   0   20.30    2.90
   0   6   0   20.00    1.70
   0  -6   0   20.90    3.90
   0   6   0   18.00    2.90
   1   6   0  233.98   13.50
  -1   6   0  210.38   11.10
  -1   6   0  218.88   13.60
   1  -6   0  227.48   15.70
  -1   6   0  222.18   13.30
   1   6   0  209.68   13.50
   1   6   0  201.98   11.00
  -1  -6   0  205.58   15.00
   1  -6   0  211.48   13.20
   1  -6   0  215.48   10.70
  -2  -6   0   59.49    5.90
  -2  -6   0   68.19    5.80
   2  -6   0   63.19    3.50
   2  -6   0   58.49    5.60
  -2   6   0   51.59    5.60
   2  -6   0   58.69    3.30
  -2   6   0   76.29    6.00
   2   6   0   57.09    3.60
  -2  -6   0   52.79    6.50
   3  -6   0   32.50    5.80
   3   6   0   40.60    5.00
  -3  -6   0   43.40    4.50
   3  -6   0   40.80    2.90
   3  -6   0   42.90    2.80
  -3   6   0   39.30    4.60
  -3  -6   0   36.40    4.70
  -3   6   0   42.50    2.90
   3   6   0   34.90    4.20
   3  -6   0   44.70    2.60
  -3   6   0   57.09    5.50
   3  -6   0   38.40    4.90
   4  -6   0  299.57   13.70
   4   6   0  273.87   13.60
   4   6   0  234.18   13.10
   4  -6   0  283.17   13.40
  -4  -6   0  258.97   15.90
  -4   6   0  252.67   13.20
  -4   6   0  275.87   13.40
   4  -6   0  290.67   14.00
  -4   6   0  274.97   13.70
   4   6   0  253.57   13.50
  -4   6   0  256.17   13.30
  -4   6   0  269.07   16.30
  -4   6   0  284.97   13.80
   4   6   0  260.27   16.20
   4   6   0  236.98   13.30
  -4   6   0  264.37   13.50
   4   6   0  265.67   13.50
   4   6   0  260.97   13.30
  -4   6   0  269.87   13.30
   5   6   0  323.97   16.20
  -5   6   0  326.67   16.40
  -5  -6   0  326.07   16.00
  -5   6   0  331.07   16.30
   5  -6   0  341.17   16.70
   5   6   0  331.17   16.30
  -5   6   0  311.97   16.00
   5   6   0  325.57   16.30
   5   6   0  332.07   16.30
  -5   6   0  325.47   16.10
   5  -6   0  308.87   16.10
   5  -6   0  335.27   16.40
   5  -6   0  343.87   16.10
  -5   6   0  278.57   18.70
   5   6   0  322.37   16.00
   5   6   0  290.27   19.30
  -5   6   0  322.87   16.40
  -5   6   0  316.97   16.00
  -6  -6   0   70.79    4.10
   6  -6   0   70.69    4.60
  -6   6   0   70.29    3.90
   6  -6   0   68.29    4.10
   6   6   0   74.29    4.40
   6   6   0   69.49    3.90
   6   6   0   64.19    4.30
   6  -6   0   67.29    4.00
  -6   6   0   70.89    4.00
  -6   6   0   74.89    4.00
   6   6   0   66.39    4.10
   6   6   0   66.49    4.40
  -6   6   0   71.89    4.30
  -7   6   0    9.40    1.30
  -7   6   0    6.90    1.00
   7  -6   0    8.10    0.80
   7   6   0   10.20    1.30
   7   6   0    6.10    1.00
   7   6   0    7.60    1.20
   7  -6   0    6.40    1.50
   7   6   0    5.20    0.90
   7  -6   0    8.20    1.20
   7  -6   0    7.80    1.10
  -7  -6   0    8.00    1.10
   7   6   0    7.00    1.20
  -7  -6   0    9.30    1.30
   7   6   0    7.10    1.20
   8  -6   0  247.68   12.00
   8   6   0  224.08   11.70
  -8  -6   0  241.38   12.20
   8   6   0  239.08   12.10
   8  -6   0  239.18   12.00
   8   6   0  230.68   11.90
   8   6   0  210.38   12.00
  -8  -6   0  248.88   11.90
   8  -6   0  251.67   12.50
  -8   6   0  255.67   11.90
  -8   6   0  238.28   12.00
   8   6   0  208.58   12.10
   8   6   0  245.08   12.10
   9  -6   0    0.90    0.70
  -9   6   0    1.50    0.70
   9   6   0    2.20    0.60
  -9  -6   0    2.10    0.50
   9  -6   0    2.00    0.60
   9   6   0    1.20    0.50
   9  -6   0    2.70    0.80
  -9  -6   0    1.70    0.40
  -9   6   0    1.20    0.50
   9   6   0    0.90    0.50
   9   6   0    0.80    0.80
   9   6   0    1.70    0.70
   0   7   0    0.30    0.50
   0  -7   0    0.00    0.40
   0   7   0    0.50    0.60
   0   7   0    0.20    0.50
   0   7   0   -0.70    0.30
   0   7   0    0.10    0.40
   0   7   0   -0.40    0.50
   0   7   0   -0.10    1.40
   1   7   0  139.79   10.00
  -1   7   0  131.39    9.90
  -1   7   0  131.69    7.20
   1   7   0  136.89    7.30
  -1   7   0  137.29    7.30
   1   7   0  143.29    7.20
   1  -7   0  144.99    7.20
   1   7   0  124.09    7.40
  -1   7   0  143.59    7.40
   1   7   0  149.79    7.70
  -1   7   0  130.79    7.40
   1   7   0  132.19    7.20
  -1   7   0  139.49    7.20
  -1   7   0  152.58    7.70
  -2   7   0   11.60    1.40
   2   7   0   11.30    1.50
  -2   7   0   10.00    2.60
   2   7   0   14.20    1.40
  -2   7   0   13.20    1.30
  -2   7   0   11.00    1.30
  -2   7   0   14.70    1.70
   2   7   0   12.60    1.30
  -2   7   0   12.90    1.30
  -2   7   0   11.60    1.60
   2   7   0   11.50    1.30
   2   7   0   12.10    1.30
   2  -7   0   13.40    1.20
   2   7   0   13.80    1.40
   2  -7   0   13.10    1.30
  -2  -7   0   13.90    3.00
   3  -7   0   76.69    4.40
   3   7   0   73.39    4.60
  -3   7   0   84.19    4.80
   3   7   0   76.29    4.60
  -3   7   0   78.49    4.80
   3   7   0   75.69    4.60
   3   7   0   76.89    4.30
   3   7   0   78.79    4.40
  -3   7   0   74.89    6.90
   3  -7   0   71.69    4.60
   3  -7   0   83.79    4.80
  -3   7   0   78.59    4.50
  -3   7   0   73.59    4.40
  -3   7   0   80.19    4.40
  -3   7   0   83.09    4.40
  -3   7   0   78.79    4.60
   3   7   0   81.79    4.60
  -3  -7   0   71.19    6.70
  -4   7   0   -0.20    0.70
   4   7   0    0.50    0.50
  -4   7   0    0.40    1.50
   4   7   0    1.70    0.50
   4  -7   0    0.30    0.60
  -4   7   0   -0.60    0.80
  -4  -7   0    0.70    2.10
  -4   7   0   -0.20    0.70
  -4   7   0    0.20    0.60
   4   7   0    0.70    0.60
  -4   7   0    0.80    0.60
   4  -7   0    0.80    0.80
  -4   7   0   -0.10    0.60
   4  -7   0    0.70    0.80
   4   7   0    0.90    0.60
   4   7   0    0.90    0.80
  -4   7   0    1.00    0.60
   5   7   0  360.76   18.30
  -5  -7   0  359.86   18.30
   5  -7   0  376.16   18.40
  -5   7   0  360.16   18.40
  -5   7   0  402.56   18.90
   5   7   0  383.86   18.70
  -5   7   0  353.76   18.30
   5  -7   0  395.56   19.10
   5   7   0  355.86   18.40
   5  -7   0  362.66   18.80
  -5   7   0  366.66   18.30
   5   7   0  371.46   18.70
   5   7   0  373.36   18.70
  -5   7   0  355.56   18.70
  -5   7   0  397.36   18.70
  -5   7   0  376.46   18.50
   6   7   0   70.19    4.40
  -6   7   0   75.59    4.20
   6   7   0   75.99    4.40
   6  -7   0   72.49    4.40
  -6  -7   0   68.69    4.20
   6   7   0   72.99    4.10
   6  -7   0   74.29    3.90
  -6   7   0   75.19    4.20
  -6   7   0   69.89    4.10
   6  -7   0   69.69    4.10
   6  -7   0   77.09    4.70
   6  -7   0   72.49    4.20
  -6   7   0   74.69    4.40
   6   7   0   68.29    4.30
   6   7   0   71.69    4.50
   7   7   0   84.19    5.20
   7  -7   0   92.69    4.60
   7   7   0   90.99    5.30
   7   7   0   91.49    4.90
   7   7   0   96.69    5.40
   7   7   0  101.59    5.20
  -7   7   0   90.89    5.10
  -7  -7   0   90.39    5.20
  -7   7   0   95.79    5.00
  -7  -7   0   89.59    4.90
   7  -7   0   95.49    5.00
   7  -7   0   81.69    5.10
   7  -7   0   93.09    5.50
   8   7   0  130.09    6.60
   8   7   0  135.49    6.70
   8  -7   0  124.79    6.90
   8   7   0  130.69    6.60
  -8   7   0  102.89    6.40
   8   7   0  112.69    6.20
   8  -7   0  122.79    6.40
  -8   7   0  125.99    6.40
   8  -7   0  133.49    6.60
   8   7   0  130.49    6.60
  -8  -7   0  119.19    6.30
   9   7   0  320.87   15.60
  -9   7   0  331.37   15.70
  -9   7   0  329.77   15.50
   9   7   0  322.27   15.60
   9  -7   0  303.87   15.60
   9   7   0  336.17   15.70
  -9  -7   0  296.77   15.40
   0   8   0   92.19    5.30
   0  -8   0   85.79    4.70
   0   8   0   87.89    4.70
   0   8   0   76.29    4.70
   0   8   0   87.09    4.70
   0   8   0   89.69    4.80
   0   8   0   62.09    7.20
   0   8   0   83.39    4.90
   1   8   0   30.80    2.30
  -1   8   0   32.80    2.60
  -1  -8   0   30.60    2.00
   1   8   0   31.30    2.20
  -1   8   0   27.60    2.50
  -1   8   0   25.70    4.60
  -1  -8   0   26.20    4.20
   1   8   0   25.80    2.50
   1   8   0   32.20    2.20
  -1   8   0   31.30    2.20
  -1   8   0   32.50    2.30
  -1   8   0   32.60    2.50
   1   8   0   31.20    2.10
   1   8   0   28.30    2.10
  -1   8   0   34.90    2.40
  -1   8   0   30.30    2.30
   1  -8   0   30.20    2.20
  -2   8   0    1.40    0.70
  -2   8   0    1.70    0.90
   2   8   0    1.00    0.80
   2  -8   0    1.30    0.80
   2   8   0    0.80    0.50
  -2   8   0    1.20    1.20
  -2   8   0    1.50    0.70
   2   8   0    2.30    0.60
   2   8   0    1.90    0.80
   2   8   0    2.10    0.70
   2   8   0    1.60    0.60
  -2   8   0    1.20    0.90
  -2   8   0    0.20    0.50
   2  -8   0    0.80    0.60
  -2   8   0    1.10    0.70
  -3   8   0   14.30    1.50
  -3   8   0    9.90    1.60
   3   8   0   14.50    1.70
   3  -8   0   17.10    1.60
  -3   8   0   14.30    1.70
  -3   8   0   16.70    1.80
  -3   8   0   15.90    1.40
   3   8   0   14.30    1.40
   3  -8   0   12.70    1.50
  -3   8   0   15.40    1.70
   3   8   0   13.10    1.50
  -3   8   0   13.20    1.60
   3   8   0   14.50    1.50
   3   8   0   14.00    1.30
   4  -8   0  349.77   19.70
  -4   8   0  407.46   19.50
  -4   8   0  421.36   19.90
   4   8   0  382.56   19.50
  -4   8   0  406.46   19.80
  -4   8   0  397.36   19.50
   4   8   0  372.26   19.20
   4   8   0  389.86   19.30
   4  -8   0  413.46   19.80
   4  -8   0  350.26   19.30
  -4   8   0  385.06   19.30
  -4   8   0  411.86   19.60
   4   8   0  412.36   19.60
  -4   8   0  393.26   19.40
   4   8   0  396.16   19.60
   5  -8   0    2.20    1.00
   5  -8   0    1.70    0.90
   5   8   0    2.80    0.80
   5   8   0    3.50    0.70
  -5   8   0    2.80    0.80
  -5   8   0    2.60    0.80
   5   8   0    3.20    0.90
   5  -8   0    2.20    1.00
  -5   8   0    2.50    0.70
   5   8   0    2.40    0.90
  -5  -8   0    2.50    0.70
  -5   8   0    2.40    0.70
  -5   8   0    3.10    0.80
  -5   8   0    3.50    0.80
   6   8   0   39.80    2.60
  -6  -8   0   37.40    2.50
   6   8   0   40.40    2.60
  -6   8   0   37.40    2.60
   6  -8   0   36.40    2.30
   6  -8   0   34.90    2.20
   6  -8   0   36.70    2.90
  -6   8   0   37.70    2.30
  -6   8   0   38.10    2.50
   6   8   0   37.90    2.40
   6  -8   0   33.00    2.50
   6   8   0   37.00    2.30
   6   8   0   41.40    2.80
  -6   8   0   42.50    2.50
   7   8   0  100.79    5.40
  -7  -8   0   92.99    5.00
   7   8   0  101.69    5.30
   7   8   0   91.79    5.00
  -7   8   0   97.39    5.20
   7   8   0  105.59    5.40
   7  -8   0   92.19    4.80
  -7   8   0   91.69    5.00
   7  -8   0   94.49    5.50
   7  -8   0  103.49    5.40
  -7   8   0   94.49    5.10
   8   8   0    0.40    0.40
  -8   8   0    1.10    0.40
   8   8   0    0.10    0.40
   8   8   0    0.70    0.60
   8   8   0    0.40    0.40
  -8   8   0    0.30    0.30
   8  -8   0    0.90    0.50
   0   9   0    0.70    0.60
   0   9   0   -0.10    0.80
   0   9   0    0.10    0.80
   0  -9   0    0.40    0.60
   0   9   0    0.00    0.40
   0   9   0    0.40    0.50
   0   9   0    0.20    0.70
   1   9   0  128.69    6.80
   1   9   0  127.39    6.70
  -1   9   0  128.69    6.70
  -1  -9   0  120.59    6.60
   1   9   0  122.29    6.80
  -1   9   0  104.79    7.00
   1  -9   0  119.99    6.60
   1  -9   0  133.09    6.90
  -1   9   0  126.89    6.90
  -1   9   0  129.99    6.70
  -1   9   0  126.69    6.80
   1   9   0  129.59    6.90
   1   9   0  130.89    6.70
  -1   9   0  129.39    6.80
   1   9   0  132.29    7.30
   2  -9   0   11.70    1.60
  -2   9   0   12.00    1.30
   2  -9   0   11.90    1.40
   2   9   0   12.70    1.30
   2   9   0    9.80    1.50
  -2   9   0   10.20    1.50
  -2   9   0   12.00    1.50
   2   9   0   10.70    1.20
  -2   9   0   11.90    1.50
   2   9   0   11.10    1.30
  -2   9   0    8.80    1.30
   2   9   0   11.90    1.40
  -2  -9   0   11.60    1.30
  -2   9   0   11.40    1.40
  -2   9   0   11.00    1.20
  -3   9   0   44.30    3.10
   3   9   0   46.50    3.10
   3  -9   0   50.49    3.10
  -3   9   0   45.90    3.20
   3   9   0   50.29    3.00
   3   9   0   49.80    3.20
   3  -9   0   50.19    3.40
  -3   9   0   48.90    3.40
  -3   9   0   49.50    3.20
  -3   9   0   46.30    3.00
   3   9   0   50.79    2.90
  -3   9   0   50.19    3.50
  -3   9   0   45.60    3.00
  -4   9   0   49.50    3.40
  -4   9   0   59.89    3.60
   4  -9   0   56.59    3.80
   4   9   0   58.99    3.60
   4   9   0   59.69    3.40
  -4   9   0   63.29    4.00
   4   9   0   62.29    3.70
  -4   9   0   59.49    3.50
   4  -9   0   63.69    3.60
   4   9   0   55.89    3.30
  -4   9   0   56.99    3.40
  -4   9   0   60.59    3.60
   5  -9   0   75.59    4.10
   5  -9   0   70.29    3.80
  -5   9   0   73.29    3.90
  -5   9   0   72.79    3.90
   5  -9   0   58.89    4.10
  -5   9   0   68.09    3.80
   5   9   0   67.49    4.00
  -5  -9   0   61.89    3.80
  -5   9   0   66.59    4.20
   5   9   0   73.59    4.00
   5  -9   0   67.29    3.60
   5   9   0   68.99    3.90
  -5   9   0   62.69    3.80
   5   9   0   66.89    3.70
  -5   9   0   67.39    3.90
   6   9   0   14.30    1.10
   6   9   0   13.20    1.30
  -6   9   0   14.30    1.30
  -6   9   0   12.00    1.10
   6   9   0   13.00    1.30
   6  -9   0   13.90    1.00
   6  -9   0   15.70    1.40
  -6   9   0   13.80    1.20
   6   9   0   13.30    1.30
   6  -9   0   12.30    1.30
  -6   9   0   14.50    1.30
  -7   9   0    9.00    0.90
   7  -9   0   10.30    0.80
   7   9   0    9.30    1.00
   7  -9   0   12.90    1.10
   7   9   0   11.60    1.00
   0  10   0    9.60    1.40
   0 -10   0    7.50    1.40
   0  10   0    9.60    1.20
   0 -10   0    8.30    1.20
   0  10   0    6.80    1.10
   0  10   0    7.90    1.10
   0  10   0    7.90    1.10
   0  10   0    7.00    1.00
   1  10   0   51.79    3.50
  -1  10   0   44.60    3.10
   1 -10   0   53.59    3.30
   1  10   0   54.39    3.30
  -1 -10   0   48.40    3.10
   1 -10   0   50.49    3.00
  -1  10   0   41.90    3.00
  -1  10   0   55.49    3.20
  -1  10   0   52.59    3.50
  -1  10   0   52.69    3.30
   1  10   0   51.69    3.00
   1  10   0   51.89    3.30
   1  10   0   54.89    3.10
  -1  10   0   52.09    3.10
   2  10   0   68.49    3.90
  -2  10   0   71.49    4.50
   2  10   0   71.89    3.90
  -2  10   0   71.59    4.00
  -2  10   0   60.99    3.90
  -2 -10   0   62.59    3.80
   2  10   0   68.49    4.00
   2  10   0   71.19    3.80
   2  10   0   65.19    4.10
   2 -10   0   70.39    3.90
  -2  10   0   65.29    3.90
  -2  10   0   67.99    4.00
  -2  10   0   64.39    3.80
   2 -10   0   73.49    4.20
   3 -10   0  157.68    7.60
   3 -10   0  143.69    7.60
  -3  10   0  144.79    7.90
  -3  10   0  148.49    7.60
  -3  10   0  138.79    7.60
  -3  10   0  139.89    7.60
   3  10   0  143.49    7.40
   3 -10   0  137.69    7.80
   3  10   0  147.79    7.60
   3 -10   0  154.38    7.30
  -3  10   0  139.49    7.50
   3  10   0  142.99    7.40
  -3  10   0  152.28    7.50
  -4  10   0   30.10    2.00
   4  10   0   28.50    2.00
   4 -10   0   34.20    2.30
  -4  10   0   30.30    2.10
  -4  10   0   31.40    2.40
  -4  10   0   31.90    2.10
   4  10   0   30.50    2.00
   4  10   0   29.80    1.90
   4 -10   0   36.10    2.00
   4  10   0   33.90    2.20
  -4  10   0   34.30    2.10
   4 -10   0   32.20    2.10
  -4  10   0   32.30    2.10
   5 -10   0   22.10    1.60
  -5  10   0   23.60    1.60
   5  10   0   20.50    1.50
  -5  10   0   22.40    1.50
  -5  10   0   22.80    1.60
   5 -10   0   23.50    1.40
  -5  10   0   24.70    1.50
   5 -10   0   20.70    1.60
   5  10   0   21.20    1.50
   5  10   0   20.60    1.40
  -5  10   0   18.80    1.70
   6 -10   0   22.00    1.20
   6  10   0   17.90    1.30
   6  10   0   20.10    1.30
  -6  10   0   23.60    1.40
   6 -10   0   22.90    1.50
   0 -11   0    0.90    0.50
   0  11   0   -0.30    0.60
   0  11   0    0.10    0.60
   0  11   0   -0.30    0.50
   0  11   0    0.30    0.50
   0  11   0    0.30    0.50
   0  11   0   -0.40    0.50
   1  11   0  112.09    5.50
   1  11   0  104.39    5.80
  -1  11   0  104.19    5.60
   1  11   0  109.99    5.60
  -1  11   0  116.49    5.60
  -1  11   0  100.89    5.50
   1 -11   0  106.09    5.50
  -1  11   0  109.59    5.60
  -1  11   0   87.49    5.50
  -1  11   0  106.79    5.90
   1  11   0  117.69    5.60
   1  11   0  100.29    5.60
   2  11   0   16.70    1.30
   2  11   0   16.60    1.40
   2 -11   0   19.30    1.20
  -2  11   0   20.60    1.50
  -2  11   0   18.10    1.30
   2  11   0   17.70    1.30
  -2  11   0   18.50    1.40
   2  11   0   14.50    2.10
   2 -11   0   17.80    1.30
  -2  11   0   17.40    1.80
   2  11   0   17.40    1.30
  -2  11   0   18.10    1.40
   3  11   0    0.50    0.30
   3 -11   0    0.30    0.50
  -3  11   0    0.30    0.50
  -3  11   0    0.50    0.40
   3  11   0    0.10    0.30
  -3  11   0   -0.20    0.40
   3 -11   0    0.30    0.40
  -3  11   0    0.40    0.50
  -3  11   0    0.60    0.60
   3  11   0    0.00    0.30
  -4  11   0    0.20    0.30
  -4  11   0   -0.10    0.30
  -4  11   0    0.20    0.40
   4 -11   0   -0.10    0.30
  -4  11   0    0.30    0.30
   4  11   0    0.10    0.30
   4  11   0    0.20    0.30
   0   0  -1    0.60    0.20
   0   0   1    0.30    0.20
   0   0  -1    1.10    0.30
   0   0   1    0.70    0.10
   0   0   1    0.40    0.30
   0   0  -1    0.30    0.20
   0   0   1    0.40    0.20
  -1   0   1   40.60    2.40
   1   0   1   45.00    2.60
  -1   0   1   42.30    2.20
   1   0  -1   43.70    2.80
  -1   0  -1   41.70    2.60
   1   0   1   44.70    2.80
   1   0   1   39.10    2.60
   1   0  -1   46.20    2.40
  -1   0   1   44.40    2.80
   1   0  -1   43.10    2.60
   1   0   1   41.40    2.80
   1   0   1   41.50    2.70
  -1   0  -1   51.89    2.90
  -1   0  -1   44.30    2.60
  -1   0   1   45.40    2.80
  -1   0  -1   44.00    2.80
  -1   0   1   47.00    2.80
   1   0  -1   42.30    2.60
   2   0   1  656.83   34.50
  -2   0  -1  666.83   34.50
  -2   0  -1  623.84   34.60
  -2   0  -1  702.73   34.50
   2   0  -1  745.93   34.50
   2   0   1  766.72   34.80
   2   0  -1  635.84   34.60
  -2   0  -1  702.43   34.30
  -2   0   1  718.43   33.90
   2   0   1  726.43   34.50
   2   0  -1  713.63   34.70
  -2   0  -1  752.62   34.60
  -2   0   1  768.52   34.70
   2   0   1  661.43   34.50
  -3   0  -1 7071.29  323.97
   3   0  -1 6680.03  324.47
  -3   0  -1 6877.11  325.97
  -3   0   1 6107.19  324.07
   3   0   1 5995.30  323.87
   3   0  -1 7278.27  324.57
  -3   0  -1 6302.07  324.17
   3   0   1 7082.99  324.27
   3   0   1 7011.80  324.37
  -3   0   1 6797.42  323.37
   3   0  -1 6917.01  324.07
   3   0   1 7306.47  324.57
  -4   0  -1  471.55   24.00
   4   0   1  456.95   23.80
   4   0  -1  452.35   23.60
   4   0   1  455.15   23.90
   4   0  -1  468.25   24.20
  -4   0  -1  429.16   22.00
  -4   0   1  443.26   22.00
   4   0   1  473.55   24.10
  -4   0   1  417.76   22.60
  -4   0  -1  461.45   23.30
   4   0  -1  452.95   24.10
  -4   0   1  480.25   24.00
  -4   0  -1  435.46   23.00
  -5   0   1  231.88   13.20
   5   0  -1  242.58   14.90
  -5   0   1  259.97   14.90
  -5   0  -1  242.58   12.40
  -5   0   1  249.28   12.40
   5   0   1  245.38   14.70
   5   0   1  235.58   14.80
  -5   0  -1  253.97   13.90
  -5   0  -1  249.38   14.70
   5   0  -1  258.27   14.40
   5   0   1  245.48   14.40
   5   0  -1  258.17   15.10
   6   0  -1  175.98   11.30
   6   0   1  175.18   12.00
  -6   0   1  160.68   11.80
   6   0   1  165.48   11.30
  -6   0   1  174.78   11.70
  -6   0  -1  179.18    8.70
   6   0  -1  151.28   11.60
   6   0  -1  176.58    9.20
  -6   0   1  179.68    8.70
   6   0   1  159.68   11.40
  -6   0  -1  164.88   10.50
   6   0   1  158.08    9.00
  -6   0   1  193.18    9.10
  -6   0  -1  177.58    9.00
  -6   0  -1  173.58   11.70
   7   0  -1  418.96   20.80
   7   0   1  386.16   23.80
  -7   0  -1  449.06   20.70
  -7   0   1  454.45   21.10
  -7   0   1  434.66   20.50
   7   0  -1  446.16   21.00
   7   0   1  415.46   21.10
  -7   0  -1  414.36   20.40
  -7   0  -1  408.26   20.70
   7   0  -1  433.96   21.20
   7   0  -1  417.56   20.90
   7   0   1  424.96   20.80
   7   0   1  382.36   20.70
   7   0   1  430.16   20.90
   7   0  -1  370.76   20.70
  -7   0   1  400.36   20.60
  -7   0  -1  445.96   21.10
  -7   0   1  445.26   20.70
   7   0  -1  422.96   20.80
   7   0   1  428.06   20.90
   8   0   1   18.50    1.80
   8   0  -1   18.60    1.90
   8   0  -1   16.60    2.00
   8   0   1   19.20    1.80
  -8   0   1   20.60    2.20
   8   0  -1   19.90    1.90
   8   0   1   17.50    1.90
   8   0  -1   17.40    1.70
  -8   0  -1   22.40    1.70
  -8   0   1   18.60    1.50
   8   0  -1   20.00    2.00
   8   0  -1   20.90    1.90
   8   0   1   18.20    1.80
  -8   0  -1   19.40    1.50
  -8   0   1   18.20    1.60
   8   0   1   19.10    1.70
  -8   0  -1   19.90    1.60
  -8   0   1   20.10    1.70
   9   0  -1   29.10    2.40
  -9   0  -1   30.10    2.50
  -9   0  -1   29.20    1.90
  -9   0   1   29.80    2.20
   9   0   1   30.00    2.40
  -9   0   1   29.60    2.10
   9   0  -1   27.80    2.30
  -9   0   1   30.10    2.00
   9   0  -1   31.40    2.30
   9   0  -1   30.90    2.20
   9   0   1   31.00    2.20
  -9   0  -1   29.50    2.20
  -9   0   1   29.80    2.40
 -10   0   1   35.50    2.70
  10   0  -1   35.10    2.40
 -10   0  -1   38.10    2.70
  10   0  -1   40.30    2.50
  10   0   1   37.00    2.60
 -10   0   1   36.90    2.10
  10   0   1   40.20    2.50
  10   0  -1   39.20    2.50
 -10   0  -1   38.90    2.40
 -11   0  -1    9.90    0.80
  11   0   1    8.20    0.80
  11   0  -1   11.00    1.00
  11   0   1    9.30    1.00
 -11   0   1   11.80    1.10
  11   0  -1   11.70    0.90
   0  -1  -1 3421.96  158.58
   0   1  -1 3530.55  157.68
   0   1  -1 3458.75  156.68
   0  -1   1 2897.21  155.98
   0  -1   1 3176.98  155.68
   0   1   1 3644.44  157.98
   0   1   1 3386.16  155.68
   0   1  -1 3459.15  156.38
   0  -1   1 3309.17  155.88
   0   1   1 2869.81  155.48
   0  -1  -1 2908.91  155.68
   0  -1  -1 3421.26  157.78
   0   1   1 3080.59  156.18
   0  -1  -1 3126.29  155.78
   0   1   1 3047.90  155.78
   0   1  -1 3488.85  158.18
   0  -1   1 3297.57  157.78
   1  -1   1  356.76   16.50
  -1  -1  -1  357.36   17.10
   1  -1   1  333.37   16.60
   1  -1   1  339.97   16.90
  -1  -1  -1  334.27   16.80
   1   1  -1  347.37   16.70
  -1   1   1  322.87   16.80
   1   1  -1  344.67   17.00
   1   1  -1  339.47   16.90
   1  -1   1  295.17   16.50
  -1  -1  -1  347.37   16.70
   1  -1   1  312.47   17.10
   1   1  -1  366.36   16.40
  -1  -1  -1  343.27   17.10
  -1   1   1  327.87   16.80
  -1   1   1  309.77   16.50
  -1  -1  -1  350.56   16.20
   1   1  -1  351.16   16.80
  -1   1   1  374.06   16.70
   1  -1  -1  338.27   16.40
   1  -1  -1  327.57   16.60
   1   1   1  333.47   17.00
  -1  -1   1  317.87   16.60
  -1   1  -1  290.87   16.80
   1  -1  -1  351.26   16.90
   1   1   1  320.47   17.10
  -1   1  -1  363.36   16.60
  -1   1  -1  339.27   17.20
   1   1   1  349.87   16.80
   1  -1  -1  351.36   17.00
  -1   1  -1  342.27   16.60
   1   1   1  330.37   16.20
  -1   1  -1  326.47   16.70
  -1  -1   1  353.66   16.70
  -1  -1   1  323.97   17.00
   1  -1  -1  323.07   16.80
  -1  -1   1  311.17   16.60
  -1  -1   1  323.17   16.80
  -2  -1  -1 9591.04  429.46
   2   1  -1 9695.53  433.46
   2  -1   1 8923.91  427.36
   2  -1   1 9594.04  433.06
  -2   1   1 9097.99  432.26
  -2   1   1 8616.34  427.16
  -2   1   1 8037.40  429.36
  -2   1   1 8132.89  426.86
   2   1  -1 9231.08  428.66
  -2  -1  -1 9653.83  435.56
   2  -1   1 8068.39  428.66
  -2  -1  -1 8341.77  428.46
   2  -1   1 7679.23  426.36
  -2  -1   1 9443.75  428.66
  -2   1  -1 9099.79  434.96
  -2  -1   1 8927.51  428.46
   2  -1  -1 8203.08  430.16
  -2   1  -1 8679.23  428.96
  -2   1  -1 9481.75  431.76
  -2   1  -1 8791.72  428.76
   2  -1  -1 8582.34  425.76
   2   1   1 8012.90  430.76
  -2  -1   1 9154.08  429.06
   2   1   1 9999.00  431.06
  -2  -1   1 9890.31  430.96
   2   1   1 9377.76  430.76
   2  -1  -1 9644.24  430.56
   2  -1  -1 8257.37  430.06
   2   1   1 9185.48  430.96
  -3  -1  -1 1150.68   54.79
  -3  -1  -1 1130.59   54.79
  -3  -1  -1 1078.89   55.19
   3   1  -1 1115.89   55.19
   3  -1   1 1110.79   54.89
   3   1  -1 1124.29   55.69
  -3   1   1 1086.59   54.39
   3  -1   1 1216.48   55.59
   3  -1   1 1162.28   54.99
  -3   1   1 1129.39   55.29
   3   1  -1 1092.99   55.19
  -3  -1   1 1149.19   54.39
   3  -1  -1 1097.49   55.59
   3   1   1  947.71   54.79
  -3  -1   1 1103.99   55.19
  -3   1  -1 1182.68   55.39
   3  -1  -1 1155.68   54.59
  -3   1  -1 1142.49   54.79
   3   1   1 1187.48   55.79
   3  -1  -1 1014.20   54.39
   3   1   1 1069.19   55.19
   3   1   1 1236.78   54.99
  -3   1  -1 1169.58   55.19
  -4   1   1  459.65   23.50
  -4  -1  -1  512.95   25.60
   4  -1   1  468.05   25.10
  -4  -1  -1  471.85   23.50
   4  -1   1  486.25   25.70
   4   1  -1  528.35   25.70
  -4   1   1  489.95   24.40
  -4  -1  -1  450.15   24.40
  -4   1   1  540.15   25.70
   4  -1   1  493.15   25.10
  -4  -1  -1  495.15   24.80
   4   1  -1  520.75   26.10
  -4   1  -1  503.85   24.80
   4  -1  -1  489.15   24.90
  -4  -1   1  446.36   23.40
  -4   1  -1  504.05   25.40
  -4  -1   1  442.26   24.20
   4   1   1  504.45   26.10
   4  -1  -1  407.86   25.50
  -4   1  -1  458.55   25.00
   4  -1  -1  464.15   23.90
   4   1   1  514.25   25.10
   4   1   1  473.05   25.30
  -4  -1   1  516.85   25.60
  -5  -1  -1   97.19    5.10
  -5   1   1   86.19    6.80
  -5   1   1   86.39    5.10
   5   1  -1   91.99    6.90
  -5  -1  -1  103.49    7.30
   5  -1   1   82.49    6.60
  -5   1   1   94.19    7.20
   5   1  -1   99.19    7.30
  -5   1   1   87.59    5.90
  -5  -1  -1   93.59    6.50
   5  -1   1   96.79    7.40
   5  -1   1  100.39    6.90
   5   1  -1   95.79    7.50
  -5  -1   1   99.29    7.30
  -5  -1   1   96.89    5.90
  -5   1  -1  100.59    7.30
   5  -1  -1   80.19    5.10
   5  -1  -1  100.49    6.70
  -5   1  -1   83.99    5.10
  -5  -1   1   95.59    5.10
   5  -1  -1   94.99    7.40
   5   1   1   97.59    7.70
   5   1   1   89.69    7.00
   5   1   1   90.99    6.80
  -5   1  -1   95.69    6.40
   6  -1   1  105.79    5.90
   6   1  -1   98.09    8.70
   6   1  -1  105.49    8.30
  -6   1   1  104.99    5.40
  -6  -1  -1  104.59    5.40
  -6  -1  -1  111.29    5.80
   6  -1   1  103.79    7.80
   6  -1   1  101.59    8.40
  -6   1   1  105.19    5.70
  -6  -1  -1   94.19    8.20
   6   1  -1  117.69    8.30
   6   1  -1  100.89    5.80
  -6   1   1   95.29    8.00
   6  -1  -1  102.39    8.50
   6  -1  -1   95.99    7.40
   6   1   1  108.69    8.30
   6   1   1  100.39    8.60
  -6   1  -1  105.99    8.40
  -6   1  -1   97.19    7.20
  -6   1  -1  100.19    5.40
  -6  -1   1  103.89    5.70
   6   1   1   95.69    7.80
  -6   1  -1   98.19    5.70
   6  -1  -1  107.19    5.90
  -6  -1   1  101.39    5.40
  -6  -1   1  104.99    8.30
  -7  -1  -1  204.78   10.20
   7   1  -1  185.78    9.90
   7   1  -1  192.58    9.90
   7  -1   1  194.08   10.00
   7  -1   1  195.98   10.00
   7  -1   1  184.28   10.00
   7   1  -1  188.98   10.00
  -7   1   1  195.88    9.80
   7  -1   1  184.78   12.60
   7   1  -1  176.18   12.90
   7   1  -1  177.78    9.90
  -7   1   1  202.98    9.60
  -7  -1  -1  189.48    9.60
  -7  -1  -1  210.08    9.90
  -7   1   1  188.18    9.70
   7  -1   1  199.38   10.30
   7   1  -1  205.38   10.30
   7   1  -1  182.98   10.00
   7   1  -1  199.68   10.00
   7  -1  -1  190.08    9.90
   7   1   1  189.18    9.90
  -7  -1   1  197.48    9.80
   7   1   1  193.58   10.00
  -7   1  -1  186.38    9.70
   7   1   1  185.88   10.00
   7   1   1  191.78   13.10
   7  -1  -1  199.88   10.00
  -7   1  -1  187.18    9.80
   7   1   1  199.48   10.10
   7  -1  -1  211.18   10.50
  -7  -1   1  184.28    9.70
   7   1   1  181.08    9.90
  -7  -1   1  208.28   10.30
  -7   1  -1  192.98    9.50
   7   1   1  199.48   10.40
   7  -1  -1  184.58   10.00
  -7  -1   1  182.58    9.60
   8  -1   1  208.28   10.70
  -8   1   1  221.18   11.00
  -8  -1  -1  204.48   11.00
   8   1  -1  204.18   10.70
  -8   1   1  211.98   10.30
  -8  -1  -1  209.78   10.60
   8   1  -1  209.08   10.70
   8   1  -1  196.58   10.70
   8   1  -1  206.38   11.00
   8   1  -1  204.68   10.80
  -8   1   1  200.98   10.50
   8   1  -1  206.38   10.70
  -8   1   1  202.68   10.50
  -8  -1  -1  205.78   10.30
   8   1  -1  221.48   10.90
   8  -1   1  210.58   11.10
  -8  -1  -1  211.18   10.60
   8  -1   1  199.08   10.70
   8   1   1  203.88   10.70
  -8  -1   1  208.28   10.60
   8  -1  -1  211.08   10.70
   8  -1  -1  205.18   10.70
  -8  -1   1  207.38   10.40
   8   1   1  208.18   10.80
  -8   1  -1  193.28   10.50
  -8   1  -1  213.38   10.90
   8   1   1  210.08   10.70
  -8   1  -1  207.48   10.20
  -8  -1   1  201.78   10.90
   8   1   1  215.18   10.80
   8   1   1  202.48   10.70
   8  -1  -1  217.18   11.20
   8  -1  -1  221.88   10.80
  -8  -1   1  196.08   10.50
  -9  -1  -1   13.90    1.30
   9   1  -1   14.30    1.50
   9   1  -1   15.50    1.70
  -9  -1  -1   16.00    1.30
  -9   1   1   14.70    1.20
  -9  -1  -1   16.50    1.50
  -9   1   1   14.90    1.50
   9   1  -1   13.20    1.60
   9  -1   1   13.30    1.80
  -9   1   1   15.80    1.70
   9   1  -1   16.10    1.50
   9  -1   1   14.80    1.50
   9  -1   1   15.10    1.70
   9   1  -1   15.30    1.60
   9   1   1   14.00    1.60
  -9   1  -1   15.70    1.50
   9  -1  -1   15.40    1.70
   9  -1  -1   15.00    1.40
  -9  -1   1   13.60    1.80
  -9  -1   1   15.40    1.40
   9  -1  -1   15.10    1.70
   9   1   1   16.30    1.50
   9   1   1   15.50    1.50
   9   1   1   14.50    1.50
  -9   1  -1   16.30    1.70
   9   1   1   15.20    1.60
  -9  -1   1   15.00    1.40
  -9  -1   1   15.90    1.50
   9  -1  -1   17.30    1.60
  10   1  -1   91.79    5.10
 -10  -1  -1   96.19    4.70
 -10  -1  -1   99.49    5.30
 -10   1   1   76.99    5.10
  10   1  -1   88.49    5.00
  10  -1   1  101.39    5.20
  10  -1   1   96.29    5.10
  10   1  -1   93.79    5.10
 -10  -1  -1   97.29    5.00
  10   1  -1   95.39    5.10
  10  -1  -1   88.89    5.30
  10   1   1   91.79    5.20
 -10  -1   1   91.09    5.30
 -10   1  -1  100.69    5.00
  10   1   1   89.19    5.00
 -10   1  -1   92.49    5.20
  10  -1  -1   95.29    5.10
 -10  -1   1   99.99    4.80
  10  -1  -1   91.19    5.10
  10   1   1   89.49    5.00
  11  -1   1    2.90    0.60
 -11  -1  -1    5.00    0.70
  11   1  -1    5.10    0.60
 -11   1   1    4.80    0.70
  11  -1   1    4.90    0.60
  11   1  -1    4.20    0.60
 -11   1  -1    5.30    0.60
  11  -1  -1    5.40    0.70
  11  -1  -1    4.50    0.60
  11   1   1    3.10    0.60
 -11  -1   1    6.60    0.90
   0   2  -1 3203.88  145.29
   0   2  -1 3354.56  145.29
   0  -2   1 2942.41  145.59
   0   2  -1 3398.26  145.09
   0   2   1 3162.68  144.79
   0  -2  -1 2919.61  144.99
   0   2   1 2684.53  145.39
   0   2   1 2753.92  144.99
   0  -2   1 3063.39  145.19
   0  -2   1 2895.61  145.19
   0   2   1 2874.31  145.19
   0  -2   1 3334.07  145.19
   0   2   1 2984.20  145.29
   0  -2  -1 2935.51  145.19
   0  -2   1 3309.47  145.49
   0  -2  -1 2875.91  146.09
   0   2  -1 2930.31  145.89
   1   2  -1 2575.54  116.09
   1   2  -1 2654.23  116.39
  -1  -2  -1 2145.19  115.39
   1  -2   1 2488.35  115.99
  -1  -2  -1 2462.65  115.49
   1   2  -1 2720.43  116.69
   1  -2   1 2333.17  116.49
  -1   2   1 2621.74  115.79
   1  -2   1 2554.74  115.79
  -1   2   1 2082.19  116.29
   1   2  -1 2658.73  116.79
   1  -2   1 2287.77  115.49
   1   2  -1 2701.33  116.29
  -1  -2  -1 2752.02  117.29
   1  -2   1 2273.67  116.49
   1   2  -1 2606.54  116.29
  -1   2   1 2133.09  116.29
  -1   2   1 2320.17  116.09
  -1   2  -1 2669.03  116.29
  -1   2  -1 2236.68  116.09
   1  -2  -1 2235.28  115.69
   1   2   1 2653.93  116.69
   1  -2  -1 2313.07  116.89
  -1   2  -1 2328.27  116.99
   1   2   1 2149.88  115.99
   1  -2  -1 2536.35  116.39
   1   2   1 2278.77  116.39
  -1  -2   1 2196.08  116.49
  -1  -2   1 2290.97  116.79
   2   2  -1 4274.27  189.98
  -2  -2  -1 4290.67  189.78
  -2   2   1 4306.97  189.58
   2  -2   1 4102.29  190.98
  -2   2   1 4026.90  189.08
  -2  -2  -1 3432.06  188.98
  -2  -2  -1 3479.75  189.78
   2  -2   1 4269.57  189.28
   2   2  -1 3905.71  190.38
  -2   2   1 3581.94  189.78
   2  -2   1 3964.80  190.18
  -2  -2  -1 4370.66  190.38
   2   2  -1 3804.52  189.78
  -2   2   1 3825.92  189.08
   2  -2  -1 4284.67  190.28
  -2  -2   1 3757.92  189.58
  -2   2  -1 4512.85  190.88
  -2  -2   1 4045.20  189.38
  -2   2  -1 4000.90  189.68
   2   2   1 4131.49  188.98
   2  -2  -1 3631.54  190.08
  -2  -2   1 3564.94  189.58
  -2   2  -1 3989.00  189.18
   2  -2  -1 3928.71  188.88
   2   2   1 3539.45  190.18
   2   2   1 3540.85  189.78
  -2  -2   1 3940.41  189.88
  -2   2  -1 4469.05  189.98
   3   2  -1  234.68   14.40
  -3   2   1  258.27   13.90
  -3  -2  -1  276.17   14.20
   3  -2   1  269.97   13.90
  -3  -2  -1  295.37   14.90
   3   2  -1  280.47   14.50
  -3  -2  -1  285.27   14.50
  -3   2   1  225.58   14.40
  -3   2   1  255.57   13.70
   3  -2   1  270.27   13.70
   3  -2   1  262.67   14.90
   3   2   1  262.57   14.60
  -3   2  -1  225.28   13.50
  -3  -2   1  243.58   13.40
   3  -2  -1  281.37   15.00
   3   2   1  230.28   14.80
  -3  -2   1  286.37   14.70
   3   2   1  277.57   13.80
  -3   2  -1  280.77   14.50
  -3   2  -1  288.57   15.10
   3  -2  -1  292.27   14.70
  -3  -2   1  265.67   13.80
   3  -2  -1  267.07   13.60
  -3   2  -1  261.17   14.20
   4  -2   1  250.27   13.90
  -4  -2  -1  250.07   12.80
  -4   2   1  259.77   14.80
   4   2  -1  254.37   14.80
   4  -2   1  282.87   15.60
   4  -2   1  222.48   12.80
   4   2  -1  261.97   14.70
  -4   2   1  259.97   14.00
   4   2  -1  243.78   15.40
  -4   2   1  247.88   13.90
   4  -2   1  274.87   14.20
  -4  -2  -1  236.48   13.90
  -4  -2  -1  268.87   14.30
  -4  -2  -1  271.47   15.00
   4   2   1  286.37   15.80
  -4   2  -1  266.17   14.80
  -4  -2   1  277.47   15.00
  -4   2  -1  274.47   15.10
   4   2   1  266.27   14.10
   4   2   1  253.87   14.90
  -4  -2   1  241.78   12.70
  -4   2  -1  272.87   14.40
  -4  -2   1  259.97   13.80
   4  -2  -1  280.87   15.60
   4  -2  -1  257.87   13.90
  -5  -2  -1  170.98   11.10
   5  -2   1  140.09    9.80
   5  -2   1  169.48   11.40
  -5   2   1  166.68    9.90
   5   2  -1  189.48   11.20
   5   2  -1  168.28   10.80
   5  -2   1  170.18    8.90
  -5  -2  -1  171.78   10.20
   5   2  -1  164.98   11.70
  -5   2   1  180.48   11.10
  -5  -2  -1  167.38    8.60
  -5  -2   1  139.79   10.00
   5  -2  -1  170.78    8.90
  -5   2  -1  181.68   10.40
   5   2   1  171.68   11.90
  -5  -2   1  174.98   11.10
  -5  -2   1  172.08    8.50
   5   2   1  164.38   10.20
   5  -2  -1  184.08   11.90
  -5   2  -1  167.38   10.80
   5  -2  -1  141.39    9.70
  -6  -2  -1  216.48   14.30
   6   2  -1  201.58   11.30
   6  -2   1  236.88   11.60
  -6   2   1  216.48   14.20
   6   2  -1  247.98   14.60
   6   2  -1  202.18   13.80
  -6  -2  -1  210.98   11.00
   6   2  -1  218.18   15.10
   6  -2   1  216.28   14.90
  -6  -2  -1  236.68   11.40
  -6  -2   1  237.28   11.30
  -6   2  -1  195.98   13.80
  -6   2  -1  215.78   13.20
  -6  -2   1  223.58   11.00
   6   2   1  200.58   14.80
   6   2   1  239.78   14.50
   6  -2  -1  238.88   11.70
  -6  -2   1  211.48   14.30
   7   2  -1    1.50    1.60
   7   2  -1    1.20    0.60
   7   2  -1    2.10    0.70
   7   2  -1    0.90    0.70
  -7  -2  -1    2.10    0.90
   7   2  -1    1.30    0.60
  -7  -2  -1    1.90    0.60
  -7  -2  -1    0.90    0.60
   7  -2   1    1.40    0.70
   7  -2   1    2.20    0.70
  -7   2   1    1.80    0.60
   7   2  -1    2.20    0.80
   7  -2   1    2.00    0.70
  -7   2   1    1.40    0.70
  -7   2   1    2.30    0.90
   7   2  -1    1.40    0.80
   7  -2  -1    1.90    0.80
  -7   2  -1    1.90    0.90
   7   2   1    1.00    0.70
  -7   2  -1    1.10    0.60
   7   2   1    5.30    2.20
   7  -2  -1    4.20    1.00
   7  -2  -1    1.40    0.70
  -7  -2   1    1.00    0.70
  -7  -2   1    1.40    0.60
  -7   2  -1    1.30    0.50
   7   2   1    1.30    0.70
   7   2   1    2.00    0.50
   7   2   1    2.30    0.90
  -7  -2   1    1.70    0.60
   7  -2  -1    1.90    0.90
  -8   2   1  296.37   14.50
  -8   2   1  271.87   14.10
   8   2  -1  306.37   14.80
   8  -2   1  305.37   14.70
  -8  -2  -1  295.67   14.50
   8  -2   1  305.57   14.80
   8  -2   1  301.17   15.20
   8   2  -1  298.27   14.80
   8   2  -1  290.37   14.60
  -8  -2  -1  299.17   15.00
  -8   2   1  308.57   15.00
   8   2  -1  260.57   14.70
  -8  -2  -1  269.67   14.50
   8   2  -1  300.67   14.80
  -8  -2  -1  285.47   14.30
   8   2  -1  264.27   14.60
   8   2   1  283.17   14.70
  -8  -2   1  272.97   14.40
   8  -2  -1  306.77   15.20
  -8  -2   1  298.37   15.00
   8   2   1  293.77   14.80
   8   2   1  310.27   14.90
   8  -2  -1  307.87   14.80
  -8   2  -1  318.37   14.90
   8   2   1  279.57   14.70
  -8   2  -1  295.47   14.50
   8  -2  -1  279.97   14.60
   8  -2  -1  283.87   14.60
   8   2   1  281.97   14.70
  -8  -2   1  261.87   14.50
  -8  -2   1  288.57   14.30
  -9   2   1   32.60    2.50
  -9  -2  -1   31.00    2.20
  -9  -2  -1   32.50    2.30
  -9   2   1   31.40    2.20
  -9  -2  -1   31.80    2.00
   9  -2   1   31.30    2.30
   9  -2   1   29.90    2.50
   9   2  -1   29.50    2.30
   9  -2   1   33.90    2.40
   9   2  -1   29.50    2.30
  -9  -2  -1   26.10    2.70
   9   2  -1   30.90    2.30
   9   2  -1   29.40    2.30
   9   2  -1   29.80    2.40
   9   2  -1   35.80    2.40
   9  -2  -1   32.10    2.40
   9   2   1   37.20    2.40
  -9  -2   1   33.50    2.10
   9   2   1   32.30    2.30
   9   2   1   32.40    2.60
   9  -2  -1   31.70    2.60
  -9  -2   1   28.00    2.70
  -9   2  -1   32.90    2.50
   9   2   1   29.70    2.40
   9   2   1   31.60    2.30
   9  -2  -1   30.70    2.20
  -9   2  -1   33.40    2.20
  -9  -2   1   29.80    2.20
 -10  -2  -1   23.70    1.90
  10   2  -1   27.30    2.00
 -10   2   1   28.10    2.20
  10  -2   1   24.20    2.20
  10   2  -1   26.00    1.90
  10   2  -1   28.90    2.00
 -10  -2  -1   29.20    1.90
 -10  -2  -1   29.40    1.70
  10  -2   1   30.80    2.10
  10   2  -1   31.80    2.20
  10  -2   1   27.80    2.00
 -10  -2   1   28.50    1.80
 -10  -2   1   27.20    2.10
  10  -2  -1   27.40    2.00
  10   2   1   26.10    2.10
 -10   2  -1   29.70    1.90
  10   2   1   27.50    1.90
 -10   2  -1   26.30    2.00
  10  -2  -1   26.40    2.30
  10  -2  -1   28.40    2.00
 -10  -2   1   25.80    1.80
  10   2   1   26.80    2.00
  11   2  -1    9.70    0.80
 -11   2   1   11.80    1.00
 -11  -2  -1    8.80    0.70
  11  -2   1    8.80    0.80
  11  -2   1   10.60    0.90
  11   2  -1   10.20    0.90
  11   2   1   11.00    1.00
  11   2   1    7.20    0.80
 -11   2  -1    9.20    0.80
 -11  -2   1   10.40    0.70
 -11   2  -1   10.60    1.00
   0  -3   1  933.51   51.29
   0  -3  -1 1019.10   51.49
   0   3   1 1068.29   51.99
   0  -3  -1 1063.69   51.39
   0   3   1  980.70   51.59
   0   3   1  959.60   51.29
   0  -3   1 1214.08   52.19
   0  -3  -1 1030.30   52.89
   0   3  -1 1052.09   52.79
   0   3   1 1011.50   50.79
   0  -3   1 1136.89   51.49
   0   3   1 1135.49   51.59
   0   3  -1 1120.59   51.79
   0   3  -1 1095.99   51.69
  -1  -3  -1 1609.84   77.79
  -1  -3  -1 1545.75   75.69
  -1   3   1 1411.66   75.59
   1  -3   1 1690.33   76.99
   1   3  -1 1529.85   76.69
  -1   3   1 1524.45   76.79
  -1   3   1 1623.14   76.49
   1   3  -1 1681.43   76.39
   1  -3   1 1508.45   75.29
   1  -3   1 1595.94   75.29
   1   3  -1 1592.24   76.59
  -1  -3  -1 1352.26   75.69
   1   3  -1 1684.33   77.49
   1   3  -1 1662.53   76.39
  -1  -3   1 1603.74   76.59
   1   3   1 1626.84   76.19
  -1   3  -1 1575.24   76.49
   1  -3  -1 1477.55   75.59
   1   3   1 1642.24   76.69
   1   3   1 1486.05   76.79
  -1   3  -1 1639.94   76.59
  -1   3  -1 1530.95   77.69
   1   3   1 1659.33   76.99
   1  -3  -1 1495.75   77.59
   1  -3  -1 1732.03   76.69
  -2  -3  -1 1371.66   67.69
   2   3  -1 1502.65   68.59
  -2  -3  -1 1458.95   68.19
   2  -3   1 1421.66   68.39
  -2   3   1 1460.85   67.69
   2   3  -1 1242.98   67.49
   2  -3   1 1360.96   66.69
  -2   3   1 1458.75   68.19
  -2  -3  -1 1245.88   68.49
  -2  -3  -1 1212.68   66.59
   2   3  -1 1335.87   67.69
  -2  -3  -1 1329.27   66.59
  -2  -3   1 1518.65   68.09
   2  -3  -1 1518.35   68.39
  -2   3  -1 1438.46   67.99
   2   3   1 1449.15   68.59
  -2   3  -1 1436.36   69.09
   2  -3  -1 1354.56   68.69
  -2   3  -1 1280.17   67.59
  -2  -3   1 1336.17   68.19
   2   3   1 1446.76   67.79
   3   3  -1 1390.36   70.09
  -3  -3  -1 1451.75   70.59
   3   3  -1 1441.06   69.89
  -3   3   1 1361.16   69.49
  -3  -3  -1 1442.56   70.49
   3   3  -1 1473.45   71.09
   3  -3   1 1524.55   70.89
  -3   3   1 1408.66   70.29
   3  -3   1 1350.26   68.29
  -3  -3  -1 1467.45   69.89
  -3  -3   1 1513.55   70.39
  -3  -3   1 1405.26   69.79
  -3   3  -1 1536.15   71.39
   3  -3  -1 1410.26   70.79
  -3   3  -1 1441.36   69.79
   3  -3  -1 1445.36   70.69
   3   3   1 1439.56   70.19
  -3   3  -1 1490.95   70.19
  -3  -3   1 1393.56   69.39
   3   3   1 1290.87   68.69
   3  -3  -1 1291.57   68.29
   4   3  -1  582.14   31.20
   4   3  -1  596.04   31.70
  -4   3   1  622.24   31.90
  -4  -3  -1  614.24   29.20
  -4  -3  -1  611.34   31.10
  -4  -3  -1  597.34   31.90
   4   3  -1  625.74   32.70
   4  -3   1  576.84   29.40
   4  -3   1  613.64   32.30
  -4   3   1  631.74   30.90
  -4   3  -1  626.24   32.50
   4   3   1  619.84   32.80
   4  -3  -1  604.24   31.80
  -4   3  -1  611.14   31.20
   4  -3  -1  689.93   32.80
   4   3   1  648.24   32.00
  -4  -3   1  539.65   29.00
  -4   3  -1  626.84   31.70
  -4  -3   1  543.65   30.40
   4  -3  -1  554.64   29.40
   5   3  -1  355.76   19.50
  -5  -3  -1  353.06   16.50
  -5  -3  -1  348.77   19.60
  -5   3   1  336.07   18.20
   5  -3   1  330.67   20.00
   5   3  -1  323.97   18.70
   5  -3   1  317.67   16.50
  -5  -3  -1  296.27   16.20
   5   3  -1  340.47   20.40
   5  -3   1  325.37   16.30
  -5   3   1  329.37   19.30
  -5  -3  -1  304.77   18.20
   5  -3   1  352.26   16.90
  -5   3  -1  337.77   19.20
   5  -3  -1  285.47   16.10
   5  -3  -1  334.27   16.80
  -5  -3   1  341.77   16.30
  -5   3  -1  360.26   18.70
   5   3   1  356.16   20.70
   5   3   1  341.27   19.40
  -5  -3   1  320.67   19.20
   5  -3  -1  337.37   20.10
  -6  -3  -1  295.87   17.30
  -6   3   1  311.97   15.10
   6   3  -1  303.17   15.40
  -6  -3  -1  313.67   15.40
   6  -3   1  310.17   15.30
   6   3  -1  322.37   15.30
  -6   3   1  312.47   15.40
   6   3  -1  281.47   15.20
   6   3  -1  303.27   15.40
   6   3  -1  307.97   15.40
  -6  -3  -1  299.37   15.00
   6   3  -1  328.07   18.80
   6  -3   1  300.77   15.70
  -6  -3   1  328.77   15.30
  -6   3  -1  283.97   15.10
   6  -3  -1  286.37   15.30
  -6   3  -1  307.47   15.40
   6   3   1  338.17   19.00
  -6   3  -1  289.97   17.50
   6   3   1  304.07   15.30
  -6  -3   1  302.17   15.00
   6   3   1  316.37   15.40
   6  -3  -1  320.97   15.80
   6  -3  -1  309.17   15.30
   6   3   1  302.27   15.40
   6   3   1  299.07   15.40
   6   3   1  291.27   15.20
   6   3   1  290.07   15.10
   7   3  -1  146.59    8.10
  -7   3   1  154.98    8.20
  -7  -3  -1  139.89    8.50
   7   3  -1  161.38    8.50
   7  -3   1  155.28    8.30
  -7  -3  -1  144.29    8.00
   7   3  -1  161.28    8.50
  -7  -3  -1  167.08    8.30
   7   3  -1  167.48    8.60
   7   3  -1  154.08    8.30
   7   3  -1  177.48    8.60
   7  -3   1  171.38    9.00
   7  -3   1  164.48    8.50
   7  -3   1  154.38    8.40
   7   3  -1  147.89   11.70
  -7   3   1  170.78    8.60
   7   3  -1  164.98    8.60
  -7  -3   1  144.59    8.50
   7   3   1  167.38    8.50
   7   3   1  169.18    8.30
   7  -3  -1  163.58    8.50
  -7   3  -1  161.98    8.60
   7   3   1  157.08    8.50
   7   3   1  144.39   11.80
  -7   3  -1  159.08    8.30
   7   3   1  163.18    8.60
   7   3   1  163.28    8.50
   7  -3  -1  150.38    8.40
   7  -3  -1  165.18    8.90
   7   3   1  168.88    8.60
  -7  -3   1  158.98    8.20
  -8   3   1  297.27   14.50
   8   3  -1  296.77   14.30
   8   3  -1  294.27   14.40
  -8  -3  -1  245.38   14.00
   8   3  -1  282.47   14.30
   8   3  -1  282.87   14.40
   8  -3   1  297.27   14.30
   8   3  -1  275.37   14.10
  -8  -3  -1  274.07   13.80
  -8   3   1  276.57   14.00
   8  -3   1  263.47   14.10
  -8  -3  -1  289.07   14.60
   8   3  -1  289.57   14.30
   8  -3   1  288.67   14.70
   8  -3   1  282.07   14.20
   8   3   1  280.67   14.20
  -8  -3   1  273.77   13.90
   8   3   1  278.27   14.30
  -8  -3   1  276.67   14.10
   8   3   1  276.77   14.30
   8   3   1  279.87   14.00
   8  -3  -1  290.47   14.30
   8   3   1  288.27   14.40
   8  -3  -1  261.67   14.70
   8   3   1  281.47   14.30
  -8  -3   1  289.97   14.50
  -8   3  -1  286.47   14.40
  -8   3  -1  291.37   14.10
  -8  -3   1  275.27   13.80
   8  -3  -1  272.47   14.20
   9   3  -1   21.00    2.10
  -9  -3  -1   21.10    2.30
  -9   3   1   21.50    1.60
   9   3  -1   19.30    2.00
  -9   3   1   20.20    1.80
   9  -3   1   17.40    1.70
   9   3  -1   19.40    1.80
   9   3  -1   21.70    1.80
  -9  -3  -1   20.30    1.60
   9   3  -1   20.80    1.60
   9  -3   1   19.20    2.20
   9  -3   1   19.50    1.80
  -9  -3  -1   19.40    1.70
   9   3  -1   21.20    1.80
  -9  -3  -1   19.60    1.70
  -9  -3   1   22.70    1.80
  -9   3  -1   19.90    1.60
   9   3   1   20.80    1.70
   9   3   1   20.90    2.00
   9   3   1   18.90    2.00
  -9  -3   1   19.20    1.40
   9  -3  -1   16.80    1.90
   9   3   1   17.10    1.90
   9  -3  -1   22.70    1.90
   9  -3  -1   23.20    2.30
   9   3   1   21.00    1.80
  -9  -3   1   20.20    2.20
  -9   3  -1   20.10    2.00
  10   3  -1   35.30    2.30
 -10  -3  -1   30.80    2.10
  10   3  -1   32.90    2.30
  10   3  -1   30.90    2.20
 -10   3   1   32.50    2.00
  10   3  -1   36.40    2.30
 -10  -3  -1   34.10    2.00
 -10  -3  -1   33.40    2.10
  10  -3   1   29.50    2.30
 -10   3   1   37.40    2.40
  10  -3   1   35.40    2.40
 -10   3  -1   36.50    2.30
  10   3   1   32.60    2.30
  10   3   1   32.50    2.30
 -10   3  -1   37.00    2.10
  10  -3  -1   34.80    2.20
  10  -3  -1   36.50    2.50
 -10  -3   1   34.00    2.20
  10   3   1   36.40    2.30
  10   3   1   36.30    2.50
  10   3   1   33.80    2.30
 -10  -3   1   35.50    2.10
   0  -4   1  314.27   17.40
   0   4  -1  344.57   19.60
   0   4   1  290.87   17.60
   0   4   1  316.67   16.90
   0  -4  -1  360.66   17.90
   0   4   1  298.77   18.00
   0   4  -1  365.46   18.40
   0   4  -1  362.26   18.30
   0   4   1  380.36   18.80
   0  -4   1  388.66   18.60
   0  -4   1  351.36   17.70
   0  -4  -1  365.46   20.00
  -1   4   1 1562.34   72.39
   1  -4   1 1615.94   72.49
   1   4  -1 1580.74   72.19
   1   4  -1 1577.04   72.19
  -1   4   1 1310.17   70.39
  -1   4   1 1347.57   71.69
   1   4  -1 1435.06   71.49
   1   4  -1 1474.45   71.69
  -1  -4  -1 1459.65   73.49
  -1  -4  -1 1479.35   70.99
  -1  -4   1 1526.35   73.29
  -1   4  -1 1592.14   73.89
  -1   4  -1 1537.65   72.09
   1  -4  -1 1652.33   72.09
   1   4   1 1461.95   72.09
   1   4   1 1496.45   72.39
   1  -4  -1 1324.17   73.29
   1   4   1 1424.26   71.19
   1   4   1 1304.47   71.79
  -1  -4   1 1594.14   71.99
  -1   4  -1 1241.48   71.59
   1  -4  -1 1362.56   70.19
  -2  -4  -1  138.69    8.60
   2   4  -1  144.29    9.10
  -2  -4  -1  139.39    9.70
   2   4  -1  141.79    8.30
   2  -4   1  130.99    6.90
  -2   4   1  139.09    8.50
  -2   4   1  144.59    9.00
   2  -4   1  132.89    9.00
   2   4  -1  138.39    8.40
   2  -4  -1  146.19   10.00
  -2   4  -1  120.89    8.40
   2   4   1  123.69    8.20
  -2  -4   1  138.59    9.30
  -2  -4   1  148.69    8.50
   2  -4  -1  135.59    8.80
   2   4   1  140.39    8.90
  -2  -4   1  141.19    8.70
   2  -4  -1  122.99    6.90
  -2   4  -1  126.59    8.50
   2   4   1  150.48    9.30
  -2   4  -1  143.99   10.10
   3   4  -1 3342.97  177.58
   3   4  -1 3774.62  179.28
  -3  -4  -1 3530.55  178.98
   3  -4   1 3477.35  178.88
  -3  -4  -1 3820.42  178.98
  -3   4   1 3861.31  178.78
  -3  -4  -1 3983.50  178.28
  -3   4   1 3748.53  177.98
   3  -4   1 3516.65  176.08
   3   4  -1 3562.04  178.18
  -3  -4   1 3704.63  177.68
   3   4   1 3967.30  179.58
   3   4   1 3673.23  178.18
  -3  -4   1 3549.15  178.48
   3  -4  -1 3950.70  179.18
  -3   4  -1 3624.64  178.08
  -3   4  -1 3783.72  178.48
   3  -4  -1 3582.94  179.58
  -3  -4   1 3793.22  178.68
  -3   4  -1 3762.92  180.08
   3  -4  -1 3568.54  176.18
   4  -4   1  779.42   39.80
  -4  -4  -1  829.22   39.30
  -4   4   1  833.62   41.60
   4  -4   1  851.91   43.10
  -4  -4  -1  866.81   41.80
   4   4  -1  770.12   41.30
   4  -4   1  829.72   39.60
  -4  -4  -1  824.82   42.70
  -4   4   1  819.32   42.50
   4   4  -1  842.02   42.30
   4   4  -1  755.82   42.90
   4  -4   1  760.42   39.30
   4  -4  -1  860.61   43.10
  -4   4  -1  857.91   42.40
   4  -4  -1  834.92   43.20
   4   4   1  797.92   43.40
   4  -4  -1  790.02   39.30
  -4   4  -1  853.81   41.80
  -4  -4   1  821.22   41.20
  -4  -4   1  818.42   42.30
  -4   4  -1  777.12   43.20
   4  -4  -1  784.12   39.80
   4   4   1  870.81   42.30
  -5  -4  -1  134.29    7.20
  -5  -4  -1  135.29    9.30
  -5   4   1  140.49    9.20
   5   4  -1  146.09   11.30
  -5   4   1  126.39    9.90
   5  -4   1  143.59    7.20
   5   4  -1  141.09   10.00
  -5  -4  -1  123.09   10.00
   5  -4   1  146.79    7.50
   5  -4   1  132.59   10.60
   5  -4   1  142.19    7.70
   5  -4  -1  134.29    7.40
  -5  -4   1  147.49    7.10
  -5  -4   1  143.19   10.20
   5  -4  -1  139.69   10.90
   5   4   1  138.89   11.10
   5   4   1  149.59   10.30
  -5   4  -1  147.79    9.60
   5  -4  -1  125.59    7.60
   5  -4  -1  135.39    7.10
  -6   4   1   74.09    4.20
  -6  -4  -1   82.19    4.60
   6   4  -1   76.09    4.50
   6   4  -1   73.59    4.60
  -6  -4  -1   67.39    6.80
   6   4  -1   70.89    4.20
   6   4  -1   75.49    4.60
  -6   4   1   79.49    4.70
  -6  -4  -1   75.79    4.20
   6  -4   1   72.89    4.20
   6  -4   1   85.99    5.00
   6   4  -1   77.29    7.30
   6   4  -1   80.39    4.60
   6  -4   1   75.69    4.50
   6   4  -1   76.79    4.50
   6  -4  -1   81.39    5.00
  -6   4  -1   69.99    4.10
  -6   4  -1   74.59    4.50
  -6   4  -1   73.79    6.50
   6   4   1   75.99    4.50
   6   4   1   77.29    4.30
   6   4   1   78.49    4.50
  -6   4  -1   81.19    4.70
  -6   4  -1   79.99    4.30
   6  -4  -1   78.39    4.60
   6   4   1   74.29    4.40
  -6  -4   1   76.39    4.40
   6   4   1   83.19    4.60
   6   4   1   70.49    4.50
   6  -4  -1   82.79    4.50
   6   4   1   72.19    7.10
   6  -4  -1   76.39    4.00
   7  -4   1  362.66   17.10
   7   4  -1  333.77   17.10
   7   4  -1  349.27   17.00
   7   4  -1  327.37   17.10
  -7  -4  -1  339.77   16.80
   7   4  -1  346.27   17.10
   7  -4   1  339.47   17.00
   7   4  -1  313.07   16.60
   7   4  -1  351.36   17.10
  -7   4   1  334.17   16.80
  -7   4   1  338.67   17.20
  -7  -4  -1  336.97   17.10
   7  -4   1  340.67   17.50
  -7  -4   1  349.67   17.10
   7  -4  -1  329.37   17.40
  -7  -4   1  335.97   16.70
   7   4   1  341.97   17.10
   7  -4  -1  328.27   16.90
   7  -4  -1  343.47   17.00
  -7   4  -1  334.57   16.80
   7   4   1  339.07   17.10
   7   4   1  348.37   16.80
   7   4   1  326.27   17.10
  -7   4  -1  337.97   17.10
   7   4   1  342.87   17.10
   7   4   1  343.47   17.00
   8  -4   1   30.20    2.60
   8  -4   1   31.10    2.20
  -8   4   1   28.40    2.20
   8   4  -1   33.80    2.50
   8   4  -1   30.40    2.50
   8   4  -1   30.90    2.40
  -8  -4  -1   29.90    2.00
  -8  -4  -1   31.70    2.50
  -8  -4  -1   32.90    2.30
   8   4  -1   28.00    2.40
   8  -4   1   32.60    2.50
  -8   4   1   30.40    2.40
   8   4  -1   30.60    2.40
   8   4   1   29.80    2.50
   8  -4  -1   31.80    2.30
   8   4   1   30.30    2.40
  -8   4  -1   28.80    2.40
   8  -4  -1   27.70    2.70
  -8   4  -1   30.60    2.20
  -8  -4   1   32.40    2.50
   8   4   1   30.70    2.40
  -8  -4   1   32.00    2.20
   8   4   1   31.10    2.40
   8  -4  -1   30.90    2.50
   8   4   1   30.70    2.40
   8   4   1   31.20    2.10
   9  -4   1   71.09    4.60
  -9  -4  -1   68.19    4.40
   9   4  -1   75.39    4.30
   9   4  -1   70.69    4.10
   9  -4   1   61.39    4.10
   9   4  -1   65.39    4.20
   9  -4   1   71.79    4.10
   9   4  -1   71.99    4.20
  -9   4   1   72.09    4.20
  -9  -4  -1   73.39    4.10
  -9  -4  -1   70.39    4.00
  -9  -4  -1   77.19    3.90
   9   4  -1   71.49    4.20
  -9   4   1   69.39    3.90
   9  -4  -1   71.29    4.10
  -9   4  -1   71.79    4.20
   9  -4  -1   74.49    4.20
   9   4   1   72.29    4.20
   9   4   1   74.39    4.30
   9  -4  -1   70.09    4.50
   9   4   1   71.99    4.20
  -9   4  -1   75.49    4.00
   9   4   1   72.69    4.20
  -9  -4   1   75.29    3.90
  -9  -4   1   71.99    4.00
  -9  -4   1   69.89    4.30
   9   4   1   59.49    4.20
 -10  -4  -1   99.19    5.20
  10  -4   1   92.79    5.60
  10   4  -1  104.79    5.50
 -10  -4  -1   97.99    5.10
  10   4  -1  107.29    5.50
 -10   4   1  105.19    5.50
  10   4  -1  107.59    5.40
 -10  -4  -1   98.59    5.30
  10  -4   1   92.49    5.40
  10   4  -1  104.49    5.50
  10   4  -1  111.79    5.50
  10   4   1  108.49    5.50
 -10  -4   1  106.59    5.20
 -10   4  -1   96.79    5.30
  10   4   1  106.09    5.50
  10  -4  -1   99.79    5.70
 -10   4  -1  105.39    5.30
  10   4   1  101.49    5.40
  10   4   1   98.89    5.40
  10  -4  -1  106.79    5.40
  10   4   1   99.29    5.40
 -10  -4   1   98.49    5.30
   0  -5   1  160.08    9.70
   0   5   1  158.48    9.70
   0  -5   1  155.48   11.10
   0   5  -1  160.38    9.80
   0  -5  -1  159.28   11.40
   0  -5  -1  135.29    7.50
   0   5   1  145.89    8.80
   0   5   1  160.78   10.10
   0  -5  -1  150.78    9.00
  -1   5   1  179.38   11.00
   1   5  -1  185.98   10.80
  -1   5   1  175.68   10.50
   1  -5   1  180.18   10.90
   1  -5   1  145.09    8.30
   1   5  -1  172.78   10.40
   1  -5   1  182.58   12.30
  -1  -5  -1  175.58   12.10
   1   5  -1  165.88    9.70
   1   5   1  173.18   10.60
   1  -5  -1  152.98   10.20
   1   5   1  154.38    9.40
  -1   5  -1  177.18   10.70
   1   5   1  140.09   10.10
  -1   5  -1  189.58   10.70
   1   5   1  185.68   11.10
   1  -5  -1  171.58    8.50
  -1  -5   1  158.78   10.30
  -1  -5   1  171.38   10.30
   1  -5  -1  196.68   12.70
  -1  -5   1  161.18   11.70
  -2   5   1  122.19    7.90
   2  -5   1  116.09    9.50
   2   5  -1  117.29    7.70
  -2  -5  -1  119.59    8.00
   2   5  -1  119.69    8.40
   2  -5   1  111.89    8.30
  -2   5   1  121.99    8.40
  -2  -5  -1  117.99    9.30
   2   5  -1  103.99    7.40
   2  -5   1  115.59    6.00
  -2   5   1  112.19    6.20
  -2  -5   1  107.39    8.00
  -2  -5   1  109.99    7.50
   2  -5  -1  105.69    8.00
  -2  -5   1  103.59    8.70
   2   5   1  121.59    8.40
   2   5   1  121.59    8.50
   2  -5  -1  118.59    9.60
  -2   5  -1  117.69    8.10
  -2   5  -1  109.99    6.20
   2   5   1  108.29    7.20
   2  -5  -1  117.19    6.00
  -2   5  -1  125.79    8.10
   3   5  -1  131.39    9.60
   3   5  -1  126.69    8.80
  -3   5   1  133.89    9.40
  -3   5   1  131.99    8.80
   3  -5   1  123.39    6.50
   3  -5   1  121.89   10.20
  -3  -5  -1  146.09    9.10
   3  -5   1  127.79    9.50
  -3  -5  -1  120.29    9.20
  -3   5   1  120.39    6.90
   3  -5   1  131.49    6.80
  -3  -5  -1  122.79    9.80
  -3   5  -1  125.59    6.90
   3  -5  -1  128.79   10.30
   3  -5  -1  117.79    9.20
  -3  -5   1  127.29    9.20
   3  -5  -1  142.09    6.90
   3   5   1  146.09   10.10
  -3   5  -1  143.19    9.10
  -3   5  -1  125.99    7.10
  -3   5  -1  130.69    9.10
   3  -5  -1  115.39    6.90
  -3  -5   1  135.89    8.60
   3  -5  -1  120.39    6.60
   3   5   1  126.39    8.60
   4   5  -1   34.40    4.30
  -4   5   1   33.50    4.50
  -4   5   1   29.80    3.60
   4  -5   1   32.60    4.80
  -4   5   1   32.20    2.30
   4  -5   1   31.60    2.10
  -4  -5  -1   30.50    4.60
   4  -5   1   34.80    2.40
   4  -5   1   25.40    4.30
  -4  -5  -1   32.40    2.00
   4  -5   1   31.40    2.50
   4   5  -1   29.70    4.50
  -4  -5  -1   32.30    4.00
  -4  -5   1   29.40    3.90
  -4   5  -1   31.00    3.80
   4  -5  -1   35.40    2.20
  -4  -5   1   27.40    3.30
  -4   5  -1   30.00    2.30
   4  -5  -1   33.80    2.40
   4   5   1   33.50    4.20
   4   5   1   31.20    4.60
   4  -5  -1   34.40    2.50
   4  -5  -1   27.70    4.80
  -4   5  -1   31.50    4.00
   4  -5  -1   27.20    4.50
  -5  -5  -1    6.40    2.10
   5  -5   1    5.60    1.10
   5  -5   1    6.80    1.00
   5   5  -1    7.10    1.20
  -5   5   1    4.70    0.90
   5   5  -1    6.10    1.00
   5   5  -1    4.60    0.80
  -5   5   1    3.20    1.70
   5   5  -1    5.20    1.00
   5  -5   1    6.50    1.30
  -5  -5  -1    5.30    0.90
  -5   5   1    5.40    1.00
   5  -5   1    3.90    1.00
   5   5  -1    5.50    2.50
   5   5  -1    6.60    1.00
  -5   5   1    7.70    1.30
   5   5  -1    9.20    1.30
  -5   5  -1    5.90    0.90
   5   5   1    5.10    1.10
   5   5   1    5.40    1.00
   5   5   1    6.40    1.00
   5   5   1    4.30    2.30
  -5   5  -1    5.40    0.80
   5  -5  -1    5.90    1.30
  -5  -5   1    5.10    0.80
   5   5   1    5.90    0.80
   5  -5  -1    7.40    1.00
  -5   5  -1    6.40    1.00
   5   5   1    4.30    1.00
  -5   5  -1    6.30    0.90
   5  -5  -1    5.70    1.10
  -5   5  -1    6.30    2.40
  -5   5  -1    5.80    1.20
   5  -5  -1    5.10    0.80
   6   5  -1  129.89    7.20
   6  -5   1  132.09    7.90
   6   5  -1  137.39    7.40
   6  -5   1  137.79    7.30
   6   5  -1  150.48    7.70
   6   5  -1  148.59    7.60
   6   5  -1  139.59    7.50
   6  -5   1  138.79    7.40
  -6   5   1  138.79    7.60
  -6   5   1  143.99    7.30
  -6  -5  -1  147.89    7.60
  -6  -5  -1  132.69    7.20
   6   5  -1  142.39    7.60
   6   5   1  136.39    7.60
   6   5   1  119.79   10.40
   6   5   1  149.19    7.60
   6   5   1  138.79    7.30
   6   5   1  147.09    7.60
   6  -5  -1  138.69    7.00
   6  -5  -1  136.99    7.40
   6  -5  -1  147.19    8.00
  -6   5  -1  139.49    7.60
  -6   5  -1  134.79    7.30
  -6   5  -1  141.79    7.70
  -6  -5   1  149.19    7.40
   6   5   1  147.19    7.70
   6   5   1  127.79    7.30
   6  -5  -1  138.29    7.50
  -6   5  -1  130.69   10.20
  -6   5  -1  130.09    7.20
  -7   5   1   78.59    4.60
  -7  -5  -1   75.89    4.20
  -7  -5  -1   78.99    4.60
  -7   5   1   74.89    4.20
   7  -5   1   75.09    3.90
   7  -5   1   77.09    4.60
   7   5  -1   80.89    4.60
   7  -5   1   65.79    4.70
   7   5  -1   74.09    4.60
   7   5  -1   77.09    4.50
   7   5  -1   73.19    4.20
   7   5  -1   81.19    4.60
   7   5  -1   75.29    4.60
   7  -5   1   79.49    4.50
  -7   5  -1   72.69    4.30
  -7  -5   1   69.79    4.10
  -7  -5   1   79.99    4.60
   7  -5  -1   69.79    4.40
  -7   5  -1   74.59    4.50
   7   5   1   75.29    4.60
   7   5   1   72.99    4.50
   7   5   1   76.59    4.60
   7   5   1   72.49    4.70
   7   5   1   72.59    4.20
   7  -5  -1   70.39    4.80
   7  -5  -1   74.69    4.60
   7   5   1   73.59    4.40
  -8  -5  -1   26.90    1.90
   8   5  -1   24.40    1.80
   8   5  -1   25.50    2.00
   8  -5   1   22.20    2.10
   8  -5   1   24.80    2.30
   8   5  -1   21.70    2.00
   8   5  -1   24.30    2.30
   8   5  -1   22.20    2.00
   8   5  -1   26.00    2.00
  -8   5   1   25.50    1.80
  -8   5   1   26.50    2.10
  -8  -5  -1   22.70    1.70
   8  -5   1   26.40    2.20
  -8  -5  -1   25.70    2.30
   8   5   1   21.20    2.10
  -8   5  -1   23.90    1.80
   8   5   1   26.30    2.20
  -8  -5   1   25.80    2.10
   8  -5  -1   23.70    2.10
   8   5   1   22.10    2.00
   8   5   1   24.30    2.00
   8  -5  -1   22.90    1.90
   8   5   1   22.70    2.00
   8  -5  -1   23.10    2.40
  -8  -5   1   26.10    1.90
  -8   5  -1   23.70    2.10
   8   5   1   24.70    1.70
   9  -5   1   14.90    1.40
  -9   5   1   13.10    1.10
   9   5  -1   12.80    1.30
   9   5  -1   14.00    1.50
   9   5  -1   12.60    1.50
   9  -5   1   13.10    1.80
   9   5  -1   12.80    1.40
   9  -5   1   14.30    1.30
   9   5  -1   11.60    1.50
  -9  -5  -1   11.80    1.10
  -9  -5  -1   13.60    1.10
  -9  -5  -1   12.70    1.70
  -9   5   1   11.70    1.40
  -9  -5  -1   13.90    1.40
   9   5   1   13.50    1.40
   9   5   1   12.20    1.40
  -9  -5   1   14.00    1.20
   9  -5  -1   14.30    1.60
   9   5   1   13.20    1.40
   9   5   1   15.60    1.70
  -9   5  -1   14.10    1.20
  -9  -5   1   15.10    1.30
   9   5   1   14.10    1.30
   9  -5  -1   14.50    1.30
  -9  -5   1   10.80    1.50
   9  -5  -1   12.40    1.50
  -9   5  -1   13.90    1.30
 -10  -5  -1   44.20    2.20
 -10   5   1   39.60    2.40
  10   5  -1   42.10    2.40
  10  -5   1   43.30    2.40
  10   5  -1   45.00    2.50
  10   5  -1   45.40    2.50
  10   5  -1   38.60    2.40
 -10   5   1   38.20    2.20
 -10  -5  -1   49.50    2.60
  10   5   1   44.10    2.50
 -10  -5   1   37.00    2.20
  10   5   1   45.60    2.40
  10   5   1   37.50    2.30
  10   5   1   32.50    2.40
  10   5   1   41.20    2.50
 -10   5  -1   35.70    2.30
  10  -5  -1   42.90    2.40
   0  -6  -1   20.00    1.40
   0  -6   1   19.20    3.80
   0   6  -1   19.90    3.00
   0   6  -1   18.20    1.80
   0  -6  -1   21.10    4.00
   0   6  -1   23.90    3.00
   0  -6   1   19.00    2.80
   0   6   1   18.80    1.80
   0   6   1   17.60    3.10
   0   6   1   19.80    3.10
   1  -6   1  160.88    7.90
  -1   6   1  170.38   10.50
   1   6  -1  152.58    8.30
  -1  -6  -1  165.08   12.60
  -1   6   1  132.09   10.50
   1   6  -1  169.78   10.40
   1  -6   1  148.69   10.50
  -1  -6  -1  154.18    7.90
   1  -6   1  155.38   12.30
  -1   6   1  158.68    8.40
   1  -6  -1  159.78   12.50
   1  -6  -1  161.88    8.00
  -1   6  -1  144.09    8.30
  -1   6  -1  165.88    8.40
   1   6   1  158.58    8.30
  -1   6  -1  163.88   10.40
  -1   6  -1  153.18   10.50
   1   6   1  147.09   10.70
   1   6   1  173.98   10.60
  -1  -6   1  143.19   11.90
  -2   6   1  556.44   29.20
  -2   6   1  503.95   25.80
   2  -6   1  500.85   28.70
   2  -6   1  546.05   25.50
  -2  -6  -1  521.15   30.60
  -2  -6  -1  558.04   28.50
  -2   6   1  552.04   28.30
   2  -6   1  503.65   30.60
   2   6  -1  515.75   25.70
   2  -6  -1  512.85   25.30
  -2   6  -1  569.34   28.50
  -2   6  -1  540.95   26.00
   2   6   1  473.75   28.20
  -2  -6   1  506.75   30.00
   2  -6  -1  583.94   25.70
   2   6   1  500.15   25.70
  -2   6  -1  486.05   25.80
  -2   6  -1  523.55   28.50
  -2  -6   1  526.95   28.10
   2  -6  -1  516.75   30.90
  -2  -6   1  495.95   28.40
  -3   6   1   79.39    7.40
  -3   6   1   87.69    5.20
  -3  -6  -1   95.99    7.50
   3  -6   1   88.59    5.00
  -3   6   1  100.19    7.30
  -3  -6  -1   85.19    7.70
   3  -6   1   85.19    7.70
   3  -6   1   89.09    4.70
   3  -6   1   74.79    8.30
   3   6  -1   86.09    6.80
   3  -6  -1   80.39    4.70
  -3  -6   1   84.49    7.50
  -3   6  -1   99.89    5.10
   3  -6  -1   91.59    5.00
  -3   6  -1   95.19    5.40
  -3  -6   1   83.19    6.90
   3  -6  -1   90.59    5.20
  -3   6  -1   89.59    5.20
  -3   6  -1   92.19    7.30
   3  -6  -1   80.29    8.60
   3   6   1   85.49    5.00
   3   6   1   80.99    7.60
   3  -6  -1   86.79    7.60
   4   6  -1   32.50    2.20
  -4   6   1   39.60    2.50
  -4   6   1   37.20    2.70
  -4   6   1   33.70    2.40
   4   6  -1   34.30    2.60
  -4   6   1   39.60    2.70
   4   6  -1   31.80    4.60
   4   6  -1   32.30    2.50
  -4  -6  -1   31.80    4.10
  -4   6   1   38.00    4.40
  -4   6   1   34.70    2.60
   4  -6   1   36.70    2.90
   4   6  -1   36.20    2.50
  -4  -6  -1   36.10    2.30
   4  -6   1   37.10    2.40
  -4   6   1   38.80    2.60
   4   6  -1   35.90    2.60
  -4   6   1   33.60    2.30
   4  -6   1   37.40    2.70
   4  -6  -1   42.40    2.80
   4   6   1   40.00    2.40
   4  -6  -1   43.30    2.90
   4   6   1   38.80    2.60
   4   6   1   37.90    2.70
  -4   6  -1   35.60    2.90
  -4   6  -1   39.90    2.40
   4   6   1   31.40    4.40
  -4   6  -1   39.50    2.70
  -4   6  -1   32.40    2.40
  -4   6  -1   36.40    2.50
   4  -6  -1   41.20    2.60
  -4   6  -1   36.00    2.40
   4   6   1   37.20    2.30
  -4   6  -1   36.90    2.40
  -4   6  -1   37.10    4.50
   4   6   1   34.80    2.70
   4   6   1   29.80    2.30
   5   6  -1    8.90    2.70
   5   6  -1    9.80    1.30
   5  -6   1    9.30    1.50
  -5   6   1    9.90    1.20
   5   6  -1    7.80    1.00
  -5   6   1    9.10    1.40
   5   6  -1    8.40    1.20
   5   6  -1    9.80    1.20
   5  -6   1   13.00    1.50
  -5   6   1    7.50    1.10
  -5   6   1    4.80    2.50
   5  -6   1    9.80    1.20
   5  -6   1    9.30    1.60
  -5  -6  -1    6.60    2.60
   5   6  -1    8.80    1.30
  -5  -6  -1   10.20    1.20
  -5   6   1    9.00    1.20
  -5   6   1   11.30    1.50
   5   6   1    8.40    1.30
   5   6   1    9.70    1.40
  -5   6  -1    9.40    1.30
   5   6   1    8.50    1.00
  -5   6  -1    6.90    1.20
   5  -6  -1    6.40    1.10
  -5   6  -1   10.60    1.50
   5   6   1   10.50    1.30
   5  -6  -1   11.00    1.40
   5  -6  -1    8.10    1.40
  -5   6  -1    8.30    1.10
  -5   6  -1    8.80    1.10
  -5   6  -1    9.20    1.30
  -5   6  -1    6.90    2.50
   5   6   1    8.90    1.20
   5   6   1    6.80    2.70
   5   6   1   10.00    1.20
  -5   6  -1    8.60    1.10
   5  -6  -1   10.10    1.40
  -6  -6  -1  188.18    8.80
   6   6  -1  168.58    8.90
   6   6  -1  170.98    9.00
  -6  -6  -1  172.78    8.90
   6  -6   1  165.98    9.40
  -6   6   1  167.38    8.70
   6   6  -1  155.48    8.50
   6   6  -1  163.78    8.90
   6  -6   1  168.88    8.70
  -6   6   1  166.68    9.00
   6   6  -1  153.88    8.70
   6  -6   1  163.08    8.80
  -6   6   1  160.68    8.70
   6   6  -1  163.38    9.00
   6   6   1  167.18    9.00
  -6   6  -1  173.28    9.10
   6   6   1  180.38    9.10
  -6   6  -1  163.98    8.80
  -6  -6   1  170.78    8.70
   6  -6  -1  170.58    9.40
   6  -6  -1  175.98    9.00
   6  -6  -1  170.18    8.40
   6  -6  -1  168.78    8.80
   6  -6  -1  157.58    8.50
  -6   6  -1  171.88    8.70
  -6   6  -1  154.98    8.60
   6   6   1  169.18    8.60
  -6   6  -1  163.08    8.60
   6   6   1  173.78    9.10
   6   6   1  170.78    8.90
   7   6  -1   53.09    3.60
  -7  -6  -1   54.59    3.30
   7  -6   1   59.79    3.60
   7  -6   1   60.59    3.60
   7   6  -1   51.89    3.10
   7   6  -1   57.49    3.60
  -7   6   1   55.59    3.30
   7   6  -1   54.69    3.60
   7  -6   1   53.09    3.90
  -7   6   1   56.79    3.70
   7   6  -1   58.19    3.60
   7  -6   1   57.99    3.00
  -7  -6  -1   58.59    3.60
   7   6  -1   52.29    3.30
   7   6   1   52.99    3.50
   7   6   1   54.29    3.70
  -7  -6   1   52.39    3.20
   7   6   1   56.49    3.30
   7  -6  -1   54.29    2.90
   7  -6  -1   55.99    4.00
   7  -6  -1   55.89    3.50
  -7   6  -1   53.39    3.50
   7   6   1   58.29    3.60
   7  -6  -1   52.49    3.50
   7   6   1   54.79    3.60
  -7  -6   1   59.39    3.60
  -7   6  -1   55.99    3.40
  -7   6  -1   56.19    3.30
   8   6  -1   23.10    2.10
  -8   6   1   23.30    1.90
   8  -6   1   24.20    1.90
   8  -6   1   24.30    2.40
   8   6  -1   25.80    1.90
  -8  -6  -1   22.00    2.10
   8   6  -1   22.60    2.10
   8   6  -1   23.70    1.90
   8   6  -1   20.80    2.00
  -8   6   1   28.60    1.90
  -8  -6  -1   23.40    1.80
  -8  -6  -1   22.80    1.60
   8  -6   1   23.40    2.00
   8  -6  -1   20.00    1.80
   8   6   1   23.60    1.60
   8   6   1   23.50    2.20
  -8   6  -1   24.70    2.00
  -8  -6   1   22.10    1.70
  -8   6  -1   24.70    1.70
  -8  -6   1   21.20    1.90
   8  -6  -1   24.10    2.20
   8   6   1   25.00    1.90
   8  -6  -1   23.20    1.90
   8   6   1   23.10    1.90
   8   6   1   24.80    2.10
  -9  -6  -1   80.39    4.40
  -9   6   1   85.49    4.40
   9   6  -1   90.79    4.70
   9   6  -1   94.29    4.80
  -9  -6  -1   85.49    4.50
   9   6  -1   77.69    4.40
   9  -6   1   73.99    4.50
   9   6  -1   92.69    4.70
   9   6  -1   88.49    4.60
  -9  -6  -1   75.19    4.30
   9  -6   1   77.79    4.80
  -9   6   1   85.59    4.60
  -9  -6   1   89.49    4.30
  -9  -6   1   84.29    4.40
   9  -6  -1   72.39    4.40
  -9   6  -1   82.79    4.40
   9  -6  -1   88.09    4.60
   9   6   1   87.89    4.70
   9   6   1   89.79    4.70
   9   6   1   85.19    4.60
   9   6   1   91.09    4.70
   9  -6  -1   83.19    4.90
  -9   6  -1   75.59    4.50
   0   7  -1    9.70    2.80
   0   7   1   12.10    1.40
   0   7   1   12.90    1.20
   0   7  -1   13.20    1.30
   0   7   1   13.30    3.10
   0   7  -1   14.20    1.40
   0   7   1   12.40    1.30
   0   7  -1   12.80    1.40
   0   7   1   15.20    1.70
   0   7   1   10.00    1.40
   0   7  -1   13.80    3.00
   0   7   1   15.40    1.30
   0   7  -1   10.30    1.20
   0  -7  -1   13.80    1.20
   0   7  -1   10.80    1.50
  -1   7   1   41.40    4.90
   1   7  -1   37.20    2.50
   1   7  -1   38.50    4.60
  -1   7   1   40.30    2.70
   1   7  -1   40.00    2.50
  -1   7   1   41.50    3.00
  -1   7   1   41.50    2.60
   1   7  -1   42.60    3.00
   1   7  -1   44.80    2.90
   1  -7   1   43.70    2.50
   1   7  -1   38.30    2.60
  -1  -7  -1   42.00    5.10
  -1   7   1   40.10    2.70
  -1   7   1   40.30    2.50
  -1   7   1   39.30    2.50
  -1  -7  -1   39.80    2.40
   1   7   1   35.40    2.60
   1   7   1   41.20    2.60
   1  -7  -1   41.80    2.60
  -1   7  -1   39.20    2.60
  -1   7  -1   37.40    2.80
   1   7   1   37.40    2.60
  -1   7  -1   41.70    3.00
  -1   7  -1   37.90    2.50
  -1   7  -1   40.60    4.90
  -1   7  -1   42.10    2.60
   1   7   1   36.50    2.70
  -1   7  -1   35.80    2.80
   1   7   1   39.00    2.50
  -1   7  -1   40.60    2.60
   1   7   1   40.00    2.80
  -2   7   1  107.69    5.70
  -2  -7  -1  103.89    8.60
  -2   7   1  105.99    6.00
  -2   7   1  115.29    6.00
  -2   7   1  119.59    6.30
  -2   7   1  109.39    5.80
   2   7  -1  108.59    6.10
   2   7  -1  104.39    5.70
   2  -7   1  118.79    5.90
   2  -7   1  103.89    5.60
   2   7  -1  104.19    5.90
  -2   7   1  111.69    5.90
   2   7  -1   98.89    5.70
  -2   7   1  107.89    8.40
  -2   7   1  100.89    6.00
   2   7  -1  100.89    5.70
  -2  -7  -1  100.79    5.60
  -2   7  -1  109.99    5.90
   2  -7  -1  115.69    6.00
  -2   7  -1  111.79    5.80
  -2   7  -1   97.99    5.90
   2  -7  -1  111.29    5.70
   2   7   1  107.49    6.00
  -2   7  -1  106.29    5.70
  -2   7  -1  100.59    5.80
  -2  -7   1  106.59    8.30
  -2   7  -1  107.69    6.30
  -2   7  -1  117.09    6.30
   2   7   1  106.49    6.00
   2   7   1  104.49    5.80
   2   7   1  103.09    5.70
  -2   7  -1  104.09    6.10
   2   7   1  110.09    6.10
  -2   7  -1  111.39    8.60
   2   7   1  109.69    5.80
  -3  -7  -1   17.40    1.40
   3   7  -1   22.00    1.70
  -3   7   1   21.80    2.00
  -3   7   1   18.60    1.60
   3   7  -1   20.00    1.50
   3   7  -1   18.40    1.80
  -3   7   1   20.80    1.70
   3  -7   1   19.00    1.50
   3  -7   1   19.60    1.90
  -3   7   1   19.30    1.80
  -3   7   1   13.50    3.20
  -3  -7  -1   18.50    3.50
   3   7  -1   17.50    1.40
   3  -7   1   15.90    1.70
  -3   7   1   19.10    1.90
  -3   7   1   18.80    1.60
  -3   7   1   20.00    1.90
   3  -7  -1   18.40    1.60
   3  -7  -1   17.60    1.90
   3  -7  -1   19.40    1.80
  -3   7  -1   20.00    1.80
   3   7   1   18.40    1.70
  -3   7  -1   18.00    2.30
   3   7   1   18.10    1.70
  -3   7  -1   19.70    1.60
  -3   7  -1   21.40    1.90
   3   7   1   20.40    1.80
   3   7   1   18.80    1.90
  -3   7  -1   18.30    1.80
   3   7   1   17.90    1.60
   3   7   1   19.40    1.50
   3   7   1   17.70    1.70
  -3  -7   1   18.70    3.60
  -3   7  -1   19.80    3.80
  -3   7  -1   17.20    1.70
  -4   7   1  111.89    6.40
   4   7  -1  108.59    6.20
  -4   7   1  108.69    5.90
  -4   7   1  108.29    6.10
  -4   7   1  116.89    6.30
   4  -7   1  110.59    6.30
  -4  -7  -1   87.89    8.20
   4   7  -1  106.89    6.10
  -4   7   1  111.29    6.00
   4  -7   1  110.19    6.50
  -4   7   1  110.79    6.00
   4   7  -1  108.69    6.10
   4   7  -1  107.29    5.90
   4  -7   1  113.59    6.00
  -4   7   1  114.99    6.40
  -4  -7  -1  106.59    5.90
   4   7   1  113.29    6.30
   4   7   1  111.59    6.20
  -4   7  -1  103.09    6.00
   4  -7  -1  120.49    6.10
   4   7   1  113.89    6.20
  -4   7  -1  107.69    5.90
  -4   7  -1  105.29    6.10
   4  -7  -1  118.49    6.40
  -4   7  -1  111.29    6.40
   4   7   1  111.69    5.90
   4   7   1  105.49    5.90
   4  -7  -1  113.39    6.40
  -4   7  -1  113.39    6.10
  -4   7  -1  115.89    6.00
  -4   7  -1  115.19    6.50
   5  -7   1    3.70    1.10
   5   7  -1    1.40    0.70
  -5  -7  -1    1.00    0.80
   5   7  -1    2.50    0.80
  -5   7   1    0.90    0.70
   5   7  -1    1.60    0.50
   5  -7   1    1.80    1.10
  -5   7   1    2.60    1.00
  -5   7   1    1.30    0.80
   5  -7   1    3.90    1.30
   5   7  -1    2.30    0.80
  -5   7   1    1.10    0.60
   5  -7   1    1.20    0.60
   5   7  -1    0.80    0.80
  -5   7   1    1.70    0.70
  -5   7  -1    1.40    1.00
   5  -7  -1    1.90    0.80
   5   7   1    1.50    0.90
  -5   7  -1    1.60    0.60
   5   7   1    3.30    0.70
   5   7   1    3.20    0.80
   5  -7  -1    1.30    0.80
  -5   7  -1    1.30    0.80
  -5   7  -1    1.00    0.60
   5   7   1    1.90    0.70
   5   7   1    1.90    0.70
  -5   7  -1    1.30    0.90
   5  -7  -1    1.90    0.70
   5  -7  -1    0.70    0.90
  -5   7  -1    1.80    0.80
  -5   7  -1    1.40    0.70
   6  -7   1   92.49    5.50
  -6  -7  -1   85.79    5.00
  -6   7   1   89.09    4.90
   6   7  -1   83.89    4.70
  -6   7   1   86.79    4.80
   6   7  -1   87.69    5.10
  -6   7   1   91.79    5.10
   6  -7   1   85.09    4.90
   6   7  -1   88.49    4.90
   6   7  -1   88.09    5.10
   6   7  -1   89.19    5.10
   6  -7   1   86.79    4.80
   6  -7  -1   86.39    5.00
   6  -7  -1   80.69    4.70
  -6   7  -1   85.19    4.90
  -6   7  -1   87.29    4.80
  -6   7  -1   86.89    4.80
   6   7   1   87.89    5.10
   6   7   1   84.39    4.70
  -6   7  -1   83.49    5.20
   6  -7  -1   86.79    4.60
  -6  -7   1   81.49    4.80
   6   7   1   88.09    4.90
   6   7   1   84.09    5.10
   6  -7  -1   90.09    5.40
   6   7   1   88.09    5.20
  -6   7  -1   83.69    4.80
   7  -7   1   78.69    4.70
   7   7  -1   73.39    4.40
  -7  -7  -1   73.29    4.00
   7  -7   1   76.79    3.80
   7   7  -1   76.49    4.30
   7  -7   1   73.69    4.30
  -7   7   1   78.69    4.40
  -7  -7  -1   71.29    4.30
   7   7  -1   76.69    4.40
   7   7  -1   78.59    4.30
   7  -7   1   76.49    4.20
  -7   7   1   79.99    4.10
   7   7   1   72.89    4.20
  -7  -7   1   70.29    4.20
   7  -7  -1   80.79    4.60
  -7   7  -1   70.29    4.20
   7   7   1   62.29    4.20
  -7   7  -1   63.19    4.00
   7   7   1   69.89    4.00
  -7   7  -1   68.29    4.00
   7  -7  -1   66.39    4.00
   7   7   1   67.29    4.30
   7  -7  -1   73.19    3.70
   7  -7  -1   64.99    4.30
   7   7   1   72.19    4.40
   8   7  -1   40.60    2.60
   8  -7   1   39.50    2.50
   8   7  -1   39.10    2.50
   8   7  -1   39.20    2.50
  -8   7   1   37.90    2.50
  -8   7   1   39.00    2.30
  -8  -7  -1   39.50    2.40
   8  -7   1   38.60    2.40
   8  -7   1   41.50    2.80
   8   7  -1   40.20    2.60
   8   7   1   43.40    2.70
  -8   7  -1   38.10    2.40
  -8  -7   1   36.20    2.30
   8   7   1   41.80    2.70
   8  -7  -1   39.90    2.50
   8   7   1   37.90    2.20
   8   7   1   38.70    2.60
   8  -7  -1   36.20    2.30
   8  -7  -1   36.00    2.70
   8   7   1   37.80    2.40
  -8   7  -1   33.00    2.40
   9  -7   1   23.40    1.40
  -9   7   1   22.60    1.30
   9   7  -1   23.20    1.60
   9   7  -1   18.20    1.40
   9   7  -1   22.60    1.50
   9   7  -1   16.70    1.50
  -9   7   1   20.30    1.40
   9  -7   1   20.40    1.40
  -9  -7  -1   17.60    1.20
  -9  -7   1   20.60    1.20
   9   7   1   23.00    1.50
   9  -7  -1   22.10    1.50
   9   7   1   23.70    1.60
  -9   7  -1   23.40    1.40
   9   7   1   21.50    1.50
   0   8   1    9.20    2.80
   0   8  -1   13.70    1.40
   0   8   1   14.20    1.60
   0   8   1   14.50    1.50
   0   8  -1   14.20    1.60
   0   8  -1   14.90    1.70
   0   8   1   15.80    1.50
   0   8  -1   14.50    1.60
   0   8   1   15.40    1.50
   0   8  -1   14.20    1.50
   0   8  -1   10.10    2.90
   0   8  -1   15.20    1.50
   0   8   1   16.10    1.60
   0  -8  -1   14.20    1.40
   0   8   1   14.70    1.40
   0  -8   1   13.10    1.20
  -1   8   1   39.70    2.80
  -1   8   1   35.10    5.20
  -1   8   1   35.50    2.70
   1  -8   1   42.40    2.60
   1   8  -1   36.60    2.60
   1   8  -1   38.30    2.50
   1   8  -1   33.90    2.60
   1   8  -1   37.30    2.50
   1   8  -1   36.10    2.40
  -1   8   1   36.90    2.60
  -1  -8  -1   31.80    5.00
  -1   8   1   34.50    2.80
  -1   8   1   38.80    2.60
   1   8  -1   36.50    2.80
  -1   8   1   37.90    2.50
  -1  -8  -1   38.60    2.50
  -1   8  -1   43.70    2.60
   1   8   1   36.20    2.70
   1  -8  -1   40.10    2.70
  -1   8  -1   39.50    2.50
  -1   8  -1   38.40    3.10
   1   8   1   33.50    2.50
   1  -8  -1   35.70    2.40
   1   8   1   37.60    2.50
   1   8   1   38.50    2.90
  -1   8  -1   37.70    2.90
  -1   8  -1   36.30    2.60
   1   8   1   40.20    2.70
   1   8   1   38.80    2.50
  -1   8  -1   39.30    2.60
  -1   8  -1   36.50    2.50
  -1   8  -1   34.60    4.80
  -2   8   1   23.80    2.10
  -2   8   1   21.60    1.80
   2   8  -1   21.60    1.60
  -2   8   1   21.00    1.80
   2   8  -1   21.00    1.80
  -2   8   1   20.70    1.70
   2  -8   1   19.60    1.60
  -2  -8  -1   22.20    1.60
   2   8  -1   20.40    1.70
   2   8  -1   17.90    2.00
   2  -8   1   23.70    1.90
  -2   8   1   21.60    2.00
   2   8  -1   19.80    1.70
  -2   8   1   21.90    2.20
  -2   8   1   22.90    2.30
  -2   8  -1   19.80    1.90
  -2   8  -1   19.80    2.50
   2  -8  -1   19.90    1.90
  -2   8  -1   23.50    1.90
  -2   8  -1   21.70    2.00
   2   8   1   21.60    1.70
  -2   8  -1   20.70    1.70
  -2   8  -1   21.30    1.70
   2   8   1   22.60    1.80
   2   8   1   23.00    2.00
   2   8   1   19.30    1.80
   2   8   1   19.80    2.00
   2   8   1   20.00    1.80
   2  -8  -1   20.10    1.70
  -2   8  -1   21.10    2.10
  -3   8   1   15.20    1.40
   3  -8   1   16.50    1.50
   3   8  -1   15.40    1.50
   3   8  -1   13.80    1.30
   3   8  -1   14.30    1.50
  -3   8   1   16.60    1.70
   3  -8   1   14.30    1.70
  -3   8   1   15.90    1.60
  -3   8   1   15.80    1.50
   3  -8   1   14.00    1.70
  -3  -8  -1   14.90    1.40
   3   8  -1   14.90    1.70
  -3   8   1   17.00    2.00
  -3   8   1   16.00    1.90
  -3   8   1   14.80    1.40
  -3   8  -1   16.00    1.50
   3   8   1   15.00    1.60
   3   8   1   15.50    1.40
   3   8   1   14.10    1.70
  -3   8  -1   16.00    2.00
   3  -8  -1   19.00    1.90
   3  -8  -1   19.30    1.70
  -3   8  -1   17.50    1.70
  -3   8  -1   14.00    1.50
   3   8   1   12.50    1.50
  -3   8  -1   15.60    1.60
   3   8   1   15.70    1.40
  -3   8  -1   14.10    1.50
  -3   8  -1   19.00    2.00
   3   8   1   14.30    1.70
   4   8  -1   12.80    1.50
   4  -8   1   11.90    1.60
  -4  -8  -1   11.10    1.30
  -4   8   1   11.10    1.50
   4   8  -1   12.80    1.70
   4  -8   1   11.80    1.50
  -4   8   1   11.90    1.40
   4  -8   1   11.00    1.60
  -4   8   1   13.30    1.40
  -4   8   1   13.40    1.70
   4   8  -1   13.30    1.60
   4   8  -1   12.90    1.30
  -4   8   1   12.40    1.50
  -4   8   1   12.90    1.40
   4   8   1   10.40    1.40
  -4   8  -1   12.20    1.70
  -4   8  -1   13.10    1.40
   4   8   1   11.30    1.40
   4   8   1   13.00    1.50
   4  -8  -1   10.40    1.20
   4   8   1   11.90    1.20
  -4   8  -1   11.20    1.60
  -4   8  -1   12.40    1.40
  -4   8  -1   12.40    1.30
  -4   8  -1   12.70    1.30
   4   8   1   13.70    1.50
   4  -8  -1   12.60    1.70
  -4   8  -1   12.90    1.40
  -5   8   1  116.09    6.30
   5   8  -1  116.19    6.20
   5  -8   1  114.39    6.60
   5   8  -1  119.39    6.50
  -5   8   1  121.79    6.60
  -5  -8  -1  111.59    6.30
   5   8  -1  115.69    6.40
   5   8  -1  119.29    6.50
   5  -8   1  119.89    6.30
  -5   8   1  119.59    6.30
  -5   8   1  120.79    6.40
  -5   8   1  115.89    6.20
  -5   8   1  113.39    6.60
   5  -8   1  127.79    6.90
   5   8   1  107.89    6.10
  -5   8  -1  121.39    6.30
   5   8   1  115.29    6.60
  -5   8  -1  120.09    6.30
  -5   8  -1  110.79    6.70
   5  -8  -1  121.09    6.50
  -5   8  -1  121.59    6.40
   5   8   1  115.49    6.60
   5  -8  -1  121.19    6.80
  -5   8  -1  115.59    6.40
   5   8   1  123.39    6.60
   5  -8  -1  120.89    6.10
  -5   8  -1  125.19    6.40
   5  -8  -1  111.99    6.70
   5   8   1  123.69    6.30
   5  -8  -1  119.79    6.30
  -5   8  -1  118.99    6.70
   6   8  -1   36.00    2.40
  -6   8   1   36.10    2.20
  -6  -8  -1   31.70    2.30
   6  -8   1   36.70    2.70
   6  -8   1   31.00    2.30
  -6   8   1   35.80    2.40
   6   8  -1   30.20    2.10
   6   8  -1   30.90    2.30
   6  -8   1   33.20    2.20
   6   8  -1   35.90    2.50
   6   8  -1   33.50    2.40
  -6   8   1   36.60    2.30
   6  -8   1   29.20    2.00
   6  -8  -1   33.30    2.40
  -6   8  -1   28.40    2.10
   6  -8  -1   33.20    2.50
   6   8   1   30.40    2.20
  -6   8  -1   34.50    2.30
   6   8   1   40.10    2.60
   6  -8  -1   34.90    2.00
  -6   8  -1   30.70    2.20
   6   8   1   34.40    2.40
  -6   8  -1   34.50    2.20
  -6  -8   1   28.20    2.20
   6  -8  -1   30.90    2.10
   6   8   1   32.20    2.10
   6   8   1   32.10    2.50
   7  -8   1  155.28    7.70
   7   8  -1  159.38    8.20
  -7   8   1  150.78    8.10
   7   8  -1  153.68    8.00
  -7  -8  -1  152.58    8.00
   7   8  -1  151.68    8.20
   7   8  -1  165.48    8.20
  -7   8   1  172.48    8.10
   7  -8   1  159.78    8.20
   7  -8   1  165.68    8.50
   7  -8   1  148.39    8.00
   7  -8  -1  155.88    8.40
   7   8   1  162.28    8.20
   7   8   1  147.49    8.00
  -7   8  -1  154.68    7.90
   7   8   1  157.18    7.90
  -7   8  -1  165.18    8.10
   7  -8  -1  164.88    8.20
   7   8   1  159.88    8.30
   7  -8  -1  151.48    7.90
   7   8   1  168.38    8.30
   8   8  -1   20.10    1.50
   8   8  -1   15.80    1.30
   8   8  -1   18.40    1.30
  -8   8   1   16.90    1.30
  -8   8   1   18.30    1.20
   8  -8   1   18.20    1.30
   8  -8  -1   19.50    1.40
   8   8   1   17.10    1.10
   8   8   1   17.10    1.20
   8   8   1   18.10    1.40
  -8   8  -1   15.90    1.20
   8   8   1   21.70    1.50
   8   8   1   20.40    1.40
   0   9  -1    3.00    0.70
   0   9   1    3.00    0.90
   0   9  -1    3.00    0.90
   0  -9  -1    3.60    0.90
   0  -9  -1    2.00    0.70
   0   9  -1    3.50    0.80
   0   9   1    2.40    0.80
   0   9   1    2.90    0.90
   0   9   1    2.50    0.90
   0   9   1    2.90    0.90
   0   9  -1    3.80    0.90
   0   9  -1    3.70    1.00
   0   9   1    3.90    0.80
   0   9  -1    2.80    1.10
   0  -9   1    3.00    0.80
  -1   9   1   60.29    3.80
   1   9  -1   60.89    4.00
  -1   9   1   55.79    3.60
  -1   9   1   54.69    3.40
   1   9  -1   57.69    3.50
   1  -9   1   62.19    3.60
  -1   9   1   57.39    3.50
   1   9  -1   55.69    3.50
   1   9  -1   57.89    3.50
   1   9  -1   58.09    3.40
  -1  -9  -1   61.49    3.60
   1   9  -1   51.29    3.50
  -1   9   1   49.40    3.90
  -1   9   1   58.49    3.50
  -1   9  -1   60.09    3.50
  -1   9  -1   57.49    3.50
   1   9   1   60.59    3.70
  -1  -9   1   54.89    3.40
  -1   9  -1   55.59    3.50
   1   9   1   63.69    3.50
   1  -9  -1   60.49    3.70
   1  -9  -1   57.29    3.30
  -1   9  -1   58.19    3.70
  -1   9  -1   54.99    3.90
   1   9   1   60.19    3.90
  -1   9  -1   59.69    3.70
   1   9   1   54.69    3.50
   1   9   1   58.29    3.50
  -1   9  -1   56.09    4.00
   1   9   1   59.69    3.50
   2   9  -1   85.49    5.00
   2   9  -1   87.29    5.30
   2  -9   1   94.79    5.20
  -2   9   1   88.29    5.10
  -2   9   1   86.69    5.00
  -2   9   1   92.79    5.20
  -2   9   1   80.99    5.00
   2  -9   1   93.59    4.90
   2   9  -1   88.69    4.80
   2   9  -1   90.09    4.90
   2   9  -1   83.99    4.80
  -2   9   1   88.09    5.40
  -2   9   1   88.99    4.90
  -2   9   1   86.09    4.90
   2   9   1   92.19    4.90
  -2   9  -1   87.49    4.90
   2  -9  -1   87.09    5.20
  -2   9  -1   84.09    5.20
  -2   9  -1   83.69    5.00
  -2   9  -1   86.19    5.00
   2   9   1   91.09    5.10
   2   9   1   82.79    4.90
   2  -9  -1   96.59    4.90
  -2   9  -1   75.49    5.30
  -2   9  -1   89.69    5.10
   2   9   1   84.89    5.00
   2   9   1   85.19    5.30
   2   9   1   88.79    4.80
  -2   9  -1   87.59    4.90
   3  -9   1   40.60    2.70
  -3  -9  -1   35.30    2.50
  -3   9   1   40.40    3.10
   3   9  -1   36.20    2.70
   3   9  -1   37.60    2.50
   3  -9   1   40.10    2.80
  -3   9   1   35.90    2.50
   3   9  -1   38.20    2.50
  -3   9   1   36.70    2.70
  -3   9   1   37.00    2.50
  -3   9   1   38.20    2.90
  -3   9   1   39.40    2.70
  -3   9  -1   45.80    2.90
   3   9   1   42.10    2.60
   3   9   1   44.80    2.90
   3   9   1   39.00    2.50
  -3   9  -1   39.40    2.70
   3  -9  -1   39.90    2.60
  -3   9  -1   38.60    2.60
  -3   9  -1   42.60    3.10
  -3   9  -1   42.10    3.00
  -3   9  -1   40.60    2.70
   3  -9  -1   38.70    2.40
   3  -9  -1   39.10    2.90
   3   9   1   42.80    2.60
  -3   9  -1   43.30    2.70
   3   9   1   34.80    2.80
   3   9   1   41.30    2.80
  -4   9   1   14.90    1.50
   4  -9   1   14.40    1.80
  -4  -9  -1   13.80    1.40
  -4   9   1   13.30    1.60
   4   9  -1   13.90    1.50
   4   9  -1   14.30    1.40
  -4   9   1   14.40    1.60
  -4   9   1   14.50    1.60
   4  -9   1   15.70    1.80
   4  -9   1   12.40    1.50
  -4   9   1   14.00    1.30
   4   9  -1   11.70    1.30
  -4   9   1   12.20    1.30
   4  -9  -1   14.50    1.30
   4   9   1   15.10    1.40
   4   9   1   13.50    1.60
   4   9   1   12.10    1.40
  -4   9  -1   14.30    1.30
  -4   9  -1   14.70    1.40
  -4   9  -1   15.40    1.70
   4  -9  -1   15.10    1.50
   4  -9  -1   13.70    1.80
  -4   9  -1   17.00    1.80
  -4   9  -1   13.60    1.40
   4  -9  -1   14.60    1.50
   4   9   1   13.70    1.50
  -4   9  -1   16.70    2.00
   5   9  -1    4.70    0.80
  -5   9   1    6.90    0.90
  -5   9   1    4.50    0.90
  -5   9   1    3.90    1.00
  -5   9   1    5.60    0.80
   5   9  -1    6.50    1.10
   5  -9   1    5.10    0.80
   5   9  -1    4.60    0.90
  -5  -9  -1    5.70    0.80
   5  -9   1    4.50    0.90
  -5   9   1    7.80    1.00
   5  -9   1    6.60    1.10
   5  -9   1    3.70    1.10
   5   9  -1    5.00    0.70
  -5   9   1    6.60    0.80
   5   9   1    5.30    0.80
   5  -9  -1    6.70    1.10
  -5   9  -1    6.50    0.90
   5   9   1    8.40    1.10
  -5   9  -1    4.10    0.90
  -5   9  -1    3.70    0.90
  -5   9  -1    5.10    0.90
   5   9   1    6.20    0.80
  -5   9  -1    6.60    0.90
   5  -9  -1    5.50    0.70
   5   9   1    5.90    1.00
   5  -9  -1    5.70    0.90
   5   9   1    5.90    0.90
  -6   9   1   42.50    2.50
   6   9  -1   40.10    2.50
   6  -9   1   43.90    2.70
   6   9  -1   38.60    2.50
   6   9  -1   42.30    2.50
   6  -9   1   41.40    2.30
   6  -9   1   34.90    2.40
  -6   9   1   45.70    2.60
   6  -9   1   34.70    2.70
  -6   9   1   40.20    2.60
   6  -9  -1   41.80    2.20
   6   9   1   42.40    2.60
  -6   9  -1   38.80    2.40
   6   9   1   40.30    2.40
  -6   9  -1   40.00    2.40
  -6   9  -1   42.50    2.40
   6   9   1   42.60    2.60
   6  -9  -1   42.80    2.70
   6   9   1   41.20    2.60
   7  -9   1   56.09    2.90
   7  -9   1   52.09    2.90
  -7   9   1   51.99    2.80
   7   9  -1   50.59    2.90
  -7   9   1   47.40    2.80
   7   9  -1   45.30    2.80
   7   9   1   56.29    2.90
   7   9   1   47.10    2.70
  -7   9  -1   55.89    2.80
   7  -9  -1   48.20    2.70
   7  -9  -1   56.49    2.90
   7   9   1   46.10    2.90
   0  10   1   60.89    4.10
   0 -10  -1   73.39    4.10
   0  10   1   83.99    4.60
   0  10  -1   77.89    4.30
   0  10  -1   78.99    4.20
   0  10   1   74.29    4.60
   0  10  -1   73.99    4.20
   0 -10   1   69.89    4.20
   0  10   1   75.69    4.40
   0  10  -1   81.49    4.40
   0  10   1   72.59    4.20
   0  10   1   73.29    4.20
   0  10  -1   80.99    4.70
   0 -10  -1   71.59    4.30
  -1  10   1  102.79    6.30
  -1  10   1  126.99    6.90
  -1  10   1  122.49    6.60
  -1  10   1  120.49    6.40
   1 -10   1  125.29    6.60
   1  10  -1  128.79    6.40
   1  10  -1  129.09    6.50
   1  10  -1  110.39    6.40
   1 -10   1  114.79    6.30
   1  10  -1  126.39    6.30
   1  10  -1  124.79    6.80
  -1  10   1  108.29    6.40
  -1  10   1  114.89    6.40
   1 -10  -1  121.99    6.60
   1  10   1  121.09    6.80
   1  10   1  128.69    6.70
  -1  10  -1  115.59    6.40
  -1  10  -1  110.89    6.30
  -1  10  -1  127.09    6.40
   1 -10  -1  127.29    6.30
  -1  10  -1  124.49    6.50
   1  10   1  119.39    6.40
  -1 -10   1  111.99    6.30
   1  10   1  127.19    6.40
  -1  10  -1  118.49    6.80
   1  10   1  127.49    6.50
   2  10  -1  115.19    7.00
   2 -10   1  132.99    6.80
   2  10  -1  132.59    6.70
  -2  10   1  135.09    6.80
  -2  10   1  138.29    7.00
  -2  10   1  132.19    7.30
  -2  10   1  115.99    6.70
   2  10  -1  120.49    6.70
  -2  10   1  131.99    6.90
   2 -10   1  129.19    7.00
   2  10  -1  126.79    6.80
  -2 -10  -1  123.09    6.80
  -2  10   1  130.49    6.80
   2  10  -1  136.19    6.70
   2  10   1  129.89    6.90
   2  10   1  137.79    6.90
   2  10   1  131.89    6.80
  -2  10  -1  121.29    6.90
   2  10   1  127.19    6.70
  -2  10  -1  139.59    6.80
  -2  10  -1  112.29    6.80
   2  10   1  118.09    7.00
   2 -10  -1  132.69    6.60
   2 -10  -1  137.59    6.80
  -2  10  -1  118.69    6.70
   2 -10  -1  130.69    7.10
   2  10   1  127.99    6.70
  -2  10  -1  134.69    6.90
  -2  10  -1  139.79    7.40
   3  10  -1   96.69    5.20
  -3  10   1  101.39    5.50
  -3  10   1   94.89    5.30
  -3  10   1  109.89    5.40
   3 -10   1  105.59    5.30
   3  10  -1   99.19    5.20
  -3  10   1   93.89    5.40
   3 -10   1   87.59    5.50
  -3  10   1  103.19    5.80
  -3 -10  -1   90.19    5.30
   3  10  -1   91.69    5.30
  -3  10   1  102.99    5.50
   3  10   1  102.99    5.30
  -3  10  -1   96.59    5.30
  -3  10  -1  102.69    5.50
   3  10   1  101.29    5.40
   3 -10  -1  102.79    5.10
   3  10   1  103.59    5.50
  -3  10  -1   98.79    5.70
   3 -10  -1  109.39    5.40
  -3  10  -1  107.09    5.40
  -3  10  -1  102.59    5.30
  -3  10  -1   88.99    5.40
   3 -10  -1   92.19    5.50
   3  10   1  102.69    5.30
  -4  10   1   46.50    3.20
  -4  10   1   47.90    2.90
  -4  10   1   51.09    2.90
   4  10  -1   48.40    2.90
   4 -10   1   49.99    3.00
   4 -10   1   52.19    3.00
   4  10  -1   46.00    2.80
  -4  10   1   49.90    3.00
  -4  10   1   50.79    2.90
   4 -10   1   51.99    2.70
  -4  10   1   49.00    3.00
   4  10   1   47.50    3.00
   4  10   1   48.90    2.80
  -4  10  -1   50.79    3.00
   4  10   1   49.20    2.80
   4 -10  -1   51.79    3.00
  -4  10  -1   47.40    3.20
   4  10   1   50.19    3.10
  -4  10  -1   50.99    3.10
   4 -10  -1   46.80    2.90
   4 -10  -1   52.49    2.80
  -4  10  -1   53.39    3.00
  -4  10  -1   50.99    2.90
   5 -10   1  176.38    9.00
  -5  10   1  202.78    9.10
  -5  10   1  174.98    8.90
  -5  10   1  174.88    9.00
   5 -10   1  195.68    9.20
  -5  10   1  199.38    9.10
   5  10  -1  166.18    9.00
   5 -10   1  196.28    8.90
  -5  10  -1  199.18    9.10
  -5  10  -1  184.38    9.00
   5  10   1  177.28    9.10
   5  10   1  181.78    9.20
  -5  10  -1  174.08    9.00
   5 -10  -1  158.48    9.00
   5  10   1  182.28    9.00
  -5  10  -1  168.68    9.10
   5 -10  -1  191.18    8.90
  -5  10  -1  166.08    9.30
   5 -10  -1  175.18    9.10
   6 -10   1   24.60    1.30
  -6  10   1   26.80    1.50
   6  10   1   19.80    1.40
  -6  10  -1   23.60    1.50
   6  10   1   22.60    1.60
  -6  10  -1   25.00    1.40
  -6  10  -1   26.70    1.50
   6 -10  -1   26.40    1.50
   6  10   1   26.30    1.60
   0 -11   1  109.49    5.70
   0  11   1  107.49    6.00
   0  11   1  112.39    5.70
   0 -11  -1  102.99    5.60
   0  11  -1  105.19    5.60
   0  11   1  110.79    5.80
   0  11   1  114.69    5.70
   0  11  -1  115.69    5.70
   0  11   1  109.99    5.80
   0  11  -1  109.79    5.60
   0  11  -1  108.09    5.70
   1 -11   1   17.10    1.30
  -1  11   1   17.70    1.40
   1  11  -1   18.30    1.40
  -1  11   1   18.10    1.60
  -1  11   1   17.50    1.50
  -1  11   1   16.20    1.30
   1  11  -1   17.50    1.40
   1  11  -1   18.80    1.30
  -1  11   1   18.40    1.40
  -1 -11  -1   18.70    1.40
  -1  11   1   17.10    1.40
   1  11  -1   17.70    1.70
   1 -11  -1   13.70    1.20
   1  11   1   15.40    1.50
  -1  11  -1   19.60    1.50
   1  11   1   16.60    1.40
   1  11   1   17.40    1.40
  -1  11  -1   18.80    1.30
  -1  11  -1   19.90    1.70
   1  11   1   18.90    1.40
   1  11   1   15.80    1.40
   1 -11  -1   19.20    1.40
  -1  11  -1   16.10    1.50
  -1  11  -1   16.00    1.30
  -2  11   1    7.80    0.90
  -2  11   1    8.50    1.00
  -2  11   1    8.00    1.00
   2  11  -1    8.00    0.80
  -2  11   1    7.30    1.20
  -2  11   1    8.60    0.90
   2  11  -1    8.10    0.80
   2 -11   1    8.00    0.90
   2  11  -1    7.30    0.80
   2 -11   1    7.20    0.80
  -2  11   1    8.00    0.90
  -2  11  -1    8.00    1.10
  -2  11  -1    8.40    1.00
   2  11   1    8.90    1.00
   2 -11  -1    7.40    0.90
   2  11   1    9.90    1.00
   2 -11  -1    8.20    1.00
   2  11   1    8.10    1.00
   2  11   1    8.90    1.00
  -2  11  -1    9.00    0.90
  -2  11  -1    8.80    0.90
   2  11   1    8.10    1.10
  -2  11  -1    6.50    0.90
   3 -11   1   14.90    1.10
  -3  11   1   15.40    1.20
  -3  11   1   12.60    1.30
  -3  11   1   15.80    1.20
  -3  11   1   14.20    1.10
   3 -11   1   14.60    1.20
   3  11  -1   13.70    1.00
  -3  11   1   14.00    1.10
  -3  11  -1   15.70    1.20
   3  11   1   14.20    1.20
  -3  11  -1   14.90    1.20
   3  11   1   13.80    1.00
  -3  11  -1   16.70    1.30
   3  11   1   15.40    1.20
  -3  11  -1   14.60    1.10
   3 -11  -1   14.50    1.00
   3 -11  -1   13.30    1.10
  -4  11   1    7.50    0.70
  -4  11   1    9.20    0.80
   4 -11   1    9.70    0.80
   4 -11   1   10.60    0.80
  -4  11  -1   10.30    0.80
   4  11   1    9.60    0.90
   4 -11  -1   10.60    0.70
   4  11   1    7.90    0.70
  -4  11  -1    9.60    0.80
  -4  11  -1   11.00    0.90
   0   0  -2 1483.45   68.19
   0   0   2 1458.65   68.19
   0   0  -2 1414.36   68.59
   0   0  -2 1236.98   68.29
   0   0   2 1525.95   68.09
   0   0   2 1464.15   68.49
   0   0  -2 1409.56   67.59
   0   0   2 1322.07   68.49
   0   0  -2 1403.86   67.79
   0   0   2 1461.65   68.19
   1   0  -2   27.40    2.40
  -1   0   2   28.40    2.20
   1   0  -2   29.90    2.40
   1   0  -2   31.40    2.20
   1   0   2   34.10    2.50
  -1   0  -2   30.90    2.00
   1   0   2   29.20    2.60
   1   0   2   31.50    2.30
   1   0  -2   31.80    2.30
   1   0   2   27.20    2.00
  -1   0   2   26.80    2.30
  -1   0  -2   33.60    2.70
  -1   0  -2   34.50    2.20
   1   0  -2   30.40    2.00
  -1   0  -2   27.60    2.40
  -1   0   2   31.30    2.50
  -1   0   2   29.00    2.00
   1   0   2   37.10    2.20
   2   0  -2  479.05   22.80
  -2   0   2  461.15   22.80
   2   0   2  443.46   23.70
   2   0   2  495.25   23.40
  -2   0   2  416.96   22.40
  -2   0   2  463.35   23.80
  -2   0  -2  495.75   23.40
   2   0  -2  493.95   23.50
  -2   0   2  505.35   23.40
  -2   0  -2  494.25   24.00
   2   0   2  452.85   23.50
  -2   0  -2  467.55   23.30
   2   0  -2  405.16   23.60
  -3   0  -2   22.90    2.50
   3   0  -2   23.50    2.70
  -3   0   2   22.60    2.60
   3   0   2   23.70    2.60
  -3   0  -2   23.90    2.30
   3   0   2   27.50    2.50
  -3   0  -2   23.70    2.40
  -3   0   2   24.20    2.40
   3   0  -2   23.50    2.30
  -3   0   2   22.30    1.60
   3   0   2   23.30    2.50
  -4   0  -2  289.17   15.30
   4   0  -2  287.07   16.10
   4   0  -2  283.57   15.50
  -4   0   2  271.77   14.20
   4   0   2  283.77   15.70
   4   0   2  280.27   15.60
  -4   0  -2  298.47   15.80
  -4   0  -2  283.77   15.60
  -4   0   2  261.07   13.80
  -4   0   2  265.97   15.90
   4   0   2  276.57   15.90
  -4   0  -2  262.77   13.90
  -4   0   2  311.57   15.80
   5   0  -2  132.59    7.80
  -5   0  -2  161.18    9.50
   5   0  -2  151.68   10.40
   5   0   2  142.69    9.80
   5   0   2  144.19   10.00
  -5   0   2  168.88    7.90
  -5   0  -2  156.38   10.00
  -5   0   2  143.69   10.10
  -5   0   2  132.09    9.60
  -5   0  -2  138.19    7.50
  -5   0  -2  152.48    7.80
   5   0  -2  164.18    9.80
   5   0   2  151.38    9.90
  -5   0   2  147.09    7.50
  -6   0   2   33.40    2.20
  -6   0  -2   36.00    2.20
  -6   0   2   26.40    4.20
   6   0   2   31.40    2.40
  -6   0   2   38.50    2.50
  -6   0  -2   31.20    4.10
   6   0   2   34.70    4.30
   6   0  -2   36.10    4.30
  -6   0  -2   33.90    3.90
  -6   0  -2   34.10    2.40
  -6   0   2   32.60    4.40
   6   0   2   30.80    4.00
   6   0  -2   34.20    4.50
   6   0   2   29.00    4.30
   6   0  -2   34.50    2.50
   7   0  -2   50.59    3.20
   7   0  -2   43.20    5.30
   7   0  -2   44.10    3.00
   7   0  -2   49.99    3.30
  -7   0  -2   42.90    2.80
   7   0  -2   47.80    3.10
  -7   0   2   46.90    3.30
   7   0   2   39.80    2.90
  -7   0  -2   41.20    4.50
  -7   0   2   47.20    2.90
  -7   0  -2   46.70    2.70
  -7   0  -2   46.60    2.80
   7   0   2   46.90    3.00
  -7   0  -2   44.60    3.10
   7   0  -2   42.30    2.90
   7   0  -2   45.80    3.00
  -7   0   2   49.00    2.70
   7   0   2   43.60    3.00
   7   0   2   45.40    2.90
   7   0   2   47.00    5.30
  -8   0  -2    3.90    0.90
  -8   0   2    5.80    1.00
  -8   0   2    6.30    0.90
   8   0  -2    7.60    1.10
   8   0   2    6.80    1.10
   8   0   2    7.20    1.30
  -8   0  -2    6.90    0.90
   8   0  -2    6.70    1.30
   8   0  -2    6.50    1.10
   8   0   2    6.80    1.00
   8   0  -2    7.00    1.10
   8   0   2    7.40    1.10
  -8   0   2    5.20    1.10
  -8   0  -2    6.40    0.90
  -9   0   2    0.40    0.60
  -9   0  -2    0.80    0.50
   9   0   2    0.40    0.80
  -9   0   2    1.00    0.60
   9   0   2    0.10    0.60
   9   0  -2    0.40    0.60
  -9   0  -2    1.00    0.50
   9   0  -2    1.80    0.70
   9   0  -2    0.40    0.90
  -9   0  -2    0.90    0.90
   9   0  -2    0.40    0.70
  -9   0   2    1.00    0.70
  10   0  -2  157.68    7.80
  10   0  -2  155.58    7.80
  10   0  -2  137.79    7.90
 -10   0  -2  162.78    7.70
  10   0  -2  149.69    7.80
 -10   0   2  141.79    7.90
 -10   0   2  148.79    7.40
  10   0   2  136.99    7.60
 -10   0  -2  152.38    7.90
  10   0   2  156.48    7.80
  11   0  -2    8.80    0.90
 -11   0   2    8.20    1.00
 -11   0  -2    8.10    0.90
  11   0   2   11.00    1.00
 -11   0  -2    9.40    0.80
   0  -1   2 1960.30   88.39
   0   1  -2 1876.11   87.79
   0   1   2 1948.71   88.39
   0   1  -2 1785.92   88.59
   0  -1  -2 1673.53   87.89
   0  -1  -2 2005.40   87.79
   0   1  -2 1788.02   88.29
   0  -1   2 1844.52   87.79
   0   1   2 1856.51   88.79
   0   1  -2 1945.91   87.99
   0   1   2 1537.05   87.69
   0  -1  -2 1820.82   88.69
   0  -1  -2 1753.82   88.29
   0  -1   2 1783.32   88.29
   0  -1   2 1741.83   88.09
   0   1   2 1910.11   87.99
   0   1   2 2026.50   88.09
   0  -1  -2 1838.72   87.89
   0   1  -2 1764.02   88.29
   1  -1   2   38.40    2.90
   1   1  -2   44.80    2.30
  -1   1   2   37.60    3.10
   1  -1   2   44.20    2.90
   1  -1   2   36.50    2.40
   1   1  -2   37.70    2.80
  -1   1   2   42.20    2.80
  -1   1   2   45.10    3.00
  -1   1   2   43.40    2.50
   1  -1   2   42.90    2.90
  -1  -1  -2   42.10    2.80
   1   1  -2   42.00    2.90
  -1   1   2   39.50    2.80
   1   1  -2   38.60    3.00
  -1  -1  -2   37.40    2.70
  -1  -1  -2   40.90    3.20
   1   1   2   32.30    3.00
  -1   1  -2   43.80    2.50
   1  -1  -2   42.30    3.10
   1  -1  -2   40.30    2.80
   1   1   2   43.10    2.20
  -1  -1   2   36.10    2.80
   1   1   2   43.00    2.80
  -1  -1   2   40.70    2.50
   1  -1  -2   43.40    2.90
  -1  -1   2   33.50    2.90
   1   1   2   40.00    2.20
  -1   1  -2   40.20    2.70
  -1   1  -2   42.60    3.30
   1   1   2   40.70    2.80
   1  -1  -2   42.10    2.90
  -2  -1  -2  456.55   22.10
  -2   1   2  416.96   22.00
  -2  -1  -2  436.76   21.90
   2   1  -2  452.55   22.10
   2   1  -2  437.86   21.30
  -2   1   2  382.46   21.20
  -2  -1  -2  465.95   22.60
   2  -1   2  461.05   22.00
   2  -1   2  413.76   22.10
  -2   1   2  456.45   22.00
  -2  -1  -2  397.56   21.30
   2  -1   2  452.85   21.90
  -2  -1   2  375.96   21.20
  -2   1  -2  459.95   21.90
  -2  -1   2  392.56   22.30
   2   1   2  489.85   21.40
  -2   1  -2  468.25   22.70
   2   1   2  485.65   22.30
   2  -1  -2  423.66   21.60
   2  -1  -2  405.36   21.90
  -2  -1   2  417.46   21.00
   2  -1  -2  445.06   22.30
   2  -1  -2  419.76   21.90
   2   1   2  395.96   22.30
  -2  -1   2  456.85   21.80
  -2   1  -2  427.06   21.70
   3   1  -2  101.49    6.30
  -3  -1  -2   90.69    5.80
  -3   1   2   94.99    6.10
   3   1  -2   94.79    6.70
  -3  -1  -2   92.19    6.20
   3  -1   2   93.49    6.00
  -3  -1  -2   87.19    6.00
   3  -1   2   90.49    5.90
   3   1  -2   94.99    6.40
  -3   1   2   83.09    5.20
   3  -1   2   96.69    6.30
  -3   1   2  102.79    6.20
   3  -1  -2   95.09    5.50
   3  -1  -2   77.69    5.30
   3   1   2   96.19    6.60
   3  -1  -2   88.49    5.70
  -3  -1   2   93.59    5.00
  -3   1  -2   99.69    6.00
  -3  -1   2   99.39    6.10
   3   1   2   82.19    5.50
  -3   1  -2  101.29    6.50
  -3   1  -2   93.49    5.90
   3  -1  -2   95.39    6.50
  -4  -1  -2  128.69    8.10
  -4  -1  -2  129.59    8.30
   4   1  -2  128.59    8.30
  -4  -1  -2  129.49    6.60
   4   1  -2  104.79    8.60
   4  -1   2  131.09    8.10
  -4   1   2  123.79    6.70
  -4   1   2  143.09    8.50
   4   1  -2  140.29    8.80
   4  -1   2  123.29    8.10
  -4  -1  -2  131.79    8.00
   4  -1   2  137.09    8.70
  -4   1   2  116.59    8.10
  -4   1   2  128.29    7.20
   4  -1  -2  138.19    8.00
   4   1   2  136.19    9.00
  -4   1  -2  133.29    8.50
   4   1   2  111.29    8.20
  -4  -1   2  123.99    7.00
  -4  -1   2  121.19    6.50
   4   1   2  117.29    7.70
  -4   1  -2  144.09    8.10
   4  -1  -2  136.69    8.90
  -4  -1   2  137.79    8.40
  -4   1  -2  117.19    8.10
  -5  -1  -2    8.80    1.90
  -5   1   2    7.40    1.00
  -5  -1  -2    9.10    2.40
  -5  -1  -2    7.70    0.90
  -5   1   2    8.30    2.10
   5  -1   2    8.40    2.00
   5  -1   2    9.00    2.40
   5   1  -2    6.10    1.20
   5   1  -2   11.30    2.40
   5   1  -2    7.90    2.10
  -5   1   2    7.70    0.90
   5  -1   2    6.50    1.80
  -5   1   2    7.70    2.20
  -5  -1  -2    7.90    1.10
   5   1   2    5.90    1.80
   5  -1  -2    8.00    1.90
  -5  -1   2    8.20    2.40
   5   1   2    8.80    2.00
   5   1   2    7.10    2.30
   5  -1  -2    6.00    2.20
  -5   1  -2    6.10    1.70
  -5   1  -2    6.50    1.80
   5  -1  -2    6.80    1.00
  -5  -1   2    7.20    2.00
  -5   1  -2    6.10    1.00
  -5  -1   2    8.10    1.00
  -6   1   2  171.78    8.50
  -6   1   2  166.38   11.20
  -6  -1  -2  168.18    8.20
  -6  -1  -2  157.18   11.20
   6   1  -2  166.28    8.60
   6  -1   2  153.48   11.30
   6   1  -2  170.58   11.10
  -6  -1  -2  169.98    8.50
  -6   1   2  158.58    8.10
   6  -1   2  156.98    8.50
  -6  -1  -2  158.58   10.30
   6   1  -2  158.18   11.50
   6  -1  -2  155.38   11.60
   6   1   2  156.28   11.70
   6  -1  -2  146.29   10.20
  -6   1  -2  149.69    8.10
  -6  -1   2  150.68   11.00
  -6   1  -2  158.48   10.30
   6  -1  -2  162.38    8.70
  -6  -1   2  134.69   11.30
  -6   1  -2  161.68   11.10
  -6  -1   2  164.58    8.10
   6   1   2  151.08   11.00
  -6  -1   2  172.28    8.50
   7  -1   2  136.89    7.60
   7   1  -2  142.69    7.60
   7   1  -2  147.99    7.70
  -7  -1  -2  153.78    7.50
  -7   1   2  134.99    7.30
   7   1  -2  140.89    7.60
  -7  -1  -2  125.39    9.50
   7  -1   2  134.09   10.10
   7  -1   2  149.59    7.60
  -7   1   2  147.49    7.90
  -7   1   2  145.09    7.20
  -7  -1  -2  140.29    7.20
   7   1  -2  145.39    7.60
   7   1  -2  148.99    7.90
  -7  -1  -2  150.08    7.90
  -7   1   2  151.88    7.50
   7  -1   2  143.29    7.60
   7   1  -2  147.89    7.70
   7   1  -2  135.59   10.50
   7  -1   2  144.29    7.90
  -7   1   2  133.79    7.70
   7   1  -2  147.19    7.60
  -7  -1   2  161.08    8.00
   7   1   2  140.49    8.00
   7  -1  -2  130.99    7.50
   7   1   2  144.69    7.40
  -7  -1   2  148.09    7.50
   7   1   2  133.49    7.60
  -7  -1   2  143.19    7.30
   7   1   2  141.79    7.60
   7  -1  -2  145.69    7.60
   7  -1  -2  138.89    7.50
   7  -1  -2  147.19    8.00
   7   1   2  143.49   10.80
   7   1   2  144.89    7.70
  -7   1  -2  140.29    7.40
  -7   1  -2  143.59    7.20
  -7   1  -2  138.99    9.80
   7   1   2  129.89    7.50
   7  -1  -2  138.89    7.60
  -8   1   2   43.90    3.10
   8   1  -2   40.80    2.90
   8  -1   2   42.10    3.20
   8   1  -2   43.40    2.90
   8   1  -2   44.00    2.90
   8   1  -2   42.80    3.00
   8  -1   2   43.80    3.00
  -8   1   2   44.20    2.80
  -8  -1  -2   43.90    2.80
  -8  -1  -2   45.90    2.60
   8   1  -2   44.00    3.00
   8   1  -2   46.00    3.00
  -8  -1  -2   40.10    3.10
   8   1  -2   45.60    3.30
  -8  -1  -2   44.50    2.80
   8  -1   2   46.40    2.90
  -8   1   2   46.20    2.60
   8   1   2   46.50    3.20
   8  -1  -2   43.80    3.00
  -8  -1   2   39.80    2.60
  -8  -1   2   48.20    3.30
  -8   1  -2   42.90    2.50
   8   1   2   43.90    3.00
   8  -1  -2   44.40    3.10
   8  -1  -2   45.30    3.30
   8   1   2   43.00    2.90
  -8  -1   2   41.10    2.80
  -8   1  -2   44.40    3.00
   8  -1  -2   40.00    2.90
  -8   1  -2   41.70    2.80
   8   1   2   43.60    3.00
   9  -1   2    1.00    0.70
   9   1  -2    0.90    0.80
  -9  -1  -2    1.10    0.50
   9   1  -2    1.00    0.60
   9   1  -2    1.90    0.90
  -9   1   2    1.90    0.70
  -9  -1  -2    1.10    0.50
   9   1  -2    0.70    0.80
  -9   1   2    2.10    0.60
   9   1  -2    1.90    0.80
   9   1  -2    2.10    0.90
  -9  -1  -2    2.20    0.60
   9  -1   2    2.50    0.80
  -9   1  -2    1.70    0.70
  -9  -1   2    1.10    0.70
  -9  -1   2    1.00    0.90
   9   1   2    1.10    0.80
   9  -1  -2    1.50    0.80
   9  -1  -2    1.20    0.60
   9  -1  -2    1.00    1.00
   9   1   2    0.80    0.70
   9   1   2    1.80    0.70
  -9  -1   2    2.30    1.00
  -9  -1   2    1.20    0.60
  -9   1  -2    0.90    0.50
   9  -1  -2    1.70    0.70
   9   1   2    1.80    0.70
 -10  -1  -2   41.70    2.70
 -10   1   2   38.70    2.60
  10  -1   2   44.10    2.70
  10  -1   2   40.60    2.60
 -10   1   2   34.90    2.70
 -10  -1  -2   38.50    2.20
 -10  -1  -2   43.90    2.60
  10   1  -2   41.70    2.60
  10   1  -2   47.30    2.70
  10   1  -2   40.70    2.60
  10   1   2   42.00    2.70
 -10  -1   2   41.80    2.90
  10  -1  -2   41.20    2.70
 -10   1  -2   44.40    2.60
 -10  -1   2   42.50    2.30
 -10   1  -2   37.30    2.60
  10  -1  -2   39.10    2.80
 -10  -1   2   35.60    2.40
  10   1   2   38.30    2.50
  10  -1  -2   43.00    2.60
 -11   1   2    2.20    0.50
  11   1  -2    2.60    0.50
  11  -1   2    1.30    0.40
 -11  -1  -2    1.90    0.40
  11   1  -2    2.00    0.40
 -11  -1  -2    1.70    0.40
  11  -1   2    3.00    0.50
 -11   1  -2    1.50    0.50
 -11  -1   2    2.10    0.60
  11  -1  -2    2.20    0.40
  11  -1  -2    1.30    0.50
  11   1   2    2.80    0.60
 -11   1  -2    3.00    0.40
 -11  -1   2    2.20    0.50
   0   2   2 3897.71  186.98
   0  -2  -2 3601.94  187.68
   0   2   2 4161.98  187.08
   0  -2   2 4272.17  186.98
   0   2   2 3956.90  186.38
   0  -2   2 3666.23  186.88
   0   2   2 3478.45  186.18
   0   2  -2 4285.17  187.08
   0   2  -2 4205.28  186.68
   0   2  -2 3774.22  187.58
   0  -2   2 4154.68  186.88
   0   2   2 3607.34  186.68
   0  -2  -2 3826.62  186.28
   0  -2   2 3726.63  187.08
   0  -2   2 3975.40  186.38
  -1   2   2 1426.96   64.39
   1  -2   2 1247.08   64.19
  -1   2   2 1481.75   64.59
  -1  -2  -2 1471.45   64.69
  -1  -2  -2 1275.07   65.39
  -1   2   2 1348.57   63.79
   1   2  -2 1228.78   64.69
   1  -2   2 1373.36   64.29
  -1   2   2 1389.16   64.69
   1   2  -2 1278.87   64.09
   1   2  -2 1409.76   64.69
   1   2  -2 1419.96   65.09
   1  -2   2 1318.87   64.39
  -1   2  -2 1443.06   64.29
   1   2   2 1374.76   64.49
   1  -2  -2 1160.18   64.29
  -1  -2   2 1294.77   64.19
  -1   2  -2 1355.26   64.49
   1  -2  -2 1105.09   65.09
  -1  -2   2 1235.18   64.19
   1  -2  -2 1481.55   64.69
  -1   2  -2 1262.37   64.19
   1   2   2 1391.16   64.79
  -1  -2   2 1190.78   64.79
   2   2  -2  173.68    9.80
  -2  -2  -2  205.58   10.90
  -2  -2  -2  180.28   10.10
  -2   2   2  183.18    9.70
   2  -2   2  171.78    9.60
  -2   2   2  185.28   10.10
  -2   2   2  181.08    9.20
  -2   2   2  157.38    9.60
   2  -2   2  176.28    9.40
   2  -2   2  161.68   10.20
  -2   2   2  170.48    9.40
   2   2  -2  168.18   10.00
   2   2  -2  187.78   10.20
  -2  -2  -2  173.58    9.90
  -2  -2   2  149.59    9.60
   2   2   2  170.78   10.50
   2   2   2  197.88   10.10
  -2   2  -2  186.28    9.80
  -2  -2   2  200.88    9.90
  -2   2  -2  153.58    9.30
   2  -2  -2  189.78   10.40
   2  -2  -2  183.48   10.50
  -2   2  -2  169.08    9.80
  -2  -2   2  182.28    9.30
  -2   2  -2  196.28   11.00
   3   2  -2  512.45   25.00
  -3   2   2  484.75   23.50
  -3  -2  -2  475.95   23.70
   3  -2   2  398.56   22.20
  -3  -2  -2  435.76   22.20
   3   2  -2  397.46   23.70
   3  -2   2  459.65   23.40
  -3  -2  -2  481.25   24.30
   3   2  -2  479.25   24.10
   3  -2   2  464.85   23.20
  -3   2   2  497.95   24.10
  -3  -2  -2  425.56   23.90
  -3   2   2  475.05   23.10
   3  -2   2  464.25   24.40
  -3   2  -2  492.55   23.80
   3   2   2  414.46   23.80
  -3  -2   2  442.86   22.70
   3   2   2  427.96   22.60
  -3  -2   2  412.46   22.50
   3  -2  -2  462.45   24.40
  -3   2  -2  516.85   25.10
  -3   2  -2  418.36   23.40
  -3  -2   2  463.35   23.80
   3  -2  -2  474.85   24.00
   3   2   2  498.35   24.90
   3  -2  -2  480.15   23.00
   4  -2   2  201.48   11.30
  -4   2   2  185.18   10.70
   4  -2   2  178.28    9.90
   4   2  -2  205.88   12.00
  -4  -2  -2  196.28    9.90
  -4  -2  -2  205.38   12.00
   4  -2   2  199.18   12.30
  -4   2   2  218.78   12.20
   4  -2   2  176.48   10.90
  -4  -2  -2  187.38   11.60
  -4  -2  -2  200.48   11.50
   4   2  -2  185.98   12.60
   4   2  -2  209.88   12.10
  -4  -2   2  183.08    9.70
  -4   2  -2  204.68   11.70
   4   2   2  181.08   10.60
  -4   2  -2  201.58   11.50
   4   2   2  209.78   12.80
   4  -2  -2  218.88   11.50
   4   2   2  185.08   11.90
  -4  -2   2  194.18   11.80
  -4   2  -2  216.58   12.60
   4  -2  -2  194.78   10.90
   4  -2  -2  198.48   12.40
   5   2  -2  633.54   33.90
  -5  -2  -2  669.33   31.20
  -5  -2  -2  609.54   30.90
  -5   2   2  577.74   30.90
  -5   2   2  604.94   33.80
   5   2  -2  670.43   34.00
   5   2  -2  597.14   31.20
  -5  -2  -2  631.84   33.90
  -5  -2  -2  648.44   33.10
   5  -2   2  629.74   31.40
   5  -2   2  643.24   34.40
   5   2  -2  675.33   35.40
  -5   2  -2  648.54   33.60
   5   2   2  657.53   34.00
  -5   2  -2  683.63   33.30
   5   2   2  670.63   35.00
  -5  -2   2  657.03   31.10
   5  -2  -2  599.84   31.40
  -5  -2   2  665.83   33.90
   5  -2  -2  661.53   34.70
  -6  -2  -2  196.78   12.30
   6   2  -2  195.38   10.30
  -6   2   2  172.38   12.90
   6  -2   2  207.38   10.50
  -6  -2  -2  193.08    9.90
  -6  -2  -2  207.58   10.30
  -6   2   2  188.68    9.90
   6  -2   2  177.68   13.40
   6   2  -2  209.08   13.40
   6   2   2  196.68   14.10
   6  -2  -2  212.68   10.60
  -6  -2   2  188.98   14.10
  -6  -2   2  219.28   10.30
  -6   2  -2  196.48   12.30
  -6  -2   2  190.28   13.10
  -6   2  -2  175.58   12.60
  -6  -2   2  208.48   10.00
   6   2   2  209.28   13.40
   7   2  -2    2.70    0.80
  -7  -2  -2    3.40    1.00
   7  -2   2    3.80    0.90
   7   2  -2    3.50    0.80
   7   2  -2    4.70    1.00
   7   2  -2    3.90    1.10
   7   2  -2    3.60    2.20
  -7  -2  -2    2.90    0.70
   7   2  -2    4.70    0.90
  -7  -2  -2    3.70    0.70
   7   2  -2    4.00    1.00
   7  -2   2    3.60    1.10
  -7  -2  -2    2.40    1.50
   7   2  -2    4.10    0.90
  -7   2   2    2.90    0.60
  -7   2   2    3.40    0.80
   7  -2   2    3.70    0.80
   7   2   2    3.60    0.90
  -7   2  -2    3.30    0.70
   7  -2  -2    4.10    1.00
   7  -2  -2    4.00    1.00
   7   2   2    4.00    0.80
  -7   2  -2    2.00    1.90
   7  -2  -2    3.90    0.90
   7  -2  -2    4.00    0.80
   7  -2  -2    3.20    0.90
   7   2   2    6.30    1.00
  -7  -2   2    2.80    0.90
  -7   2  -2    3.30    1.00
   7   2   2    2.70    2.20
   7   2   2    3.30    1.00
   7   2   2    4.60    0.90
  -7  -2   2    3.60    0.80
   7   2   2    3.50    1.00
  -8  -2  -2  260.77   13.20
  -8   2   2  253.67   12.90
   8   2  -2  270.37   13.50
  -8   2   2  271.77   13.70
  -8  -2  -2  250.17   13.70
   8   2  -2  272.57   13.60
   8  -2   2  272.67   13.50
  -8  -2  -2  263.87   13.30
  -8   2   2  258.97   13.10
   8   2  -2  271.17   13.40
   8  -2   2  261.87   13.40
   8   2  -2  242.38   13.40
   8   2  -2  275.47   13.60
   8   2  -2  249.18   13.60
   8   2  -2  274.17   13.50
   8  -2   2  270.77   13.80
  -8  -2  -2  269.27   13.00
   8  -2  -2  255.37   13.40
   8   2   2  249.58   13.40
   8  -2  -2  251.67   13.30
   8  -2  -2  274.47   13.90
   8   2   2  273.27   13.50
   8  -2  -2  261.97   13.40
  -8   2  -2  258.87   13.50
  -8  -2   2  242.58   13.20
   8   2   2  267.97   13.50
  -8  -2   2  272.87   13.70
   8  -2  -2  274.97   13.50
  -8  -2   2  266.47   13.00
   8   2   2  263.67   13.40
  -8   2  -2  278.27   13.30
   8   2   2  275.17   13.50
   9  -2   2  166.78    8.70
   9  -2   2  164.28    8.90
   9   2  -2  163.28    8.80
  -9  -2  -2  169.28    8.50
  -9   2   2  163.58    8.70
  -9  -2  -2  150.28    8.20
   9  -2   2  167.38    8.70
  -9   2   2  145.99    8.70
  -9   2   2  185.58    8.80
   9   2  -2  172.78    8.80
   9   2  -2  155.28    8.70
   9   2  -2  170.98    8.70
   9   2  -2  173.58    8.70
   9   2  -2  170.18    8.60
  -9  -2  -2  170.88    8.50
  -9  -2   2  159.88    8.90
   9   2   2  157.98    8.60
   9  -2  -2  146.89    8.60
   9  -2  -2  158.98    8.50
   9   2   2  167.98    8.70
   9  -2  -2  173.88    9.20
  -9   2  -2  171.08    8.50
   9   2   2  163.28    8.70
  -9  -2   2  163.98    8.30
   9   2   2  178.58    8.90
  -9   2  -2  165.68    8.70
  -9  -2   2  168.58    8.60
 -10  -2  -2   60.39    3.00
  10   2  -2   57.39    3.30
  10   2  -2   59.79    3.50
  10  -2   2   55.99    3.30
 -10  -2  -2   55.39    3.20
  10   2  -2   56.49    3.30
 -10   2   2   55.89    3.50
  10  -2   2   53.99    3.40
  10   2  -2   52.99    3.30
  10   2  -2   61.59    3.50
 -10  -2   2   55.99    3.40
 -10   2  -2   58.69    3.20
 -10   2  -2   53.19    3.30
  10  -2  -2   59.19    3.40
  10   2   2   56.99    3.30
 -10  -2   2   57.29    3.00
 -10  -2   2   54.89    3.20
  10   2   2   58.39    3.40
  10  -2  -2   51.39    3.50
 -11   2   2   16.50    1.20
  11   2  -2   15.70    1.20
 -11  -2  -2   15.80    1.20
 -11  -2  -2   16.30    1.10
  11  -2   2   14.40    1.10
 -11  -2   2   15.10    0.90
 -11  -2   2   16.30    1.20
  11   2   2   16.20    1.20
  11  -2  -2   16.10    1.20
 -11   2  -2   15.30    1.10
   0   3   2   72.59    4.90
   0   3  -2   79.49    5.90
   0  -3  -2   76.49    5.90
   0  -3   2   77.29    4.80
   0   3  -2   82.59    4.90
   0  -3   2   65.19    4.60
   0  -3   2   72.49    5.10
   0   3   2   68.39    4.20
   0   3  -2   71.99    4.60
   0  -3  -2   71.09    4.30
   0   3   2   79.59    4.40
   0   3   2   76.29    5.20
   1  -3   2  168.98    8.80
  -1   3   2  177.48    9.80
   1   3  -2  167.08    9.10
  -1  -3  -2  164.88    9.50
  -1  -3  -2  140.49   10.30
   1   3  -2  182.28    9.80
   1  -3   2  144.69    8.70
   1   3  -2  164.28    9.20
   1   3  -2  170.08    9.40
   1  -3   2  169.78    9.00
  -1   3   2  171.78    9.30
   1  -3   2  179.48   10.00
   1   3  -2  155.48   10.00
  -1   3   2  177.98    9.10
   1   3   2  187.68   10.00
   1  -3  -2  144.79    8.90
   1   3   2  149.99    9.60
  -1   3  -2  148.59    9.10
   1   3   2  166.08    9.10
   1  -3  -2  171.18   10.60
   1  -3  -2  171.88    9.40
  -1   3  -2  148.99    9.20
  -1   3  -2  172.28   10.60
  -1  -3   2  186.28    9.90
   2  -3   2  157.48    9.40
  -2  -3  -2  138.79    8.60
   2   3  -2  117.49    9.00
   2   3  -2  156.28    9.00
   2  -3   2  136.09    7.40
   2  -3   2  141.79    7.30
  -2   3   2  151.48    8.40
  -2   3   2  163.98    9.20
  -2   3   2  150.58    7.90
  -2  -3  -2  160.28    9.90
   2   3  -2  149.49    8.80
   2  -3   2  144.09    8.10
   2  -3   2  131.29    7.40
   2   3  -2  145.69    8.20
   2  -3  -2  152.08    9.70
  -2   3  -2  147.79    8.60
   2   3   2  151.58    9.50
  -2   3  -2  129.29    9.60
  -2  -3   2  139.59    8.50
   2   3   2  170.18    8.90
   2  -3  -2  140.59    7.40
   3   3  -2   87.79    6.40
  -3  -3  -2  102.39    6.50
   3  -3   2   85.89    5.60
  -3  -3  -2   95.09    6.70
   3   3  -2   98.09    7.30
  -3   3   2   91.59    5.40
   3  -3   2   90.19    4.90
  -3   3   2   96.59    6.70
   3   3  -2   89.49    6.50
   3  -3   2  100.59    7.10
  -3  -3  -2   95.09    7.00
  -3  -3  -2   83.69    4.70
  -3  -3   2   86.99    6.00
  -3  -3   2   88.99    5.60
  -3  -3   2   93.99    6.30
   3  -3  -2   97.39    6.90
   3   3   2   90.09    6.40
   3   3   2   93.89    7.10
   3  -3  -2   92.69    6.90
  -3   3  -2   97.09    6.30
   3  -3  -2   91.09    4.90
  -3   3  -2   77.39    7.00
   4  -3   2  107.99    5.80
   4   3  -2  122.89    8.20
   4  -3   2  115.49    6.00
  -4  -3  -2  107.29    5.90
   4   3  -2  121.89    9.10
   4   3  -2  105.19    7.70
  -4   3   2  116.69    8.20
  -4  -3  -2  132.59    8.00
  -4   3   2  112.39    7.20
   4  -3   2  113.79    8.50
  -4  -3  -2  123.59    8.30
  -4   3  -2  105.69    6.30
  -4   3  -2  103.89    8.50
  -4  -3   2  119.49    8.00
   4   3   2  112.09    8.80
  -4   3  -2  120.89    7.80
   4  -3  -2  108.69    7.90
  -4   3  -2  110.69    7.80
   4   3   2  122.39    8.20
   4  -3  -2  117.79    8.60
   4  -3  -2  106.59    6.40
   4  -3  -2   98.39    5.90
  -5  -3  -2   12.60    2.40
   5   3  -2   11.30    2.70
  -5   3   2    8.00    2.50
  -5  -3  -2    9.90    1.00
  -5  -3  -2   10.80    1.20
   5   3  -2   11.80    3.30
   5  -3   2    9.20    1.30
   5  -3   2    8.50    1.20
   5  -3   2   10.00    1.10
   5   3  -2    9.40    2.30
  -5  -3  -2   11.90    2.80
   5   3  -2    8.50    1.20
   5  -3   2    9.00    2.60
  -5   3  -2   10.70    2.40
  -5   3  -2    8.70    2.20
   5  -3  -2   16.90    3.40
   5   3   2   10.20    2.60
  -5  -3   2   10.10    2.60
  -5  -3   2   12.30    1.10
   6   3  -2   50.19    5.80
  -6   3   2   53.29    3.30
  -6  -3  -2   48.20    3.30
   6   3  -2   47.20    3.10
   6   3  -2   48.90    3.20
  -6   3   2   53.99    3.00
  -6   3   2   46.50    3.30
   6   3  -2   49.20    3.20
   6   3  -2   53.69    3.30
   6  -3   2   53.79    3.70
   6  -3   2   48.20    3.10
   6  -3   2   54.39    3.30
   6   3  -2   52.09    3.30
   6   3  -2   49.50    3.20
  -6  -3  -2   50.99    4.90
   6   3  -2   51.39    3.20
  -6  -3  -2   50.79    3.00
  -6   3  -2   50.09    3.00
   6  -3  -2   46.30    3.20
  -6   3  -2   52.19    5.30
   6  -3  -2   51.49    3.60
   6   3   2   48.70    3.30
   6   3   2   49.10    3.20
  -6   3  -2   52.79    3.10
  -6   3  -2   48.00    3.30
   6   3   2   50.49    5.60
  -6  -3   2   57.79    3.30
  -6  -3   2   47.80    2.90
   6   3   2   50.89    3.20
   6   3   2   52.29    3.00
   6  -3  -2   50.89    3.20
   6   3   2   47.50    3.30
   6   3   2   51.09    3.20
   7  -3   2   20.70    2.10
  -7  -3  -2   20.80    1.70
  -7   3   2   17.80    1.60
   7   3  -2   20.90    1.80
   7  -3   2   18.70    1.80
  -7  -3  -2   20.50    1.50
   7  -3   2   22.90    1.90
   7   3  -2   17.60    1.80
   7   3  -2   18.40    1.80
  -7  -3  -2   17.10    1.90
   7   3  -2   18.60    1.90
   7   3  -2   20.40    1.80
   7  -3   2   19.40    1.90
  -7   3   2   20.50    1.90
  -7   3   2   21.00    1.90
   7   3  -2   17.60    3.90
   7   3  -2   20.30    1.80
  -7   3  -2   20.80    1.60
   7   3   2   21.60    1.60
   7   3   2   18.50    2.00
   7  -3  -2   22.30    2.30
   7  -3  -2   20.90    1.90
   7   3   2   19.20    1.90
  -7   3  -2   18.60    1.90
   7   3   2   21.60    1.90
   7  -3  -2   18.40    1.80
  -7   3  -2   17.70    3.70
   7   3   2   20.60    1.90
   7   3   2   18.80    4.00
  -7  -3   2   22.50    1.70
   7   3   2   20.80    2.00
  -7   3  -2   18.10    1.60
  -7  -3   2   19.90    1.90
   8   3  -2   48.40    3.20
   8   3  -2   48.00    3.00
   8   3  -2   47.70    3.20
   8   3  -2   49.00    3.20
  -8  -3  -2   42.00    3.00
   8  -3   2   48.10    3.60
   8  -3   2   49.60    3.20
  -8   3   2   48.80    3.40
  -8  -3  -2   49.40    3.50
  -8   3   2   45.50    2.90
  -8   3   2   47.70    3.10
   8  -3   2   50.29    3.20
   8   3  -2   47.20    3.30
  -8  -3  -2   45.00    2.80
   8   3  -2   47.70    3.20
   8   3   2   49.50    3.20
   8  -3  -2   45.00    3.50
   8  -3  -2   50.29    3.30
   8   3   2   46.50    3.20
   8  -3  -2   51.29    3.30
  -8   3  -2   44.60    3.20
   8   3   2   50.89    3.30
  -8  -3   2   45.40    2.70
  -8  -3   2   48.70    3.30
   8   3   2   48.10    3.00
   8   3   2   49.20    3.20
  -8   3  -2   51.59    3.00
  -8  -3   2   46.10    2.90
   8   3   2   47.80    3.20
  -9   3   2   38.20    2.40
   9  -3   2   38.30    3.00
   9   3  -2   37.10    2.70
   9   3  -2   41.60    2.80
  -9  -3  -2   39.90    2.30
   9   3  -2   34.70    2.60
   9   3  -2   40.00    2.90
  -9  -3  -2   41.30    2.50
   9   3  -2   39.70    2.50
  -9  -3  -2   36.10    3.00
   9   3  -2   37.50    2.60
   9  -3   2   42.70    2.70
  -9  -3  -2   39.10    2.50
   9  -3   2   39.40    2.70
  -9   3   2   31.90    2.60
   9  -3  -2   37.10    2.50
   9   3   2   37.20    2.80
   9   3   2   38.90    2.80
   9   3   2   41.40    2.70
  -9   3  -2   36.30    2.60
   9  -3  -2   37.90    2.70
  -9  -3   2   42.80    2.60
   9  -3  -2   38.00    3.00
  -9   3  -2   39.60    2.60
   9   3   2   39.80    2.70
   9   3   2   39.10    2.70
  -9  -3   2   37.80    3.00
  -9  -3   2   40.40    2.40
 -10  -3  -2   24.60    1.50
 -10  -3  -2   18.80    1.60
 -10   3   2   23.10    1.70
 -10  -3  -2   22.10    1.50
  10   3  -2   23.00    1.80
  10   3  -2   22.30    1.80
  10  -3   2   20.50    1.50
  10   3  -2   24.10    1.70
  10  -3   2   20.20    1.70
  10   3  -2   21.90    1.70
  10  -3   2   18.20    1.70
 -10  -3   2   23.00    1.50
  10   3   2   24.60    1.90
  10  -3  -2   21.20    1.90
  10   3   2   21.30    1.70
 -10   3  -2   21.60    1.60
 -10  -3   2   24.00    2.00
  10   3   2   21.80    1.70
 -10  -3   2   23.80    1.70
  10  -3  -2   23.70    1.70
 -10   3  -2   23.50    1.60
   0  -4   2  910.61   43.50
   0   4  -2  876.81   42.70
   0  -4  -2  761.02   41.10
   0   4  -2  865.91   42.70
   0  -4  -2  887.71   42.10
   0   4   2  888.31   43.00
   0  -4  -2  920.71   44.90
   0  -4   2  837.52   42.30
   0   4  -2  839.92   44.40
   0   4   2  825.12   42.60
   0  -4   2  842.42   42.40
   1  -4   2  295.07   15.80
   1   4  -2  309.87   16.40
  -1   4   2  276.67   15.70
  -1  -4  -2  316.77   18.50
  -1   4   2  309.07   16.60
   1   4  -2  313.57   16.60
  -1   4   2  334.87   17.30
   1   4  -2  305.07   16.50
   1   4  -2  326.37   18.00
   1  -4   2  339.37   17.50
   1  -4  -2  317.77   18.40
   1   4   2  333.67   17.40
   1  -4  -2  264.17   16.30
   1   4   2  290.27   16.00
  -1   4  -2  328.47   18.50
  -1   4  -2  292.67   16.60
  -1   4  -2  280.97   16.40
  -1  -4   2  332.27   17.00
  -1  -4   2  328.57   17.00
   1  -4  -2  283.37   15.10
   1   4   2  326.57   17.20
   2  -4   2  525.95   28.20
   2  -4   2  519.25   25.50
   2   4  -2  523.95   27.40
   2   4  -2  536.55   27.60
   2   4  -2  502.05   26.90
  -2  -4  -2  477.15   25.40
  -2   4   2  556.34   27.30
  -2   4   2  575.54   28.10
  -2  -4  -2  510.15   27.50
  -2  -4  -2  522.05   29.00
  -2   4  -2  607.94   29.80
   2  -4  -2  537.75   27.70
  -2   4  -2  474.35   27.10
   2  -4  -2  536.55   29.10
   2   4   2  541.05   27.20
  -2   4  -2  523.75   27.40
  -2  -4   2  545.15   27.50
   2   4   2  468.05   27.90
  -2  -4   2  574.14   28.40
   2  -4  -2  514.75   25.60
   2   4   2  561.84   28.00
  -2  -4   2  506.65   28.10
   3  -4   2  502.05   24.10
   3  -4   2  515.45   27.20
  -3   4   2  507.95   25.80
   3   4  -2  480.75   27.30
  -3  -4  -2  475.85   23.90
  -3   4   2  515.25   26.70
  -3  -4  -2  492.55   26.20
   3   4  -2  504.75   26.20
  -3  -4  -2  457.95   27.20
  -3  -4  -2  503.65   26.80
  -3   4  -2  487.65   26.00
   3  -4  -2  490.75   27.50
  -3  -4   2  507.15   26.30
  -3   4  -2  501.55   26.10
  -3   4  -2  475.55   24.70
   3  -4  -2  497.95   26.70
   3   4   2  481.45   27.10
  -3  -4   2  477.75   25.30
  -3  -4   2  475.45   27.30
   3   4   2  521.15   26.30
   3  -4  -2  474.05   24.10
  -3   4  -2  535.35   28.30
   4  -4   2  125.49    9.30
  -4  -4  -2  119.79    8.90
  -4  -4  -2  111.39    6.10
  -4   4   2  104.09    8.50
   4   4  -2  131.09    8.90
   4   4  -2  111.39    8.20
   4  -4   2  124.49    6.30
  -4  -4  -2  120.19    8.20
   4  -4   2  117.79    6.10
  -4   4   2  118.59    7.80
   4   4  -2   94.99    9.00
   4  -4  -2  105.49    8.80
   4  -4  -2  118.89    9.10
   4  -4  -2  118.69    6.30
   4  -4  -2  119.69    6.50
  -4   4  -2  122.99    6.70
   4  -4  -2  111.09    6.00
   4   4   2  120.49    9.40
   4   4   2  119.99    8.60
  -4   4  -2  107.39    6.30
  -4   4  -2  119.19    8.40
  -4  -4   2  124.89    8.50
  -4   4  -2  117.09    9.60
  -4   4  -2  119.09    8.20
  -5   4   2  102.59   10.20
   5   4  -2  138.59    9.90
  -5  -4  -2  124.19    6.50
   5  -4   2  113.79   10.10
  -5  -4  -2  130.19    9.00
   5  -4   2  139.49    6.60
   5  -4   2  129.09    6.90
  -5  -4  -2  134.09    6.70
  -5  -4  -2  119.49    9.50
   5  -4   2  128.39    7.20
  -5  -4   2  129.49   10.80
  -5   4  -2  136.19    9.20
  -5  -4   2  115.99    9.20
   5  -4  -2  113.49    6.40
   5  -4  -2  124.39   10.00
  -5  -4   2  124.79    6.40
   5   4   2  134.49   10.80
  -5   4  -2  117.99    9.10
   5  -4  -2  120.79    7.00
   5   4   2  131.29    9.70
  -6  -4  -2   66.99    4.10
   6   4  -2   69.89    4.00
   6  -4   2   62.59    4.00
   6   4  -2   65.99    4.10
   6   4  -2   67.39    6.80
   6   4  -2   71.49    4.10
  -6  -4  -2   50.89    5.70
  -6  -4  -2   69.59    3.80
   6   4  -2   70.79    4.10
   6  -4   2   73.19    4.50
   6  -4   2   66.49    3.90
   6   4  -2   71.99    4.20
  -6   4   2   65.09    3.80
  -6   4   2   71.69    4.30
   6   4   2   60.39    4.10
   6   4   2   65.99    4.00
  -6   4  -2   63.39    6.10
  -6   4  -2   64.09    3.80
   6   4   2   62.39    6.60
  -6   4  -2   63.19    4.00
  -6   4  -2   68.79    3.90
   6   4   2   62.39    3.90
  -6  -4   2   69.19    3.90
  -6   4  -2   64.89    4.20
   6   4   2   59.89    3.70
   6   4   2   69.09    3.90
   6   4   2   60.49    4.10
   6  -4  -2   68.39    4.00
   6  -4  -2   64.59    3.50
   6  -4  -2   79.19    4.60
   6   4   2   72.39    4.20
   6  -4  -2   67.39    3.90
  -7  -4  -2  111.79    6.50
   7   4  -2  120.69    6.60
   7   4  -2  105.09    6.20
  -7   4   2  123.69    6.60
  -7  -4  -2  115.49    6.20
   7   4  -2  126.19    6.60
  -7   4   2  112.59    6.20
   7   4  -2  122.79    6.40
   7   4  -2  126.99    6.60
  -7  -4  -2  107.59    6.00
   7   4  -2  109.39    6.40
   7  -4   2  122.09    6.50
   7  -4   2  112.89    5.80
   7  -4   2  121.19    6.90
   7  -4  -2  118.59    6.30
   7  -4  -2  108.89    6.80
   7   4   2  111.89    6.60
  -7   4  -2  109.69    6.10
  -7  -4   2  121.59    6.50
  -7   4  -2  114.49    6.20
   7   4   2  117.29    6.50
   7   4   2  112.09    6.30
   7  -4  -2  119.99    6.50
   7   4   2  121.79    6.20
   7   4   2  126.49    6.50
  -7  -4   2  111.09    6.10
  -7   4  -2  111.39    6.40
   7   4   2  114.99    6.50
   8   4  -2  138.79    7.90
  -8  -4  -2  145.19    7.50
  -8   4   2  148.19    8.00
  -8   4   2  144.99    7.60
  -8  -4  -2  156.48    8.20
   8   4  -2  151.98    7.90
   8  -4   2  152.68    7.90
   8  -4   2  140.39    7.70
   8   4  -2  142.59    8.00
   8  -4   2  148.49    8.40
   8   4  -2  155.28    7.90
   8   4  -2  141.99    7.80
  -8  -4  -2  135.19    7.60
   8   4   2  146.79    7.90
   8   4   2  148.99    7.80
   8  -4  -2  158.48    7.90
  -8  -4   2  154.98    7.70
   8   4   2  148.39    7.90
   8   4   2  140.49    7.90
  -8  -4   2  149.88    8.00
   8  -4  -2  122.69    8.10
   8  -4  -2  152.18    7.80
  -8   4  -2  146.59    7.70
   8   4   2  157.78    7.60
   8   4   2  142.79    7.90
  -8   4  -2  144.59    7.80
   9   4  -2   18.40    1.80
   9   4  -2   21.00    1.80
  -9   4   2   20.10    1.50
   9  -4   2   18.20    1.70
   9  -4   2   18.30    2.10
  -9  -4  -2   18.50    1.60
  -9  -4  -2   17.70    2.10
   9   4  -2   21.10    1.80
  -9   4   2   17.10    1.90
  -9  -4  -2   20.50    1.50
   9   4  -2   19.60    1.70
  -9  -4  -2   20.90    1.40
   9   4  -2   20.80    1.70
  -9  -4   2   21.60    1.60
   9  -4  -2   20.30    1.60
   9   4   2   20.30    1.80
   9   4   2   21.70    1.70
  -9  -4   2   18.90    1.80
  -9  -4   2   20.20    1.40
  -9   4  -2   18.00    1.60
  -9   4  -2   17.90    1.70
   9   4   2   20.90    1.80
   9   4   2   22.00    1.70
   9  -4  -2   21.80    1.90
   9  -4  -2   19.40    2.10
   9   4   2   20.50    1.80
 -10  -4  -2   51.29    2.70
  10   4  -2   48.70    3.00
  10   4  -2   56.69    3.10
 -10  -4  -2   50.09    2.90
  10   4  -2   51.49    3.00
  10  -4   2   57.29    3.00
  10   4  -2   55.39    3.00
 -10   4   2   52.29    3.10
 -10  -4   2   53.99    3.10
  10  -4  -2   48.80    2.90
  10  -4  -2   43.80    3.20
  10  -4  -2   53.69    3.00
 -10  -4   2   50.29    2.90
 -10  -4   2   54.09    2.80
  10   4   2   50.29    2.90
  10   4   2   53.89    3.10
 -10   4  -2   52.89    2.90
  10   4   2   48.30    2.90
  10   4   2   52.09    3.00
   0   5  -2  313.47   16.90
   0   5   2  311.47   17.50
   0   5   2  284.57   16.30
   0   5   2  299.97   17.00
   0  -5  -2  303.17   14.90
   0   5  -2  306.77   16.80
   0  -5  -2  317.97   19.20
   0   5  -2  323.97   19.00
   0  -5   2  274.97   17.10
  -1   5   2  473.45   23.90
   1  -5   2  435.96   23.60
  -1  -5  -2  447.46   25.30
   1  -5   2  382.46   20.60
   1   5  -2  454.95   23.00
   1   5  -2  440.66   22.80
  -1  -5  -2  413.06   20.70
  -1   5   2  418.06   22.90
  -1   5  -2  405.36   21.10
  -1  -5   2  391.76   23.00
   1  -5  -2  369.46   22.30
   1   5   2  452.85   23.70
   1   5   2  430.76   23.20
  -1  -5   2  398.96   22.40
  -1  -5   2  469.75   25.00
   1  -5  -2  429.56   20.90
   1  -5  -2  452.85   25.40
  -1   5  -2  448.06   23.10
  -1   5  -2  455.15   23.10
  -2  -5  -2   45.10    2.50
  -2   5   2   45.50    4.60
  -2  -5  -2   47.50    5.50
  -2   5   2   43.00    4.20
   2   5  -2   48.10    4.10
   2  -5   2   46.50    4.70
   2  -5   2   45.90    2.70
  -2  -5  -2   46.50    4.40
  -2   5   2   41.30    2.80
   2   5  -2   45.30    4.20
   2   5   2   42.50    3.80
  -2  -5   2   49.50    4.70
  -2  -5   2   45.50    5.10
   2   5   2   45.50    4.60
   2  -5  -2   40.00    2.60
  -2   5  -2   44.50    4.20
  -2   5  -2   48.10    4.40
   2  -5  -2   46.80    2.80
   2  -5  -2   47.10    4.50
  -2  -5   2   43.10    4.20
  -2   5  -2   43.20    5.40
  -2   5  -2   41.60    2.90
   2  -5  -2   47.00    5.50
   2   5   2   45.80    4.70
  -2   5  -2   44.10    3.10
  -3   5   2  409.16   23.60
  -3  -5  -2  394.06   23.60
  -3   5   2  402.46   20.70
   3  -5   2  384.86   23.80
  -3  -5  -2  417.66   20.40
   3  -5   2  413.46   20.40
  -3   5   2  430.56   22.70
   3   5  -2  397.46   22.90
  -3  -5  -2  448.16   23.30
  -3  -5  -2  369.06   24.20
   3  -5   2  444.66   20.60
   3  -5  -2  432.16   23.70
  -3   5  -2  446.16   21.10
   3   5   2  400.16   20.70
  -3  -5   2  433.46   23.30
   3  -5  -2  406.56   20.80
   3  -5  -2  414.96   20.40
   3  -5  -2  438.76   20.70
  -3   5  -2  419.36   25.30
  -3  -5   2  438.66   24.30
   3   5   2  406.66   24.00
   3   5   2  421.26   22.70
  -3   5  -2  417.76   20.80
  -3   5  -2  467.85   23.30
  -3   5  -2  447.46   23.20
   3  -5  -2  394.56   24.70
  -4  -5  -2   41.20    2.40
  -4   5   2   32.20    4.00
   4  -5   2   41.20    2.70
   4   5  -2   39.90    4.50
  -4   5   2   39.90    4.70
  -4   5   2   36.30    2.60
  -4  -5  -2   31.60    4.20
   4  -5   2   33.80    4.80
   4  -5   2   34.80    2.40
  -4  -5  -2   40.40    4.90
  -4   5  -2   34.40    5.30
  -4  -5   2   34.00    4.20
   4   5   2   34.00    4.40
  -4  -5   2   35.30    5.00
  -4   5  -2   41.80    4.40
  -4   5  -2   38.70    2.70
   4  -5  -2   42.90    2.40
   4  -5  -2   32.40    4.80
   4   5   2   33.00    4.90
  -4   5  -2   34.10    4.10
  -4   5  -2   41.10    3.20
   4  -5  -2   34.50    4.90
   4  -5  -2   41.20    2.80
   4  -5  -2   40.50    2.60
  -5   5   2  158.98    8.30
   5   5  -2  160.08    8.50
   5   5  -2  151.28    8.30
  -5   5   2  162.58    8.60
   5  -5   2  165.48    8.60
   5   5  -2  157.58    8.50
  -5  -5  -2  150.98   11.00
  -5  -5  -2  155.38    8.10
  -5  -5  -2  166.58    8.40
   5  -5   2  168.88    8.30
   5   5  -2  160.28    8.40
  -5   5   2  157.28    8.20
   5   5  -2  149.99    8.30
   5  -5   2  152.08    8.40
   5   5  -2  175.38   11.80
   5  -5   2  174.08    9.00
   5   5   2  160.78    8.50
   5  -5  -2  161.88    8.80
   5   5   2  169.08   11.60
   5   5   2  168.78    8.30
  -5   5  -2  151.88    8.20
   5  -5  -2  163.08    8.20
   5   5   2  154.98    8.50
   5  -5  -2  157.08    8.50
   5  -5  -2  147.49    8.20
   5  -5  -2  169.08    8.00
  -5   5  -2  158.38    8.20
  -5   5  -2  163.38    8.20
  -5   5  -2  161.28   11.10
  -5   5  -2  166.88    8.60
   5   5   2  150.88    8.20
   5   5   2  143.19    8.50
   5   5   2  164.28    8.50
   5  -5  -2  161.58    8.50
  -5   5  -2  162.08    8.50
  -6  -5  -2  207.88   10.50
  -6   5   2  195.08   10.20
  -6   5   2  202.08   10.20
   6   5  -2  199.08   10.50
   6   5  -2  207.58   10.40
   6  -5   2  198.78   10.20
   6  -5   2  194.08   10.40
  -6   5   2  212.78   10.60
  -6  -5  -2  159.78   12.50
  -6  -5  -2  196.58   10.10
   6   5  -2  192.48   10.30
   6   5  -2  211.78   10.50
   6   5  -2  197.18   10.40
   6  -5   2  194.18   10.90
   6   5   2  202.88   10.20
   6  -5  -2  200.58    9.90
   6   5   2  203.88   10.50
  -6  -5   2  202.88   10.20
   6  -5  -2  213.38   10.50
   6   5   2  186.18   10.00
   6  -5  -2  188.98   10.20
   6   5   2  198.98   10.40
  -6   5  -2  196.18   14.50
  -6   5  -2  195.98   10.10
  -6   5  -2  193.88   10.30
   6   5   2  206.58   10.60
  -6   5  -2  212.38   10.20
   6   5   2  213.68   10.60
   6   5   2  186.88   15.00
   6  -5  -2  198.88   10.80
  -6   5  -2  215.08   10.70
  -7   5   2  100.39    5.50
  -7   5   2  106.29    6.00
  -7  -5  -2  105.49    5.90
   7   5  -2  102.49    5.80
   7   5  -2   97.89    5.90
   7   5  -2  105.39    5.80
   7  -5   2  105.09    5.80
   7   5  -2  105.59    6.00
   7   5  -2  103.89    5.90
   7  -5   2  104.99    5.30
   7  -5   2   91.89    6.10
  -7  -5  -2  102.69    5.60
   7   5   2  105.39    5.90
   7   5   2  106.79    5.90
  -7   5  -2  107.39    5.70
  -7  -5   2  102.99    5.80
   7   5   2  105.59    6.00
   7  -5  -2  102.69    5.80
  -7   5  -2   98.59    5.70
  -7  -5   2   95.39    5.40
   7  -5  -2  102.99    5.70
   7   5   2  105.69    5.90
   7   5   2  102.69    5.60
  -7   5  -2  100.99    5.50
   7   5   2  105.29    5.60
   7  -5  -2  100.19    6.20
   8   5  -2    0.50    0.60
   8   5  -2    1.00    0.80
   8   5  -2   -0.10    0.50
   8  -5   2    1.10    0.60
  -8  -5  -2    0.40    0.60
  -8  -5  -2    1.00    0.50
  -8   5   2    1.10    0.90
   8   5  -2    2.50    0.70
   8   5  -2    0.70    0.50
  -8  -5  -2    1.10    0.50
   8  -5   2    0.80    0.60
  -8   5   2    1.40    0.50
   8  -5   2   -0.20    0.90
   8  -5  -2    2.60    0.90
   8  -5  -2    1.10    0.80
   8   5   2    0.70    0.80
   8   5   2    1.30    0.90
   8   5   2    1.30    0.80
  -8  -5   2    2.70    0.90
   8  -5  -2    1.40    0.80
   8   5   2    0.70    0.90
  -8   5  -2    0.00    0.70
   8   5   2    0.50    0.40
  -8   5  -2    0.50    0.50
   8   5   2    3.50    0.80
  -8  -5   2    0.50    0.60
  -9   5   2   16.70    1.30
  -9   5   2   17.40    1.50
   9   5  -2   17.50    1.60
   9   5  -2   18.40    1.90
  -9  -5  -2   18.90    1.50
   9   5  -2   14.90    1.50
   9  -5   2   19.70    1.70
   9  -5   2   16.60    1.90
  -9  -5  -2   17.70    1.40
  -9  -5  -2   17.90    1.30
   9  -5   2   14.90    1.50
   9   5  -2   18.30    1.50
   9   5  -2   16.40    1.70
   9   5   2   17.70    1.50
  -9  -5   2   19.80    2.40
   9  -5  -2   18.30    1.50
   9  -5  -2   19.30    1.70
  -9  -5   2   18.80    1.40
  -9  -5   2   19.00    1.50
   9   5   2   20.80    1.70
   9   5   2   17.50    1.60
   9   5   2   20.00    1.60
   9  -5  -2   16.70    1.80
  -9   5  -2   18.00    1.50
   9   5   2   19.50    1.80
 -10  -5  -2   10.50    0.80
  10   5  -2    7.30    1.00
  10   5  -2   10.00    0.90
  10  -5   2   11.00    1.00
 -10   5   2   10.50    1.00
 -10  -5  -2    9.30    0.80
  10   5   2   10.90    1.00
  10  -5  -2    8.20    0.80
 -10  -5   2   10.50    0.80
  10  -5  -2    8.90    0.90
 -10  -5   2   10.40    1.00
  10   5   2   10.60    1.00
  10   5   2    8.90    0.90
 -10   5  -2   11.00    0.90
  10   5   2   10.10    1.00
  10   5   2   15.10    1.50
   0  -6  -2   67.99    3.70
   0   6  -2   63.29    4.00
   0   6  -2   66.39    4.00
   0   6  -2   58.19    5.40
   0  -6  -2   55.69    7.10
   0   6   2   71.59    6.30
   0  -6   2   64.39    6.00
   0   6  -2   65.89    5.70
   0  -6   2   63.79    7.00
   0   6   2   68.69    5.80
   0   6   2   71.59    4.00
   1  -6   2  114.49    6.00
   1   6  -2  111.59    8.30
  -1  -6  -2  115.59    6.10
   1  -6   2  105.59   10.00
   1   6  -2  116.69    6.50
   1  -6   2  101.49    8.60
  -1  -6  -2  120.09   10.50
   1   6  -2  106.59    8.20
  -1   6   2  111.49    6.50
  -1  -6  -2  125.19    8.70
  -1   6   2  128.09    8.70
  -1   6   2  119.29    9.10
  -1   6  -2  126.49    8.70
  -1   6  -2  132.99    6.60
   1   6   2  124.39    6.60
  -1  -6   2  122.99   10.30
   1  -6  -2  126.19   10.70
   1  -6  -2  131.19    6.40
   1   6   2  128.49    9.30
  -1   6  -2  123.29    6.70
  -1   6  -2  116.69    8.40
   1  -6  -2  108.89    6.10
  -1  -6   2  110.49    8.40
   2  -6   2  222.48   14.70
  -2   6   2  233.88   13.80
  -2  -6  -2  221.58   15.90
   2   6  -2  220.68   13.40
  -2  -6  -2  241.18   14.20
  -2   6   2  230.48   14.60
  -2  -6  -2  226.78   11.10
   2   6  -2  210.48   11.40
  -2   6   2  227.48   11.60
   2  -6   2  240.58   11.30
   2  -6   2  225.28   16.10
   2   6   2  217.48   14.30
   2  -6  -2  225.68   11.40
  -2  -6   2  187.68   14.90
   2  -6  -2  227.88   11.20
  -2   6  -2  230.28   11.60
   2   6   2  199.98   14.20
  -2   6  -2  230.98   11.70
  -2   6  -2  255.17   14.30
   2  -6  -2  236.58   16.50
  -2   6  -2  184.78   13.40
  -2  -6   2  209.88   13.80
   2   6   2  225.18   11.50
  -3   6   2   30.30    2.50
  -3   6   2   36.20    4.20
  -3   6   2   37.60    2.60
  -3  -6  -2   37.90    2.40
   3  -6   2   42.60    2.70
   3   6  -2   36.40    4.40
  -3  -6  -2   39.90    4.60
  -3   6   2   42.10    2.80
  -3  -6  -2   29.80    5.40
  -3   6   2   38.00    2.50
   3  -6   2   45.30    2.40
  -3   6   2   36.90    2.70
   3  -6  -2   35.20    5.50
   3   6   2   34.60    5.20
   3   6   2   37.00    2.40
   3   6   2   36.70    2.70
  -3   6  -2   39.20    2.50
   3   6   2   40.80    2.80
  -3   6  -2   37.80    2.80
  -3  -6   2   35.30    4.70
   3   6   2   37.90    2.40
  -3   6  -2   37.10    2.50
   3  -6  -2   36.40    2.60
  -3  -6   2   32.60    3.80
  -3  -6   2   45.50    8.00
  -3   6  -2   39.50    2.80
   3  -6  -2   40.90    2.50
   3  -6  -2   42.50    2.80
  -3   6  -2   41.20    4.80
   3   6   2   39.70    2.70
  -3   6  -2   38.10    2.50
  -3   6  -2   37.10    2.40
  -3   6  -2   34.40    4.30
   4   6  -2   54.99    3.60
  -4  -6  -2   63.39    6.00
  -4   6   2   60.69    3.40
  -4   6   2   61.29    3.80
   4   6  -2   56.99    3.70
  -4   6   2   60.19    5.60
   4   6  -2   61.89    3.70
   4   6  -2   56.89    3.60
  -4   6   2   58.29    3.50
  -4   6   2   60.59    3.90
  -4   6   2   54.49    3.50
  -4  -6  -2   60.29    3.50
  -4   6   2   63.39    3.90
   4  -6   2   62.69    4.00
   4  -6   2   57.59    3.80
  -4   6   2   62.79    3.60
   4  -6   2   62.49    3.50
   4  -6  -2   62.89    3.90
   4   6   2   61.19    3.80
   4   6   2   60.09    3.80
  -4   6  -2   58.69    3.60
   4   6   2   56.59    3.50
  -4   6  -2   59.89    3.90
  -4   6  -2   59.59    4.00
   4  -6  -2   69.59    3.60
  -4   6  -2   58.09    3.80
   4  -6  -2   62.19    3.80
  -4   6  -2   57.39    3.40
   4   6   2   63.29    3.50
  -4   6  -2   60.39    3.50
   4   6   2   52.49    3.50
  -4   6  -2   59.09    3.60
   4   6   2   61.49    3.80
  -4   6  -2   60.09    6.20
   5   6  -2  218.28   15.60
  -5   6   2  256.77   12.60
   5   6  -2  233.08   12.50
   5   6  -2  255.47   12.70
   5   6  -2  266.97   12.90
  -5   6   2  266.87   12.90
   5   6  -2  245.18   12.70
   5  -6   2  253.47   12.70
  -5  -6  -2  269.17   12.70
  -5   6   2  250.37   12.50
   5   6  -2  245.48   12.70
   5  -6   2  256.47   13.20
  -5  -6  -2  219.88   15.40
   5  -6   2  255.67   12.60
   5  -6   2  260.17   12.90
  -5   6  -2  246.48   12.50
   5   6   2  245.18   12.80
   5   6   2  256.57   12.80
  -5   6  -2  210.78   15.60
  -5   6  -2  247.78   12.90
   5   6   2  250.27   12.50
   5   6   2  253.57   12.70
  -5   6  -2  249.88   12.50
   5  -6  -2  245.08   12.80
  -5   6  -2  245.38   12.90
   5   6   2  202.18   15.30
   5   6   2  245.88   12.40
  -5   6  -2  230.18   12.50
   5  -6  -2  259.77   12.30
   5  -6  -2  257.27   12.50
   5   6   2  256.17   12.90
   5  -6  -2  250.87   12.80
   5  -6  -2  253.27   13.10
  -5   6  -2  259.07   12.60
  -6   6   2  333.47   16.50
  -6  -6  -2  337.97   16.50
   6  -6   2  300.47   16.30
   6   6  -2  319.17   16.40
   6  -6   2  337.57   16.20
  -6  -6  -2  313.97   16.10
  -6   6   2  312.47   16.10
   6   6  -2  321.97   16.30
  -6   6   2  317.47   16.20
   6   6  -2  324.77   16.40
   6   6  -2  329.07   16.40
   6   6  -2  334.17   16.50
   6  -6   2  286.77   16.70
  -6   6  -2  312.27   16.20
   6   6   2  301.67   16.00
   6  -6  -2  325.97   15.90
   6  -6  -2  340.07   16.50
   6   6   2  339.97   16.40
  -6  -6   2  327.67   16.20
   6  -6  -2  312.47   16.20
   6   6   2  335.67   16.20
  -6   6  -2  338.37   16.60
   6   6   2  341.47   16.50
  -6   6  -2  337.47   16.20
   6   6   2  330.87   16.60
   6   6   2  344.17   16.60
   6  -6  -2  336.17   16.80
  -6   6  -2  330.17   16.10
   7   6  -2   37.80    2.70
  -7   6   2   38.60    2.40
   7   6  -2   39.60    2.80
  -7  -6  -2   40.70    2.50
   7  -6   2   37.80    2.60
   7   6  -2   38.60    2.80
  -7   6   2   38.90    2.70
   7   6  -2   36.30    2.70
   7  -6   2   34.90    2.90
   7   6  -2   39.10    2.80
   7  -6   2   38.90    2.20
  -7  -6  -2   41.60    2.90
  -7   6  -2   37.90    2.40
   7  -6  -2   35.00    2.60
   7   6   2   35.60    2.80
  -7  -6   2   38.40    2.60
   7  -6  -2   39.50    3.00
   7   6   2   36.90    2.70
  -7   6  -2   35.60    2.50
   7   6   2   42.10    2.90
   7   6   2   32.80    2.80
   7  -6  -2   34.20    2.30
   7  -6  -2   39.10    2.50
   7   6   2   37.10    2.50
   8  -6   2   53.29    3.30
   8   6  -2   49.00    3.30
  -8   6   2   54.69    3.30
  -8   6   2   51.19    3.00
   8  -6   2   58.39    3.30
  -8  -6  -2   49.10    3.40
   8   6  -2   54.79    3.20
   8  -6   2   52.69    3.60
  -8  -6  -2   53.09    2.90
   8   6  -2   53.59    3.20
  -8  -6  -2   52.19    3.10
   8   6  -2   52.79    3.30
   8   6  -2   52.89    3.30
  -8  -6   2   48.30    3.30
  -8  -6   2   51.79    3.00
   8  -6  -2   49.80    3.20
   8   6   2   50.09    3.30
   8  -6  -2   54.49    3.10
   8  -6  -2   56.59    3.70
   8   6   2   55.39    3.40
  -8   6  -2   47.10    3.10
   8   6   2   55.19    3.40
   8   6   2   53.89    3.10
   8   6   2   47.10    3.30
   9   6  -2   44.70    2.60
   9   6  -2   45.00    2.70
  -9  -6  -2   43.80    2.50
  -9   6   2   37.50    2.40
  -9  -6  -2   44.80    2.50
  -9  -6  -2   47.50    2.40
  -9   6   2   35.50    2.60
   9   6  -2   44.50    2.60
   9   6  -2   42.70    2.50
   9  -6   2   41.60    2.90
   9  -6   2   39.90    2.50
   9   6  -2   42.00    2.70
   9  -6   2   46.50    2.60
  -9  -6   2   44.50    2.50
  -9   6  -2   47.10    2.50
   9   6   2   41.30    2.70
   9  -6  -2   43.60    2.50
   9   6   2   44.80    2.60
   9   6   2   46.20    2.60
   9   6   2   46.30    2.70
  -9  -6   2   44.60    2.40
   9  -6  -2   40.90    2.80
   9  -6  -2   38.40    2.50
   0   7   2   60.69    3.70
   0   7  -2   52.39    3.40
   0   7  -2   56.09    3.30
   0   7  -2   56.99    3.60
   0   7  -2   52.79    3.20
   0   7   2   49.20    3.30
   0   7   2   58.09    3.40
   0   7   2   58.09    3.60
   0   7  -2   53.09    3.60
   0   7  -2   54.59    3.20
   0   7   2   57.69    5.50
   0   7  -2   53.49    3.30
   0   7   2   51.89    3.20
   0   7   2   47.30    3.30
   0  -7  -2   59.19    3.30
   0   7   2   51.59    3.20
   0   7  -2   53.39    5.40
  -1  -7  -2  283.57   13.30
  -1   7   2  246.38   13.40
  -1   7   2  270.67   13.40
  -1   7   2  275.17   13.30
  -1   7   2  270.57   13.60
  -1   7   2  266.57   13.40
   1   7  -2  242.58   13.20
  -1   7   2  261.47   13.80
   1  -7   2  276.17   13.20
  -1   7   2  270.67   13.30
   1   7  -2  249.48   13.30
   1   7  -2  244.68   13.20
   1   7  -2  262.17   16.10
   1   7  -2  284.27   13.80
   1   7  -2  251.17   13.20
  -1   7   2  275.37   16.50
  -1  -7  -2  253.07   16.50
  -1   7  -2  257.57   13.80
   1   7   2  260.87   13.50
  -1   7  -2  255.57   13.30
   1   7   2  272.67   13.60
  -1   7  -2  281.47   13.80
   1   7   2  276.17   13.80
  -1   7  -2  262.37   13.30
   1  -7  -2  270.57   13.20
   1   7   2  277.37   13.40
  -1   7  -2  262.47   16.30
  -1   7  -2  245.48   13.50
   1  -7  -2  271.07   13.50
   1   7   2  267.07   13.30
  -1   7  -2  273.87   13.40
   1   7   2  289.27   13.40
  -1   7  -2  276.07   13.40
  -2   7   2   41.90    3.00
  -2   7   2   47.20    3.00
  -2  -7  -2   45.90    5.50
  -2   7   2   48.80    3.20
  -2   7   2   45.70    2.90
   2   7  -2   46.00    3.10
  -2  -7  -2   47.50    2.80
   2   7  -2   39.90    2.80
   2  -7   2   50.59    3.00
  -2   7   2   46.50    2.90
  -2   7   2   50.99    3.30
   2   7  -2   41.60    2.80
  -2   7   2   47.30    3.00
  -2   7   2   46.20    5.10
   2   7  -2   44.10    2.70
  -2   7  -2   48.80    2.90
   2   7   2   43.40    3.10
  -2   7  -2   51.89    3.40
   2   7   2   44.50    3.10
   2   7   2   43.80    2.80
  -2  -7   2   48.10    5.30
  -2   7  -2   44.80    2.90
  -2   7  -2   47.80    3.00
  -2   7  -2   46.10    3.10
   2   7   2   44.70    2.80
   2  -7  -2   46.80    2.80
  -2   7  -2   47.70    3.40
   2   7   2   42.90    3.10
  -2   7  -2   47.10    5.40
   2  -7  -2   40.10    3.00
  -2   7  -2   47.60    2.90
   2   7   2   47.20    2.90
   3   7  -2   26.50    2.10
  -3   7   2   28.20    2.00
  -3  -7  -2   28.40    4.70
  -3   7   2   31.90    2.20
  -3   7   2   28.90    2.10
   3   7  -2   26.90    2.10
  -3  -7  -2   29.80    2.10
  -3   7   2   24.90    2.40
   3  -7   2   28.40    2.00
   3  -7   2   28.40    2.20
  -3   7   2   28.80    4.10
  -3   7   2   32.80    2.20
  -3   7   2   31.10    2.50
   3   7  -2   28.00    2.00
  -3   7   2   31.80    2.50
   3   7   2   29.00    2.30
  -3   7  -2   26.90    4.10
   3   7   2   31.90    2.10
   3   7   2   30.40    2.30
  -3   7  -2   31.20    2.60
   3   7   2   31.50    2.20
  -3   7  -2   30.70    3.00
  -3   7  -2   31.20    2.20
   3   7   2   30.70    2.20
  -3   7  -2   27.00    2.20
  -3   7  -2   29.30    2.20
   3  -7  -2   29.80    2.30
   3  -7  -2   31.50    2.20
  -3   7  -2   30.70    2.10
  -3   7  -2   32.10    2.10
   3   7   2   31.60    2.40
  -3   7  -2   31.50    2.50
  -4   7   2  182.78    9.20
   4   7  -2  173.28    9.30
   4   7  -2  165.68    9.30
  -4  -7  -2  187.28    9.30
   4  -7   2  179.98    9.60
  -4   7   2  184.98    9.30
   4  -7   2  185.18    9.90
  -4   7   2  168.38    9.20
   4   7  -2  173.68    9.40
   4  -7   2  183.98    9.30
  -4   7   2  179.18    9.60
  -4   7   2  192.78    9.60
  -4   7   2  177.68    9.30
   4   7   2  188.18    9.50
   4   7   2  177.48    9.20
   4   7   2  174.38    9.20
  -4   7  -2  174.88    9.20
   4  -7  -2  178.58    9.20
  -4   7  -2  187.28    9.70
  -4   7  -2  183.68    9.80
  -4   7  -2  178.28    9.30
   4   7   2  179.58    9.50
  -4   7  -2  182.38    9.20
   4  -7  -2  176.88    9.00
   4  -7  -2  184.88    9.60
  -4   7  -2  170.88    9.30
   4   7   2  175.18    9.50
   4  -7  -2  180.48    9.70
   5  -7   2   11.60    1.40
   5   7  -2   10.70    1.30
   5   7  -2   10.40    1.30
   5   7  -2   11.50    1.40
  -5   7   2    8.80    1.40
  -5   7   2   13.00    1.40
   5  -7   2   10.20    1.80
   5   7  -2   10.80    1.30
   5  -7   2    8.60    1.40
   5  -7   2   11.50    1.60
  -5   7   2    8.90    1.20
  -5  -7  -2   14.70    1.50
  -5   7  -2   11.10    1.20
  -5   7  -2   10.20    1.20
  -5   7  -2    8.00    1.20
   5   7   2   10.00    1.10
   5  -7  -2    8.70    1.50
   5   7   2   10.20    1.10
   5   7   2    7.90    1.20
  -5   7  -2   11.90    1.30
   5  -7  -2   10.80    1.30
   5  -7  -2   10.50    1.20
   5   7   2   10.20    1.40
  -5   7  -2   10.60    1.50
   5  -7  -2   12.00    1.50
   5   7   2   11.50    1.60
   5  -7  -2   10.70    1.40
  -5   7  -2   10.20    1.70
   5   7   2   11.10    1.40
   6  -7   2    5.20    1.00
  -6   7   2    5.90    0.90
  -6  -7  -2    5.50    1.00
   6   7  -2    4.30    1.00
   6  -7   2    8.40    2.30
   6   7  -2    4.90    1.00
  -6  -7  -2    5.60    0.80
  -6   7   2    5.60    0.90
   6  -7   2    5.30    1.20
   6   7  -2    5.10    1.00
   6  -7   2    5.90    1.40
   6   7  -2    6.20    1.20
  -6   7   2    6.20    1.10
  -6   7  -2    5.30    1.20
   6   7   2    7.20    1.20
   6   7   2    7.30    1.10
  -6  -7   2    5.30    0.90
   6  -7  -2    6.20    1.20
  -6   7  -2    6.10    1.00
   6   7   2    7.90    1.40
  -6   7  -2    5.50    0.90
   6   7   2    6.20    1.10
   6   7   2    4.80    0.90
   6  -7  -2    4.80    1.30
   6   7   2    6.60    0.90
  -6   7  -2    5.30    0.90
   6  -7  -2    5.20    0.70
   7  -7   2   23.30    1.90
   7  -7   2   22.20    1.40
  -7   7   2   22.80    2.00
  -7  -7  -2   21.80    1.70
   7   7  -2   21.80    2.10
  -7  -7  -2   21.80    1.80
   7  -7   2   23.70    2.20
   7   7  -2   21.40    1.90
   7  -7   2   20.50    1.80
   7   7  -2   21.20    1.70
  -7   7   2   22.80    1.60
   7   7  -2   20.90    1.80
   7   7   2   21.30    1.90
  -7  -7   2   22.10    1.80
   7   7   2   24.40    1.80
   7  -7  -2   21.90    1.60
   7  -7  -2   17.70    1.70
   7   7   2   20.10    1.60
   7   7   2   20.20    1.90
  -7   7  -2   20.10    1.70
  -7   7  -2   22.20    1.70
   7  -7  -2   23.40    2.20
   7   7   2   19.40    1.80
   8   7  -2   25.30    1.80
   8  -7   2   24.50    1.80
   8  -7   2   27.50    2.10
   8   7  -2   26.10    1.90
   8   7  -2   26.60    2.00
  -8  -7  -2   26.70    1.80
  -8   7   2   23.90    1.60
   8   7  -2   25.30    1.90
  -8  -7  -2   27.20    1.70
  -8   7   2   25.90    1.90
   8  -7   2   26.10    1.80
   8   7   2   25.90    1.70
   8   7   2   26.10    1.80
   8   7   2   27.30    1.90
   8  -7  -2   25.10    2.00
   8   7   2   27.80    2.00
  -8   7  -2   26.40    1.70
   8  -7  -2   25.10    1.90
  -8  -7   2   23.00    1.70
   8   7   2   25.40    1.90
  -9  -7  -2    0.40    0.30
  -9   7   2    0.00    0.30
   9  -7   2    0.10    0.30
   9   7  -2    0.40    0.40
  -9   7   2    0.40    0.40
  -9  -7  -2    0.30    0.30
   9   7  -2    0.20    0.30
   9   7  -2    0.00    0.40
   9   7  -2    0.50    0.40
   9  -7  -2    0.20    0.40
   9   7   2    0.10    0.40
  -9   7  -2    0.30    0.30
   9   7   2    0.30    0.40
   9   7   2    0.70    0.40
   9   7   2    0.00    0.30
   0   8  -2   75.49    4.30
   0   8   2   80.49    4.30
   0  -8  -2   79.79    4.40
   0   8   2   75.39    4.30
   0   8  -2   72.89    4.20
   0   8   2   78.99    4.40
   0   8  -2   72.99    4.40
   0   8   2   71.49    4.60
   0   8  -2   78.49    4.70
   0   8   2   72.49    4.50
   0  -8   2   71.39    4.10
   0  -8  -2   66.29    7.90
   0   8   2   68.29    4.30
   0   8  -2   64.29    6.60
   0   8   2   75.99    4.20
   0   8  -2   70.19    4.40
   0  -8  -2   66.59    4.00
   0   8  -2   75.39    4.20
  -1   8   2   91.09    5.40
  -1   8   2   87.49    5.70
  -1   8   2   92.19    5.30
  -1  -8  -2   96.09    5.30
   1   8  -2   86.69    5.10
   1   8  -2   94.29    5.10
   1   8  -2   93.09    5.10
   1  -8   2   93.69    5.10
   1   8  -2  104.09    5.70
  -1   8   2   94.89    5.20
   1   8  -2   89.99    5.20
  -1   8   2   97.39    5.30
  -1   8   2   92.39    5.20
  -1   8   2   95.69    5.20
  -1   8  -2   95.69    5.30
  -1   8  -2   94.59    5.40
  -1   8  -2   89.79    5.70
   1   8   2   94.59    5.20
  -1   8  -2   88.19    5.20
   1   8   2   90.29    5.30
   1  -8  -2   96.09    5.40
   1   8   2   96.09    5.30
   1  -8  -2   90.49    5.10
  -1   8  -2   97.09    5.20
   1   8   2   97.39    5.20
  -1   8  -2   95.19    5.70
  -1   8  -2   97.19    5.10
   1   8   2   95.89    5.60
   1   8   2   93.59    5.50
  -2   8   2   54.99    3.40
   2  -8   2   60.99    3.50
   2   8  -2   52.29    3.20
   2  -8   2   48.70    3.10
  -2   8   2   56.19    3.50
  -2   8   2   56.39    3.90
   2   8  -2   50.99    3.60
  -2   8   2   50.79    3.30
  -2   8   2   58.69    3.60
  -2   8   2   55.09    3.30
   2   8  -2   50.89    3.30
   2   8  -2   50.69    3.10
   2   8   2   57.19    3.50
   2   8   2   54.99    3.60
  -2   8  -2   56.69    3.40
   2   8   2   53.19    3.30
  -2   8  -2   54.59    3.30
  -2   8  -2   53.59    3.50
   2   8   2   52.99    3.70
   2  -8  -2   55.39    3.30
   2   8   2   52.39    3.30
  -2   8  -2   59.09    3.90
   2   8   2   53.09    3.30
   2  -8  -2   54.79    3.60
  -2   8  -2   50.89    3.70
  -2   8  -2   48.70    4.00
  -2   8  -2   56.39    3.40
  -3   8   2   68.69    3.90
  -3   8   2   70.59    4.20
  -3   8   2   66.69    4.00
   3  -8   2   67.59    4.50
   3  -8   2   67.29    3.90
   3  -8   2   68.79    4.10
   3   8  -2   59.39    4.00
  -3   8   2   68.09    3.90
  -3   8   2   65.89    4.00
  -3   8   2   64.89    4.30
  -3  -8  -2   68.09    4.00
   3   8  -2   62.89    3.80
   3  -8  -2   66.39    4.10
   3  -8  -2   67.29    4.30
  -3   8  -2   67.29    3.90
  -3   8  -2   70.69    4.10
  -3   8  -2   67.89    4.40
   3   8   2   68.19    3.90
   3   8   2   71.49    4.40
   3  -8  -2   66.99    3.90
  -3   8  -2   67.49    3.90
  -3   8  -2   69.09    4.60
  -3   8  -2   69.29    4.10
   3   8   2   70.79    3.90
   3   8   2   64.89    4.00
   3  -8  -2   64.89    3.70
   3   8   2   66.09    4.20
   3   8   2   61.59    3.80
   3   8   2   67.09    4.20
  -4   8   2   87.59    4.80
   4  -8   2   87.09    5.20
  -4   8   2   85.29    4.90
   4   8  -2   78.89    4.90
   4   8  -2   97.99    5.10
  -4   8   2   89.99    5.00
   4  -8   2   86.39    4.90
  -4   8   2   89.89    5.30
   4  -8   2   79.99    5.40
   4   8  -2   81.69    4.90
  -4   8   2   88.79    5.10
  -4  -8  -2   89.69    5.00
  -4   8   2   89.59    4.90
  -4   8  -2   86.39    5.40
  -4   8  -2   91.19    4.90
   4   8   2   89.99    4.80
   4  -8  -2   82.09    4.80
   4  -8  -2   87.09    5.30
   4   8   2   89.69    5.10
   4  -8  -2   82.89    5.00
   4   8   2   86.19    4.80
  -4   8  -2   87.19    5.00
  -4   8  -2   88.39    5.00
   4  -8  -2   84.49    4.60
   4   8   2   85.99    5.20
  -4   8  -2   81.99    4.80
  -4   8  -2   94.89    5.40
   4   8   2   86.39    5.10
   5   8  -2   81.09    4.70
   5  -8   2   76.99    4.90
   5   8  -2   81.09    4.60
  -5   8   2   83.29    4.60
  -5  -8  -2   78.59    4.40
   5  -8   2   85.89    5.10
  -5   8   2   78.89    4.40
  -5  -8  -2   79.79    4.70
   5   8  -2   78.29    4.60
  -5   8   2   80.49    4.50
   5  -8   2   82.69    4.60
  -5   8   2   82.79    4.80
   5  -8   2   77.29    4.50
   5   8   2   75.19    4.70
   5   8   2   84.09    4.90
  -5   8  -2   71.39    4.80
   5  -8  -2   75.29    4.30
   5   8   2   83.29    4.50
  -5   8  -2   84.69    4.60
  -5   8  -2   83.09    4.50
  -5   8  -2   76.89    4.50
   5  -8  -2   85.49    4.80
   5   8   2   79.39    4.40
   5   8   2   82.39    4.80
  -5   8  -2   80.89    4.50
   5  -8  -2   77.09    4.40
  -5   8  -2   80.29    4.90
  -6  -8  -2   55.19    3.20
   6  -8   2   57.69    3.90
  -6  -8  -2   57.99    3.50
   6  -8   2   55.79    3.40
  -6   8   2   59.69    3.40
  -6   8   2   58.49    3.40
  -6   8   2   56.39    3.50
   6   8  -2   59.69    3.40
   6   8  -2   55.39    3.30
   6   8  -2   52.79    3.30
   6   8  -2   55.99    3.50
   6  -8   2   56.89    3.40
   6   8   2   47.40    3.40
  -6   8  -2   50.99    3.30
   6   8   2   61.39    3.60
   6  -8  -2   60.79    3.50
   6   8   2   60.89    3.30
   6  -8  -2   57.49    3.60
   6  -8  -2   57.89    3.00
   6   8   2   53.69    3.20
  -6   8  -2   58.79    3.40
  -6   8  -2   58.39    3.30
   6   8   2   52.29    3.50
  -7   8   2   58.19    3.30
  -7   8   2   64.29    3.60
   7  -8   2   61.99    3.60
   7   8  -2   60.09    3.40
   7   8  -2   55.99    3.40
   7  -8   2   54.89    3.30
  -7  -8  -2   62.09    3.40
   7   8  -2   63.19    3.60
   7  -8   2   61.89    3.90
   7  -8   2   61.79    3.10
   7   8  -2   66.19    3.60
   7   8   2   57.69    3.40
   7   8   2   59.29    3.70
   7  -8  -2   58.89    3.30
   7   8   2   63.69    3.60
   7   8   2   61.49    3.60
   7  -8  -2   62.19    3.60
  -7   8  -2   61.29    3.30
   7  -8  -2   55.59    3.60
  -7   8  -2   62.89    3.40
   7   8   2   62.99    3.30
   8   8  -2   49.90    2.90
   8   8  -2   50.79    2.80
   8   8  -2   51.59    2.90
   8   8  -2   41.90    2.80
  -8   8   2   49.50    2.70
   8  -8   2   49.30    2.70
  -8  -8  -2   51.99    2.70
   8  -8   2   51.59    2.90
  -8   8  -2   56.39    2.80
   8   8   2   50.19    2.90
   8   8   2   51.29    2.70
   8  -8  -2   59.09    2.90
   0   9   2  113.59    7.00
   0   9   2  116.89    6.50
   0   9   2  118.49    6.50
   0   9   2  121.39    6.40
   0  -9  -2  127.99    6.70
   0  -9   2  111.19    6.30
   0   9   2  128.39    6.80
   0   9   2  113.79    6.40
   0   9  -2  123.89    6.60
   0  -9  -2  118.49    6.30
   0   9  -2  124.89    6.50
   0   9  -2  124.09    6.40
   0   9  -2  120.39    6.50
   0   9   2  123.29    6.50
   0   9  -2  120.89    7.00
  -1   9   2  127.29    6.70
   1   9  -2  124.49    6.60
  -1  -9  -2  127.59    6.80
  -1   9   2  133.89    7.00
   1   9  -2  123.19    6.60
   1   9  -2  130.69    7.20
  -1   9   2  126.19    6.80
  -1  -9  -2  119.29    6.50
   1   9  -2  121.99    6.60
  -1   9   2  125.19    6.70
  -1   9   2  128.59    6.70
  -1   9   2  108.69    7.10
   1  -9   2  125.89    6.70
   1   9  -2  126.29    6.70
  -1   9  -2  114.79    7.10
  -1   9  -2  130.69    6.70
   1   9   2  126.49    7.00
   1   9   2  122.29    6.70
  -1   9  -2  124.69    6.80
  -1   9  -2  129.59    7.00
   1   9   2  125.79    6.90
   1   9   2  126.69    6.80
   1   9   2  121.19    6.70
   1  -9  -2  125.09    6.60
   1   9   2  122.99    7.20
  -1   9  -2  126.49    6.80
   1  -9  -2  128.69    6.90
  -1   9  -2  132.69    6.70
   2   9  -2   26.40    2.30
  -2   9   2   28.30    2.30
   2  -9   2   27.30    2.20
   2   9  -2   28.40    2.10
  -2   9   2   32.90    2.60
  -2   9   2   27.80    2.10
   2   9  -2   29.60    2.00
  -2   9   2   28.30    2.30
  -2   9   2   29.60    2.20
  -2  -9  -2   27.60    2.20
   2   9  -2   26.10    2.20
   2  -9   2   27.80    2.00
  -2   9   2   29.60    2.10
  -2   9  -2   28.40    2.20
   2   9   2   30.10    2.40
   2  -9  -2   27.30    1.90
  -2   9  -2   29.40    2.10
   2   9   2   30.50    2.30
   2   9   2   29.70    2.40
   2   9   2   29.80    2.20
  -2   9  -2   29.30    2.40
   2  -9  -2   31.10    2.30
   2   9   2   28.60    2.20
   2  -9  -2   31.40    2.20
  -2   9  -2   27.20    2.60
  -2   9  -2   29.60    2.70
   2   9   2   31.50    2.20
  -2   9  -2   30.80    2.10
   3  -9   2   19.90    2.00
   3  -9   2   15.90    1.80
  -3   9   2   16.50    1.60
  -3   9   2   19.90    2.10
  -3   9   2   17.00    1.50
   3   9  -2   17.10    1.50
  -3   9   2   19.50    1.80
  -3   9   2   16.30    1.50
  -3   9   2   18.60    1.70
   3   9  -2   15.10    1.40
  -3  -9  -2   16.90    1.70
   3  -9   2   19.20    1.70
   3   9   2   18.10    1.70
   3   9   2   16.90    1.50
   3   9   2   18.30    1.80
  -3   9  -2   17.80    1.70
   3   9   2   15.10    1.80
   3  -9  -2   16.30    1.70
   3  -9  -2   17.40    1.60
   3   9   2   17.50    1.60
  -3   9  -2   16.50    1.60
   3  -9  -2   16.20    1.40
  -3   9  -2   19.70    2.00
   3   9   2   20.00    1.70
   3  -9  -2   18.90    1.80
  -3   9  -2   17.80    1.80
  -3   9  -2   16.90    1.50
  -3   9  -2   19.80    2.20
  -4   9   2   51.99    3.00
  -4   9   2   54.09    3.10
   4  -9   2   46.80    3.30
   4  -9   2   49.40    3.30
  -4   9   2   48.10    3.30
   4  -9   2   50.69    3.40
  -4   9   2   40.40    3.00
  -4   9   2   50.69    3.00
  -4  -9  -2   46.10    3.10
   4   9  -2   45.20    3.10
  -4   9   2   51.69    3.20
  -4   9  -2   50.49    3.00
  -4   9  -2   50.09    3.20
   4  -9  -2   51.19    3.10
   4   9   2   52.29    3.20
  -4   9  -2   49.70    3.50
   4   9   2   50.99    3.00
   4  -9  -2   49.00    3.00
   4  -9  -2   46.10    3.40
   4   9   2   51.09    3.00
   4   9   2   50.99    3.30
  -4   9  -2   53.09    3.20
  -4   9  -2   51.59    3.50
   4   9   2   47.00    3.10
   4  -9  -2   50.59    2.90
  -4   9  -2   50.29    3.10
  -5  -9  -2    1.90    0.70
   5  -9   2    3.30    0.80
   5   9  -2    1.70    0.70
  -5  -9  -2    2.60    0.60
   5   9  -2    1.20    0.50
   5  -9   2    2.90    0.90
  -5   9   2    3.10    0.60
  -5   9   2    2.10    0.70
  -5   9   2    3.80    0.70
  -5   9   2    2.70    0.60
   5  -9   2    1.90    0.70
  -5   9   2    3.20    0.80
  -5   9  -2    3.60    0.80
  -5   9  -2    4.10    0.70
  -5   9  -2    3.00    0.80
  -5   9  -2    2.40    0.80
   5  -9  -2    2.10    0.60
   5  -9  -2    3.30    0.80
   5   9   2    2.80    0.90
   5   9   2    2.50    0.70
  -5   9  -2    4.40    0.80
   5   9   2    2.50    0.80
   5   9   2    2.90    0.70
   5  -9  -2    3.00    0.60
   5   9   2    2.20    0.90
  -5   9  -2    2.40    0.90
   6  -9   2    3.30    0.80
   6  -9   2    5.20    0.80
  -6   9   2    5.70    0.70
   6   9  -2    2.60    0.80
   6  -9   2    3.80    0.70
   6   9  -2    4.70    0.80
  -6   9   2    3.60    0.70
  -6  -9  -2    4.20    0.60
   6   9  -2    4.90    0.70
   6  -9   2    4.60    0.60
   6   9   2    3.70    0.70
  -6   9  -2    3.50    0.70
   6   9   2    3.50    0.70
   6  -9  -2    4.20    0.50
   6  -9  -2    5.00    0.70
  -6   9  -2    2.80    0.70
   6   9   2    5.40    0.90
  -6   9  -2    4.10    0.80
   6  -9  -2    5.90    0.90
   6   9   2    3.50    0.80
   7   9  -2    4.40    0.60
   7   9  -2    3.60    0.50
  -7   9   2    2.60    0.50
   7   9   2    2.40    0.40
  -7   9  -2    1.30    0.30
  -7   9  -2    2.40    0.40
   7  -9  -2    3.50    0.40
   7   9   2    3.40    0.60
   7  -9  -2    1.70    0.50
   7   9   2    2.00    0.60
   7   9   2    3.10    0.60
   0  10   2  155.58    7.90
   0  10  -2  145.89    7.60
   0  10   2  129.69    7.50
   0  10   2  142.59    7.70
   0  10   2  154.38    8.10
   0  10  -2  153.58    7.50
   0  10  -2  148.79    7.70
   0 -10  -2  157.08    7.60
   0  10  -2  161.08    8.20
   0  10   2  143.79    7.50
   0  10  -2  151.58    7.60
   0  10   2  123.69    7.50
   0 -10   2  137.39    7.60
  -1 -10  -2    8.20    1.00
   1  10  -2    6.40    1.20
   1 -10   2    7.20    1.00
  -1  10   2    7.00    1.00
   1 -10   2    8.10    1.10
  -1  10   2    9.10    1.10
  -1  10   2    8.10    1.00
  -1  10   2   10.20    1.30
   1  10  -2    8.70    0.90
   1  10  -2    8.40    1.00
  -1  10   2    7.40    1.00
  -1 -10  -2   10.70    1.30
  -1  10   2    8.20    1.30
   1  10  -2    7.90    1.00
   1  10  -2    8.90    1.10
  -1  10  -2    6.50    1.10
   1  10   2    7.80    1.10
   1  10   2    9.90    1.40
  -1  10  -2    9.60    1.50
  -1  10  -2   10.00    1.10
  -1  10  -2    5.40    1.10
   1  10   2    7.90    1.00
  -1  10  -2    9.40    1.00
   1  10   2    8.70    1.20
   1 -10  -2    7.60    0.90
   1  10   2    5.90    0.90
   1  10   2    6.20    1.00
   1 -10  -2    8.10    1.20
  -2 -10  -2    4.60    0.80
  -2  10   2    5.10    1.10
   2 -10   2    3.90    1.00
   2  10  -2    3.60    0.80
  -2  10   2    5.30    1.10
   2  10  -2    5.50    0.70
  -2  10   2    6.10    0.90
   2  10  -2    4.80    0.90
  -2 -10  -2    5.80    0.80
  -2  10   2    5.10    0.80
   2  10  -2    3.20    0.80
   2 -10   2    6.00    0.80
  -2  10   2    4.10    0.90
  -2  10   2    5.20    0.80
   2  10   2    5.80    1.00
   2  10   2    5.10    0.90
   2  10   2    3.90    0.90
   2 -10  -2    5.40    0.80
  -2  10  -2    6.10    0.90
   2  10   2    4.90    0.90
   2 -10  -2    5.70    0.70
  -2  10  -2    6.50    1.30
  -2  10  -2    5.90    1.00
  -2  10  -2    6.30    0.80
   2 -10  -2    6.10    1.00
   2  10   2    4.20    0.80
  -2  10  -2    6.80    1.20
   2  10   2    4.50    0.80
  -2  10  -2    4.40    0.90
  -3 -10  -2   68.39    4.10
  -3  10   2   81.09    4.10
  -3  10   2   76.59    4.10
  -3  10   2   71.09    4.20
   3 -10   2   69.69    4.20
  -3  10   2   75.79    4.10
  -3  10   2   70.29    4.10
  -3 -10  -2   66.79    3.90
  -3  10   2   73.99    4.50
   3 -10   2   75.49    4.20
   3  10   2   75.29    4.00
  -3  10  -2   75.89    4.30
   3  10   2   64.29    3.90
  -3  10  -2   68.79    4.10
  -3  10  -2   73.49    4.00
  -3  10  -2   73.39    4.20
   3  10   2   73.09    4.20
   3 -10  -2   74.69    4.10
  -3  10  -2   63.59    4.10
   3  10   2   74.59    4.00
   3  10   2   72.89    4.20
  -3  10  -2   76.39    4.50
   3 -10  -2   75.49    3.80
  -4  10   2   18.50    1.40
  -4  10   2   15.80    1.60
  -4 -10  -2   18.00    1.40
  -4  10   2   19.80    1.50
  -4  10   2   18.50    1.50
   4 -10   2   18.00    1.70
  -4  10   2   17.60    1.30
  -4  10   2   19.90    1.50
  -4  10  -2   19.60    1.50
   4  10   2   18.60    1.60
   4  10   2   21.10    1.60
   4  10   2   18.60    1.40
  -4  10  -2   20.20    1.50
  -4  10  -2   18.50    1.70
   4 -10  -2   19.60    1.40
  -4  10  -2   19.30    1.40
   4  10   2   18.70    1.50
   4 -10  -2   17.70    1.40
  -4  10  -2   17.40    1.50
   4 -10  -2   17.50    1.50
  -5  10   2   16.40    1.30
  -5  10   2   16.80    1.30
   5 -10   2   17.90    1.40
   5 -10   2   18.20    1.20
   5 -10   2   17.00    1.30
  -5  10  -2   18.20    1.40
  -5  10  -2   16.00    1.30
   5  10   2   19.80    1.60
  -5  10  -2   20.50    1.30
   5  10   2   16.70    1.20
   5 -10  -2   18.50    1.20
   5  10   2   20.50    1.40
  -5  10  -2   17.80    1.30
   5  10   2   18.10    1.30
  -5  10  -2   19.60    2.00
   5 -10  -2   19.00    1.40
   0  11  -2    3.70    0.80
   0  11  -2    3.60    0.80
   0  11   2    3.50    0.60
   0  11   2    3.40    0.80
   0  11   2    3.00    0.70
   0 -11  -2    3.80    0.70
   0  11  -2    4.10    0.60
   0  11   2    3.70    0.70
   0  11   2    2.30    0.70
   0  11  -2    2.70    0.50
   0  11  -2    2.90    0.60
  -1 -11  -2   84.79    4.40
  -1  11   2   92.19    4.50
  -1  11   2   81.39    4.50
  -1  11   2   82.99    4.80
   1  11  -2   83.99    4.30
  -1  11   2   85.19    4.50
   1 -11   2   75.79    4.30
   1  11  -2   84.69    4.40
   1  11  -2   80.49    4.30
  -1  11   2   88.69    4.40
   1  11   2   84.69    4.40
  -1  11  -2   88.49    4.50
  -1  11  -2   78.19    4.30
  -1  11  -2   81.59    4.40
   1 -11  -2   83.69    4.20
   1 -11  -2   86.29    4.40
   1  11   2   85.59    4.50
   1  11   2   77.89    4.70
   1  11   2   86.19    4.40
  -1  11  -2   73.99    4.60
  -1  11  -2   83.29    4.40
   1  11   2   68.89    4.40
  -2 -11  -2   43.60    2.90
  -2  11   2   55.49    2.80
   2 -11   2   49.80    2.80
  -2  11   2   44.90    3.00
  -2  11   2   49.40    2.80
  -2  11   2   46.40    2.70
  -2  11   2   44.60    2.70
  -2 -11  -2   45.80    2.70
  -2  11   2   41.50    2.80
  -2  11  -2   41.90    2.70
  -2  11  -2   46.00    2.80
   2 -11  -2   53.89    2.80
  -2  11  -2   51.39    2.80
   2  11   2   51.09    2.70
   2  11   2   47.60    2.80
   2 -11  -2   52.59    2.60
  -2  11  -2   51.29    2.80
   2  11   2   48.00    2.90
   2  11   2   49.99    2.70
  -3  11   2   36.10    2.10
   3 -11   2   34.80    2.10
   3 -11   2   28.50    2.00
  -3  11   2   32.60    2.10
  -3  11   2   39.70    2.10
  -3  11   2   36.20    2.00
   3 -11   2   33.70    1.90
   3 -11  -2   28.30    2.10
   3  11   2   36.80    2.20
   3  11   2   34.10    2.00
  -3  11  -2   35.00    2.30
  -3  11  -2   37.70    2.20
  -3  11  -2   37.80    2.20
   3 -11  -2   41.40    2.00
  -3  11  -2   35.50    2.00
  -3  11  -2   34.60    2.10
   3  11   2   37.20    2.00
  -4  11   2    7.20    0.70
   4 -11   2    7.50    0.70
   4 -11   2    8.20    0.60
  -4  11   2    7.70    0.70
   4  11   2    7.80    0.80
   4  11   2    6.40    0.70
   4 -11  -2    7.80    0.60
  -4  11  -2    7.20    0.70
  -4  11  -2    8.40    0.70
   4 -11  -2    8.30    0.70
  -4  11  -2    8.60    0.80
   4  11   2    7.70    0.70
   0   0  -3    0.20    0.30
   0   0   3    0.10    0.40
   0   0   3    0.20    0.40
   0   0   3    0.10    0.10
   0   0  -3    0.60    0.20
   0   0  -3    0.00    0.40
   0   0  -3    0.20    0.40
   0   0   3    0.40    0.60
  -1   0   3  699.63   37.40
   1   0   3  766.12   37.30
  -1   0  -3  809.02   36.50
  -1   0   3  667.43   37.00
  -1   0  -3  689.23   37.70
  -1   0  -3  798.32   36.90
   1   0   3  770.02   37.60
  -1   0  -3  745.43   36.40
   1   0  -3  749.53   36.00
  -1   0   3  683.73   37.30
   1   0  -3  801.72   37.40
   1   0  -3  777.02   37.30
   1   0  -3  757.82   36.50
  -1   0   3  772.02   36.50
   1   0   3  816.52   37.00
   2   0  -3  127.49    8.30
   2   0   3  137.19    8.50
  -2   0  -3  154.28    9.00
   2   0  -3  144.09    7.80
  -2   0  -3  135.79    7.90
   2   0   3  136.89    7.90
   2   0   3  145.59    8.30
  -2   0   3  144.09    8.60
   2   0  -3  143.89    8.10
  -2   0   3  123.79    7.80
  -2   0   3  140.69    7.80
  -2   0  -3  151.78    7.80
   3   0  -3  702.23   36.40
   3   0  -3  637.84   36.40
   3   0  -3  791.82   38.00
   3   0  -3  775.32   38.50
   3   0   3  834.92   38.70
   3   0   3  634.94   37.80
  -3   0  -3  833.32   38.90
   3   0   3  802.52   37.80
  -3   0   3  718.73   36.40
  -3   0  -3  820.42   37.80
  -3   0  -3  691.43   37.60
  -3   0   3  759.02   38.50
  -3   0   3  839.92   37.90
   4   0   3   59.49    4.90
  -4   0   3   57.99    5.10
   4   0  -3   58.09    4.60
  -4   0  -3   53.79    4.40
  -4   0   3   59.09    4.70
  -4   0  -3   51.89    3.20
   4   0  -3   57.89    5.20
   4   0   3   45.30    4.40
   4   0   3   55.59    5.00
  -4   0  -3   59.39    4.70
  -4   0  -3   56.49    4.90
  -4   0   3   55.09    3.20
  -5   0  -3  224.48   13.90
  -5   0   3  244.58   14.10
   5   0  -3  233.88   14.70
   5   0  -3  261.17   14.10
  -5   0   3  242.98   11.80
  -5   0  -3  238.18   13.70
  -5   0   3  222.68   14.50
   5   0   3  240.18   14.30
   5   0   3  219.08   13.70
   5   0   3  228.88   14.40
   5   0  -3  227.38   11.90
  -5   0  -3  213.78   11.40
  -5   0  -3  221.38   11.70
  -5   0   3  226.88   11.50
   6   0   3    0.10    1.70
  -6   0  -3    0.50    0.70
  -6   0   3    0.90    1.30
  -6   0   3    0.00    0.50
  -6   0  -3    0.40    1.50
   6   0  -3   -0.40    1.40
  -6   0   3    0.40    0.60
  -6   0   3   -0.60    1.60
   6   0   3   -0.40    0.90
   6   0  -3    0.60    2.00
   6   0  -3    0.50    0.70
  -6   0  -3   -0.10    0.50
  -6   0  -3    3.00    1.40
  -7   0  -3  195.78   13.10
   7   0  -3  214.98   10.60
   7   0  -3  210.78   10.60
   7   0   3  201.18   10.50
   7   0  -3  204.78   10.70
  -7   0   3  220.18   10.90
   7   0  -3  198.18   10.50
   7   0   3  201.48   13.80
  -7   0  -3  188.58   10.30
   7   0   3  214.38   10.70
  -7   0   3  208.88   10.30
   7   0   3  204.98   10.60
   7   0  -3  189.48   13.50
   7   0  -3  194.28   10.60
   7   0  -3  203.28   10.50
  -7   0  -3  209.68   10.50
  -7   0  -3  203.68   10.40
   7   0   3  207.78   10.60
  -7   0   3  214.88   10.50
   7   0  -3  206.68   10.70
  -7   0  -3  218.38   10.20
   7   0  -3  209.18   11.10
  -8   0   3    3.90    0.80
   8   0  -3    1.90    0.90
   8   0   3    2.80    0.90
  -8   0   3    2.10    1.10
   8   0  -3    3.60    1.00
   8   0   3    3.30    0.90
   8   0  -3    3.30    0.80
   8   0  -3    3.40    1.00
   8   0   3    2.80    0.80
  -8   0  -3    3.00    0.70
   8   0   3    5.80    1.10
  -8   0   3    3.20    0.80
  -8   0   3    2.90    1.10
   8   0  -3    2.60    0.80
  -8   0  -3    2.90    0.70
  -9   0   3    1.40    0.90
  -9   0   3    2.10    0.70
  -9   0  -3    1.00    0.70
  -9   0  -3    1.20    0.50
  -9   0   3    1.70    0.60
  -9   0  -3    1.40    0.70
   9   0   3    0.60    0.80
   9   0  -3    1.80    0.70
   9   0  -3    2.60    0.90
   9   0  -3    0.60    0.60
   9   0   3    0.80    0.60
   9   0  -3    1.30    0.80
   9   0   3    2.40    0.70
  10   0  -3   48.00    2.90
 -10   0   3   53.79    3.20
 -10   0   3   51.19    2.60
  10   0  -3   43.30    3.10
  10   0  -3   45.60    2.90
 -10   0  -3   51.29    2.90
  10   0   3   44.30    2.80
 -10   0  -3   48.70    3.00
  10   0   3   51.19    3.10
  11   0  -3    7.70    0.80
 -11   0  -3    6.20    0.70
 -11   0   3    6.00    0.80
  11   0   3    6.60    0.80
 -11   0  -3    7.60    0.90
   0  -1  -3  795.12   42.50
   0  -1  -3  908.81   41.60
   0   1  -3  849.22   42.50
   0   1   3  749.13   42.10
   0   1  -3  904.71   41.30
   0   1   3  795.32   41.40
   0  -1   3  913.21   42.00
   0  -1  -3  810.82   41.50
   0   1  -3  814.72   42.00
   0   1   3  985.10   41.60
   0  -1   3  794.22   42.10
   0  -1  -3  926.21   41.50
   1   1  -3  134.39    8.30
  -1  -1  -3  137.19    7.90
   1  -1   3  133.49    8.20
  -1   1   3  153.08    7.90
   1  -1   3  159.68    8.50
   1  -1   3  149.29    7.40
   1  -1   3  152.78    8.30
   1   1  -3  136.89    7.20
  -1  -1  -3  127.89    8.70
   1   1  -3  159.58    8.50
  -1   1   3  159.18    8.10
  -1   1   3  143.49    8.40
   1  -1  -3  144.99    7.50
   1   1   3  130.09    8.40
   1   1   3  160.28    8.40
   1   1   3  157.98    7.90
   1  -1  -3  147.89    8.20
  -1  -1   3  131.99    8.50
   1   1   3  144.59    7.50
  -1   1  -3  148.59    7.30
  -1  -1   3  127.09    7.30
  -1  -1   3  141.89    7.40
  -1   1  -3  133.49    8.70
   1  -1  -3  156.58    8.70
  -1   1  -3  157.78    8.00
   1   1   3  134.69    7.50
  -2   1   3   78.29    5.40
   2  -1   3   82.99    5.40
   2  -1   3   86.29    5.50
  -2   1   3   78.49    4.30
  -2  -1  -3   77.59    5.10
  -2   1   3   83.99    5.10
   2   1  -3   79.59    5.30
  -2  -1  -3   83.69    6.00
   2   1  -3   76.99    5.50
   2   1  -3   84.29    5.00
  -2  -1  -3   81.89    5.20
   2  -1   3   78.89    5.30
   2   1   3   78.49    5.70
   2   1   3   87.69    4.60
  -2   1  -3   77.39    5.10
   2   1   3   72.19    4.50
  -2   1  -3   87.09    6.00
  -2   1  -3   83.19    4.80
  -2  -1   3   68.29    4.70
  -2  -1   3   81.59    5.70
   2  -1  -3   82.09    5.30
   2   1   3   78.59    5.40
  -3   1   3   48.60    4.10
   3  -1   3   51.79    4.10
  -3  -1  -3   48.40    3.80
   3   1  -3   56.49    4.30
  -3  -1  -3   41.50    3.60
   3   1  -3   52.79    4.30
  -3   1   3   40.30    2.80
   3  -1   3   46.60    4.00
  -3  -1  -3   49.60    4.30
  -3  -1  -3   45.40    2.70
  -3   1   3   43.90    2.70
   3  -1   3   48.00    3.90
  -3   1   3   45.30    3.70
  -3  -1   3   55.59    3.90
  -3   1  -3   47.60    3.60
  -3   1  -3   52.89    4.60
   3  -1  -3   54.39    4.50
  -3  -1   3   53.59    4.60
   3   1   3   47.70    3.40
   3  -1  -3   50.69    3.50
   3   1   3   46.90    4.40
   3  -1  -3   46.50    3.60
   3  -1  -3   38.20    3.30
  -3   1  -3   43.00    3.70
  -4   1   3   77.99    6.20
  -4   1   3   82.59    6.10
   4   1  -3   90.19    6.70
  -4  -1  -3   86.59    6.50
  -4   1   3   74.49    4.50
  -4  -1  -3   82.69    5.80
   4   1  -3   89.99    6.30
  -4  -1  -3   83.09    4.50
   4  -1   3   83.79    6.30
   4  -1   3   89.19    6.10
  -4  -1  -3   85.49    6.10
   4  -1   3   80.99    6.10
  -4   1  -3   78.19    5.70
   4  -1  -3   83.59    5.80
  -4  -1   3   79.99    5.90
   4   1   3   79.79    6.20
  -4  -1   3   68.39    6.40
   4   1   3   79.59    6.60
  -4  -1   3   81.19    4.40
  -4   1  -3   80.39    5.90
   4   1   3   78.49    5.50
  -4   1  -3   81.89    6.50
   4  -1  -3   87.69    6.80
   5   1  -3   10.30    2.30
   5  -1   3    8.90    2.30
   5  -1   3    8.50    1.30
  -5  -1  -3   10.30    1.00
  -5  -1  -3   12.60    2.40
  -5   1   3    9.00    1.20
   5  -1   3   11.90    2.50
   5   1  -3    9.00    1.30
  -5   1   3   10.90    2.40
  -5  -1  -3   10.70    1.20
  -5  -1  -3   12.10    2.70
  -5   1   3    9.00    1.00
   5   1  -3    8.70    2.50
   5  -1   3    9.60    2.30
  -5   1   3   10.00    2.40
  -5  -1   3    9.20    1.00
  -5  -1   3    8.80    2.50
  -5   1  -3    9.60    2.10
   5  -1  -3   11.20    2.20
   5  -1  -3   10.60    1.30
  -5   1  -3    8.90    2.20
  -5  -1   3   14.00    1.30
  -5  -1   3    7.10    2.10
   5   1   3   10.00    2.60
   5   1   3   14.00    2.80
   5  -1  -3   13.60    3.00
  -6   1   3   27.40    2.20
   6   1  -3   17.70    3.90
   6   1  -3   24.00    3.50
   6   1  -3   26.70    2.20
   6  -1   3   22.10    4.10
  -6  -1  -3   26.50    2.10
   6  -1   3   23.70    2.00
  -6   1   3   23.70    3.60
  -6  -1  -3   25.10    1.80
  -6   1   3   24.60    1.70
  -6  -1  -3   20.80    3.60
  -6  -1  -3   24.70    3.60
  -6   1  -3   22.50    3.90
   6   1   3   22.00    3.80
   6  -1  -3   24.20    5.30
   6   1   3   26.20    3.80
  -6  -1   3   26.20    2.10
   6   1   3   25.70    1.90
  -6   1  -3   23.10    3.50
  -6  -1   3   24.80    1.70
  -6  -1   3   25.40    3.70
  -6  -1   3   20.50    3.80
   6  -1  -3   22.90    3.50
   6  -1  -3   24.40    2.20
  -7   1   3   33.00    2.10
  -7  -1  -3   32.60    2.50
   7  -1   3   32.20    2.40
   7  -1   3   32.10    2.50
   7  -1   3   27.90    4.60
   7   1  -3   32.70    2.60
  -7   1   3   33.40    2.20
  -7  -1  -3   36.40    2.30
   7  -1   3   32.30    2.40
  -7  -1  -3   33.80    2.10
   7   1  -3   33.70    2.50
   7   1  -3   28.40    4.90
   7   1  -3   32.80    2.30
  -7  -1  -3   32.80    4.50
   7   1  -3   34.20    2.50
   7   1  -3   32.70    2.40
   7   1  -3   32.50    2.40
  -7  -1  -3   32.30    2.10
   7  -1   3   30.90    2.50
   7   1  -3   33.40    2.40
  -7   1   3   35.60    2.80
  -7   1   3   34.40    2.70
   7  -1  -3   34.90    2.40
   7  -1  -3   36.30    2.60
   7   1   3   34.10    4.80
   7   1   3   36.30    2.50
   7   1   3   31.70    2.40
  -7   1  -3   32.90    2.30
   7  -1  -3   34.80    2.50
   7  -1  -3   34.30    2.80
  -7   1  -3   30.70    4.10
  -7  -1   3   34.90    2.30
  -7  -1   3   36.50    2.60
  -7   1  -3   32.00    2.20
  -7  -1   3   31.30    2.10
   7   1   3   32.60    2.40
  -7   1  -3   31.50    2.00
   7   1   3   35.10    2.30
   7  -1  -3   34.60    2.40
  -8   1   3   80.79    4.90
   8   1  -3   84.99    4.80
  -8   1   3   79.49    4.50
   8   1  -3   82.89    4.90
   8   1  -3   83.49    4.80
   8   1  -3   83.99    5.20
   8  -1   3   82.49    4.80
   8  -1   3   82.59    4.70
  -8  -1  -3   82.59    4.60
   8   1  -3   77.79    4.80
   8   1  -3   79.69    4.80
  -8  -1  -3   87.59    4.40
  -8  -1  -3   80.09    4.50
  -8   1   3   82.79    4.30
   8   1  -3   77.79    4.70
  -8  -1   3   82.19    4.40
   8  -1  -3   73.59    4.70
  -8   1  -3   78.59    4.80
  -8  -1   3   74.39    5.00
   8   1   3   80.69    4.80
   8   1   3   82.89    4.80
   8  -1  -3   83.39    4.80
   8   1   3   91.79    4.90
   8  -1  -3   83.79    4.80
   8  -1  -3   78.49    4.60
  -8  -1   3   66.99    4.50
   8  -1  -3   85.69    5.20
  -8   1  -3   81.29    4.60
  -9  -1  -3  101.59    5.10
   9   1  -3   94.69    5.40
  -9  -1  -3  102.19    5.40
   9   1  -3  106.39    5.60
   9   1  -3  103.79    5.60
   9   1  -3   99.39    5.60
   9   1  -3   93.99    5.80
  -9   1   3   98.19    5.70
   9   1  -3  104.09    5.60
   9  -1   3  106.19    5.60
   9  -1   3  101.49    5.60
  -9   1   3  100.39    5.10
   9   1   3   90.19    5.50
  -9   1  -3   93.59    5.40
   9  -1  -3  101.49    5.50
   9  -1  -3  100.29    5.40
   9  -1  -3  101.89    6.00
  -9  -1   3   98.19    5.10
  -9  -1   3   87.89    5.80
   9  -1  -3   94.89    5.50
  -9  -1   3  100.69    5.70
  -9   1  -3   95.89    5.50
   9   1   3   95.99    5.50
   9   1   3   99.39    5.50
  -9  -1   3   97.99    5.40
  10   1  -3   64.89    3.70
 -10   1   3   61.99    3.70
 -10  -1  -3   64.89    3.60
  10  -1   3   67.79    3.70
  10  -1   3   62.09    3.60
 -10   1   3   63.89    3.80
 -10  -1  -3   64.99    3.70
  10   1  -3   64.19    3.60
  10   1  -3   66.59    3.70
  10  -1  -3   64.09    3.70
  10   1   3   56.59    3.60
  10  -1  -3   59.69    3.50
 -10  -1   3   68.09    3.40
  10  -1  -3   64.79    4.00
 -10  -1   3   70.19    3.90
 -10   1  -3   68.99    3.70
 -10   1  -3   62.99    3.70
  10   1   3   65.59    3.70
 -10  -1   3   58.39    3.50
 -11   1   3   43.40    2.80
 -11  -1  -3   48.30    2.70
 -11  -1  -3   53.89    2.70
  11  -1   3   50.79    2.70
  11   1  -3   50.79    2.70
 -11  -1   3   48.20    2.70
 -11  -1   3   53.59    2.80
  11  -1  -3   43.50    2.70
  11   1   3   55.99    2.80
   0  -2   3  514.55   27.70
   0  -2  -3  523.25   29.60
   0   2  -3  576.14   29.10
   0  -2   3  645.34   29.10
   0  -2  -3  595.24   28.10
   0   2   3  620.54   28.50
   0  -2   3  560.04   28.80
   0   2   3  523.45   28.90
   0   2  -3  602.74   29.70
   0   2   3  569.14   28.70
   0  -2  -3  617.84   28.60
   0   2  -3  597.64   27.80
   0   2   3  521.85   28.00
   0   2  -3  567.94   28.30
   1   2  -3  394.76   22.60
  -1   2   3  521.25   23.60
   1  -2   3  400.06   22.60
   1  -2   3  495.95   23.60
   1  -2   3  519.95   23.70
  -1  -2  -3  449.56   23.40
  -1  -2  -3  439.06   24.50
  -1   2   3  468.85   23.10
   1   2  -3  454.85   24.00
   1   2  -3  464.65   23.90
   1  -2   3  440.06   23.90
   1   2  -3  396.76   23.40
  -1   2   3  471.85   23.70
  -1   2   3  458.65   22.90
  -1  -2   3  481.75   22.80
   1  -2  -3  489.45   24.50
   1  -2  -3  435.26   23.30
  -1  -2   3  413.26   22.70
   1   2   3  487.45   23.60
  -1  -2   3  527.15   24.20
   1   2   3  479.85   23.50
  -1   2  -3  476.25   22.70
   1   2   3  502.35   24.20
  -1   2  -3  395.36   24.20
  -1   2  -3  495.55   23.30
   2   2  -3  321.97   17.10
  -2   2   3  357.36   17.40
  -2   2   3  336.77   16.50
   2  -2   3  330.17   17.10
   2   2  -3  277.27   17.10
  -2  -2  -3  330.37   18.20
   2  -2   3  334.67   17.70
  -2  -2  -3  282.67   16.90
  -2   2   3  372.06   17.40
  -2  -2  -3  334.57   17.30
  -2   2   3  279.37   16.30
   2  -2   3  327.27   16.90
   2   2  -3  328.57   17.60
   2  -2  -3  320.27   17.70
  -2  -2   3  300.17   16.00
  -2   2  -3  341.17   18.40
  -2   2  -3  293.47   16.80
   2   2   3  337.97   18.00
   2  -2  -3  356.66   17.60
  -2   2  -3  334.57   16.60
  -2  -2   3  341.37   16.80
   2   2   3  293.07   17.10
  -2  -2   3  325.37   17.80
  -3  -2  -3  617.64   30.90
  -3   2   3  609.74   29.70
   3  -2   3  533.45   29.30
  -3  -2  -3  569.94   28.10
  -3  -2  -3  531.95   29.60
   3  -2   3  553.04   29.50
  -3  -2  -3  589.14   30.00
  -3   2   3  592.84   30.00
   3   2  -3  619.14   30.40
   3  -2   3  492.85   29.90
   3  -2   3  572.04   28.20
  -3   2   3  586.14   28.80
   3   2  -3  521.25   29.80
  -3   2   3  588.54   29.10
  -3  -2   3  598.04   29.60
   3  -2  -3  614.54   30.00
  -3   2  -3  618.64   29.50
  -3   2  -3  570.24   29.60
  -3   2  -3  634.74   31.20
   3   2   3  523.05   28.00
   3   2   3  640.74   31.10
   3   2   3  587.34   30.00
  -3  -2   3  552.94   28.60
   3  -2  -3  638.94   30.60
  -3  -2   3  588.24   30.80
  -4  -2  -3   10.30    2.10
   4  -2   3    9.50    2.00
  -4   2   3   10.00    2.10
   4   2  -3    9.90    2.30
   4  -2   3    9.90    2.30
   4  -2   3    6.80    1.60
   4  -2   3    9.10    1.10
   4   2  -3   10.10    2.30
  -4  -2  -3   10.30    1.10
  -4  -2  -3    8.80    2.20
  -4   2   3    8.10    1.10
  -4   2   3   11.30    2.00
  -4  -2  -3   10.70    2.30
   4  -2  -3    9.10    1.50
  -4  -2   3   10.30    2.40
  -4  -2   3    9.10    2.00
  -4  -2   3    9.20    0.90
   4  -2  -3    8.70    2.30
  -4   2  -3    7.50    1.80
   4   2   3   10.10    2.70
   4   2   3   10.30    2.20
  -4   2  -3    8.60    2.30
  -4   2  -3    8.90    1.80
   5  -2   3  159.48    8.90
  -5   2   3  174.78   11.30
  -5   2   3  159.88    8.40
  -5  -2  -3  162.48    8.40
   5   2  -3  164.28    8.90
  -5   2   3  168.48    8.80
  -5  -2  -3  175.98   10.70
   5  -2   3  155.98    8.40
  -5  -2  -3  178.88    8.80
   5   2  -3  178.18   11.40
   5   2  -3  182.88   11.80
   5  -2   3  171.98   10.70
   5  -2   3  141.29   11.20
  -5  -2  -3  170.98   11.20
   5  -2  -3  169.68    9.00
   5   2   3  183.58   11.60
  -5  -2   3  168.48   11.00
  -5  -2   3  171.38    8.60
   5   2   3  176.08   12.20
   5  -2  -3  177.58   12.10
  -5   2  -3  180.48   10.80
  -5   2  -3  156.78   11.40
  -5   2  -3  142.99   10.40
  -5  -2   3  168.38   12.00
   6   2  -3   67.99    4.20
   6  -2   3   72.29    4.50
   6   2  -3   77.29    4.40
   6   2  -3   71.19    6.60
   6  -2   3   65.19    4.10
   6   2  -3   66.19    4.20
   6   2  -3   70.59    4.20
  -6   2   3   70.19    4.20
   6  -2   3   70.69    6.30
   6   2  -3   70.79    4.20
  -6  -2  -3   67.69    3.80
   6   2  -3   66.79    4.00
  -6  -2  -3   78.49    6.40
   6   2  -3   72.89    4.20
   6  -2   3   65.99    7.10
   6   2  -3   61.09    6.70
  -6  -2  -3   76.59    4.30
   6  -2   3   69.59    4.10
  -6  -2  -3   73.89    4.00
  -6   2   3   73.29    4.00
  -6   2   3   72.09    3.80
   6  -2  -3   69.89    4.20
   6   2   3   62.09    4.30
   6  -2  -3   71.99    4.10
  -6  -2   3   76.89    4.20
  -6  -2   3   70.59    3.90
   6  -2  -3   70.29    4.10
  -6   2  -3   73.19    4.00
   6   2   3   71.59    4.00
  -6   2  -3   76.89    6.30
   6   2   3   66.99    4.10
   6   2   3   72.69    4.20
   6   2   3   79.99    7.20
  -6  -2   3   67.29    6.40
   6  -2  -3   76.09    4.50
  -6   2  -3   60.29    6.30
  -7   2   3   47.90    3.40
   7   2  -3   51.19    3.10
   7  -2   3   46.60    3.30
   7  -2   3   48.50    3.10
  -7  -2  -3   39.70    5.20
   7   2  -3   37.90    5.60
   7   2  -3   51.19    3.20
  -7   2   3   49.70    2.70
  -7  -2  -3   51.89    3.40
  -7  -2  -3   47.10    2.80
   7   2  -3   53.29    3.30
   7  -2   3   51.69    3.20
  -7  -2  -3   50.89    3.00
   7   2  -3   50.69    3.20
   7   2  -3   51.59    3.30
   7   2  -3   48.70    3.20
  -7  -2  -3   42.50    2.80
   7   2  -3   54.69    3.50
   7   2   3   45.40    3.20
   7   2   3   48.80    5.90
  -7  -2   3   46.50    2.90
   7  -2  -3   48.50    3.10
   7   2   3   43.40    3.20
   7  -2  -3   45.60    3.50
  -7   2  -3   47.80    3.00
  -7  -2   3   40.60    3.10
  -7   2  -3   44.70    3.20
   7  -2  -3   53.79    3.20
   7   2   3   45.60    3.00
   7   2   3   46.60    3.10
  -7   2  -3   44.00    2.90
  -7   2  -3   48.00    5.50
   7  -2  -3   46.00    3.10
   7   2   3   46.70    3.10
   7   2   3   45.60    2.90
  -8  -2  -3   10.40    1.20
   8   2  -3   10.40    1.30
  -8  -2  -3   10.60    1.20
  -8   2   3   11.10    1.10
   8  -2   3   11.40    1.40
   8  -2   3   10.70    1.40
   8  -2   3   11.00    1.50
  -8   2   3   10.40    1.40
  -8  -2  -3   10.00    1.60
   8   2  -3   10.00    1.50
   8   2  -3   10.20    1.40
   8   2  -3   10.10    1.50
  -8  -2  -3   11.30    1.30
   8   2  -3   11.80    1.70
   8   2  -3   11.10    1.50
   8   2  -3   10.60    1.50
   8  -2  -3   11.90    1.40
   8   2   3    8.90    1.30
   8   2   3   12.30    1.40
   8  -2  -3   11.40    1.50
   8   2   3   12.00    1.40
  -8  -2   3   10.30    1.20
  -8   2  -3   10.40    1.20
   8  -2  -3   11.10    1.80
  -8  -2   3    9.40    1.30
  -8  -2   3   11.80    1.50
  -8   2  -3    9.80    1.30
   8   2   3    9.40    1.30
   9  -2   3   23.20    2.20
  -9  -2  -3   24.00    1.90
   9  -2   3   22.90    1.90
   9   2  -3   24.30    2.10
   9   2  -3   23.20    1.90
  -9  -2  -3   22.50    1.70
  -9   2   3   24.00    2.20
   9   2  -3   23.00    2.30
   9   2  -3   23.80    2.00
   9   2  -3   24.20    2.00
  -9   2   3   25.30    2.00
  -9  -2  -3   24.00    1.90
   9   2  -3   25.50    2.20
   9  -2   3   24.10    2.10
  -9  -2   3   21.30    2.30
   9   2   3   26.30    2.00
   9  -2  -3   23.70    1.80
   9   2   3   23.10    2.10
  -9   2  -3   24.20    1.90
   9   2   3   24.90    2.00
   9  -2  -3   22.80    1.90
  -9   2  -3   23.30    1.80
  -9  -2   3   25.10    1.80
   9  -2  -3   22.30    2.30
  -9  -2   3   22.10    1.90
  10   2  -3   64.69    4.00
 -10  -2  -3   71.19    3.80
  10   2  -3   74.89    4.20
  10  -2   3   79.19    4.10
  10  -2   3   70.39    4.10
 -10   2   3   77.29    4.30
 -10  -2  -3   79.79    4.10
  10   2  -3   76.19    4.10
  10   2  -3   75.79    4.20
  10   2  -3   70.89    4.10
 -10   2   3   69.49    4.10
  10   2   3   74.79    4.10
  10   2   3   75.29    4.20
  10  -2  -3   70.89    4.40
 -10   2  -3   68.59    4.00
 -10   2  -3   76.99    4.10
 -10  -2   3   78.69    4.30
 -10  -2   3   81.29    3.90
  10  -2  -3   76.89    4.20
   0   3   3    5.00    1.20
   0  -3   3    5.40    1.30
   0  -3  -3    5.30    0.80
   0  -3  -3    5.40    1.80
   0   3   3    4.20    0.90
   0   3  -3    5.70    1.10
   0   3  -3    4.30    1.60
   0  -3  -3    4.80    0.70
   0  -3   3    5.50    1.40
   0   3  -3    4.40    0.80
   0  -3   3    4.10    1.10
   0   3   3    5.90    1.40
   0   3   3    6.50    1.50
   1  -3   3   72.89    4.70
   1   3  -3   67.79    4.50
   1   3  -3   61.99    5.20
  -1   3   3   77.29    4.90
  -1   3   3   60.39    4.00
  -1  -3  -3   65.89    3.80
  -1   3   3   76.99    5.20
   1  -3   3   71.69    4.80
  -1   3   3   80.59    5.00
  -1  -3  -3   68.69    5.00
   1  -3   3   68.89    5.40
   1   3  -3   77.29    5.80
  -1  -3  -3   76.79    6.20
   1   3   3   73.69    4.80
  -1   3  -3   66.59    4.80
  -1  -3   3   73.59    4.50
  -1   3  -3   71.09    4.50
   1  -3  -3   73.19    4.80
  -1  -3   3   71.09    5.30
   1  -3  -3   70.99    6.10
   1   3   3   75.29    5.30
  -1   3  -3   83.89    6.30
   1  -3  -3   70.79    3.90
   1   3   3   72.09    5.50
  -2   3   3  156.38    9.80
  -2  -3  -3  198.98   12.00
  -2  -3  -3  172.98    8.90
   2   3  -3  176.98    9.70
   2  -3   3  187.18   11.20
   2   3  -3  186.88   10.90
   2  -3   3  162.98    9.60
   2  -3   3  170.08    8.90
   2  -3   3  174.88   10.10
  -2  -3  -3  155.38   10.30
  -2   3   3  189.38   10.80
   2   3  -3  180.58   10.60
   2   3  -3  157.98   10.60
  -2   3   3  178.28   10.10
  -2   3  -3  205.18   12.20
   2  -3  -3  187.88   11.70
   2  -3  -3  167.88    9.00
   2   3   3  198.68   11.50
   2   3   3  180.18   10.40
   2  -3  -3  189.68   10.70
  -2   3  -3  166.18   10.30
  -2  -3   3  196.08   11.40
  -2   3  -3  183.08   10.00
  -2  -3   3  192.68   10.20
   3  -3   3   58.79    3.30
  -3   3   3   54.69    4.10
  -3   3   3   58.19    5.00
  -3  -3  -3   58.29    5.50
   3   3  -3   58.49    5.10
  -3  -3  -3   52.99    3.20
  -3   3   3   54.59    4.10
   3   3  -3   58.89    5.00
  -3  -3  -3   59.49    5.00
   3  -3   3   55.19    4.30
  -3  -3  -3   57.19    4.70
   3  -3   3   59.59    5.40
   3  -3  -3   65.59    5.30
  -3   3  -3   58.59    4.50
   3  -3  -3   52.79    3.30
  -3  -3   3   54.19    4.40
  -3   3  -3   61.49    5.80
   3   3   3   60.69    5.60
   3   3   3   49.00    4.70
  -3   3  -3   54.29    4.50
  -3  -3   3   55.29    5.40
   3  -3  -3   57.99    5.30
  -4  -3  -3    4.60    0.80
  -4  -3  -3    2.90    1.60
   4  -3   3    4.50    0.80
  -4  -3  -3    3.50    1.40
   4  -3   3    3.30    1.20
   4  -3   3    3.30    0.60
  -4   3   3    2.20    1.00
   4   3  -3    4.00    1.60
  -4   3   3    3.90    1.80
   4  -3   3    3.20    1.50
  -4  -3  -3    5.10    1.70
   4   3  -3    3.70    1.70
  -4  -3  -3    3.90    0.70
   4  -3  -3    4.50    0.90
   4   3   3    5.40    2.20
  -4  -3   3    3.30    1.40
  -4   3  -3    3.10    1.60
  -4   3  -3    3.80    1.50
  -4   3  -3    4.70    1.10
   4   3   3    4.60    1.80
  -4   3  -3    3.40    1.40
   4  -3  -3    3.40    1.50
   4  -3  -3    4.00    1.90
  -4  -3   3    5.40    2.00
  -5  -3  -3   85.29    4.50
   5  -3   3   78.59    7.20
  -5  -3  -3   78.69    6.90
  -5  -3  -3   82.39    4.20
  -5   3   3   74.09    6.70
  -5  -3  -3   61.29    6.00
   5   3  -3   78.09    4.50
   5  -3   3   82.19    4.70
   5   3  -3   86.09    7.10
   5  -3   3   79.09    4.50
   5   3  -3   72.89    6.80
   5  -3   3   78.79    4.20
  -5  -3   3   69.79    7.40
  -5   3  -3   82.19    6.40
   5   3   3   93.79    7.40
  -5  -3   3   69.99    6.40
  -5  -3   3   81.89    4.30
   5  -3  -3   76.29    4.60
  -5   3  -3   63.69    7.00
  -5   3  -3   76.09    6.30
   5   3   3   65.29    7.40
   5  -3  -3   72.29    7.30
  -6  -3  -3   19.00    1.80
   6   3  -3   17.10    1.90
   6  -3   3   18.20    1.70
   6   3  -3   16.40    1.60
   6   3  -3   17.50    1.60
   6  -3   3   18.10    1.90
  -6   3   3   18.10    1.90
   6   3  -3   17.00    1.70
  -6  -3  -3   18.50    1.40
   6  -3   3   18.60    1.70
   6   3  -3   19.10    1.70
  -6  -3  -3   18.90    3.40
  -6  -3  -3   19.10    1.50
  -6   3   3   17.20    1.80
   6   3  -3   17.50    1.60
   6   3  -3   17.90    1.80
  -6   3   3   15.60    1.20
   6   3  -3   19.80    3.90
   6   3   3   18.90    1.50
  -6   3  -3   17.90    1.60
  -6   3  -3   17.70    1.50
   6   3   3   19.30    1.80
   6   3   3   18.60    3.80
   6  -3  -3   17.50    1.60
  -6   3  -3   14.70    3.20
   6   3   3   16.70    1.70
   6   3   3   17.00    1.50
  -6  -3   3   16.60    1.40
   6   3   3   18.70    1.90
  -6   3  -3   19.10    2.10
   6  -3  -3   19.60    2.00
  -6  -3   3   17.90    1.60
   6  -3  -3   18.30    1.60
   6   3   3   18.90    1.70
   6   3   3   17.80    1.60
  -7  -3  -3   19.10    1.70
  -7  -3  -3   20.10    2.00
   7   3  -3   21.50    2.00
   7   3  -3   18.30    1.60
   7  -3   3   18.80    1.90
   7   3  -3   20.00    1.80
   7   3  -3   17.30    1.90
   7   3  -3   17.40    2.00
   7  -3   3   17.90    1.70
  -7   3   3   18.30    2.00
  -7  -3  -3   18.70    1.40
   7   3  -3   18.50    1.80
  -7   3   3   16.10    1.80
   7  -3   3   18.10    2.10
   7   3  -3   19.50    1.90
  -7  -3  -3   19.10    1.50
  -7  -3  -3   15.90    3.90
   7   3   3   17.00    1.70
   7   3   3   18.40    1.80
  -7  -3   3   17.60    1.50
   7   3   3   18.60    1.70
  -7   3  -3   17.50    1.80
  -7   3  -3   18.20    1.60
   7   3   3   18.70    1.50
   7  -3  -3   18.30    1.80
  -7  -3   3   18.20    1.80
   7   3   3   18.00    1.80
   7  -3  -3   17.60    2.00
  -7   3  -3   17.90    1.50
   7   3   3   16.80    1.80
   7  -3  -3   18.50    1.70
   8   3  -3   55.69    3.40
   8  -3   3   52.79    3.50
   8   3  -3   57.49    3.60
   8  -3   3   57.79    3.50
  -8   3   3   53.49    3.60
   8   3  -3   56.19    3.50
  -8   3   3   52.19    3.50
  -8  -3  -3   54.69    3.40
   8   3  -3   52.19    3.50
  -8  -3  -3   54.39    3.10
   8  -3   3   53.79    3.90
  -8  -3  -3   56.89    3.90
   8   3  -3   52.99    3.40
   8   3  -3   59.69    3.80
   8   3   3   52.99    3.50
   8   3   3   55.19    3.50
  -8   3  -3   51.69    3.50
   8  -3  -3   56.59    3.40
  -8  -3   3   53.79    3.70
  -8   3  -3   53.29    3.20
   8   3   3   55.29    3.50
  -8  -3   3   59.19    3.40
  -8   3  -3   54.29    3.30
   8  -3  -3   47.10    3.70
   8   3   3   59.39    3.40
   8   3   3   55.79    3.50
   8   3   3   52.19    3.60
   8  -3  -3   54.79    3.50
  -8  -3   3   51.79    3.10
   9   3  -3   65.49    4.00
  -9   3   3   67.39    4.10
   9   3  -3   76.49    4.20
  -9  -3  -3   62.79    3.70
  -9  -3  -3   69.29    3.90
   9   3  -3   72.19    4.10
   9  -3   3   70.09    4.10
   9  -3   3   72.29    4.10
   9  -3   3   62.59    4.30
   9   3  -3   67.19    4.20
   9   3  -3   60.79    4.10
  -9  -3  -3   69.39    3.90
   9   3  -3   71.59    4.10
  -9   3   3   58.19    4.00
   9  -3  -3   76.59    4.10
  -9  -3   3   66.99    4.30
   9   3   3   70.89    4.10
   9   3   3   75.49    4.20
   9  -3  -3   72.99    4.50
  -9   3  -3   59.49    3.90
   9   3   3   72.89    4.10
  -9  -3   3   74.89    4.00
  -9  -3   3   73.19    3.80
   9  -3  -3   72.59    4.00
   9   3   3   67.79    4.00
   9   3   3   62.99    3.90
  10   3  -3  122.49    6.60
 -10  -3  -3  141.19    6.70
  10   3  -3  131.89    6.80
 -10  -3  -3  131.69    6.40
 -10   3   3  128.49    6.80
  10   3  -3  130.49    6.80
  10   3  -3  136.49    6.80
  10  -3   3  126.09    6.70
  10  -3   3  125.79    6.60
  10   3   3  132.79    6.80
 -10  -3   3  134.49    6.50
 -10  -3   3  132.79    6.70
  10   3   3  133.99    6.80
  10  -3  -3  126.59    6.70
  10   3   3  119.69    6.70
  10  -3  -3  136.59    6.70
 -10   3  -3  135.79    6.60
  10  -3  -3  115.29    6.90
   0   4   3   46.10    3.90
   0   4   3   45.00    3.90
   0  -4   3   44.20    3.70
   0  -4  -3   37.20    2.40
   0   4   3   40.90    2.90
   0   4  -3   42.90    4.70
   0   4  -3   45.20    3.40
   0  -4   3   44.10    4.30
   0   4  -3   44.70    3.60
   0  -4   3   43.10    3.60
   0   4   3   44.00    4.10
   0  -4  -3   44.80    5.00
   1  -4   3  210.78   12.40
  -1   4   3  214.18   12.20
   1   4  -3  207.78   11.20
  -1   4   3  224.58   11.70
  -1  -4  -3  175.78   11.50
  -1  -4  -3  203.18   13.30
   1  -4   3  212.38   11.20
   1  -4   3  167.18   10.60
  -1   4   3  175.18   11.00
   1   4  -3  217.08   13.10
  -1  -4  -3  192.68    9.90
   1   4   3  196.28   12.10
  -1   4  -3  206.18   13.20
  -1  -4   3  187.78   11.50
  -1  -4   3  210.28   11.20
  -1   4  -3  201.78   11.60
   1  -4  -3  194.78   10.00
  -1   4  -3  185.28   11.00
  -1  -4   3  192.58   12.00
   1   4   3  184.58   11.00
   1   4   3  221.88   12.30
   1  -4  -3  203.98   11.30
   1  -4  -3  206.88   13.40
  -1  -4   3  207.08   11.90
   2   4  -3  165.88   11.50
   2  -4   3  180.88    9.10
  -2  -4  -3  197.68   11.30
  -2   4   3  187.38   11.40
   2  -4   3  185.88   11.80
   2   4  -3  182.38   11.10
  -2   4   3  192.38   10.70
   2   4  -3  181.88   11.30
  -2  -4  -3  175.78    9.10
   2  -4   3  148.59   10.00
   2   4  -3  187.58   10.40
   2  -4  -3  191.58   12.60
  -2  -4   3  170.38   10.60
   2   4   3  203.18   12.20
   2   4   3  172.58   10.70
   2  -4  -3  180.58    9.30
  -2   4  -3  190.28   12.70
  -2   4  -3  176.28   10.50
  -2  -4   3  192.38   11.70
   2   4   3  190.58   11.50
  -2   4  -3  184.38   10.90
  -3  -4  -3  252.77   14.80
   3  -4   3  225.28   11.80
   3   4  -3  246.18   14.50
  -3   4   3  240.28   13.50
  -3  -4  -3  231.28   11.90
   3  -4   3  245.38   12.10
  -3  -4  -3  229.48   15.30
   3  -4   3  250.17   15.10
   3   4  -3  264.07   14.60
  -3   4   3  257.17   14.70
  -3  -4  -3  239.78   14.20
  -3   4  -3  232.58   12.40
  -3   4  -3  214.28   12.10
   3  -4  -3  248.78   12.10
  -3   4  -3  247.48   14.10
   3   4   3  246.18   15.30
  -3  -4   3  214.78   13.60
   3  -4  -3  245.98   15.50
   3  -4  -3  234.88   14.50
  -3   4  -3  240.98   15.80
  -3   4  -3  223.38   13.60
   3   4   3  255.87   14.30
  -3  -4   3  245.98   15.10
   3  -4  -3  237.48   11.80
   4   4  -3   19.80    3.40
  -4  -4  -3   18.60    3.20
   4   4  -3   18.10    1.60
   4  -4   3   21.40    3.50
  -4  -4  -3   18.90    3.40
   4  -4   3   19.30    1.50
  -4  -4  -3   23.70    3.40
  -4  -4  -3   23.00    1.70
  -4  -4  -3   17.40    1.40
  -4   4   3   19.00    2.60
   4  -4   3   19.50    1.70
  -4   4   3   22.40    3.30
   4   4  -3   23.30    3.40
  -4   4  -3   22.10    3.20
   4  -4  -3   17.70    3.80
  -4   4  -3   18.80    3.60
   4  -4  -3   21.60    1.50
  -4  -4   3   22.20    4.00
  -4  -4   3   19.00    3.10
   4  -4  -3   18.90    1.70
   4  -4  -3   21.20    1.90
   4   4   3   21.40    3.70
   4   4   3   23.80    3.60
   4  -4  -3   22.20    3.80
  -4   4  -3   19.70    1.80
  -4   4  -3   20.00    2.00
  -4   4  -3   22.90    3.10
  -5  -4  -3   48.30    2.80
  -5   4   3   48.00    3.10
   5   4  -3   47.30    3.00
   5   4  -3   46.10    3.10
   5   4  -3   46.60    3.10
   5   4  -3   49.20    5.40
   5   4  -3   46.10    3.10
   5  -4   3   46.40    3.40
   5  -4   3   51.19    2.90
  -5  -4  -3   50.39    3.10
   5   4  -3   47.50    3.10
  -5  -4  -3   48.90    4.90
   5  -4   3   49.60    3.10
  -5   4  -3   43.60    2.80
   5   4   3   46.20    2.80
  -5   4  -3   50.29    2.90
   5   4   3   46.80    2.80
  -5  -4   3   48.40    2.70
  -5  -4   3   39.30    4.70
   5  -4  -3   43.70    2.60
   5   4   3   46.10    3.10
   5   4   3   48.50    3.00
   5  -4  -3   48.10    3.00
   5  -4  -3   48.80    3.30
   5   4   3   47.10    5.20
   5   4   3   46.50    3.10
  -5   4  -3   45.50    3.10
  -5   4  -3   40.20    4.70
  -5   4  -3   50.49    3.20
   5   4   3   47.30    3.20
  -5   4  -3   49.10    5.00
   6   4  -3   91.99    5.20
  -6  -4  -3   89.79    7.50
  -6  -4  -3   83.29    5.40
   6   4  -3   97.99    5.40
   6  -4   3   94.49    5.40
  -6  -4  -3   98.59    5.10
  -6   4   3   98.09    5.60
   6   4  -3   95.79    5.40
   6   4  -3   96.19    5.50
   6   4  -3   93.39    5.30
  -6   4   3   90.99    5.10
   6   4  -3   86.99    5.20
   6  -4   3   91.29    5.20
  -6   4   3   91.89    5.40
   6  -4   3  101.89    5.90
   6   4  -3   95.29    8.80
   6  -4   3   89.19    5.20
   6   4   3   87.89    5.00
   6  -4  -3   99.29    5.40
   6   4   3   89.79    5.50
   6   4   3   98.09    5.50
   6   4   3   95.39    8.60
   6  -4  -3  100.99    5.80
   6   4   3   86.99    5.20
   6   4   3   97.59    5.40
  -6   4  -3   94.19    5.10
  -6  -4   3  101.29    5.30
   6  -4  -3   95.29    5.30
  -6   4  -3   94.79    5.10
  -6   4  -3   97.29    7.90
   6   4   3   94.69    5.40
  -6   4  -3   91.99    5.40
   6   4   3  102.09    5.20
  -7  -4  -3  263.57   13.60
  -7   4   3  246.48   13.00
   7   4  -3  265.67   13.40
   7   4  -3  265.67   13.40
  -7  -4  -3  254.47   12.90
   7   4  -3  248.48   13.40
  -7   4   3  244.78   13.30
  -7   4   3  262.47   13.50
   7  -4   3  240.88   13.20
   7   4  -3  252.87   13.20
   7   4  -3  281.77   13.50
   7  -4   3  272.47   13.90
  -7  -4  -3  253.27   13.10
   7  -4   3  277.67   13.40
   7   4  -3  257.97   13.40
   7   4   3  265.57   13.20
  -7   4  -3  258.67   13.10
   7   4   3  252.67   13.20
   7  -4  -3  271.87   13.90
  -7   4  -3  265.07   13.50
   7   4   3  282.67   13.50
   7   4   3  267.67   13.40
   7  -4  -3  264.57   13.20
  -7   4  -3  268.97   13.20
  -7  -4   3  256.77   13.00
  -7  -4   3  263.97   13.40
   7   4   3  264.97   13.40
   7  -4  -3  266.77   13.40
   7   4   3  258.27   13.50
   8   4  -3   36.60    2.70
  -8  -4  -3   38.20    2.80
   8  -4   3   38.20    3.10
   8   4  -3   38.90    2.80
   8   4  -3   41.20    2.60
   8   4  -3   38.70    2.70
  -8   4   3   35.10    2.60
  -8  -4  -3   34.70    2.50
  -8   4   3   36.80    2.90
   8  -4   3   34.90    2.50
   8   4  -3   39.00    2.80
  -8  -4  -3   37.20    2.30
   8   4  -3   38.60    2.80
   8  -4   3   36.60    2.80
  -8  -4   3   39.30    2.90
   8  -4  -3   39.20    2.60
   8   4   3   37.10    2.50
   8   4   3   37.40    2.90
  -8   4  -3   38.40    2.40
  -8  -4   3   39.50    2.50
   8   4   3   35.00    2.80
  -8   4  -3   37.20    2.50
   8   4   3   39.10    2.70
   8   4   3   39.70    2.50
   8   4   3   39.00    2.80
   8  -4  -3   35.00    3.10
   8  -4  -3   41.70    2.80
   9  -4   3   37.50    2.50
   9   4  -3   36.40    2.70
  -9  -4  -3   40.10    2.50
  -9  -4  -3   33.50    3.00
   9   4  -3   43.10    2.90
   9   4  -3   40.60    2.60
   9   4  -3   38.50    2.50
   9   4  -3   42.50    2.80
  -9   4   3   39.40    2.80
   9  -4   3   42.30    2.90
  -9  -4  -3   45.10    2.50
  -9  -4  -3   41.80    2.30
   9   4  -3   41.90    2.70
   9  -4   3   40.40    2.70
   9   4   3   41.40    2.80
  -9  -4   3   36.90    2.90
  -9   4  -3   37.80    2.50
   9  -4  -3   43.70    3.00
   9  -4  -3   42.10    2.60
   9   4   3   40.40    2.60
  -9  -4   3   43.60    2.40
  -9  -4   3   44.00    2.60
   9  -4  -3   41.80    2.70
   9   4   3   43.30    2.80
   9   4   3   40.60    2.60
   9   4   3   39.80    2.70
 -10  -4  -3    1.90    0.50
  10   4  -3    3.00    0.60
  10  -4   3    2.30    0.70
 -10  -4  -3    3.20    0.50
  10   4  -3    2.40    0.60
  10   4  -3    3.10    0.60
  10   4  -3    2.80    0.70
 -10   4   3    2.10    0.60
 -10   4  -3    2.50    0.50
  10  -4  -3    1.80    0.50
  10   4   3    3.50    0.60
 -10  -4   3    2.40    0.60
  10   4   3    2.90    0.60
 -10  -4   3    3.70    0.70
  10  -4  -3    3.50    0.60
  10  -4  -3    2.80    0.70
 -10  -4   3    3.40    0.50
  10   4   3    2.50    0.50
  10   4   3    4.90    0.70
   0  -5   3  307.37   19.00
   0   5  -3  345.47   21.70
   0   5  -3  315.97   19.20
   0  -5   3  415.66   21.00
   0   5   3  387.86   20.00
   0   5   3  406.96   20.80
   0   5   3  354.06   19.60
   0  -5  -3  352.06   17.80
   0   5   3  357.16   18.10
   0  -5  -3  408.06   22.90
   0   5  -3  374.56   19.80
   0   5  -3  351.06   18.00
  -1  -5  -3    6.00    1.70
  -1   5   3    7.70    1.90
   1  -5   3    8.40    2.20
   1   5  -3    8.30    2.50
  -1   5   3    6.90    2.10
  -1  -5  -3    5.50    2.20
   1  -5   3    6.20    0.70
  -1   5   3    7.70    1.00
  -1  -5  -3    5.50    0.80
  -1   5  -3    5.00    1.50
   1   5   3    8.00    2.10
   1   5   3    7.10    1.00
  -1  -5   3    6.90    1.80
  -1   5  -3    8.10    1.90
  -1   5  -3    7.20    2.70
   1  -5  -3   12.80    3.20
  -1  -5   3    7.80    2.00
  -1   5  -3    7.90    1.10
  -1  -5   3    6.60    1.60
  -1   5  -3    8.00    1.30
   1  -5  -3    7.30    0.90
   2  -5   3    3.10    0.60
   2   5  -3    5.00    1.50
  -2  -5  -3    4.00    2.20
   2   5  -3    3.50    0.90
  -2   5   3    4.10    1.60
  -2  -5  -3    3.20    1.60
  -2   5   3    3.70    0.80
   2   5  -3    5.50    1.80
   2  -5   3    4.90    1.90
  -2   5   3    3.80    1.70
   2  -5  -3    3.90    1.60
   2   5   3    6.20    2.00
  -2   5  -3    4.30    0.80
   2   5   3    4.70    0.80
  -2   5  -3    4.30    1.40
   2   5   3    4.00    1.40
  -2  -5   3    6.00    2.00
  -2   5  -3    3.90    2.00
  -2  -5   3    4.60    1.60
  -2  -5   3    5.80    1.70
   2  -5  -3    4.90    0.90
   2   5   3    4.40    1.70
   2  -5  -3    4.40    2.20
  -2  -5   3    8.20    2.30
   2  -5  -3    4.70    0.70
  -2   5  -3    5.90    1.20
  -2   5  -3    4.30    1.50
   3   5  -3   13.20    2.80
  -3  -5  -3   15.80    3.50
   3  -5   3   15.40    1.40
  -3   5   3   15.10    3.20
  -3  -5  -3   15.30    1.30
  -3  -5  -3   17.30    3.10
  -3   5   3   13.60    2.50
  -3   5   3   13.30    1.40
   3   5  -3   13.30    1.50
   3  -5   3   13.70    1.20
   3  -5   3   13.80    3.30
  -3  -5  -3   14.70    3.50
  -3  -5   3   22.10    2.90
  -3   5  -3   14.90    1.60
   3   5   3   11.30    2.50
   3  -5  -3   13.50    3.50
  -3   5  -3   15.70    2.90
   3   5   3   15.20    3.40
  -3   5  -3   13.80    3.90
  -3  -5   3   12.70    2.70
   3  -5  -3   15.60    1.30
  -3   5  -3   16.00    1.70
   3  -5  -3   14.90    1.40
   3  -5  -3   14.50    1.40
   3   5   3   14.80    1.50
  -3  -5   3   15.20    3.50
   3  -5  -3   15.90    2.90
   4  -5   3  201.08    9.60
  -4  -5  -3  172.08    9.10
  -4  -5  -3  197.38   12.30
  -4  -5  -3  193.18    9.50
  -4   5   3  178.38    9.40
   4  -5   3  176.38    9.30
  -4   5   3  182.08    9.60
   4   5  -3  176.98   12.30
  -4   5   3  168.38   11.20
   4  -5  -3  189.58    9.60
  -4   5  -3  183.78    9.60
   4   5   3  182.88    9.50
   4  -5  -3  175.98   12.70
  -4   5  -3  177.58    9.50
  -4  -5   3  180.08   13.30
  -4   5  -3  206.28   10.20
  -4   5  -3  172.98   13.80
  -4   5  -3  176.48    9.20
   4  -5  -3  188.18    9.70
  -4   5  -3  188.88   12.10
   4  -5  -3  183.78    9.20
   4  -5  -3  181.58    9.10
   4   5   3  176.38   11.90
   4   5   3  182.68    9.60
  -4   5  -3  189.08    9.70
  -4   5  -3  172.58    9.20
   4   5   3  180.98    9.60
   4   5   3  181.48    9.30
   4  -5  -3  174.48    9.40
   5   5  -3   87.59    5.20
   5  -5   3   99.29    5.10
   5  -5   3   95.49    5.40
  -5   5   3   83.69    5.20
  -5  -5  -3   92.69    7.90
   5   5  -3   87.59    5.20
  -5  -5  -3  100.19    5.30
  -5   5   3   88.69    5.40
  -5   5   3   90.29    5.10
   5   5  -3   86.29    5.30
  -5   5   3   86.59    5.00
   5   5  -3   93.29    8.10
   5   5  -3   90.69    5.20
  -5  -5  -3   96.29    5.00
   5  -5   3  101.99    5.80
   5   5  -3   91.69    5.30
   5   5   3   93.99    5.40
   5  -5  -3   93.99    4.80
   5  -5  -3   90.09    5.00
   5   5   3   87.29    5.30
  -5   5  -3   93.79    5.10
  -5   5  -3   97.29    5.40
   5   5   3   95.19    5.30
   5  -5  -3   94.99    5.50
  -5   5  -3   99.59    8.10
   5   5   3   91.89    5.00
  -5   5  -3   86.89    5.00
  -5   5  -3   97.19    5.40
   5  -5  -3   88.09    5.30
  -5   5  -3   96.09    5.10
  -5   5  -3   92.19    5.50
   5   5   3   97.69    5.10
  -5   5  -3   93.29    5.00
   5   5   3   94.69    5.30
   5   5   3   90.09    8.10
   6   5  -3  182.78    9.50
  -6   5   3  172.08    9.00
   6   5  -3  167.38    9.20
  -6   5   3  171.78    9.10
   6   5  -3  175.68    9.30
  -6   5   3  168.18    9.20
  -6   5   3  182.68    9.50
  -6  -5  -3  166.48    9.40
   6  -5   3  172.88    9.90
  -6  -5  -3  183.28    9.10
   6   5  -3  176.48    9.30
   6   5  -3  180.08    9.30
   6  -5   3  183.48    9.20
   6  -5   3  178.78    9.30
   6   5   3  170.38    9.40
   6   5   3  178.98    9.50
   6   5   3  178.98    9.40
   6  -5  -3  181.78    9.30
   6  -5  -3  177.28    9.70
   6   5   3  184.78    9.10
  -6   5  -3  186.48    9.50
  -6   5  -3  173.78    9.10
  -6   5  -3  177.58    9.10
   6  -5  -3  177.28    9.20
   6  -5  -3  168.18    8.70
   6   5   3  181.58    9.00
  -6  -5   3  173.88    9.10
   6   5   3  176.18    9.40
  -7  -5  -3    8.00    1.30
  -7   5   3    5.50    1.20
   7   5  -3    5.10    1.00
  -7  -5  -3    5.80    0.90
   7   5  -3    5.80    1.10
   7   5  -3    5.00    1.20
   7   5  -3    5.80    1.00
   7  -5   3    6.10    1.30
  -7  -5  -3    6.00    0.80
   7   5  -3    9.30    1.20
   7  -5   3    5.80    1.20
  -7   5   3    3.90    0.80
  -7   5  -3    6.50    1.00
  -7   5  -3    5.30    0.90
   7   5   3    6.30    1.20
  -7  -5   3    5.40    0.80
  -7  -5   3    5.40    1.00
   7  -5  -3    5.90    1.10
   7   5   3    5.90    1.10
   7   5   3    6.00    1.30
   7  -5  -3    6.80    1.10
   7   5   3    6.30    1.20
   7  -5  -3    5.50    1.20
   7   5   3    5.60    0.90
  -7   5  -3    5.70    1.10
   8   5  -3  198.68   11.60
  -8  -5  -3  248.18   11.50
   8  -5   3  239.08   12.20
   8   5  -3  201.78   11.70
   8   5  -3  244.28   11.70
   8  -5   3  200.48   11.50
   8   5  -3  222.28   11.70
  -8  -5  -3  221.18   11.90
   8  -5   3  235.68   11.60
  -8   5   3  219.98   11.30
  -8  -5  -3  229.78   11.30
   8   5  -3  228.28   11.60
  -8   5   3  208.68   11.70
  -8   5  -3  200.78   11.40
  -8  -5   3  235.88   11.40
   8   5   3  250.17   11.80
   8  -5  -3  247.88   12.20
   8   5   3  211.78   11.60
  -8  -5   3  233.38   11.80
  -8   5  -3  229.88   11.40
   8  -5  -3  242.48   11.60
   8   5   3  228.98   11.40
   8   5   3  253.67   11.90
   8   5   3  217.08   11.40
   8  -5  -3  238.38   11.70
   8   5   3  240.68   11.70
   9  -5   3    2.10    0.80
   9  -5   3    2.90    0.80
  -9  -5  -3    3.50    0.60
  -9  -5  -3    3.40    0.60
   9   5  -3    3.90    0.80
  -9  -5  -3    3.10    0.50
   9   5  -3    4.30    0.80
   9   5  -3    2.70    0.80
   9   5  -3    3.60    0.90
  -9   5   3    3.00    0.70
   9   5  -3    2.70    0.70
  -9  -5   3    3.00    0.50
   9   5   3    4.10    0.70
   9   5   3    3.10    0.60
  -9  -5   3    3.20    0.60
   9  -5  -3    4.60    1.00
   9  -5  -3    3.00    0.70
   9   5   3    3.10    0.70
   9  -5  -3    2.60    0.60
   9   5   3    5.20    0.90
  -9   5  -3    2.80    0.60
   9   5   3    3.20    0.70
  10   5  -3    1.20    0.40
  10   5  -3    0.60    0.40
  10   5  -3    0.50    0.40
  10  -5   3    1.40    0.50
 -10  -5  -3    1.20    0.30
 -10   5   3    1.40    0.50
 -10  -5  -3    0.70    0.30
  10   5  -3    1.00    0.50
  10   5   3    0.40    0.40
  10   5   3    0.20    0.30
  10  -5  -3    0.30    0.40
  10   5   3    0.80    0.40
 -10  -5   3    0.30    0.30
 -10  -5   3    0.70    0.40
 -10   5  -3    0.80    0.40
  10  -5  -3    0.80    0.50
   0  -6  -3  967.30   45.80
   0   6  -3  919.21   46.00
   0   6  -3  957.70   46.00
   0   6   3  950.20   46.00
   0   6   3  938.41   49.20
   0  -6   3  968.80   51.19
   0  -6  -3  957.60   51.79
   0  -6  -3  886.81   45.50
   0   6  -3  985.80   48.30
  -1   6   3  306.77   17.50
  -1   6   3  295.27   18.20
   1  -6   3  298.07   18.30
   1   6  -3  297.67   17.10
   1  -6   3  303.57   14.60
   1   6  -3  285.57   15.00
  -1  -6  -3  314.77   14.80
  -1   6   3  292.07   15.10
   1   6  -3  275.17   15.10
  -1  -6  -3  287.97   19.90
  -1  -6  -3  281.37   14.60
  -1  -6  -3  313.67   17.80
  -1   6  -3  292.87   17.30
  -1  -6   3  298.47   17.90
   1  -6  -3  286.17   14.60
   1   6   3  287.87   18.00
   1   6   3  314.37   15.20
  -1   6  -3  315.27   15.20
  -1  -6   3  284.67   19.20
  -1   6  -3  286.87   19.70
   1  -6  -3  327.17   15.00
  -1   6  -3  305.87   15.30
   1  -6  -3  294.17   20.10
  -2   6   3   41.00    4.60
  -2   6   3   40.70    5.30
  -2   6   3   43.50    2.90
  -2  -6  -3   47.90    5.10
   2   6  -3   39.80    4.10
   2   6  -3   35.70    2.70
  -2  -6  -3   40.40    6.10
   2  -6   3   42.80    5.40
   2  -6   3   41.10    2.60
   2   6  -3   39.90    2.90
   2   6   3   41.60    4.90
   2  -6  -3   37.40    6.00
  -2   6  -3   44.20    4.90
   2  -6  -3   43.80    2.80
   2  -6  -3   45.40    2.60
  -2   6  -3   41.70    2.90
   2   6   3   44.80    2.90
  -2   6  -3   35.60    6.10
  -2   6  -3   45.70    3.10
  -3   6   3  133.59    7.10
  -3   6   3  135.09    7.30
  -3  -6  -3  142.29   10.00
   3  -6   3  140.59    7.20
  -3   6   3  142.39    7.50
  -3   6   3  127.19    9.40
  -3   6   3  131.99    7.00
  -3  -6  -3  140.49    7.20
  -3   6   3  119.49    7.20
   3  -6   3  134.19    7.00
  -3   6   3  135.59    7.10
   3   6   3  140.29    7.40
  -3   6  -3  130.29    7.20
   3   6   3  138.09    7.40
   3   6   3  127.19    7.00
   3   6   3  132.49    7.00
   3  -6  -3  141.69    7.00
  -3   6  -3  135.79    7.50
   3  -6  -3  127.99    6.80
  -3   6  -3  134.99    7.10
  -3   6  -3  125.09    9.80
   3   6   3  130.19   12.10
   3   6   3  137.99    7.30
   3  -6  -3  125.79    7.10
   3   6   3  138.99    7.10
   3  -6  -3  149.49    7.50
  -3   6  -3  132.59    7.10
  -3   6  -3  136.29    7.30
  -3   6  -3  131.59    7.00
   3   6   3  134.99    7.30
  -3   6  -3  134.59    7.00
  -3   6  -3  142.49    7.80
   4  -6   3   65.89    3.60
  -4   6   3   66.79    3.90
  -4   6   3   64.99    3.70
  -4   6   3   60.49    3.60
  -4  -6  -3   60.39    3.40
   4   6  -3   61.09    3.70
   4   6  -3   59.99    3.80
  -4  -6  -3   64.79    3.70
  -4  -6  -3   55.69    6.20
  -4   6   3   62.39    3.80
   4   6  -3   51.69    5.80
   4  -6   3   57.99    3.80
   4   6  -3   56.89    3.60
  -4   6   3   61.89    3.80
   4   6  -3   58.89    3.60
   4  -6  -3   62.09    3.80
   4   6   3   63.09    3.50
   4  -6  -3   62.39    3.90
  -4   6  -3   58.79    4.00
   4   6   3   57.29    3.60
   4  -6  -3   58.79    3.40
   4   6   3   61.89    4.00
  -4   6  -3   60.29    3.60
  -4   6  -3   53.29    6.10
   4   6   3   58.89    3.80
  -4   6  -3   61.09    3.60
  -4   6  -3   62.69    4.30
  -4   6  -3   59.69    3.90
  -4   6  -3   57.39    4.00
   4  -6  -3   60.09    3.90
   4   6   3   58.99    3.80
   4   6   3   60.79    3.60
  -4   6  -3   59.59    3.60
  -4   6  -3   63.29    3.60
   4  -6  -3   63.49    3.60
  -5   6   3   98.89    5.40
   5   6  -3   93.79    5.50
  -5   6   3  108.79    5.80
   5   6  -3  101.69    5.60
  -5  -6  -3  100.99    5.70
   5  -6   3  101.29    5.50
  -5   6   3   98.19    5.50
   5  -6   3  103.19    6.10
   5   6  -3   91.99    5.50
   5   6  -3   97.89    5.70
  -5   6   3   92.79    5.60
   5  -6   3  101.49    5.80
  -5  -6  -3   96.79    5.30
   5   6  -3   95.19    5.60
   5   6   3  104.99    5.80
   5  -6  -3   96.79    5.40
   5   6   3  100.19    5.60
  -5   6  -3   95.39    5.90
  -5   6  -3   91.39    5.40
   5   6   3   98.89    5.40
   5   6   3  106.99    5.50
   5   6   3  101.19    5.70
   5  -6  -3  100.29    5.70
   5  -6  -3  106.99    5.20
  -5   6  -3   97.29    5.50
  -5   6  -3  101.39    5.80
  -5   6  -3  103.49    5.50
   5   6   3  103.69    5.80
   5  -6  -3   97.99    5.90
  -5   6  -3   99.99    5.40
  -6   6   3   33.90    2.70
   6  -6   3   34.80    2.90
  -6  -6  -3   35.00    2.70
  -6   6   3   35.30    2.30
   6   6  -3   34.00    2.50
   6  -6   3   35.10    2.50
   6   6  -3   36.10    2.60
   6   6  -3   37.20    2.80
   6   6  -3   33.00    2.50
  -6   6   3   32.70    2.30
   6  -6   3   32.70    2.80
   6  -6   3   29.80    2.90
   6   6  -3   31.90    2.40
  -6  -6  -3   35.00    2.30
   6   6   3   35.00    2.70
  -6  -6   3   32.30    2.30
   6   6   3   34.90    2.30
   6  -6  -3   33.70    2.70
   6  -6  -3   32.30    2.00
   6   6   3   42.10    3.00
   6  -6  -3   36.00    2.80
   6   6   3   33.20    2.50
   6   6   3   35.40    2.60
   6   6   3   33.00    2.20
  -6   6  -3   34.00    2.90
  -6   6  -3   35.90    2.40
  -6   6  -3   32.00    2.40
   7   6  -3   39.70    2.70
   7   6  -3   39.10    2.70
  -7  -6  -3   42.30    3.10
  -7   6   3   40.10    3.00
  -7   6   3   40.80    2.60
   7   6  -3   44.90    2.90
   7  -6   3   42.90    3.40
   7   6  -3   41.40    3.00
  -7  -6  -3   43.90    2.70
   7   6  -3   42.50    3.10
  -7  -6  -3   40.60    2.50
   7  -6   3   41.90    2.90
   7  -6  -3   42.50    2.60
   7   6   3   39.70    2.90
   7  -6  -3   48.60    3.20
   7   6   3   46.50    2.90
  -7  -6   3   37.10    2.70
  -7   6  -3   41.10    2.70
   7  -6  -3   36.90    2.90
  -7   6  -3   45.50    2.70
   7   6   3   45.00    2.90
   7   6   3   44.10    3.10
   7   6   3   44.50    2.70
   8  -6   3    9.60    1.50
  -8   6   3    8.20    0.90
  -8  -6  -3    6.70    1.20
   8   6  -3    9.60    1.10
   8   6  -3    9.40    1.20
  -8  -6  -3    8.90    1.00
  -8  -6  -3    9.60    1.00
   8  -6   3    8.30    1.10
   8   6  -3    6.40    1.20
   8   6  -3    9.40    1.10
   8   6  -3    9.10    1.20
  -8   6   3    9.30    1.20
   8  -6   3    8.50    1.10
   8  -6  -3    9.10    1.20
  -8  -6   3    8.30    1.10
  -8   6  -3    7.40    1.00
   8  -6  -3   10.40    1.50
   8   6   3   10.20    1.30
   8  -6  -3    5.40    0.90
   8   6   3    8.80    1.20
  -8   6  -3    7.10    0.90
  -8  -6   3    7.10    0.90
   8   6   3    8.90    1.30
   8   6   3    8.10    0.90
   8   6   3    8.20    1.10
  -9  -6  -3    4.80    0.70
   9   6  -3    6.20    0.80
   9  -6   3    5.40    0.70
  -9   6   3    6.00    0.90
   9   6  -3    6.30    0.90
   9   6  -3    4.80    0.80
   9  -6   3    3.90    1.00
  -9  -6  -3    4.50    0.60
   9   6  -3    5.20    0.70
   9   6  -3    4.90    0.70
  -9  -6  -3    4.20    0.60
   9   6   3    4.70    0.70
   9  -6  -3    3.40    0.60
   9   6   3    5.40    0.80
   9   6   3    5.10    0.80
  -9   6  -3    4.30    0.60
  -9  -6   3    4.90    0.70
   9  -6  -3    5.00    0.90
  -9  -6   3    4.70    0.60
   9  -6  -3    5.50    0.60
   0   7   3  114.79    6.60
   0  -7  -3  131.69    6.60
   0   7  -3  116.19    6.80
   0   7  -3  114.79    6.50
   0   7   3  126.19    6.90
   0  -7  -3  139.69    6.90
   0   7   3  127.69    6.70
   0   7  -3  125.39    6.70
   0   7   3  130.29    7.00
   0   7   3  129.39    6.80
   0   7  -3  125.29    7.10
   0   7  -3  120.09    9.10
   0   7  -3  137.29    7.20
   0   7  -3  126.29    6.70
   0   7  -3  122.79    6.60
   0   7   3  128.69    6.60
   0  -7  -3  117.99    9.50
   0   7   3  134.19    7.20
  -1   7   3   40.50    2.80
   1   7  -3   38.10    2.60
   1   7  -3   39.80    2.50
   1  -7   3   44.50    2.60
  -1  -7  -3   41.60    2.70
  -1   7   3   42.00    2.60
   1   7  -3   43.40    3.00
  -1   7   3   39.40    2.60
  -1  -7  -3   37.90    4.70
  -1   7   3   41.60    3.00
  -1   7   3   40.20    2.70
   1   7  -3   36.50    2.90
  -1   7   3   40.60    2.90
  -1  -7  -3   38.00    2.40
   1   7  -3   38.40    4.80
   1   7  -3   36.80    2.60
  -1   7   3   43.70    2.70
   1   7  -3   39.70    2.60
  -1   7   3   38.30    4.60
   1  -7  -3   44.50    2.60
  -1   7  -3   38.50    3.10
   1   7   3   40.30    2.80
   1   7   3   42.90    2.70
   1   7   3   42.90    3.00
   1   7   3   40.70    2.60
  -1   7  -3   41.00    2.60
   1   7   3   40.00    2.80
   1  -7  -3   37.10    2.70
  -1   7  -3   39.70    2.90
  -1   7  -3   38.00    2.50
   1   7   3   39.50    2.60
  -1   7  -3   40.90    2.60
  -1   7  -3   41.80    3.10
  -1   7  -3   36.60    5.00
  -1   7  -3   42.30    2.70
  -2   7   3   47.10    3.10
  -2   7   3   45.70    3.20
   2  -7   3   44.00    2.80
  -2  -7  -3   40.70    5.30
  -2   7   3   45.20    2.80
  -2   7   3   40.20    2.60
  -2   7   3   42.50    2.80
  -2   7   3   39.50    2.90
  -2   7   3   41.10    5.20
   2   7  -3   42.40    2.90
  -2  -7  -3   43.60    2.80
  -2   7   3   44.60    2.80
   2  -7  -3   42.30    2.90
  -2   7  -3   43.80    2.90
   2   7   3   44.00    2.70
  -2   7  -3   42.00    2.70
   2   7   3   42.80    3.00
  -2   7  -3   38.80    5.20
  -2   7  -3   43.70    2.70
  -2   7  -3   42.50    2.90
  -2   7  -3   45.20    3.20
  -2   7  -3   45.60    3.30
   2   7   3   47.70    2.70
   2   7   3   44.00    2.80
   2   7   3   45.10    3.10
   2  -7  -3   40.10    2.50
  -2   7  -3   41.70    2.90
   2  -7  -3   45.20    2.70
   2   7   3   44.80    3.00
  -2   7  -3   37.70    2.80
   2   7   3   46.40    3.10
  -3   7   3  318.57   15.50
  -3  -7  -3  323.97   15.30
  -3   7   3  310.57   15.50
  -3   7   3  271.97   15.20
  -3   7   3  295.17   15.00
  -3   7   3  303.17   15.20
   3  -7   3  309.37   15.30
  -3   7   3  270.07   17.80
  -3   7   3  323.87   15.30
   3  -7   3  293.27   15.00
  -3  -7  -3  281.57   18.50
  -3   7   3  314.97   15.10
  -3   7  -3  281.17   18.30
  -3   7  -3  325.17   15.70
  -3   7  -3  296.57   15.10
  -3   7  -3  292.57   15.20
   3   7   3  307.87   15.10
  -3   7  -3  286.37   15.10
   3   7   3  300.57   15.50
  -3   7  -3  296.97   15.90
   3  -7  -3  315.57   15.50
   3   7   3  319.17   15.10
   3  -7  -3  318.57   15.10
   3   7   3  299.07   15.40
  -3   7  -3  320.07   15.10
   3  -7  -3  299.47   15.20
   3   7   3  302.47   15.40
  -3   7  -3  309.47   15.50
  -3   7  -3  297.07   15.20
   3   7   3  306.47   15.40
   3  -7  -3  301.77   14.90
   3   7   3  282.47   15.10
  -4  -7  -3   97.69    5.30
  -4   7   3   89.59    5.00
  -4   7   3   93.69    5.10
   4   7  -3   85.19    5.30
  -4   7   3   90.69    5.10
   4   7  -3   81.09    5.10
  -4   7   3   99.19    5.30
   4  -7   3   98.59    5.80
   4  -7   3   96.79    5.10
  -4  -7  -3   90.39    5.00
  -4   7   3   89.69    5.50
   4  -7   3   92.89    5.40
   4   7  -3   84.49    5.20
  -4   7   3  100.49    5.50
  -4   7  -3   94.19    5.20
  -4   7  -3   93.99    5.10
   4  -7  -3   89.09    5.50
   4   7   3   96.69    5.50
  -4   7  -3   84.89    5.60
   4  -7  -3   90.99    4.90
  -4   7  -3   92.29    5.70
   4   7   3   95.89    5.40
  -4   7  -3   88.19    5.30
   4  -7  -3   95.59    5.10
   4   7   3   97.09    5.10
  -4   7  -3   96.89    5.10
   4   7   3   96.39    5.10
  -4   7  -3   88.69    5.20
   4   7   3   88.69    5.30
   4  -7  -3   92.69    5.30
  -5   7   3  208.08   10.90
   5   7  -3  198.18   11.00
   5   7  -3  209.68   11.20
   5   7  -3  209.28   11.00
   5  -7   3  219.98   11.70
  -5   7   3  225.28   11.10
  -5  -7  -3  214.18   10.90
  -5   7   3  230.58   11.40
   5  -7   3  212.88   11.10
  -5  -7  -3  224.98   11.30
   5   7  -3  205.78   11.10
   5  -7   3  211.98   11.30
   5  -7   3  196.08   11.00
   5   7   3  225.08   11.30
   5  -7  -3  202.58   11.40
  -5   7  -3  224.58   11.00
   5  -7  -3  225.58   11.30
   5   7   3  228.28   11.40
  -5   7  -3  217.28   11.40
  -5   7  -3  234.18   11.50
   5   7   3  221.88   10.90
   5  -7  -3  216.78   10.90
   5  -7  -3  213.58   10.70
  -5   7  -3  219.58   11.00
   5   7   3  211.88   11.30
   5   7   3  207.38   11.00
  -5   7  -3  220.68   11.00
  -5   7  -3  220.48   11.00
   5   7   3  211.98   11.00
  -6   7   3   67.09    4.30
   6   7  -3   66.09    4.10
   6   7  -3   66.09    4.10
  -6   7   3   74.99    4.10
   6  -7   3   72.59    4.40
   6  -7   3   73.39    4.20
  -6  -7  -3   78.29    4.10
   6   7  -3   73.29    4.30
   6   7  -3   72.79    4.40
  -6  -7  -3   75.69    4.50
   6   7  -3   71.59    4.20
   6  -7   3   76.09    4.80
   6   7   3   66.79    4.30
  -6   7  -3   76.99    4.10
   6  -7  -3   71.79    4.30
  -6   7  -3   69.19    4.00
  -6   7  -3   72.39    4.20
   6   7   3   74.19    4.10
   6  -7  -3   71.49    3.80
   6  -7  -3   69.79    4.50
   6   7   3   66.59    4.30
   6   7   3   71.89    4.50
  -6   7  -3   72.59    4.10
   6   7   3   75.19    4.00
   6   7   3   74.39    4.30
  -6   7  -3   77.19    4.50
   7  -7   3   10.30    0.90
   7  -7   3   11.60    1.50
   7   7  -3   10.70    1.40
  -7  -7  -3    9.80    0.90
  -7  -7  -3   11.10    1.20
  -7   7   3   10.70    1.30
   7   7  -3   11.00    1.50
   7   7  -3   11.40    1.30
  -7  -7  -3   11.70    1.30
   7  -7   3   11.00    1.30
   7   7  -3   11.20    1.20
  -7   7   3   11.80    1.10
   7   7  -3   10.40    1.10
   7  -7  -3    6.50    1.30
   7   7   3    9.10    1.20
  -7  -7   3    9.50    1.20
   7  -7  -3   10.60    1.00
  -7   7  -3   10.60    1.10
  -7   7  -3   10.70    1.30
   7  -7  -3   10.50    1.30
   7   7   3   10.30    1.10
   7   7   3   11.50    1.20
   7   7   3   11.10    1.30
   7   7   3   10.00    1.40
  -8  -7  -3   52.59    2.80
   8   7  -3   52.79    3.20
   8   7  -3   46.40    2.90
  -8   7   3   51.39    2.90
  -8   7   3   55.49    3.20
  -8  -7  -3   52.99    2.90
   8  -7   3   48.40    3.30
   8  -7   3   55.09    3.00
   8   7  -3   49.10    3.00
   8   7  -3   54.49    3.10
   8  -7   3   54.39    3.00
   8   7  -3   53.29    3.10
   8   7   3   53.19    3.00
   8  -7  -3   49.80    3.20
   8   7   3   55.59    3.10
  -8   7  -3   49.50    2.80
   8   7   3   57.09    3.20
  -8   7  -3   57.69    3.00
  -8  -7   3   47.70    2.90
   8   7   3   54.69    2.90
   8   7   3   45.30    3.10
   8  -7  -3   52.79    3.10
   0   8  -3   26.10    2.30
   0  -8  -3   27.80    1.90
   0   8  -3   26.40    2.20
   0   8   3   28.30    2.30
   0   8   3   28.50    2.40
   0   8  -3   25.10    2.00
   0   8  -3   28.70    2.40
   0   8   3   27.90    2.00
   0   8   3   27.10    2.00
   0   8   3   24.60    2.00
   0   8  -3   27.90    2.00
   0  -8  -3   28.40    2.20
   0   8  -3   23.50    2.10
   0   8   3   27.80    2.20
   0   8  -3   26.90    2.00
   0   8   3   26.70    2.40
  -1   8   3  274.17   14.80
  -1   8   3  295.17   15.00
   1   8  -3  319.67   15.40
   1   8  -3  293.27   14.90
  -1   8   3  298.77   15.00
   1   8  -3  293.37   14.80
  -1   8   3  316.27   15.30
  -1   8   3  291.07   15.10
  -1   8   3  301.97   14.90
  -1  -8  -3  284.37   14.70
  -1   8   3  299.97   15.40
   1   8  -3  304.87   15.00
   1   8  -3  278.47   14.70
   1  -8   3  294.37   14.90
   1   8   3  303.07   15.00
  -1   8  -3  298.17   15.10
   1   8   3  298.77   14.90
   1   8   3  301.47   14.90
   1  -8  -3  275.07   15.10
   1  -8  -3  303.37   14.80
  -1   8  -3  304.97   14.80
   1   8   3  306.57   15.40
  -1   8  -3  282.67   15.40
   1   8   3  308.97   15.20
  -1   8  -3  312.07   15.00
  -1   8  -3  298.07   15.50
   1   8   3  299.67   15.20
  -1   8  -3  307.47   15.00
  -1   8  -3  298.87   14.90
  -2   8   3  281.07   13.80
  -2   8   3  262.97   13.70
   2   8  -3  262.47   13.70
  -2   8   3  263.17   13.90
   2   8  -3  264.37   14.10
   2  -8   3  282.17   13.90
   2   8  -3  250.37   13.60
  -2  -8  -3  280.97   13.90
  -2   8   3  268.57   13.70
   2  -8   3  256.47   13.60
  -2  -8  -3  263.47   13.60
  -2   8   3  274.57   13.80
  -2   8   3  288.07   14.10
  -2   8   3  273.17   14.30
   2   8   3  273.57   13.80
   2  -8  -3  274.37   13.70
  -2   8  -3  284.57   13.80
   2   8   3  277.67   14.30
   2   8   3  283.97   13.80
   2   8   3  297.17   14.20
  -2   8  -3  279.67   13.70
  -2   8  -3  275.07   13.90
  -2   8  -3  284.57   14.10
   2   8   3  289.47   14.10
   2  -8  -3  273.97   14.10
  -2   8  -3  250.67   14.20
  -2   8  -3  280.17   13.90
   2  -8  -3  260.57   13.50
   2   8   3  283.37   13.80
  -2   8  -3  280.07   14.50
  -3   8   3   57.49    3.80
  -3  -8  -3   54.79    3.30
   3  -8   3   58.29    4.10
  -3   8   3   61.39    3.60
   3  -8   3   57.89    3.40
  -3   8   3   53.99    3.60
  -3   8   3   58.39    3.50
   3  -8   3   60.19    3.80
  -3   8   3   60.49    3.50
  -3   8   3   58.79    3.90
  -3  -8  -3   63.09    3.70
   3   8   3   57.59    3.60
   3   8   3   59.19    3.80
   3   8   3   61.99    3.80
   3  -8  -3   58.09    3.80
  -3   8  -3   59.49    3.90
   3   8   3   59.69    3.90
  -3   8  -3   55.19    3.80
   3  -8  -3   49.20    3.40
   3   8   3   57.99    3.50
   3  -8  -3   58.49    3.30
  -3   8  -3   59.29    3.50
  -3   8  -3   57.39    3.60
   3   8   3   63.79    3.50
  -3   8  -3   57.79    3.50
   3   8   3   52.69    3.70
   3  -8  -3   58.19    3.60
  -3   8  -3   61.79    3.60
  -3   8  -3   63.29    4.10
  -4  -8  -3   23.50    1.80
  -4   8   3   27.00    1.90
   4  -8   3   25.90    2.10
  -4   8   3   27.00    1.90
  -4  -8  -3   25.10    2.10
  -4   8   3   23.20    1.90
   4  -8   3   27.40    2.50
   4  -8   3   24.00    2.00
  -4   8   3   26.50    2.30
  -4   8   3   26.70    2.40
   4  -8   3   24.90    2.30
  -4   8   3   26.00    2.10
   4   8   3   31.00    2.30
   4  -8  -3   25.80    2.20
  -4   8  -3   26.30    2.20
   4  -8  -3   25.60    2.40
   4  -8  -3   26.50    2.00
   4  -8  -3   24.90    1.80
   4   8   3   26.40    2.20
  -4   8  -3   26.40    2.50
  -4   8  -3   22.30    1.80
   4   8   3   26.60    2.20
   4   8   3   27.50    1.90
  -4   8  -3   24.30    1.90
  -4   8  -3   26.50    2.00
   4   8   3   25.70    1.90
  -4   8  -3   26.40    2.50
   5  -8   3    8.70    1.20
   5   8  -3    8.40    1.10
   5   8  -3    6.60    1.20
  -5  -8  -3    8.40    1.10
   5  -8   3    7.70    1.50
  -5  -8  -3    9.10    1.20
   5  -8   3    6.90    1.40
  -5   8   3    8.80    1.10
  -5   8   3    6.70    1.20
  -5   8   3    8.00    1.10
   5  -8   3    8.50    1.50
  -5   8  -3    4.80    1.20
   5   8   3    8.20    1.30
   5   8   3    8.80    1.00
  -5   8  -3    6.50    1.00
   5  -8  -3    6.90    0.90
   5  -8  -3    6.60    0.80
   5   8   3    7.40    1.10
  -5   8  -3    7.70    1.00
  -5   8  -3    8.20    1.10
   5   8   3    7.40    1.00
  -5   8  -3    7.00    1.40
   5  -8  -3    6.10    1.10
   5   8   3    6.30    1.10
  -5   8  -3    6.40    1.10
   6   8  -3   10.80    1.10
  -6  -8  -3    8.60    1.20
   6  -8   3   11.20    1.50
   6  -8   3    7.70    1.20
   6   8  -3   10.40    1.30
   6  -8   3    9.30    1.10
   6   8  -3    6.30    1.00
  -6  -8  -3   10.30    1.20
  -6   8   3   11.10    1.50
  -6   8   3   11.20    1.20
   6  -8  -3    9.60    0.80
  -6   8  -3   11.10    1.10
   6   8   3    9.20    1.20
  -6   8  -3    8.60    1.10
   6  -8  -3   10.80    1.10
  -6   8  -3    9.90    1.10
   6   8   3   10.20    1.00
  -6   8  -3    8.70    1.00
   6   8   3    9.50    1.00
   6   8   3    9.40    1.20
   6  -8  -3   11.80    1.30
  -6   8  -3    6.70    1.10
   6   8   3   10.30    1.40
   7   8  -3   10.80    1.20
   7  -8   3   12.20    1.20
   7  -8   3   11.40    1.10
  -7   8   3   10.50    1.00
   7  -8   3   10.90    0.80
  -7  -8  -3   11.80    1.20
  -7  -8  -3   10.90    0.90
   7   8  -3   11.80    1.30
  -7   8   3   11.40    1.20
   7   8  -3   11.40    1.10
   7  -8   3   10.60    1.40
   7  -8  -3   12.50    1.20
   7   8   3   12.40    1.20
   7   8   3   11.10    1.00
   7   8   3   11.70    1.40
  -7   8  -3   12.60    1.20
   7  -8  -3   12.60    1.10
   7   8   3   13.30    1.40
   7   8   3   11.00    1.00
  -7   8  -3   11.80    1.20
   8  -8   3    2.50    0.50
  -8   8   3    3.90    0.60
  -8  -8  -3    3.60    0.50
   8   8  -3    3.80    0.50
   8  -8   3    2.00    0.50
   8   8  -3    1.70    0.50
   8   8  -3    2.10    0.50
   8   8   3    2.10    0.50
   8   8   3    4.00    0.50
   8  -8  -3    4.50    0.60
   8   8   3    4.30    0.60
  -8   8  -3    2.90    0.50
   8   8   3    3.00    0.60
   0   9   3   66.69    3.80
   0   9   3   60.99    4.20
   0  -9   3   57.99    3.60
   0   9  -3   65.89    3.70
   0   9   3   66.39    4.00
   0   9   3   59.89    4.00
   0   9  -3   67.49    4.30
   0   9  -3   66.29    3.80
   0   9   3   62.89    3.70
   0  -9  -3   68.99    3.70
   0   9  -3   60.39    4.00
   0   9  -3   67.79    3.80
   0   9  -3   69.49    4.00
   0   9   3   67.29    4.10
   0   9   3   65.19    3.80
  -1  -9  -3   13.30    1.60
  -1  -9  -3   14.10    1.20
   1   9  -3   12.60    1.60
  -1   9   3   13.20    1.30
  -1   9   3   13.40    1.60
  -1   9   3   11.60    1.50
   1   9  -3   14.00    1.40
   1  -9   3   12.80    1.40
  -1   9   3   13.90    1.30
  -1   9   3   14.00    1.50
  -1   9   3   13.30    1.60
   1   9  -3   11.90    1.60
  -1   9   3   11.80    1.60
   1   9  -3   11.80    1.30
   1   9  -3   13.00    1.30
  -1   9  -3   15.70    1.60
   1  -9  -3   13.10    1.50
   1   9   3   12.20    1.50
  -1   9  -3   12.60    1.70
   1  -9  -3   11.90    1.30
   1   9   3   12.30    1.40
   1   9   3   13.60    1.60
  -1   9  -3   10.00    1.60
   1   9   3   12.50    1.40
  -1   9  -3   13.60    1.40
   1   9   3   12.00    1.30
   1   9   3   12.70    1.40
  -1   9  -3   13.70    1.30
   1  -9  -3   10.90    1.20
  -1   9  -3   14.30    1.50
   2   9  -3    9.90    1.20
  -2   9   3    9.50    1.20
  -2   9   3   11.70    1.30
  -2   9   3   12.90    1.50
  -2  -9  -3   10.80    1.20
  -2   9   3   10.30    1.20
   2  -9   3    7.80    1.40
   2   9  -3   11.70    1.10
  -2  -9  -3   11.20    1.40
   2  -9   3   11.30    1.20
  -2   9   3   10.60    1.50
  -2   9   3   12.00    1.60
   2  -9   3   12.70    1.30
   2   9  -3    8.40    1.30
  -2   9  -3   11.20    1.40
  -2   9  -3   10.70    1.60
   2   9   3   11.00    1.40
   2  -9  -3   10.00    1.10
  -2   9  -3   10.40    1.20
   2   9   3   13.30    1.40
   2   9   3    9.00    1.50
   2   9   3   10.80    1.30
  -2   9  -3    7.00    1.20
   2  -9  -3    9.50    1.30
  -2   9  -3    9.20    1.30
   2   9   3    9.60    1.20
  -2   9  -3   13.30    1.70
   2   9   3    9.20    1.20
   2  -9  -3   10.00    1.50
  -3   9   3   90.29    4.90
   3  -9   3   94.19    5.00
  -3   9   3   89.39    5.00
   3  -9   3   88.99    5.40
  -3  -9  -3   90.69    5.10
  -3   9   3   85.49    5.00
  -3   9   3   94.59    5.50
   3  -9   3   91.49    5.20
  -3   9   3   89.99    4.90
  -3   9   3   95.39    5.30
  -3   9  -3   81.19    5.00
  -3   9  -3   96.19    4.90
  -3   9  -3   81.29    4.90
   3  -9  -3   91.09    5.00
   3   9   3   91.09    4.90
   3  -9  -3   90.59    4.70
   3   9   3   91.79    5.00
  -3   9  -3   84.09    5.00
   3   9   3   84.59    5.10
  -3   9  -3   91.69    5.40
   3   9   3   93.89    5.20
  -3   9  -3   88.29    5.40
   3   9   3   79.09    4.90
  -4   9   3   20.20    1.50
  -4   9   3   21.60    1.60
  -4  -9  -3   17.70    1.40
   4  -9   3   20.90    2.00
  -4   9   3   20.90    1.80
  -4   9   3   17.30    1.70
   4  -9   3   20.80    1.80
  -4   9   3   20.10    1.80
  -4   9   3   20.70    1.70
  -4  -9  -3   20.00    1.70
   4  -9   3   18.90    2.00
   4  -9  -3   21.50    1.80
   4  -9  -3   20.50    1.50
  -4   9  -3   20.20    2.20
  -4   9  -3   22.20    1.70
   4  -9  -3   14.90    1.70
  -4   9  -3   16.90    1.70
   4  -9  -3   19.90    1.70
   4   9   3   21.60    1.60
  -4   9  -3   20.90    2.10
   4   9   3   18.90    1.70
  -4   9  -3   21.50    1.90
   4   9   3   19.70    1.70
  -4   9  -3   21.10    1.70
   4   9   3   22.30    1.90
   4   9   3   18.00    1.60
  -5   9   3   14.70    1.30
  -5  -9  -3   13.80    1.30
   5  -9   3   11.90    1.80
  -5  -9  -3   11.20    1.40
   5  -9   3   13.00    1.70
  -5   9   3   13.50    1.40
   5  -9   3   14.90    1.80
   5  -9  -3   11.10    1.10
  -5   9  -3   13.80    1.30
  -5   9  -3   11.60    1.50
  -5   9  -3   12.90    1.70
   5   9   3   13.70    1.30
   5   9   3   15.10    1.60
   5   9   3   13.20    1.50
   5  -9  -3   14.30    1.30
   5   9   3   12.00    1.50
  -5   9  -3   14.60    1.20
   5  -9  -3   13.20    1.10
  -5   9  -3   15.00    1.30
  -5   9  -3   13.60    1.20
   5   9   3   13.00    1.20
   6  -9   3   11.40    0.90
   6  -9   3    9.10    0.90
   6  -9   3    8.10    1.20
  -6   9   3    9.80    1.30
  -6   9   3   11.00    1.00
  -6  -9  -3   11.20    1.10
   6  -9   3   10.90    1.20
   6   9   3   11.70    1.00
   6   9   3   12.00    1.20
   6   9   3   10.30    1.30
   6   9   3    8.80    1.00
  -6   9  -3   11.70    1.00
   6   9   3   12.10    1.40
  -6   9  -3   11.00    1.00
   6  -9  -3   11.50    1.10
   6  -9  -3   10.50    1.00
  -6   9  -3   11.40    1.00
  -7   9   3   21.60    1.40
  -7  -9  -3   22.00    1.30
   7  -9   3   21.90    1.50
  -7   9   3   20.40    1.30
   7   9   3   17.10    1.40
  -7   9  -3   24.20    1.40
   7  -9  -3   24.30    1.50
  -7   9  -3   21.70    1.30
   7  -9  -3   25.20    1.60
   7   9   3   16.80    1.40
   0  10  -3  160.98    8.40
   0  10  -3  158.88    7.80
   0  10  -3  159.18    8.10
   0 -10   3  139.19    7.90
   0 -10  -3  168.78    7.90
   0  10   3  152.78    8.20
   0  10   3  137.69    7.90
   0 -10  -3  155.48    8.20
   0  10  -3  164.98    7.90
   0  10  -3  155.48    8.00
   0  10   3  156.68    8.00
   0  10   3  147.89    7.90
   0  10   3  143.29    8.00
   0  10   3  144.69    7.90
   0  10   3  160.48    8.40
   1  10  -3   56.29    3.10
   1 -10   3   50.59    3.20
  -1  10   3   53.29    3.20
  -1  10   3   51.09    3.30
   1  10  -3   50.79    3.10
  -1 -10  -3   51.99    3.40
   1  10  -3   52.99    3.50
  -1  10   3   55.59    3.20
  -1  10   3   52.39    3.50
   1  10  -3   51.99    3.10
  -1  10   3   51.49    3.30
  -1  10   3   53.59    3.20
  -1 -10  -3   56.29    3.20
  -1  10  -3   53.19    3.50
   1  10   3   53.79    3.20
  -1  10  -3   54.89    3.10
   1 -10  -3   58.79    3.20
  -1  10  -3   57.69    3.20
   1  10   3   53.39    3.30
   1  10   3   52.49    3.40
   1 -10  -3   53.19    3.00
   1  10   3   46.50    3.10
  -1  10  -3   53.59    3.20
   1  10   3   46.20    3.10
  -1  10  -3   54.39    3.40
  -1  10  -3   48.00    3.20
   1  10   3   53.79    3.60
   1 -10  -3   52.39    3.40
  -2  10   3    6.70    1.20
  -2 -10  -3    4.60    1.00
  -2  10   3    5.70    1.10
   2 -10   3    5.30    0.90
   2 -10   3    6.20    1.10
   2  10  -3    4.90    0.70
  -2  10   3    4.60    0.80
  -2  10   3    6.20    0.90
  -2  10   3    7.70    1.00
  -2  10   3    6.00    0.90
   2  10   3    6.50    0.90
   2  10   3    6.80    1.10
   2  10   3    7.50    1.10
  -2  10  -3    7.50    0.90
  -2  10  -3    5.90    1.20
   2 -10  -3    5.00    0.90
  -2  10  -3    4.50    0.80
   2  10   3    8.10    1.10
   2 -10  -3    5.30    0.80
   2  10   3    4.60    0.70
  -2  10  -3    3.20    0.90
   2  10   3    5.30    0.90
  -2  10  -3    6.30    0.90
   2 -10  -3    5.20    1.10
  -2  10  -3    5.70    1.50
  -3  10   3   66.79    4.00
  -3 -10  -3   71.19    4.40
   3 -10   3   63.49    3.70
  -3 -10  -3   58.89    3.50
  -3  10   3   65.89    3.80
   3 -10   3   59.59    3.80
  -3  10   3   64.19    3.60
  -3  10   3   66.39    3.50
  -3  10   3   67.39    3.60
  -3 -10  -3   57.89    3.70
  -3  10   3   62.59    3.60
  -3  10  -3   62.99    4.10
  -3  10  -3   66.49    3.70
   3  10   3   61.39    3.70
  -3  10  -3   59.29    4.00
   3  10   3   63.19    3.60
   3 -10  -3   63.89    3.60
  -3  10  -3   60.19    3.60
   3  10   3   63.99    3.70
  -3  10  -3   63.99    3.50
  -3  10  -3   65.59    3.70
   3 -10  -3   64.79    3.40
   3  10   3   59.09    3.50
   3  10   3   63.59    3.60
  -4  10   3   58.19    3.30
  -4  10   3   55.59    3.20
  -4  10   3   57.99    3.10
   4 -10   3   57.49    3.40
  -4 -10  -3   51.89    3.10
  -4  10   3   60.09    3.20
   4 -10  -3   60.19    3.00
  -4  10  -3   55.79    3.30
  -4  10  -3   54.39    3.10
   4  10   3   57.39    3.30
   4  10   3   57.19    3.30
  -4  10  -3   58.69    3.40
   4  10   3   59.89    3.20
  -4  10  -3   54.99    3.20
  -4  10  -3   56.29    3.30
  -4  10  -3   55.39    3.50
   4 -10  -3   54.69    3.20
   4  10   3   58.99    3.20
   5 -10   3   18.70    1.20
  -5  10   3   16.50    1.20
  -5  10   3   18.20    1.30
   5 -10   3   19.50    1.50
   5 -10  -3   18.10    1.30
  -5  10  -3   18.80    1.30
   5  10   3   17.30    1.20
   5  10   3   16.90    1.20
  -5  10  -3   18.00    1.30
   5 -10  -3   17.80    1.40
   5  10   3   19.10    1.40
   5 -10  -3   18.70    1.10
  -5  10  -3   16.60    1.20
  -5  10  -3   21.00    1.30
   5  10   3   17.50    1.40
   0  11  -3   28.90    1.80
   0 -11  -3   30.70    1.80
   0  11   3   29.60    1.90
   0  11   3   30.60    1.90
   0  11  -3   30.50    2.00
   0  11   3   29.50    2.00
   0  11  -3   28.30    1.90
   0  11   3   28.50    1.80
   0 -11  -3   30.60    1.90
   0  11   3   25.80    2.10
   0  11  -3   27.30    2.10
  -1  11   3   16.50    1.30
   1 -11   3   12.90    1.10
  -1  11   3   15.70    1.50
  -1  11   3   17.60    1.70
  -1 -11  -3   15.20    1.00
   1  11  -3   14.40    1.20
   1  11  -3   13.60    1.20
  -1  11   3   16.50    1.20
  -1  11   3   19.30    1.40
   1 -11  -3   15.10    1.20
  -1  11  -3   15.40    1.60
   1 -11  -3   14.90    1.00
  -1  11  -3   15.60    1.20
  -1  11  -3   14.10    1.10
   1  11   3   15.40    1.20
   1  11   3   15.90    1.30
   1  11   3   14.40    1.20
  -1  11  -3   15.90    1.20
  -1  11  -3   16.00    1.30
   1  11   3   16.20    1.30
   1 -11  -3   13.30    1.10
  -2  11   3   17.40    1.40
  -2  11   3   19.00    1.80
  -2  11   3   19.20    1.40
  -2  11   3   20.50    1.30
  -2 -11  -3   17.50    1.30
  -2  11   3   15.60    1.20
   2 -11   3   17.30    1.30
   2 -11  -3   20.30    1.30
  -2  11  -3   18.20    1.40
   2  11   3   15.10    1.20
   2 -11  -3   19.30    1.30
  -2  11  -3   16.10    1.20
  -2  11  -3   19.60    1.50
   2 -11  -3   16.70    1.30
   2  11   3   21.00    1.30
  -2  11  -3   18.60    1.60
   2  11   3   21.20    1.50
   2  11   3   19.90    1.40
   2  11   3   18.40    1.40
  -2  11  -3   19.30    1.30
  -3  11   3   11.00    0.90
  -3  11   3   13.10    1.00
   3 -11   3   10.50    0.80
  -3  11   3   12.30    0.90
   3 -11   3   12.00    1.00
   3  11   3   11.60    0.90
   3  11   3    9.90    1.00
  -3  11  -3   11.90    1.00
   3  11   3    8.40    0.90
   3  11   3   12.10    1.00
   3 -11  -3   12.00    0.90
  -3  11  -3   12.80    1.00
  -3  11  -3   11.80    1.00
   3 -11  -3   11.80    0.80
  -3  11  -3   10.80    0.80
   0   0  -4  155.08    7.90
   0   0   4  150.98    9.10
   0   0  -4  154.48    8.60
   0   0  -4  139.69    7.40
   0   0  -4  142.99    9.10
   0   0   4  143.19    8.60
   0   0   4  152.38    7.40
  -1   0   4  536.65   25.90
   1   0   4  593.24   27.20
   1   0  -4  498.85   25.90
   1   0  -4  561.14   27.20
   1   0   4  548.95   27.50
  -1   0  -4  452.35   25.80
  -1   0   4  492.65   27.30
  -1   0  -4  549.65   26.50
   1   0   4  560.94   26.70
   1   0  -4  547.15   27.40
  -1   0  -4  553.14   25.90
   1   0  -4  482.55   25.60
  -2   0   4   25.80    2.90
   2   0   4   26.30    2.40
  -2   0   4   22.20    1.60
   2   0   4   26.00    2.90
  -2   0  -4   24.20    2.10
   2   0  -4   23.40    2.70
  -2   0   4   24.40    2.10
   2   0  -4   25.20    2.50
   2   0   4   21.50    2.50
  -2   0   4   27.30    2.70
  -2   0  -4   23.10    2.30
  -2   0  -4   25.30    3.10
  -3   0  -4  349.87   19.50
  -3   0   4  377.96   18.10
   3   0   4  342.37   18.70
  -3   0   4  297.37   16.60
   3   0   4  359.96   18.20
   3   0   4  351.46   19.20
  -3   0   4  315.37   18.90
  -3   0  -4  305.07   18.00
   3   0  -4  333.27   17.40
  -3   0  -4  356.56   18.00
   3   0  -4  362.56   19.10
   4   0  -4   25.20    3.10
  -4   0  -4   21.50    1.80
  -4   0  -4   23.20    3.30
  -4   0   4   22.50    3.20
   4   0   4   25.50    2.80
   4   0  -4   26.20    3.60
  -4   0  -4   25.10    2.90
  -4   0   4   24.90    2.80
  -4   0  -4   23.30    2.70
   4   0   4   24.80    3.50
   4   0   4   24.50    3.20
  -4   0   4   25.70    1.80
   5   0  -4   14.00    2.80
   5   0   4   15.60    2.90
   5   0   4   15.50    3.30
  -5   0   4   15.70    1.20
   5   0  -4   14.80    3.30
  -5   0   4   13.20    3.10
   5   0  -4   15.70    1.50
  -5   0   4   14.20    2.50
  -5   0  -4   15.00    2.50
  -5   0  -4   16.50    1.30
  -5   0  -4   19.20    2.70
   5   0   4   13.30    2.60
  -5   0   4   17.10    1.60
  -5   0  -4   13.70    1.50
  -6   0   4   10.50    1.20
  -6   0   4   11.10    3.00
  -6   0  -4   17.10    3.00
  -6   0  -4   10.90    2.70
   6   0  -4   16.10    1.90
   6   0  -4   13.80    1.50
   6   0  -4   10.90    1.30
   6   0  -4   12.90    1.50
  -6   0   4   13.30    1.60
   6   0   4   12.90    1.50
  -6   0   4   11.20    3.50
   6   0   4   14.20    3.30
   6   0  -4    9.80    2.50
  -6   0  -4   14.00    1.10
  -6   0  -4   11.60    1.20
  -6   0  -4   12.70    1.30
  -6   0   4   14.80    1.30
   6   0   4    8.90    2.80
   6   0  -4   11.00    1.40
  -6   0  -4   13.10    1.30
  -7   0   4   34.00    2.10
   7   0  -4   32.00    2.40
  -7   0   4   33.90    2.70
   7   0  -4   30.90    2.30
  -7   0   4   34.30    2.30
   7   0  -4   30.40    2.40
   7   0   4   32.40    2.30
  -7   0  -4   32.40    2.00
  -7   0   4   30.90    2.50
   7   0  -4   35.20    2.60
   7   0   4   30.90    2.40
   7   0  -4   34.70    2.70
  -7   0  -4   31.70    2.20
  -7   0  -4   29.80    2.10
   7   0   4   33.70    4.70
   7   0   4   32.80    2.50
   7   0  -4   31.20    2.20
  -7   0  -4   25.00    3.90
   7   0  -4   29.60    2.40
   7   0   4   30.50    2.30
   8   0   4  263.87   13.20
   8   0  -4  264.97   13.60
  -8   0  -4  260.87   12.90
  -8   0   4  255.97   12.70
   8   0  -4  250.97   12.90
  -8   0   4  258.97   12.90
   8   0  -4  271.07   13.20
   8   0  -4  258.37   13.00
  -8   0   4  247.58   13.30
  -8   0  -4  244.18   12.70
   8   0   4  252.47   13.00
   8   0   4  252.77   13.00
  -8   0   4  253.67   13.20
   8   0  -4  268.17   13.10
   8   0   4  246.68   12.90
   8   0  -4  252.07   13.00
  -8   0  -4  251.97   12.50
   9   0  -4  309.97   14.70
   9   0   4  272.37   14.00
  -9   0   4  298.67   14.40
  -9   0   4  277.17   13.80
   9   0  -4  291.37   14.30
  -9   0  -4  295.17   14.30
  -9   0   4  283.17   14.00
   9   0  -4  261.07   14.20
   9   0   4  266.47   14.20
   9   0   4  279.07   14.10
  -9   0  -4  257.77   14.00
   9   0  -4  300.07   14.20
  10   0  -4    4.10    0.90
  10   0  -4    4.10    0.80
  10   0   4    3.10    0.80
 -10   0   4    3.30    0.50
 -10   0   4    4.30    0.80
  10   0  -4    3.30    0.80
 -10   0   4    3.80    0.80
 -10   0  -4    4.30    0.70
 -10   0  -4    2.70    0.60
   0   1  -4 1763.02   82.49
   0  -1  -4 1720.43   81.49
   0   1   4 1500.95   81.99
   0   1  -4 1745.13   81.39
   0   1   4 1723.03   81.49
   0  -1   4 1778.82   82.79
   0   1   4 1683.73   82.69
   0  -1  -4 1632.64   83.09
   0  -1   4 1792.32   82.39
   0  -1  -4 1672.93   81.79
   0   1  -4 1615.84   82.89
  -1  -1  -4   73.39    4.70
  -1   1   4   76.69    4.90
   1   1  -4   74.69    3.90
   1   1  -4   67.59    5.20
   1   1  -4   66.39    5.20
   1  -1   4   67.59    5.00
  -1   1   4   80.49    4.60
  -1   1   4   68.49    5.30
  -1  -1  -4   76.59    4.50
   1  -1   4   75.99    5.10
  -1  -1   4   77.29    5.50
   1  -1  -4   74.99    4.20
   1   1   4   74.29    5.10
  -1   1  -4   67.89    3.70
   1  -1  -4   76.49    5.60
  -1  -1   4   78.19    3.90
  -1  -1   4   63.79    4.90
   1  -1  -4   81.99    5.10
   1   1   4   62.59    4.30
  -1   1  -4   72.19    3.70
  -1  -1   4   69.09    3.90
  -1   1  -4   82.89    4.80
  -1   1  -4   74.99    5.80
   1   1   4   78.49    4.40
   1   1   4   83.49    5.70
   2  -1   4   13.70    1.70
   2  -1   4   15.90    1.30
   2  -1   4   24.00    2.60
  -2  -1  -4   19.00    2.00
  -2   1   4   20.90    2.50
  -2  -1  -4   16.40    2.10
   2   1  -4   19.50    2.40
  -2  -1  -4   19.90    2.70
   2  -1   4   20.50    2.40
  -2   1   4   20.50    2.10
   2   1  -4   16.30    2.30
  -2   1   4   19.40    2.20
   2   1  -4   21.70    2.20
   2  -1   4   20.00    2.30
  -2  -1   4   18.10    2.60
  -2   1  -4   19.10    2.70
   2   1   4   22.00    2.70
  -2   1  -4   18.40    2.00
  -2  -1   4   17.80    1.70
   2  -1  -4   18.00    1.30
  -2   1  -4   20.10    1.70
   2   1   4   18.40    2.30
   2   1   4   22.70    1.80
   2  -1  -4   19.30    2.40
   2   1   4   15.40    1.60
   2  -1  -4   16.90    2.20
  -3  -1  -4  773.52   44.40
  -3  -1  -4  842.12   43.10
   3  -1   4  971.30   45.30
  -3   1   4  860.11   44.60
  -3  -1  -4  907.61   44.60
   3  -1   4  918.91   45.10
   3   1  -4  955.60   45.80
   3  -1   4  939.71   45.40
  -3   1   4  928.91   45.50
  -3   1   4  844.72   43.20
   3   1  -4  902.01   45.10
   3  -1   4  798.92   43.10
  -3  -1  -4  895.01   46.00
  -3   1   4  907.51   44.70
   3   1   4  941.61   44.00
   3  -1  -4  934.01   44.60
  -3  -1   4  987.20   46.10
   3   1   4  928.11   46.00
  -3  -1   4  852.91   43.00
  -3  -1   4  954.40   44.40
  -3   1  -4  786.72   45.80
  -3   1  -4  868.31   44.20
   3  -1  -4  934.21   45.60
  -4  -1  -4  121.99    8.20
  -4   1   4  125.29    8.30
   4   1  -4  121.49    6.90
  -4  -1  -4  119.49    9.00
   4  -1   4  134.09    8.70
  -4  -1  -4  123.09    6.60
   4   1  -4  149.59    8.90
  -4   1   4  122.19    8.70
   4  -1   4  117.89    8.50
  -4   1   4  126.19    6.60
   4   1  -4  114.69    8.90
  -4  -1  -4  124.99    8.30
   4  -1   4  129.59    8.60
  -4  -1   4  123.49    9.10
  -4  -1   4  112.59    7.90
  -4   1  -4  121.59    8.00
   4  -1  -4  132.19    9.20
  -4   1  -4  128.89    8.20
   4   1   4  133.09    9.40
   4  -1  -4  129.99    8.10
   4   1   4  114.69    8.40
  -4  -1   4  121.39    6.50
  -4   1  -4  119.39    9.10
  -5   1   4   37.40    2.60
  -5   1   4   37.30    4.60
  -5  -1  -4   37.40    2.60
   5   1  -4   41.20    4.50
  -5  -1  -4   35.00    4.10
   5   1  -4   37.10    2.60
  -5  -1  -4   41.90    2.40
  -5   1   4   35.30    4.20
   5  -1   4   33.00    2.50
   5  -1   4   35.30    4.50
   5   1  -4   35.70    4.80
  -5   1   4   38.60    2.40
   5  -1   4   34.00    4.30
  -5  -1  -4   38.30    4.20
   5  -1   4   40.30    4.30
  -5  -1   4   38.00    2.50
  -5   1  -4   41.30    4.20
   5  -1  -4   37.80    3.90
  -5  -1   4   36.50    4.70
  -5   1  -4   32.80    4.60
   5  -1  -4   40.60    5.00
   5  -1  -4   36.40    2.70
   5   1   4   38.70    4.60
  -5  -1   4   36.50    2.30
  -5  -1   4   33.80    3.90
  -5   1  -4   39.20    4.00
   5   1   4   37.10    5.00
  -6  -1  -4   21.50    1.90
   6   1  -4   22.80    1.90
   6   1  -4   23.40    3.60
   6   1  -4   24.90    2.20
  -6   1   4   22.10    2.10
   6   1  -4   21.70    1.80
  -6  -1  -4   22.40    1.70
  -6  -1  -4   22.90    3.40
   6   1  -4   20.10    1.70
   6   1  -4   21.10    1.70
  -6   1   4   21.80    1.60
   6  -1   4   19.70    1.80
  -6  -1  -4   21.40    1.60
   6  -1   4   19.50    2.00
  -6   1   4   26.70    1.80
   6  -1   4   22.50    1.90
   6   1  -4   23.60    1.90
  -6  -1  -4   20.10    1.60
   6  -1   4   24.50    3.70
   6   1  -4   21.40    1.80
  -6   1   4   22.00    2.00
   6   1  -4   22.10    1.90
   6  -1  -4   24.10    2.00
  -6   1  -4   22.80    1.70
   6  -1  -4   21.80    1.80
  -6   1  -4   22.30    1.70
  -6  -1   4   21.00    1.70
  -6  -1   4   23.70    2.00
   6   1   4   25.40    3.90
   6   1   4   22.10    1.90
   6  -1  -4   20.70    1.80
   6   1   4   20.10    1.60
   6  -1  -4   25.40    2.30
   6   1   4   20.20    1.90
  -6   1  -4   17.90    3.20
  -6   1  -4   29.70    3.70
  -6  -1   4   17.60    3.50
  -6   1  -4   19.50    1.40
  -7  -1  -4   57.69    6.40
  -7   1   4   73.89    4.10
  -7  -1  -4   70.09    4.00
   7   1  -4   68.79    4.20
  -7   1   4   65.49    4.50
   7   1  -4   68.59    4.20
  -7   1   4   64.79    3.80
  -7   1   4   73.39    4.40
   7   1  -4   76.59    4.30
   7  -1   4   70.59    4.20
   7   1  -4   67.49    4.20
   7   1  -4   76.49    4.30
   7   1  -4   65.69    4.20
  -7  -1  -4   75.29    3.80
   7   1  -4   72.69    4.20
   7   1  -4   72.79    4.60
   7  -1   4   63.49    4.10
  -7  -1  -4   74.39    4.00
   7  -1   4   57.29    6.30
   7   1  -4   62.79    6.60
   7   1   4   72.69    7.20
  -7  -1   4   67.59    3.80
  -7   1  -4   59.09    6.10
   7  -1  -4   70.19    4.20
   7   1   4   71.19    4.20
   7  -1  -4   73.99    4.30
   7  -1  -4   67.69    4.20
  -7   1  -4   76.09    4.10
  -7   1  -4   69.59    3.90
   7   1   4   77.69    4.40
   7  -1  -4   70.99    4.10
  -7  -1   4   69.39    4.40
  -7  -1   4   68.99    4.00
   7  -1  -4   72.79    4.60
   7   1   4   67.69    4.10
   8   1  -4    4.40    1.10
  -8   1   4    4.80    0.80
   8   1  -4    6.10    1.00
   8  -1   4    4.50    0.90
  -8  -1  -4    4.50    0.70
  -8  -1  -4    4.50    0.80
   8   1  -4    4.30    1.10
   8   1  -4    5.60    1.10
   8  -1   4    3.80    1.10
  -8  -1  -4    4.00    0.90
  -8  -1  -4    4.40    0.80
   8   1  -4    3.90    0.90
   8   1  -4    5.70    1.20
  -8   1   4    5.00    1.20
  -8   1   4    4.70    0.90
   8   1   4    5.90    1.00
   8  -1  -4    5.70    1.10
   8   1   4    5.10    1.10
   8  -1  -4    3.60    1.00
  -8   1  -4    3.90    0.80
  -8   1  -4    1.80    0.90
   8   1   4    5.20    1.10
  -8   1  -4    5.10    0.90
  -8  -1   4    4.10    1.00
  -8  -1   4    4.90    0.80
  -8  -1   4    4.60    0.90
   8  -1  -4    3.70    1.20
   8  -1  -4    5.80    1.00
  -8  -1   4    5.40    1.10
   8  -1  -4    3.10    1.00
   9   1  -4   94.39    5.30
  -9   1   4  102.09    5.50
   9  -1   4   97.29    5.30
   9   1  -4   96.89    5.60
   9   1  -4   99.29    5.30
   9   1  -4   92.09    5.20
  -9  -1  -4   94.79    4.80
  -9  -1  -4   86.39    5.10
   9  -1   4   96.89    5.20
  -9   1   4  100.59    4.90
   9   1  -4   96.19    5.30
   9   1  -4   97.29    5.30
  -9  -1   4  104.29    5.50
   9   1   4   95.49    5.20
  -9  -1   4   86.79    5.60
   9  -1  -4   93.99    5.20
  -9   1  -4   80.49    5.00
   9  -1  -4   85.69    5.20
   9  -1  -4  100.29    5.80
   9   1   4  100.49    5.30
  -9  -1   4   87.19    4.90
   9  -1  -4   94.09    5.20
  -9   1  -4   82.59    5.10
   9   1   4   89.79    5.40
  -9  -1   4   99.09    5.20
 -10   1   4   45.30    2.80
  10  -1   4   39.40    2.60
 -10  -1  -4   45.90    2.70
  10   1  -4   45.70    2.80
 -10  -1  -4   43.90    2.70
  10   1  -4   47.30    2.80
  10   1  -4   47.90    2.80
  10  -1   4   46.60    2.80
 -10   1   4   49.99    3.00
 -10   1  -4   47.00    2.70
  10  -1  -4   42.40    3.10
 -10  -1   4   44.60    2.50
  10   1   4   41.50    2.70
  10  -1  -4   49.20    2.80
 -10  -1   4   51.49    2.90
 -10  -1   4   45.70    2.80
  10   1   4   47.00    2.80
   0  -2   4  248.48   13.70
   0   2  -4  271.07   14.40
   0   2   4  240.98   13.00
   0  -2  -4  233.98   12.80
   0  -2   4  258.17   13.50
   0   2  -4  214.38   13.50
   0  -2  -4  238.18   14.30
   0   2  -4  233.18   12.60
   0  -2  -4  226.38   12.50
   0   2   4  248.78   13.80
   0   2   4  257.67   13.20
  -1  -2  -4  496.65   24.60
  -1   2   4  378.36   22.30
  -1   2   4  487.65   22.80
  -1  -2  -4  392.56   21.50
   1   2  -4  497.25   23.70
   1  -2   4  468.65   23.20
   1  -2   4  442.26   23.30
   1   2  -4  424.36   21.80
   1  -2   4  402.36   21.40
  -1  -2  -4  456.35   22.70
   1   2  -4  465.75   23.70
  -1   2   4  396.66   23.10
   1  -2   4  484.15   23.20
   1   2   4  413.76   21.40
  -1   2  -4  487.25   24.40
  -1  -2   4  514.35   23.90
   1  -2  -4  462.45   22.80
  -1  -2   4  412.46   21.50
  -1   2  -4  404.76   21.40
   1   2   4  401.76   23.40
  -1  -2   4  398.76   21.50
   1   2   4  380.36   21.40
   1   2   4  459.85   22.90
  -1  -2   4  480.55   23.30
   1   2   4  441.26   22.70
   1  -2  -4  449.06   23.90
  -1   2  -4  474.85   22.60
   1  -2  -4  448.26   22.20
   2  -2   4  197.48   10.80
  -2   2   4  178.18    9.60
   2   2  -4  162.88   10.60
  -2  -2  -4  194.68   12.00
   2   2  -4  182.48   10.70
  -2  -2  -4  172.48   10.50
  -2   2   4  184.38   10.50
  -2   2   4  154.28    9.90
   2  -2   4  179.08    9.10
  -2  -2  -4  184.38   10.60
  -2   2   4  185.48   10.90
   2  -2   4  189.58   10.70
  -2  -2  -4  173.58    9.10
   2   2  -4  186.38   11.20
   2  -2   4  194.18   11.20
  -2  -2   4  187.18    9.80
  -2  -2   4  187.38   11.40
  -2   2  -4  175.88    9.60
   2  -2  -4  181.78   11.20
  -2   2  -4  185.18   11.80
   2  -2  -4  187.28   10.80
   2   2   4  188.98   11.60
   2   2   4  179.18   10.80
  -2   2  -4  181.88   10.40
  -3  -2  -4  187.18   11.40
   3  -2   4  210.18   12.30
  -3   2   4  202.68   11.80
  -3   2   4  176.48    9.90
  -3  -2  -4  208.28   11.70
  -3  -2  -4  194.28    9.90
  -3   2   4  193.08   10.90
  -3   2   4  204.48   11.70
   3  -2   4  194.48    9.90
   3  -2   4  194.28   11.50
   3  -2   4  214.18   11.80
   3   2  -4  193.48   11.80
   3   2  -4  203.38   12.30
  -3  -2  -4  198.78   12.70
   3  -2  -4  209.28   12.20
  -3  -2   4  171.18   10.90
  -3   2  -4  205.78   13.00
   3  -2  -4  188.18   11.60
  -3  -2   4  213.18   12.70
  -3   2  -4  184.38   10.80
  -3  -2   4  171.98    9.60
  -3   2  -4  191.18   11.40
   3   2   4  190.28   11.80
   3   2   4  211.58   12.80
  -4  -2  -4  114.19    7.90
   4  -2   4  119.09    7.90
  -4  -2  -4  113.39    6.00
  -4  -2  -4  107.29    5.80
  -4   2   4  119.09    8.00
   4   2  -4  109.99    6.10
   4  -2   4  109.69    8.30
  -4   2   4  115.79    7.30
  -4   2   4  102.59    6.00
  -4   2   4   98.79    5.80
   4   2  -4  112.79    8.10
  -4   2   4  116.69    7.90
   4   2  -4  120.19    8.70
   4  -2   4  111.59    6.00
   4  -2   4  101.99    5.70
  -4  -2  -4  114.59    7.80
  -4  -2   4  127.09    9.10
   4  -2  -4  107.89    6.20
  -4   2  -4  100.09    7.20
   4   2   4  116.79    9.00
  -4   2  -4  121.79    7.90
   4   2   4  116.09    8.30
  -4  -2   4  103.59    7.50
  -4   2  -4  119.59    9.10
   4  -2  -4  121.09    8.70
  -4  -2   4  116.99    5.80
   5  -2   4  263.77   16.10
   5  -2   4  275.27   17.00
   5   2  -4  292.97   17.00
  -5  -2  -4  273.87   13.60
  -5  -2  -4  269.07   16.50
   5   2  -4  278.17   14.10
  -5   2   4  272.37   13.60
   5  -2   4  277.47   14.10
   5  -2   4  258.97   13.50
   5   2  -4  263.67   17.00
  -5   2   4  261.87   16.40
  -5  -2  -4  296.47   16.40
  -5  -2  -4  304.67   14.00
  -5   2   4  274.17   13.90
  -5   2  -4  252.77   13.80
   5   2   4  292.97   17.30
  -5  -2   4  266.17   13.50
  -5  -2   4  256.67   16.00
  -5   2  -4  255.57   15.80
  -5   2  -4  281.67   17.70
  -5  -2   4  297.67   18.00
   5  -2  -4  256.87   14.10
   5   2   4  283.17   18.00
  -5   2  -4  294.97   16.30
  -5  -2   4  292.07   13.80
   5  -2  -4  277.67   17.40
  -6  -2  -4   18.90    1.50
  -6  -2  -4   20.50    3.70
   6  -2   4   19.00    1.90
   6   2  -4   21.20    1.90
   6   2  -4   17.20    1.70
   6   2  -4   19.10    1.80
   6  -2   4   17.50    1.80
  -6   2   4   17.70    1.40
   6   2  -4   19.00    1.80
  -6  -2  -4   22.00    1.60
   6   2  -4   21.50    1.90
  -6  -2  -4   19.60    1.40
   6  -2   4   14.00    3.10
   6   2  -4   19.10    1.70
   6   2  -4   20.00    3.80
  -6  -2  -4   21.40    1.90
  -6   2   4   18.40    1.60
   6  -2   4   20.00    1.70
  -6   2   4   18.10    1.90
   6   2  -4   22.20    1.80
   6  -2  -4   20.50    1.90
   6   2   4   19.20    1.90
   6   2   4   16.10    3.60
  -6  -2   4   18.80    1.80
   6  -2  -4   18.70    1.70
   6   2   4   18.90    1.70
  -6  -2   4   20.10    1.50
   6   2   4   19.00    1.70
   6   2   4   16.60    1.60
  -6   2  -4   20.00    1.50
   6  -2  -4   20.40    1.80
   6  -2  -4   17.50    1.70
   6   2   4   19.90    1.50
  -6   2  -4   18.80    1.50
  -6   2  -4   15.30    3.30
   7  -2   4  168.38    9.20
   7   2  -4  172.68    9.30
   7   2  -4  165.48    9.00
  -7  -2  -4  174.48    9.20
   7   2  -4  168.28    9.00
  -7  -2  -4  184.38    8.80
   7  -2   4  164.98    9.00
   7   2  -4  164.48    8.90
   7   2  -4  171.58    8.90
   7   2  -4  167.38    8.90
   7  -2   4  171.58    8.90
  -7  -2  -4  171.48    8.50
  -7  -2  -4  162.88    8.60
  -7   2   4  168.78    9.10
   7   2  -4  165.88    8.90
  -7   2   4  171.98    8.50
   7  -2  -4  174.28    9.40
  -7   2  -4  172.58    8.70
  -7   2  -4  172.28    8.70
   7  -2  -4  163.58    8.90
   7   2   4  170.58    8.70
  -7  -2   4  173.28    8.70
  -7  -2   4  160.18    9.10
   7   2   4  163.28    8.90
   7   2   4  159.28    8.90
   7   2   4  163.68    8.90
   7   2   4  170.98    9.00
   7  -2  -4  171.78    9.00
   7  -2  -4  174.08    9.00
   8   2  -4   10.30    1.40
  -8  -2  -4    7.40    1.00
   8   2  -4   11.50    1.60
   8  -2   4    7.70    1.40
   8   2  -4   11.10    1.40
   8   2  -4   11.70    1.50
   8   2  -4   10.50    1.40
   8  -2   4   13.50    1.50
  -8   2   4   12.10    1.50
  -8  -2  -4   10.30    1.20
   8   2  -4   12.10    1.40
  -8   2   4   10.30    1.40
  -8  -2  -4   12.70    1.20
   8  -2   4    9.80    1.30
   8   2  -4   11.60    1.40
  -8   2   4    9.50    1.20
  -8   2  -4    9.20    1.20
   8   2   4   11.20    1.30
   8   2   4   11.00    1.40
  -8   2  -4    9.40    1.10
  -8  -2   4    9.80    1.00
   8  -2  -4   11.40    1.50
  -8  -2   4   10.70    1.60
   8  -2  -4   10.10    1.60
   8  -2  -4   10.30    1.40
   8   2   4   14.70    1.50
  -8  -2   4   10.90    1.20
   9   2  -4   50.29    3.30
   9  -2   4   56.79    3.40
   9   2  -4   45.50    3.30
   9   2  -4   50.39    3.20
   9   2  -4   54.49    3.30
   9   2  -4   54.29    3.30
   9  -2   4   55.09    3.20
  -9   2   4   52.19    3.40
   9   2  -4   53.59    3.30
  -9  -2  -4   54.89    2.90
  -9  -2  -4   45.50    3.00
  -9   2   4   48.90    3.20
   9  -2  -4   52.39    3.30
   9   2   4   49.00    3.20
  -9   2  -4   43.90    3.00
  -9  -2   4   55.49    3.00
   9  -2  -4   50.49    3.10
  -9  -2   4   54.79    3.40
  -9  -2   4   47.80    3.40
   9  -2  -4   50.79    3.60
  -9  -2   4   49.30    3.10
   9   2   4   57.19    3.40
   9   2   4   54.39    3.30
  10  -2   4  117.79    6.20
  10   2  -4  120.89    6.30
  10   2  -4  115.89    6.20
 -10  -2  -4  124.39    6.20
  10   2  -4  117.39    6.20
 -10   2   4  114.59    6.20
 -10  -2  -4  115.49    6.20
  10  -2   4  115.69    6.20
  10   2  -4  117.99    6.20
 -10   2   4  126.89    6.40
  10   2   4  125.39    6.30
 -10  -2   4  119.29    6.00
  10   2   4  122.29    6.30
 -10  -2   4  110.39    6.10
  10  -2  -4  119.09    6.50
  10  -2  -4  128.49    6.30
 -10  -2   4  119.79    6.30
 -10   2  -4  123.49    6.20
   0   3   4    0.80    1.00
   0  -3   4    0.80    0.40
   0  -3  -4    1.20    0.50
   0  -3  -4    0.80    1.00
   0   3   4   -0.10    0.70
   0   3  -4    0.50    0.70
   0   3   4    0.30    0.60
   0  -3  -4    0.30    0.70
   0  -3   4    0.50    0.70
   0  -3  -4    2.60    0.50
   0   3  -4    1.60    1.30
   0  -3   4    0.80    1.00
   0  -3   4    1.40    0.80
   1  -3   4 1485.25   77.89
   1   3  -4 1518.65   78.79
   1  -3   4 1671.23   80.59
  -1   3   4 1647.04   79.99
  -1  -3  -4 1642.74   79.69
   1   3  -4 1786.92   81.19
  -1  -3  -4 1614.84   78.09
   1   3  -4 1656.43   80.49
  -1   3   4 1553.84   78.69
   1  -3   4 1652.83   79.79
  -1  -3  -4 1772.92   81.89
   1  -3   4 1634.24   79.69
  -1   3   4 1697.73   79.99
  -1   3  -4 1691.23   81.59
  -1  -3   4 1683.33   80.09
   1  -3  -4 1586.64   79.29
   1   3   4 1609.14   79.49
   1  -3  -4 1667.33   81.39
  -1  -3   4 1549.24   80.29
   1   3   4 1615.34   79.79
  -1   3  -4 1606.94   79.39
  -1   3  -4 1530.35   78.39
  -1  -3   4 1519.25   78.49
   1   3   4 1782.82   80.79
   2   3  -4 1201.98   57.99
  -2   3   4 1126.79   57.09
  -2  -3  -4 1165.18   55.29
   2  -3   4 1121.09   56.59
  -2  -3  -4 1219.18   57.49
  -2  -3  -4 1078.09   56.99
   2  -3   4 1072.59   55.29
  -2   3   4 1188.38   57.39
   2   3  -4 1205.18   57.59
  -2   3   4 1141.19   56.39
  -2  -3  -4 1256.37   59.29
   2   3  -4 1178.58   57.69
   2  -3   4 1109.29   56.99
   2  -3   4 1175.88   58.09
   2  -3  -4 1092.39   57.19
  -2  -3   4 1194.98   58.19
  -2  -3   4 1098.29   56.19
   2   3   4 1198.18   58.49
   2  -3  -4 1210.08   58.59
  -2   3  -4 1081.59   58.79
   2   3   4 1151.78   57.19
  -2   3  -4 1170.38   56.99
  -2   3  -4 1084.79   55.99
  -3   3   4    5.30    1.40
   3   3  -4    5.50    1.90
  -3  -3  -4    7.80    2.00
  -3  -3  -4    4.80    1.50
  -3   3   4    5.60    1.70
  -3  -3  -4    5.80    0.80
   3   3  -4    5.30    1.60
  -3  -3  -4    7.40    2.20
   3  -3   4    7.00    1.60
   3  -3   4    9.10    2.40
   3  -3   4    6.40    1.00
   3   3   4    6.40    1.80
  -3  -3   4    5.40    1.40
   3  -3  -4    5.40    1.80
  -3   3  -4    7.60    2.60
  -3  -3   4    6.10    2.00
   3  -3  -4    6.90    2.00
  -3   3  -4    6.80    1.80
  -3   3  -4    4.90    1.30
   3   3   4    5.60    1.90
  -4   3   4  115.69    8.30
   4   3  -4  105.69    6.00
   4  -3   4  112.89    5.90
  -4  -3  -4  103.19    8.00
  -4  -3  -4  101.59    8.60
   4   3  -4  111.79    8.60
  -4  -3  -4  114.09    5.90
  -4  -3  -4  104.99    5.60
   4  -3   4   91.99    7.20
   4  -3   4  104.99    8.60
   4   3  -4  118.99    8.50
   4  -3   4  109.49    5.70
  -4  -3  -4  118.19    8.10
  -4   3  -4  107.09    9.20
  -4   3  -4  106.59    6.20
  -4  -3   4  109.39    5.50
  -4   3  -4   88.79    5.80
  -4  -3   4  104.59    7.50
  -4   3  -4  115.59    7.80
   4   3   4  107.09    9.00
   4  -3  -4  110.29    6.10
  -4  -3   4  101.99    8.80
   4  -3  -4  112.29    8.50
   4   3   4  118.39    8.50
   5   3  -4   14.80    1.60
  -5  -3  -4   12.80    1.20
   5   3  -4   11.60    1.50
   5  -3   4   11.60    1.20
   5   3  -4   10.00    2.70
  -5   3   4    9.00    2.80
   5   3  -4   13.90    1.60
  -5  -3  -4   13.30    2.80
  -5  -3  -4   13.30    1.40
   5  -3   4   11.00    1.50
   5  -3   4    9.90    3.10
   5  -3   4   13.70    1.60
   5   3  -4    9.80    2.90
  -5  -3  -4   10.00    2.90
   5  -3  -4   14.20    3.40
  -5   3  -4    9.50    2.90
   5   3   4   12.30    3.10
   5   3   4   12.30    1.50
  -5  -3   4   11.90    1.20
  -5   3  -4   11.70    1.40
  -5   3  -4   12.20    2.70
   5  -3  -4   11.20    1.40
   5   3   4   14.10    3.70
  -6  -3  -4   82.19    4.50
   6   3  -4   78.99    4.80
   6   3  -4   85.69    5.10
   6   3  -4   86.49    5.00
   6   3  -4   70.69    7.60
   6  -3   4   89.19    5.50
   6  -3   4   84.69    5.00
   6   3  -4   83.39    5.20
   6   3  -4   86.99    5.00
  -6  -3  -4   93.29    5.20
   6  -3   4   85.99    4.90
  -6   3   4   84.19    5.10
  -6  -3  -4   89.79    4.80
   6   3  -4   83.69    4.90
  -6   3   4   89.39    5.10
  -6  -3  -4   87.79    7.40
  -6   3   4   78.99    4.40
   6   3  -4   91.19    5.00
  -6   3  -4   94.99    7.50
   6  -3  -4   88.09    4.90
   6   3   4   80.19    4.70
  -6   3  -4   86.49    4.70
   6   3   4   80.49    5.00
   6   3   4   80.69    7.70
   6   3   4   89.09    5.00
  -6   3  -4   83.19    4.70
   6   3   4   93.19    5.00
   6  -3  -4   85.29    4.90
   6   3   4   81.19    4.90
   6  -3  -4   95.19    5.40
  -6  -3   4   84.09    4.60
   6   3   4   85.69    5.00
  -6  -3   4   89.89    4.90
  -7  -3  -4   85.09    5.30
  -7   3   4   88.59    5.10
   7   3  -4   84.29    5.00
   7   3  -4   85.39    5.00
   7  -3   4   83.29    5.00
   7  -3   4   89.09    5.00
  -7  -3  -4   83.89    4.80
  -7  -3  -4   82.59    4.70
   7   3  -4   88.49    5.20
  -7  -3  -4   82.09    4.60
   7   3  -4   87.69    4.90
   7  -3   4   85.99    5.40
   7   3  -4   89.79    5.10
   7   3  -4   85.89    5.30
  -7   3   4   86.09    5.10
   7   3  -4   88.49    5.00
   7   3   4   86.59    5.00
   7   3   4   83.99    5.10
  -7  -3   4   86.69    5.10
   7   3   4   87.29    4.80
  -7   3  -4   85.29    4.80
   7   3   4   86.29    4.90
   7  -3  -4   87.39    5.00
  -7  -3   4   82.69    4.70
   7  -3  -4   90.89    5.40
  -7   3  -4   87.59    4.70
   7   3   4   85.09    5.10
   7   3   4   88.59    5.00
   7  -3  -4   89.29    5.10
   8   3  -4  253.17   12.70
   8  -3   4  236.78   12.90
   8  -3   4  243.88   12.60
  -8  -3  -4  260.47   12.50
  -8  -3  -4  235.28   12.90
  -8  -3  -4  252.87   12.20
  -8  -3  -4  214.48   12.30
   8   3  -4  252.97   12.80
   8   3  -4  263.97   12.60
   8   3  -4  252.97   12.70
   8   3  -4  236.28   12.60
   8   3  -4  238.78   12.90
  -8   3   4  256.17   12.90
  -8   3   4  253.27   12.70
   8  -3   4  266.37   12.70
   8   3  -4  238.98   12.70
   8   3   4  249.08   12.40
   8   3   4  245.58   12.70
  -8   3  -4  246.78   12.40
  -8  -3   4  264.57   12.50
   8   3   4  262.17   12.60
   8  -3  -4  253.77   12.60
  -8  -3   4  229.58   12.20
   8  -3  -4  256.97   12.60
  -8   3  -4  241.68   12.40
   8  -3  -4  237.88   13.10
   8   3   4  258.77   12.70
   8   3   4  244.98   12.60
   8   3   4  250.07   12.80
  -8  -3   4  232.68   12.80
   9   3  -4   11.80    1.50
  -9  -3  -4   11.50    1.30
   9   3  -4   14.30    1.70
  -9   3   4   11.70    1.60
   9  -3   4   12.70    1.30
  -9   3   4   12.60    1.40
   9   3  -4   12.80    1.60
   9   3  -4   10.40    1.30
  -9  -3  -4   10.60    1.00
   9   3  -4   12.40    1.30
   9  -3   4   11.10    1.60
  -9  -3  -4   12.50    1.20
   9  -3   4   11.80    1.30
   9   3   4   12.30    1.30
   9   3   4   13.00    1.40
   9  -3  -4   13.20    1.30
  -9  -3   4   13.40    1.50
  -9   3  -4   11.60    1.10
   9   3   4   12.10    1.30
  -9  -3   4   12.90    1.40
   9  -3  -4   11.20    1.50
   9   3   4   13.40    1.60
   9  -3  -4   13.70    1.30
  -9  -3   4   13.70    1.40
  -9  -3   4   12.60    1.10
 -10  -3  -4   13.00    0.80
 -10   3   4   12.30    1.20
  10   3  -4   10.50    1.20
 -10  -3  -4   12.80    1.10
  10   3  -4   10.80    1.10
  10   3  -4   11.10    1.00
  10   3  -4   11.70    1.10
  10  -3   4   11.60    1.00
  10  -3   4   10.00    1.10
  10   3  -4   12.90    1.20
 -10  -3   4   13.20    0.90
  10   3   4   11.70    1.10
 -10   3  -4   12.80    1.10
  10   3   4   13.80    1.20
  10  -3  -4   13.10    1.10
  10  -3  -4   12.00    1.10
 -10  -3   4   13.10    1.10
  10  -3  -4   12.70    1.30
 -10  -3   4   11.80    1.00
   0   4   4  496.45   26.30
   0   4   4  524.25   26.40
   0  -4  -4  513.25   28.20
   0  -4   4  504.95   26.80
   0   4  -4  422.56   27.10
   0  -4  -4  503.55   25.90
   0   4   4  429.76   25.40
   0  -4   4  529.65   26.00
   0  -4   4  465.65   25.80
   0  -4  -4  521.85   24.10
   0   4  -4  522.95   25.60
   1   4  -4  600.64   31.20
   1  -4   4  677.43   33.20
   1  -4   4  596.14   29.80
  -1  -4  -4  664.63   34.60
   1   4  -4  562.64   33.00
  -1  -4  -4  645.44   32.10
  -1   4   4  647.44   32.40
  -1   4   4  642.84   32.00
  -1   4   4  641.64   31.70
   1  -4   4  539.05   31.40
  -1  -4  -4  581.04   30.00
   1  -4  -4  625.94   30.10
  -1   4  -4  661.53   31.90
  -1  -4   4  617.44   32.50
   1   4   4  639.94   32.50
  -1  -4   4  592.24   32.00
   1   4   4  619.14   32.70
   1  -4  -4  637.24   34.10
  -1   4  -4  548.45   30.70
  -1  -4   4  656.03   32.90
   1   4   4  601.54   31.30
  -1   4  -4  650.13   34.20
   2   4  -4  420.66   24.10
   2   4  -4  439.96   25.90
  -2   4   4  476.85   25.70
  -2  -4  -4  495.75   25.60
   2  -4   4  490.65   26.40
  -2  -4  -4  481.85   27.40
   2  -4   4  442.06   24.70
  -2   4   4  503.05   24.90
  -2  -4  -4  474.85   23.20
   2  -4   4  460.45   23.20
   2   4  -4  480.45   26.00
   2   4   4  538.75   26.90
   2  -4  -4  445.56   25.10
  -2   4  -4  475.05   27.40
   2   4   4  488.95   25.20
  -2  -4   4  454.55   26.00
   2  -4  -4  507.85   27.40
  -2   4  -4  512.45   25.40
  -2   4  -4  475.05   23.40
   2   4   4  484.35   23.40
  -2   4  -4  445.76   23.50
   2  -4  -4  479.75   23.30
  -2  -4   4  488.95   25.80
   2  -4  -4  474.25   23.10
   3   4  -4   97.39    5.50
  -3  -4  -4   96.39    5.10
  -3  -4  -4  102.99    5.30
  -3   4   4   93.59    7.50
  -3  -4  -4  106.79    7.90
   3  -4   4   94.09    5.10
   3   4  -4  106.19    7.70
  -3  -4  -4   97.89    7.30
  -3  -4  -4   93.09    5.40
  -3  -4  -4   98.99    8.80
   3   4  -4   95.89    7.60
   3  -4   4   98.59    8.10
   3  -4   4  105.99    5.40
   3  -4  -4   93.79    7.50
   3   4   4  103.09    8.40
   3  -4  -4   94.29    5.10
   3  -4  -4   91.19    5.30
   3  -4  -4   85.89    5.30
  -3   4  -4   92.09    5.60
  -3   4  -4   99.39    7.20
  -3   4  -4  101.19    5.50
   3  -4  -4   95.39    8.20
   3   4   4   90.49    7.30
  -3   4  -4   96.99    8.70
  -3  -4   4   92.79    8.00
  -4  -4  -4  407.16   19.00
   4   4  -4  373.06   19.10
   4  -4   4  394.46   18.70
  -4  -4  -4  367.36   22.10
  -4  -4  -4  382.16   18.60
  -4  -4  -4  414.26   21.90
   4   4  -4  347.27   21.80
  -4   4   4  370.16   21.90
  -4  -4  -4  356.36   18.90
   4  -4   4  395.96   19.00
   4   4  -4  423.46   22.30
   4   4   4  392.26   21.90
  -4   4  -4  391.46   23.80
   4  -4  -4  393.06   19.10
  -4   4  -4  389.96   21.50
   4   4   4  337.67   22.70
  -4   4  -4  399.06   19.10
  -4   4  -4  382.96   19.40
  -4  -4   4  357.16   22.70
   4  -4  -4  370.76   22.20
   4  -4  -4  360.56   18.60
   5   4  -4   62.79    3.80
  -5   4   4   61.99    3.90
  -5  -4  -4   59.89    3.80
   5   4  -4   61.19    3.80
  -5   4   4   61.89    3.80
   5  -4   4   55.69    3.60
   5   4  -4   61.39    3.80
   5  -4   4   71.89    4.10
   5   4  -4   64.19    3.80
  -5  -4  -4   63.29    3.60
   5   4  -4   63.29    4.00
   5   4  -4   71.09    6.90
   5  -4   4   67.89    3.70
  -5  -4  -4   59.09    6.00
   5   4  -4   62.39    3.70
  -5   4  -4   57.49    3.90
   5   4   4   57.89    6.10
   5   4   4   64.59    3.60
   5   4   4   61.09    4.00
  -5   4  -4   61.59    6.10
  -5   4  -4   64.89    4.00
  -5   4  -4   61.79    3.60
  -5  -4   4   64.69    3.60
  -5   4  -4   61.19    3.80
   5   4   4   61.19    3.80
   5  -4  -4   69.49    4.10
   5   4   4   63.99    3.90
   5   4   4   61.49    3.80
   5  -4  -4   61.59    3.80
   5   4   4   63.69    3.60
  -5   4  -4   57.39    3.60
  -5   4  -4   68.99    3.70
   5  -4  -4   56.69    3.30
   6   4  -4  694.53   34.60
   6   4  -4  656.73   34.30
  -6  -4  -4  642.04   37.30
  -6   4   4  714.73   34.60
   6  -4   4  648.54   34.10
   6   4  -4  717.23   34.40
   6  -4   4  760.62   34.50
  -6   4   4  712.93   34.50
   6   4  -4  744.43   34.50
   6   4  -4  744.53   34.60
  -6  -4  -4  702.93   34.60
   6   4  -4  777.02   34.50
   6   4  -4  629.84   38.10
   6  -4   4  660.33   34.30
   6  -4   4  725.03   35.00
   6   4  -4  701.23   34.30
  -6  -4  -4  687.83   34.00
  -6  -4  -4  741.83   34.20
  -6   4  -4  725.43   34.20
   6   4   4  703.13   34.50
   6  -4  -4  728.73   34.50
  -6   4  -4  626.74   37.40
   6   4   4  722.63   34.20
  -6  -4   4  750.52   34.30
  -6   4  -4  718.63   34.20
   6  -4  -4  666.13   34.20
   6   4   4  767.72   34.60
   6   4   4  700.03   34.50
   6  -4  -4  741.73   34.90
  -6   4  -4  675.03   34.40
   6   4   4  753.32   34.50
   6  -4  -4  665.33   34.10
   6   4   4  644.14   38.20
   6   4   4  696.83   34.10
  -7  -4  -4   45.50    3.30
   7   4  -4   42.90    3.10
  -7   4   4   45.20    3.10
   7  -4   4   44.60    3.00
  -7  -4  -4   42.80    2.70
   7   4  -4   43.90    3.10
  -7   4   4   46.50    3.10
   7   4  -4   45.90    3.10
   7   4  -4   47.50    3.00
   7   4  -4   45.80    3.10
   7  -4   4   46.30    3.40
   7   4  -4   46.60    3.10
  -7  -4  -4   46.50    2.80
   7   4  -4   42.70    3.00
  -7  -4  -4   39.30    2.80
   7  -4   4   44.40    2.90
   7   4   4   44.70    3.00
   7  -4  -4   45.00    3.20
  -7  -4   4   44.10    2.80
   7   4   4   45.30    2.90
   7   4   4   46.80    2.90
   7  -4  -4   45.90    3.00
   7   4   4   48.00    3.20
  -7   4  -4   45.40    2.80
   7   4   4   44.80    3.10
   7   4   4   44.60    3.30
   7  -4  -4   45.60    3.30
  -7   4  -4   48.90    3.00
  -7  -4   4   47.10    3.10
  -8  -4  -4  149.69    8.80
  -8   4   4  166.58    8.60
   8   4  -4  157.38    8.50
   8  -4   4  166.58    9.00
  -8   4   4  164.98    8.70
   8   4  -4  158.98    8.60
  -8  -4  -4  159.98    8.20
   8  -4   4  153.58    8.60
   8   4  -4  158.88    8.60
  -8  -4  -4  166.88    8.40
   8  -4   4  166.08    8.50
   8   4  -4  160.58    8.40
   8   4  -4  158.68    8.60
   8   4  -4  155.98    8.60
   8  -4  -4  172.38    8.60
   8  -4  -4  168.28    9.00
   8  -4  -4  165.88    8.50
   8   4   4  169.68    8.50
  -8  -4   4  171.88    8.40
   8   4   4  156.58    8.60
  -8   4  -4  162.08    8.40
   8   4   4  163.78    8.70
   8   4   4  145.89    8.30
  -8   4  -4  163.98    8.30
  -8  -4   4  163.78    8.70
   8   4   4  166.68    8.60
   8   4   4  165.18    8.50
   9   4  -4   66.89    3.80
   9   4  -4   63.19    3.70
  -9  -4  -4   61.39    3.30
   9   4  -4   62.99    3.70
  -9   4   4   65.59    3.80
  -9  -4  -4   67.09    3.50
   9  -4   4   56.09    3.80
   9   4  -4   61.09    3.50
  -9   4   4   57.59    3.50
   9   4  -4   60.19    3.60
   9  -4   4   56.69    3.50
   9  -4   4   64.59    3.70
  -9  -4  -4   60.69    3.50
  -9  -4   4   55.89    3.70
  -9  -4   4   65.69    3.50
  -9  -4   4   59.89    3.30
   9   4   4   57.69    3.50
   9  -4  -4   60.69    3.60
   9   4   4   61.49    3.60
   9  -4  -4   59.89    3.50
  -9   4  -4   57.79    3.50
   9  -4  -4   60.09    3.90
   9   4   4   60.89    3.60
   9   4   4   61.39    3.50
   9   4   4   66.89    3.70
 -10  -4  -4   96.49    4.70
  10   4  -4   94.19    5.00
  10  -4   4  100.99    5.00
 -10  -4  -4  100.59    4.90
  10   4  -4  103.59    5.00
  10   4  -4   96.39    5.00
 -10   4   4   92.89    5.00
  10   4  -4   90.49    5.00
  10   4   4   80.19    5.00
 -10   4  -4  103.89    4.90
  10   4   4   96.59    5.00
 -10  -4   4  107.79    4.80
 -10  -4   4   84.59    4.90
  10  -4  -4   91.29    4.90
   0   5  -4  577.14   31.30
   0  -5  -4  583.84   29.00
   0   5   4  520.75   28.70
   0  -5  -4  562.44   26.50
   0   5  -4  519.95   28.30
   0  -5  -4  502.85   26.20
   0  -5  -4  539.05   31.20
   0   5   4  574.64   29.50
   0   5   4  526.25   26.70
   0   5  -4  529.95   26.60
   0  -5   4  507.15   28.30
   0   5  -4  559.94   26.80
   0  -5   4  570.54   29.90
  -1   5   4  181.68   11.00
   1   5  -4  159.18    9.10
  -1  -5  -4  180.68    9.10
   1  -5   4  163.18   11.80
  -1  -5  -4  186.58   11.50
   1   5  -4  173.78   10.60
  -1  -5  -4  170.28   13.20
  -1  -5  -4  173.08    8.80
  -1   5   4  183.48    9.30
   1   5  -4  164.78    9.20
   1   5  -4  186.08   13.00
  -1   5   4  182.28   11.80
   1  -5   4  170.38    8.80
   1   5   4  170.98    9.20
  -1   5  -4  181.48   13.30
   1  -5  -4  176.38   13.30
  -1  -5   4  168.88   11.70
  -1   5  -4  181.68    9.40
   1   5   4  183.08   11.70
  -1   5  -4  189.08   11.20
  -1  -5   4  171.18   11.00
   1  -5  -4  189.48    9.20
   1   5   4  165.98   11.60
  -1   5  -4  182.88    9.20
   1  -5  -4  174.38    8.90
  -1  -5   4  176.38   11.40
  -2  -5  -4  103.19    7.70
  -2  -5  -4   97.19    5.20
  -2   5   4   87.19    7.70
  -2   5   4  100.09    7.20
   2  -5   4   97.39    5.30
  -2  -5  -4  107.09    5.50
   2   5  -4  100.39    5.60
   2  -5   4   99.99    8.30
  -2  -5  -4  103.79    9.30
  -2   5   4   99.69    5.60
  -2   5  -4   95.99    5.60
  -2  -5   4   96.29    7.50
   2  -5  -4   89.99    8.80
   2   5   4   91.29    6.90
  -2  -5   4   98.09    8.40
   2   5   4   98.79    7.80
   2  -5  -4  102.99    5.50
   2   5   4  101.19    5.60
  -2  -5   4   86.59    7.80
  -2   5  -4  100.29    9.20
  -2  -5   4  107.69    8.20
   2   5   4   97.69    8.30
  -2   5  -4  105.29    5.80
   2  -5  -4   99.79    5.20
  -2   5  -4  106.99    7.50
  -3  -5  -4  133.99   10.20
  -3  -5  -4  128.29   11.10
   3  -5   4  137.79    7.30
  -3   5   4  132.29    8.90
  -3  -5  -4  149.29    7.30
   3  -5   4  140.39    7.10
   3  -5   4  127.69   10.40
  -3  -5  -4  144.69   10.00
  -3   5   4  128.39    7.30
   3   5  -4  138.49    7.50
  -3   5   4  140.09   10.10
   3  -5  -4  146.59    7.10
   3   5   4  145.69    7.50
   3  -5  -4  143.69    7.40
   3   5   4  125.99   10.50
  -3   5  -4  148.79    7.80
  -3   5  -4  123.69   11.40
   3  -5  -4  127.19   10.80
  -3  -5   4  132.19   10.20
   3   5   4  139.29    9.40
  -3   5  -4  144.59    9.70
  -3   5  -4  131.19    7.40
  -3  -5   4  127.49   10.30
   4   5  -4   76.99    7.20
  -4  -5  -4   87.79    4.90
  -4   5   4   85.49    4.80
   4   5  -4   82.29    4.70
   4   5  -4   88.69    4.90
  -4   5   4   87.99    5.00
   4   5  -4   85.19    5.00
  -4   5   4   81.69    4.90
  -4  -5  -4   84.09    5.00
   4   5  -4   76.29    4.80
  -4   5   4   76.39    4.50
   4   5  -4   83.19    5.00
   4  -5   4   90.29    5.00
   4  -5   4   92.89    4.70
   4   5  -4   78.89    4.80
  -4  -5  -4   86.59    7.50
  -4  -5  -4   89.89    4.60
  -4   5  -4   81.79    4.70
   4  -5  -4   81.69    9.80
   4  -5  -4   87.19    5.10
   4  -5  -4   86.99    4.90
  -4   5  -4   81.39    4.70
  -4   5  -4   84.99    4.70
   4   5   4   85.29    5.00
   4  -5  -4   86.19    4.60
   4   5   4   81.69    4.90
   4   5   4   83.69    5.00
   4   5   4   86.09    4.70
   4  -5  -4   87.79    4.50
  -4   5  -4   84.69    7.10
  -4   5  -4   86.29    5.00
   4   5   4   78.39    4.80
  -4   5  -4   90.79    5.40
   4   5   4   87.49    4.70
  -4   5  -4   84.49    5.00
   4   5   4   91.19    7.50
  -4   5  -4   83.89    4.60
  -4   5  -4   92.09    5.10
   5  -5   4   85.79    5.10
  -5  -5  -4   88.49    4.70
   5   5  -4   84.79    4.80
  -5  -5  -4   80.09    7.30
  -5   5   4   78.09    4.60
   5   5  -4   81.19    4.70
   5  -5   4   91.59    4.80
   5  -5   4   89.89    5.40
   5   5  -4   81.09    4.90
  -5   5   4   82.09    5.00
  -5   5   4   87.29    4.80
  -5  -5  -4   78.29    5.00
   5   5  -4   87.19    5.00
   5   5  -4   85.49    5.00
   5   5  -4   83.39    5.10
  -5   5   4   87.89    5.00
  -5   5  -4   88.59    5.10
  -5   5  -4   80.89    4.70
   5  -5  -4   80.89    4.90
   5   5   4   91.09    5.10
  -5   5  -4   86.59    4.70
   5  -5  -4   83.49    4.40
   5   5   4   82.69    5.00
  -5   5  -4   78.79    7.20
   5  -5  -4   87.89    5.20
   5   5   4   84.99    4.90
  -5   5  -4   90.59    5.10
  -5   5  -4   83.29    4.70
   5   5   4   85.79    4.70
   5   5   4   89.29    5.10
   5   5   4   86.09    4.70
  -5   5  -4   81.39    4.70
   5   5   4   77.19    7.80
  -5   5  -4   89.29    5.10
   6   5  -4   60.89    3.90
   6   5  -4   65.89    4.10
  -6  -5  -4   63.69    4.10
   6  -5   4   63.99    4.00
   6   5  -4   59.39    3.70
   6   5  -4   64.89    3.90
   6   5  -4   61.49    3.80
  -6   5   4   64.49    4.00
   6  -5   4   71.09    4.10
  -6  -5  -4   59.09    3.50
   6  -5   4   68.69    4.60
  -6   5   4   65.89    4.20
   6   5  -4   62.99    3.90
  -6  -5  -4   63.59    3.70
   6  -5  -4   61.49    3.70
  -6   5  -4   62.49    3.70
   6   5   4   65.79    3.80
   6  -5  -4   62.19    3.90
  -6  -5   4   60.59    3.70
   6   5   4   62.29    4.00
   6   5   4   61.59    4.00
  -6   5  -4   65.99    4.20
   6  -5  -4   64.09    4.20
  -6   5  -4   60.39    3.70
   6   5   4   62.59    3.70
   6   5   4   63.49    4.00
   6   5   4   69.19    4.00
   7   5  -4   13.30    1.40
  -7  -5  -4   12.80    1.50
   7   5  -4   13.70    1.50
  -7  -5  -4   14.00    1.20
   7   5  -4   13.80    1.60
  -7   5   4   15.10    1.50
   7  -5   4   13.20    1.50
   7   5  -4   16.90    1.60
  -7  -5  -4   15.20    1.90
  -7   5   4   15.00    1.60
  -7  -5  -4   13.00    1.30
   7   5  -4   13.80    1.70
   7  -5   4   16.20    1.90
   7   5  -4   16.30    1.90
   7  -5  -4   14.50    1.60
  -7   5  -4   15.80    1.40
   7   5   4   17.00    1.40
  -7  -5   4   13.80    1.30
   7  -5  -4   16.80    1.60
  -7   5  -4   16.10    1.70
   7   5   4   16.60    1.60
  -7  -5   4   15.90    1.60
   7   5   4   15.50    1.60
  -7   5  -4   14.80    1.40
   7  -5  -4   16.20    1.80
   7   5   4   16.70    1.60
   7   5   4   15.10    1.90
   8   5  -4    7.70    1.20
   8   5  -4    9.70    1.20
   8   5  -4    9.10    1.20
  -8  -5  -4    8.00    1.40
  -8  -5  -4    9.80    1.10
  -8   5   4    8.80    1.20
  -8   5   4    5.80    1.00
  -8  -5  -4    9.80    1.30
   8  -5   4    8.50    1.20
   8   5  -4    8.20    1.10
   8  -5   4    7.90    1.00
   8   5  -4    9.70    1.30
   8  -5   4    9.30    1.50
   8   5  -4    8.60    1.00
  -8  -5   4    8.60    1.20
   8   5   4    9.90    1.40
   8   5   4    8.20    1.20
   8   5   4    8.70    1.20
  -8   5  -4    8.90    1.00
   8   5   4    7.20    1.00
  -8  -5   4    9.90    1.10
   8  -5  -4    9.00    1.10
  -8   5  -4   10.60    1.10
   8  -5  -4   11.60    1.60
   8  -5  -4    8.70    1.20
   8   5   4    9.80    1.40
  -9  -5  -4    6.60    0.90
   9   5  -4    5.40    0.80
  -9  -5  -4    6.00    0.80
   9   5  -4    5.10    1.00
  -9  -5  -4    7.20    0.70
  -9   5   4    7.30    1.00
   9  -5   4    7.30    0.90
   9  -5   4    3.90    0.80
   9   5  -4    7.00    0.90
   9   5  -4    6.10    0.90
  -9  -5   4    7.00    1.00
   9  -5  -4    5.70    1.00
  -9  -5   4    6.70    0.80
   9   5   4    5.40    0.90
   9   5   4    4.80    0.80
  -9   5  -4    5.60    0.70
   9   5   4    6.60    0.90
   9   5   4    4.00    0.70
   9  -5  -4    5.90    0.80
  -9  -5   4    5.90    0.80
   9  -5  -4    4.40    0.80
   0  -6   4   69.19    6.80
   0   6  -4   79.09    4.50
   0  -6  -4   74.59    4.30
   0  -6  -4   78.99    4.10
   0   6  -4   74.59    6.10
   0   6  -4   65.59    7.60
   0   6  -4   67.99    4.50
   0  -6  -4   68.79    8.00
   0   6   4   71.99    6.80
   0   6   4   76.89    4.50
   0  -6  -4   73.19    6.30
   1   6  -4  255.97   13.00
  -1   6   4  240.18   12.90
   1  -6   4  240.88   16.20
   1   6  -4  256.47   14.80
  -1  -6  -4  268.47   12.70
  -1  -6  -4  227.68   15.20
  -1  -6  -4  230.38   19.60
  -1  -6  -4  256.57   12.40
  -1   6   4  206.78   16.50
   1   6  -4  239.48   12.80
   1  -6   4  255.07   12.40
   1   6   4  199.48   16.50
  -1   6  -4  262.97   12.80
   1  -6  -4  253.87   15.30
  -1   6  -4  263.27   12.90
  -1  -6   4  234.18   16.90
   1  -6  -4  251.07   12.40
  -1   6  -4  256.27   13.10
   1   6   4  256.47   12.80
   1   6   4  272.97   13.00
  -1   6  -4  249.28   12.70
   1  -6  -4  254.07   12.70
   1   6   4  258.07   12.70
  -1   6  -4  262.47   15.30
  -2  -6  -4  165.88    8.30
   2  -6   4  160.18    8.10
   2   6  -4  156.38    8.50
  -2   6   4  145.89    7.90
  -2  -6  -4  162.68   11.10
   2   6  -4  150.38    8.30
  -2   6   4  153.78    8.10
  -2   6   4  159.48    8.10
  -2   6   4  154.48    8.30
  -2  -6  -4  163.38    8.00
  -2   6   4  143.89    8.20
  -2   6   4  161.18    8.50
  -2   6   4  147.69   10.30
   2   6   4  171.28    8.60
  -2   6  -4  159.18    8.30
   2   6   4  151.08    8.30
   2  -6  -4  168.48    8.40
   2  -6  -4  148.99    7.80
   2   6   4  161.28    8.40
  -2   6  -4  141.79    8.20
  -2   6  -4  152.38   10.80
   2  -6  -4  159.88    8.00
  -2   6  -4  160.28    8.70
   2   6   4  161.38    8.10
   2   6   4  160.68    8.00
  -2   6  -4  143.29    8.00
  -2   6  -4  157.68    8.50
  -2   6  -4  155.08    8.10
  -2   6  -4  153.48    8.10
   2   6   4  151.28    8.30
   2   6   4  154.18    8.00
  -3   6   4  535.15   25.90
  -3  -6  -4  574.54   25.90
   3   6  -4  476.75   25.60
   3   6  -4  482.65   25.90
  -3   6   4  531.75   25.90
  -3  -6  -4  550.14   29.30
  -3   6   4  484.45   25.50
  -3   6   4  502.35   25.60
  -3   6   4  492.05   28.20
   3   6  -4  490.05   25.60
   3   6  -4  484.55   25.60
   3  -6   4  535.25   25.60
   3  -6   4  534.65   25.90
  -3   6   4  523.45   25.70
  -3   6   4  564.54   26.10
   3  -6  -4  538.55   26.00
  -3   6  -4  553.54   26.50
   3  -6  -4  459.45   25.60
   3   6   4  538.65   25.90
   3   6   4  521.95   25.90
   3   6   4  546.95   25.60
  -3   6  -4  536.75   25.70
   3   6   4  515.35   25.60
   3   6   4  556.04   26.10
  -3   6  -4  531.35   26.10
   3   6   4  549.35   26.00
  -3   6  -4  534.25   25.80
   3  -6  -4  574.84   25.70
  -3   6  -4  531.75   25.70
  -3   6  -4  525.35   29.00
  -3  -6   4  529.35   29.10
  -3   6  -4  518.45   25.50
  -3   6  -4  520.15   25.90
   3   6   4  496.25   25.60
  -3   6  -4  553.44   25.60
   3  -6  -4  518.25   25.40
   4  -6   4   48.60    3.00
  -4  -6  -4   53.19    3.30
   4   6  -4   48.30    3.10
  -4  -6  -4   45.60    3.30
  -4  -6  -4   46.60    5.40
  -4   6   4   44.90    2.90
  -4   6   4   52.39    3.30
   4   6  -4   46.90    3.10
  -4   6   4   45.40    3.10
   4   6  -4   53.99    3.20
   4  -6   4   48.70    3.30
   4   6  -4   42.00    3.10
  -4   6   4   51.39    3.30
   4   6  -4   48.80    3.30
  -4  -6  -4   49.90    3.00
  -4   6  -4   48.00    5.80
  -4   6  -4   48.10    3.30
  -4   6  -4   47.90    3.10
   4  -6  -4   52.69    3.00
   4   6   4   45.10    2.90
   4  -6  -4   49.70    2.80
  -4  -6   4   42.40    5.40
   4   6   4   45.70    3.30
  -4   6  -4   48.30    3.30
  -4   6  -4   50.39    3.10
   4   6   4   47.80    3.30
  -4   6  -4   49.20    3.00
  -4   6  -4   48.20    3.50
   4   6   4   47.80    3.00
   4   6   4   59.19    3.60
   4   6   4   50.29    3.00
  -4   6  -4   50.19    3.10
   4   6   4   47.60    3.20
   4  -6  -4   49.70    3.20
  -4   6  -4   50.19    3.90
   5  -6   4  269.27   15.30
   5  -6   4  272.07   14.60
   5   6  -4  281.37   14.70
  -5   6   4  291.47   14.80
  -5   6   4  293.77   15.00
  -5  -6  -4  301.37   14.70
  -5   6   4  263.07   14.50
   5  -6   4  296.47   15.10
   5   6  -4  307.27   14.90
   5   6  -4  288.67   14.80
   5   6  -4  290.87   14.90
  -5   6   4  294.37   14.90
  -5  -6  -4  292.07   15.00
  -5   6  -4  289.07   15.00
  -5   6  -4  292.57   14.70
   5   6   4  307.77   15.00
   5   6   4  306.27   14.70
   5   6   4  294.47   14.80
  -5   6  -4  285.77   15.00
  -5   6  -4  292.97   14.70
   5  -6  -4  309.07   14.40
  -5   6  -4  299.97   15.10
   5  -6  -4  296.67   14.90
   5   6   4  323.77   15.10
   5   6   4  294.17   15.10
   5  -6  -4  288.67   15.10
   5   6   4  305.57   14.70
  -5   6  -4  294.67   14.70
  -5   6  -4  304.97   14.70
   6   6  -4   38.10    2.60
  -6  -6  -4   33.80    2.20
  -6   6   4   35.80    2.60
   6  -6   4   36.70    2.60
   6   6  -4   37.30    2.60
  -6  -6  -4   36.20    2.40
  -6  -6  -4   35.30    2.80
   6  -6   4   38.50    3.00
   6  -6   4   31.40    2.90
   6   6  -4   34.60    2.80
   6   6  -4   35.30    2.50
  -6   6   4   34.10    2.30
  -6   6   4   33.20    2.70
   6  -6   4   33.10    3.10
   6  -6  -4   36.90    2.90
   6   6   4   36.60    2.40
   6   6   4   36.80    2.70
  -6   6  -4   33.90    2.90
  -6   6  -4   35.80    2.50
  -6   6  -4   36.70    2.50
   6  -6  -4   35.10    2.30
  -6   6  -4   34.00    2.40
   6   6   4   37.90    2.80
  -6  -6   4   31.60    2.30
   6   6   4   36.50    2.60
   6  -6  -4   37.20    2.60
   6   6   4   38.60    2.70
  -6   6  -4   36.40    2.70
   6   6   4   37.00    2.30
  -7  -6  -4   89.19    4.90
   7   6  -4   89.99    5.50
   7   6  -4   91.49    5.40
   7  -6   4   93.19    5.70
   7  -6   4   96.29    5.20
  -7   6   4   80.29    5.20
   7   6  -4   97.59    5.30
  -7  -6  -4   87.49    5.40
   7   6  -4   95.09    5.20
  -7  -6  -4   97.19    5.10
  -7  -6  -4   92.39    4.80
   7   6  -4   94.49    5.10
  -7   6  -4   93.29    5.00
   7  -6  -4   95.29    5.50
   7  -6  -4   88.39    5.20
  -7   6  -4   98.49    5.40
  -7   6  -4   99.89    5.10
   7   6   4   87.39    5.30
   7   6   4   81.09    5.00
  -7  -6   4   86.29    5.10
   7   6   4   95.19    5.40
   7   6   4   96.09    5.30
   7   6   4   96.69    5.30
   7  -6  -4   89.39    4.90
  -8  -6  -4   38.60    2.40
   8   6  -4   40.30    2.60
  -8  -6  -4   43.10    2.40
   8   6  -4   38.30    2.50
   8  -6   4   39.20    2.60
   8   6  -4   43.20    2.70
  -8   6   4   43.40    2.70
   8  -6   4   40.40    2.60
   8  -6   4   41.30    3.00
   8   6  -4   40.80    2.70
   8  -6  -4   39.60    2.80
  -8   6  -4   41.40    2.50
   8   6   4   42.10    2.60
   8   6   4   38.70    2.60
  -8  -6   4   34.80    2.30
   8   6   4   40.90    2.60
   8  -6  -4   38.90    2.70
   8   6   4   39.30    2.40
   8   6   4   39.50    2.70
  -8   6  -4   41.80    2.40
   9  -6   4   41.80    2.40
   9   6  -4   41.60    2.40
  -9  -6  -4   41.40    2.30
  -9  -6  -4   40.60    2.20
   9   6  -4   40.80    2.30
   9   6  -4   41.50    2.40
   9   6  -4   39.30    2.40
   9  -6  -4   41.00    2.40
   9   6   4   36.20    2.30
   9   6   4   39.40    2.40
   9   6   4   42.30    2.40
  -9   6  -4   33.50    2.20
  -9  -6   4   36.50    2.10
   9   6   4   38.10    2.30
   0   7   4   67.09    4.10
   0   7   4   69.09    4.50
   0   7   4   71.99    4.50
   0   7  -4   81.29    4.80
   0  -7  -4   73.99    4.10
   0   7  -4   73.29    4.30
   0   7   4   72.79    4.10
   0   7  -4   77.49    4.20
   0   7  -4   68.99    4.00
   0   7   4   72.09    4.20
   0   7  -4   65.29    4.20
   0   7  -4   71.89    4.50
   0  -7  -4   68.59    6.90
   0   7   4   70.99    4.10
   0   7  -4   70.89    4.20
   0   7   4   76.49    4.40
  -1  -7  -4  445.16   21.40
  -1   7   4  438.76   21.80
   1   7  -4  400.36   21.60
  -1   7   4  443.16   21.40
  -1   7   4  457.45   22.00
   1   7  -4  473.25   22.00
  -1  -7  -4  421.46   21.70
   1   7  -4  403.06   21.30
  -1   7   4  462.65   21.60
  -1   7   4  415.36   21.50
   1   7  -4  409.06   21.40
   1   7  -4  430.26   21.50
   1  -7   4  429.36   21.40
   1   7  -4  422.96   21.90
  -1  -7  -4  421.66   25.00
  -1   7   4  434.06   21.50
  -1   7   4  458.65   21.80
  -1   7  -4  440.06   21.50
  -1   7  -4  436.36   21.80
  -1   7  -4  406.76   21.50
   1  -7  -4  419.36   21.20
   1  -7  -4  411.46   24.60
  -1   7  -4  465.15   22.20
   1   7   4  448.16   21.80
   1   7   4  441.56   21.50
   1   7   4  446.96   22.00
  -1   7  -4  416.16   24.50
  -1   7  -4  461.05   21.60
   1   7   4  458.65   21.60
   1  -7  -4  486.35   21.50
   1  -7  -4  386.46   21.70
  -1   7  -4  449.36   22.00
   1   7   4  426.66   21.40
   1   7   4  453.35   21.90
  -1   7  -4  456.35   21.60
   1   7   4  466.35   21.80
  -2   7   4  184.38    9.90
   2   7  -4  197.48   10.20
  -2   7   4  193.08   10.30
   2   7  -4  186.68   10.30
   2   7  -4  177.18   10.00
  -2   7   4  204.78   10.10
  -2   7   4  183.38   10.10
  -2   7   4  193.88    9.90
  -2  -7  -4  210.98   10.20
   2  -7   4  202.18   10.10
  -2   7   4  205.78   10.10
  -2  -7  -4  182.18   13.20
  -2   7   4  199.78   10.40
   2   7  -4  172.98    9.80
  -2  -7  -4  193.38    9.80
   2   7   4  196.28   10.40
   2   7   4  199.78   10.00
   2   7   4  196.28   10.20
  -2   7  -4  204.98   10.60
   2   7   4  195.18   10.20
   2   7   4  191.38   10.20
  -2   7  -4  200.28    9.90
   2  -7  -4  201.48    9.90
  -2   7  -4  168.68   12.70
  -2   7  -4  200.98   10.30
  -2   7  -4  195.68   10.10
  -2   7  -4  193.18    9.90
   2  -7  -4  189.98    9.70
  -2   7  -4  197.78   10.10
  -2   7  -4  198.68   10.00
   2   7   4  200.78   10.00
  -2   7  -4  207.18   10.70
   2  -7  -4  197.18   10.30
   2   7   4  181.28    9.90
   3  -7   4   97.19    5.40
  -3   7   4   92.89    5.40
  -3   7   4   98.29    5.50
  -3  -7  -4   99.29    5.70
  -3   7   4  102.89    5.60
  -3   7   4   97.19    5.60
   3  -7   4  100.09    5.70
  -3   7   4  103.09    5.80
  -3   7   4  100.19    5.80
  -3   7   4  110.19    6.00
  -3   7  -4  102.69    6.10
   3  -7  -4   92.29    5.20
   3   7   4  102.89    5.50
   3   7   4   97.49    5.80
   3   7   4  107.69    6.00
  -3   7  -4   98.59    5.50
  -3   7  -4   97.59    5.60
   3   7   4  109.29    5.90
  -3   7  -4  105.89    5.60
  -3   7  -4  103.79    6.30
   3  -7  -4  101.29    5.50
   3   7   4  111.69    5.60
  -3   7  -4   94.99    5.50
   3   7   4   93.69    5.50
  -3   7  -4  106.39    5.90
   3   7   4  104.29    5.80
  -3   7  -4  100.39    5.80
   3  -7  -4  104.59    5.90
   3  -7  -4   96.99    5.60
  -4   7   4   57.09    3.50
   4  -7   4   57.09    3.30
  -4   7   4   58.19    3.70
  -4   7   4   51.59    3.30
   4   7  -4   52.39    3.40
  -4  -7  -4   61.39    3.70
  -4  -7  -4   53.09    3.60
   4   7  -4   55.89    3.60
   4  -7   4   56.19    3.70
  -4   7   4   59.69    3.30
  -4   7   4   53.69    3.60
  -4  -7  -4   59.09    3.30
  -4   7   4   52.79    3.70
   4   7   4   54.29    3.60
   4   7   4   56.19    3.30
   4   7   4   59.39    3.80
  -4   7  -4   55.29    3.80
  -4   7  -4   55.19    3.80
  -4   7  -4   58.19    3.40
   4  -7  -4   56.29    3.40
  -4   7  -4   57.29    3.40
  -4   7  -4   55.69    3.80
  -4   7  -4   50.69    3.40
   4   7   4   57.39    3.60
   4   7   4   57.29    3.40
   4   7   4   52.49    3.40
   4  -7  -4   56.79    3.20
  -4   7  -4   52.59    3.40
   4  -7  -4   52.89    3.50
  -5   7   4  146.39    7.40
  -5  -7  -4  145.39    7.70
   5  -7   4  142.79    7.80
  -5  -7  -4  151.98    7.40
   5  -7   4  138.99    8.20
   5   7  -4  133.49    7.50
   5  -7   4  132.99    7.60
   5   7  -4  138.59    7.50
   5   7  -4  133.49    7.60
   5   7  -4  134.39    7.50
  -5   7   4  140.99    7.80
  -5   7   4  150.08    7.60
  -5   7   4  139.39    7.60
   5  -7   4  130.19    7.50
   5   7   4  151.98    7.80
   5   7   4  143.39    7.40
  -5   7  -4  148.49    8.00
   5   7   4  140.29    7.50
  -5   7  -4  143.29    7.50
   5   7   4  140.79    7.50
  -5   7  -4  150.08    7.50
  -5   7  -4  142.79    7.40
   5  -7  -4  146.39    7.20
   5   7   4  141.79    7.70
   5  -7  -4  142.79    7.60
   5  -7  -4  118.49    7.30
  -5   7  -4  142.59    7.50
  -5   7  -4  143.79    7.80
   5   7   4  156.68    7.80
  -6  -7  -4    6.30    0.90
   6   7  -4    9.10    1.20
   6   7  -4    8.40    1.30
  -6  -7  -4    8.20    1.10
   6  -7   4    9.80    1.30
  -6   7   4    8.00    1.30
   6  -7   4   11.00    1.40
  -6  -7  -4    8.70    1.40
   6   7  -4   10.00    1.40
  -6   7   4    9.20    1.00
   6  -7   4    9.70    1.60
   6   7  -4    9.80    1.30
   6   7   4    9.00    1.30
  -6   7  -4    8.80    1.10
  -6   7  -4    7.20    1.00
  -6   7  -4    9.70    1.20
   6  -7  -4    8.60    1.20
   6  -7  -4    9.00    1.10
   6   7   4    9.00    1.30
   6   7   4    7.30    1.00
  -6   7  -4    7.90    1.10
  -6   7  -4    7.30    1.20
   6  -7  -4    8.30    0.80
   6   7   4    9.20    1.20
   6   7   4    8.20    1.00
  -6   7  -4    6.00    1.00
   6   7   4    7.50    1.30
   6  -7  -4    7.80    1.30
   7   7  -4   40.90    2.70
  -7  -7  -4   41.00    2.50
   7  -7   4   42.60    2.70
   7   7  -4   44.80    2.90
   7  -7   4   41.30    3.00
  -7   7   4   41.00    2.80
   7   7  -4   38.50    2.60
  -7  -7  -4   40.20    2.30
  -7  -7  -4   36.20    2.80
  -7  -7  -4   40.60    2.40
   7   7  -4   42.00    2.70
   7   7   4   45.40    2.90
   7   7   4   44.00    2.70
   7   7   4   41.00    2.50
   7   7   4   43.40    2.70
   7  -7  -4   39.90    2.80
   7   7   4   39.90    2.80
   7  -7  -4   40.20    2.50
  -7  -7   4   32.50    2.50
  -7   7  -4   43.50    2.50
  -7   7  -4   42.60    2.50
   7  -7  -4   41.80    2.70
   8  -7   4   33.30    2.40
   8   7  -4   35.10    2.10
   8  -7   4   37.30    2.20
   8  -7   4   33.30    2.10
   8   7  -4   29.60    2.10
   8   7  -4   34.00    2.30
  -8   7   4   32.50    2.20
  -8  -7  -4   37.50    2.00
   8   7  -4   31.80    2.10
  -8  -7  -4   32.20    2.00
   8  -7  -4   29.20    2.10
  -8   7  -4   34.10    2.00
   8   7   4   35.30    2.20
   8   7   4   35.40    2.10
   8   7   4   34.90    2.30
   8   7   4   39.00    2.50
  -8   7  -4   34.60    2.00
   8   7   4   36.10    2.00
   0   8  -4  140.69    7.50
   0  -8  -4  133.89    7.70
   0   8  -4  150.48    7.60
   0  -8  -4  149.79    7.40
   0   8   4  144.79    7.60
   0   8   4  132.69    7.40
   0   8   4  148.09    7.80
   0   8  -4  146.49    8.00
   0   8  -4  134.49    7.90
   0   8  -4  143.59    7.70
   0   8   4  141.89    7.50
   0   8   4  142.59    7.70
   0   8  -4  142.69    7.40
   0   8   4  140.29    7.40
   0   8   4  129.39    7.90
  -1   8   4   62.99    3.90
   1   8  -4   63.49    3.80
   1   8  -4   61.49    3.70
  -1   8   4   64.79    4.20
  -1   8   4   64.59    3.80
  -1   8   4   64.19    3.80
   1   8  -4   58.89    4.10
   1  -8   4   62.79    3.70
   1   8  -4   55.19    3.80
  -1  -8  -4   64.29    4.00
   1   8  -4   65.39    4.20
  -1   8   4   68.59    4.10
  -1   8   4   60.39    3.70
  -1  -8  -4   64.89    3.70
   1   8  -4   61.49    3.70
  -1   8   4   66.29    4.00
   1  -8  -4   64.59    3.70
  -1   8  -4   58.89    3.80
   1   8   4   66.29    3.80
   1   8   4   60.49    4.00
  -1   8  -4   65.39    3.80
  -1   8  -4   63.69    4.30
   1  -8  -4   61.29    3.50
  -1   8  -4   66.09    4.10
  -1   8  -4   61.69    3.90
  -1   8  -4   61.39    4.20
  -1   8  -4   68.59    3.80
   1   8   4   67.69    4.00
  -1   8  -4   60.89    3.60
   1   8   4   64.49    3.80
   1   8   4   63.59    3.70
   1   8   4   62.99    4.30
  -2   8   4  221.08   11.60
  -2   8   4  228.38   11.90
  -2  -8  -4  232.08   11.60
   2   8  -4  221.78   12.00
  -2   8   4  240.78   12.00
  -2   8   4  218.68   11.60
  -2   8   4  245.78   12.20
   2  -8   4  247.28   11.90
  -2   8   4  252.07   11.80
  -2  -8  -4  244.58   12.00
  -2   8   4  235.98   11.80
   2  -8   4  222.88   11.50
  -2   8  -4  195.58   12.10
   2  -8  -4  238.38   11.40
   2   8   4  239.08   12.20
  -2   8  -4  236.58   11.80
   2   8   4  227.58   11.70
   2   8   4  212.38   11.80
  -2   8  -4  216.68   11.70
  -2   8  -4  237.38   11.70
   2   8   4  231.68   12.00
   2   8   4  234.48   12.00
  -2   8  -4  224.58   11.50
   2   8   4  236.28   11.70
  -2   8  -4  230.68   12.00
  -2   8  -4  237.88   11.80
   2  -8  -4  198.88   11.60
   2   8   4  238.08   11.70
  -2   8  -4  234.48   12.40
  -3   8   4   94.09    5.40
  -3  -8  -4  101.79    5.30
  -3   8   4   91.09    5.30
   3  -8   4  107.59    5.70
  -3   8   4   95.19    5.30
  -3  -8  -4   99.19    5.60
  -3   8   4  100.59    5.60
  -3   8   4  100.99    5.80
  -3   8   4   92.79    5.40
   3  -8   4  101.79    5.30
  -3   8   4   94.09    5.20
   3   8   4  102.99    5.30
   3   8   4   90.69    5.50
  -3   8  -4   93.29    5.50
   3   8   4   98.29    5.60
   3   8   4   93.69    5.30
   3  -8  -4   87.69    5.20
  -3   8  -4   92.79    5.30
  -3   8  -4   90.49    5.70
  -3   8  -4   95.49    5.20
  -3   8  -4   93.19    5.40
  -3   8  -4   98.99    6.10
   3   8   4   97.79    5.30
   3  -8  -4   98.69    5.10
  -3   8  -4  101.09    5.40
   3   8   4   92.79    5.50
  -3   8  -4   96.09    5.80
   4  -8   4   68.09    4.00
   4  -8   4   76.19    4.50
  -4   8   4   69.89    4.30
  -4   8   4   70.89    4.00
   4  -8   4   70.39    4.70
  -4   8   4   70.79    4.30
  -4  -8  -4   74.59    4.00
  -4  -8  -4   72.89    4.40
  -4   8   4   70.49    4.00
  -4   8   4   72.79    4.20
  -4   8   4   66.49    4.10
   4  -8  -4   70.79    4.10
   4   8   4   66.19    4.20
  -4   8  -4   74.59    4.00
  -4   8  -4   70.09    4.50
  -4   8  -4   68.69    4.30
   4   8   4   65.69    4.00
   4   8   4   73.79    4.30
   4   8   4   71.09    4.00
   4  -8  -4   70.49    4.00
  -4   8  -4   65.19    4.00
   4  -8  -4   63.99    4.30
  -4   8  -4   69.19    4.50
   4   8   4   66.59    4.30
   4   8   4   66.39    4.00
   4  -8  -4   69.69    3.80
  -4   8  -4   69.09    4.10
  -4   8  -4   73.19    4.10
  -5   8   4   43.40    3.10
   5   8  -4   41.30    3.00
  -5   8   4   47.50    2.80
  -5  -8  -4   49.30    2.80
  -5  -8  -4   48.70    3.20
   5  -8   4   47.50    3.00
   5  -8   4   52.39    3.30
   5  -8   4   44.10    3.20
   5  -8   4   49.80    3.60
  -5   8  -4   50.59    3.00
   5   8   4   42.50    2.90
   5   8   4   40.10    3.00
   5   8   4   45.70    2.80
  -5   8  -4   49.60    3.10
   5  -8  -4   47.60    2.60
   5   8   4   43.80    3.00
   5   8   4   48.80    3.20
   5  -8  -4   52.39    3.00
  -5   8  -4   50.79    3.00
  -5   8  -4   43.60    2.90
  -5   8  -4   47.70    3.20
   5  -8  -4   47.80    3.10
  -5   8  -4   42.80    3.40
  -6  -8  -4  175.48    9.60
   6  -8   4  190.68    9.40
   6   8  -4  182.58    9.50
   6  -8   4  177.38    9.30
  -6  -8  -4  176.28    9.10
   6  -8   4  190.88    9.90
   6   8  -4  162.78    9.30
  -6  -8  -4  192.58    9.30
  -6   8   4  188.28    9.20
   6   8  -4  179.28    9.30
  -6   8   4  185.18    9.60
   6   8   4  182.68    9.30
  -6   8  -4  170.28    9.50
   6   8   4  198.48    9.60
  -6   8  -4  181.28    9.30
  -6   8  -4  180.68    9.30
  -6   8  -4  195.48    9.40
   6   8   4  182.08    9.20
   6  -8  -4  185.68    9.30
  -6   8  -4  189.78    9.30
   6   8   4  200.18    9.60
   6  -8  -4  188.88    9.40
   6   8   4  186.28    9.60
  -7   8   4   12.00    1.20
   7  -8   4   10.90    0.80
   7  -8   4   11.70    1.10
   7   8  -4   10.00    1.00
   7  -8   4   12.00    1.10
  -7  -8  -4   11.90    1.00
  -7  -8  -4    9.70    0.90
   7   8  -4   11.70    1.30
   7   8  -4    9.60    1.00
   7  -8   4   11.30    1.50
   7   8   4   11.20    1.20
  -7   8  -4   10.40    1.00
   7   8   4   12.70    1.40
   7  -8  -4   12.20    1.10
   7   8   4   11.70    1.20
   7  -8  -4   10.90    0.90
   7   8   4   10.60    1.00
  -7   8  -4   12.60    1.00
   0   9   4    6.30    1.00
   0  -9  -4    9.60    1.40
   0  -9   4    7.40    1.00
   0   9  -4    9.60    1.30
   0   9   4    8.00    1.00
   0   9   4   11.70    1.40
   0   9   4    7.90    1.30
   0   9  -4    7.60    1.10
   0   9  -4    7.40    1.40
   0   9   4    7.20    1.20
   0   9   4   10.10    1.40
   0  -9  -4    8.20    1.10
   0  -9  -4    7.60    0.90
   0   9  -4    7.40    1.10
   0   9  -4   11.00    1.30
   0   9   4    7.70    1.10
  -1   9   4   56.69    3.80
  -1   9   4   54.79    3.70
   1   9  -4   54.19    3.70
  -1   9   4   55.99    3.40
  -1   9   4   54.49    3.50
  -1   9   4   59.19    3.60
   1  -9   4   55.49    3.40
   1   9  -4   56.89    3.40
  -1   9   4   58.19    3.40
   1   9  -4   55.49    3.40
  -1  -9  -4   59.39    3.40
  -1  -9  -4   56.29    3.70
   1   9  -4   54.79    3.50
  -1   9   4   57.59    3.50
  -1   9  -4   60.19    3.50
   1  -9  -4   57.39    3.70
   1   9   4   56.39    3.40
   1  -9  -4   54.29    3.20
  -1   9  -4   59.79    3.40
   1   9   4   56.19    3.90
   1   9   4   57.09    3.40
  -1   9  -4   51.09    3.70
   1   9   4   58.79    3.50
   1  -9  -4   61.69    3.40
  -1   9  -4   55.59    3.80
  -1   9  -4   58.29    3.30
   1   9   4   57.09    3.60
  -1   9  -4   62.69    3.70
  -1   9  -4   54.69    4.00
   1   9   4   51.39    3.70
  -2   9   4   26.60    2.20
   2  -9   4   26.70    2.10
  -2   9   4   26.30    1.90
  -2   9   4   30.40    2.10
   2  -9   4   27.60    1.90
  -2   9   4   26.90    2.10
  -2   9   4   26.10    1.90
  -2   9   4   26.00    2.30
  -2   9   4   26.60    2.20
  -2  -9  -4   26.90    2.10
  -2   9  -4   25.90    1.90
  -2   9  -4   24.60    2.70
   2   9   4   25.40    2.30
   2   9   4   28.30    2.20
   2  -9  -4   27.40    2.40
   2  -9  -4   24.50    1.90
   2   9   4   26.30    1.90
   2   9   4   24.90    1.90
  -2   9  -4   27.30    2.10
  -2   9  -4   24.50    2.50
   2   9   4   29.40    2.20
  -2   9  -4   24.10    2.00
   2   9   4   23.60    2.10
  -2   9  -4   25.60    2.00
   2  -9  -4   26.20    1.80
  -3   9   4   18.20    1.50
   3  -9   4   14.70    1.30
  -3  -9  -4   15.70    1.80
  -3   9   4   15.00    1.30
  -3  -9  -4   16.70    1.70
  -3  -9  -4   15.60    1.40
  -3   9   4   12.50    1.50
  -3   9   4   16.90    1.50
   3  -9   4   18.00    1.80
  -3   9   4   14.40    1.40
   3  -9   4   13.50    1.90
  -3   9   4   15.90    1.80
  -3   9   4   16.30    1.90
  -3   9  -4   18.60    2.20
  -3   9  -4   15.30    1.50
   3   9   4   13.40    1.30
  -3   9  -4   12.50    1.40
   3   9   4   15.60    1.60
   3  -9  -4   14.40    1.80
  -3   9  -4   15.10    1.70
  -3   9  -4   15.60    1.30
  -3   9  -4   16.20    1.80
   3  -9  -4   14.60    1.50
   3   9   4   14.50    1.70
   3   9   4   13.40    1.30
   3  -9  -4   15.90    1.30
   3   9   4   16.80    1.40
   3   9   4   14.40    1.50
  -4   9   4  117.79    5.90
   4  -9   4  117.49    6.00
  -4   9   4  115.49    5.90
   4  -9   4  115.89    6.30
  -4  -9  -4  105.79    6.10
  -4   9   4  111.09    6.20
   4  -9   4   91.29    6.00
  -4  -9  -4  116.09    5.90
   4  -9   4  112.69    6.40
  -4   9  -4  103.19    5.90
   4   9   4  116.99    6.10
  -4   9  -4  122.49    6.40
   4   9   4  102.79    6.10
   4   9   4  117.49    5.90
  -4   9  -4  121.89    6.10
  -4   9  -4  123.39    6.10
   4   9   4  116.49    6.20
   4  -9  -4  113.09    5.90
  -4   9  -4  118.69    5.90
   4   9   4   98.19    5.80
   4  -9  -4   98.39    5.60
   4  -9  -4  108.69    5.90
  -4   9  -4  107.39    6.20
  -5   9   4    4.00    0.60
  -5  -9  -4    4.10    0.70
  -5  -9  -4    3.50    0.60
   5  -9   4    4.90    0.90
   5  -9   4    6.70    1.10
  -5   9   4    4.20    0.80
   5  -9   4    2.00    0.70
  -5   9  -4    3.40    0.80
   5   9   4    3.40    0.60
  -5   9  -4    4.30    0.70
   5  -9  -4    2.50    0.70
   5   9   4    2.00    0.60
   5  -9  -4    3.00    0.50
   5   9   4    3.50    0.80
  -5   9  -4    2.50    0.70
  -5   9  -4    3.30    0.90
  -5   9  -4    4.00    0.70
  -5   9  -4    3.70    0.70
   5   9   4    3.20    0.70
   5   9   4    4.10    0.70
   5  -9  -4    2.80    0.80
  -6  -9  -4    6.60    0.90
  -6   9   4    5.70    0.70
  -6   9   4    6.40    0.90
   6  -9   4    4.30    0.90
   6  -9   4    6.30    0.60
   6  -9   4    5.50    0.70
  -6  -9  -4    5.50    0.60
   6   9   4    5.00    0.80
   6  -9  -4    6.10    0.80
   6   9   4    6.20    0.70
  -6   9  -4    6.50    0.70
   6  -9  -4    6.60    0.70
  -6   9  -4    4.40    0.60
  -6   9  -4    3.90    0.60
  -6   9  -4    3.80    0.60
   6   9   4    7.80    1.00
   6   9   4    7.30    0.90
   0  10   4   10.50    1.20
   0 -10   4    9.60    1.10
   0  10   4   11.00    1.20
   0  10  -4   12.20    1.10
   0  10   4   11.70    1.30
   0 -10  -4   10.80    1.30
   0  10  -4   11.20    1.40
   0  10  -4   13.30    1.50
   0  10   4   11.80    1.60
   0 -10  -4   12.30    1.00
   0  10  -4   10.20    1.40
   0  10   4   10.60    1.20
   0  10   4   12.20    1.30
   0 -10  -4   10.60    1.10
  -1  10   4    1.20    0.50
   1  10  -4    0.50    0.70
  -1 -10  -4    1.10    0.40
   1 -10   4    0.20    0.60
   1  10  -4    0.80    0.80
  -1 -10  -4    1.20    0.60
  -1  10   4    0.60    0.50
  -1  10   4    0.80    0.50
   1  10  -4    1.30    0.50
  -1  10   4    0.90    0.90
   1  10  -4    0.50    0.40
  -1  10   4    0.80    0.50
  -1  10   4    0.60    0.70
  -1  10  -4    1.60    0.60
   1  10   4    2.20    0.80
   1  10   4    0.70    0.70
   1 -10  -4    1.10    0.60
   1  10   4    0.80    0.60
  -1  10  -4    0.40    0.80
   1  10   4    1.10    0.60
   1  10   4    1.40    0.60
   1 -10  -4    0.60    0.60
   1 -10  -4    0.90    0.60
  -1  10  -4    0.10    0.60
  -1  10  -4    1.20    0.50
  -1  10  -4    1.50    1.40
   1 -10  -4    1.10    0.60
   1  10   4    0.90    0.60
  -2  10   4   55.39    3.10
   2 -10   4   47.40    3.30
  -2 -10  -4   49.20    3.30
  -2  10   4   51.29    3.50
  -2 -10  -4   53.59    3.00
  -2 -10  -4   52.89    3.00
  -2  10   4   57.09    3.40
   2 -10   4   52.19    3.10
  -2 -10  -4   47.90    3.40
  -2  10   4   57.79    3.20
  -2  10   4   54.09    3.10
   2 -10  -4   55.79    2.90
  -2  10  -4   54.39    3.10
   2 -10  -4   56.79    3.10
  -2  10  -4   53.09    3.30
   2 -10  -4   55.99    3.20
   2  10   4   54.89    3.10
   2  10   4   54.19    3.30
   2  10   4   49.40    3.10
  -2  10  -4   53.09    3.00
   2  10   4   48.30    3.00
  -2  10  -4   57.19    3.50
  -2  10  -4   55.19    3.30
   2  10   4   51.39    3.30
  -2  10  -4   56.59    3.60
  -3 -10  -4   57.29    3.30
  -3  10   4   60.19    3.30
  -3  10   4   57.99    3.30
  -3  10   4   59.99    3.60
   3 -10   4   59.39    3.50
  -3 -10  -4   50.29    3.40
  -3  10   4   52.59    3.60
  -3  10   4   55.59    3.20
   3 -10  -4   60.69    3.10
  -3  10  -4   59.29    3.70
   3 -10  -4   62.29    3.30
   3 -10  -4   57.49    3.30
   3  10   4   61.39    3.50
   3  10   4   59.89    3.50
  -3  10  -4   61.29    3.80
  -3  10  -4   59.79    3.40
   3  10   4   54.59    3.20
   3  10   4   62.49    3.30
  -3  10  -4   59.09    3.20
   3  10   4   60.49    3.30
  -3  10  -4   57.99    3.40
  -3  10  -4   59.89    3.30
   4 -10   4   41.20    2.60
  -4  10   4   41.20    2.70
  -4  10   4   39.00    2.40
  -4 -10  -4   39.10    2.30
  -4 -10  -4   40.30    2.50
  -4  10   4   38.10    2.40
   4  10   4   46.80    2.70
  -4  10  -4   43.70    2.50
  -4  10  -4   41.90    2.40
   4  10   4   45.90    2.50
   4 -10  -4   44.40    2.50
  -4  10  -4   47.40    2.60
   4  10   4   45.70    2.70
   4 -10  -4   44.00    2.30
  -4  10  -4   38.60    2.70
  -4  10  -4   45.20    2.70
   4  10   4   43.30    2.40
  -4  10  -4   42.50    2.70
   5 -10   4   57.19    2.80
  -5  10   4   54.99    2.80
  -5 -10  -4   50.79    2.80
  -5  10  -4   52.39    2.90
   5 -10  -4   52.19    2.90
   5  10   4   54.89    2.90
  -5  10  -4   49.80    2.90
   5  10   4   54.19    3.00
  -5  10  -4   51.59    2.80
  -5  10  -4   56.59    2.90
   5  10   4   54.39    2.80
   0  11  -4   13.60    1.20
   0  11   4   19.30    1.50
   0 -11  -4   18.00    1.30
   0 -11  -4   18.60    1.20
   0  11  -4   18.10    1.30
   0  11   4   18.40    1.40
   0  11   4   19.50    1.30
   0 -11  -4   16.70    1.50
   0  11  -4   15.90    1.30
   0  11   4   20.60    1.40
   0  11  -4   11.80    1.70
  -1 -11  -4  158.38    7.90
  -1  11   4  167.28    7.90
   1  11  -4  145.49    7.80
  -1 -11  -4  146.09    8.10
  -1 -11  -4  158.88    7.70
  -1  11   4  137.09    7.80
  -1  11   4  162.38    8.00
  -1  11   4  165.78    8.00
  -1  11  -4  156.78    7.90
   1  11   4  168.68    7.90
   1 -11  -4  147.49    7.80
  -1  11  -4  165.38    7.90
  -1  11  -4  144.39    8.10
   1  11   4  172.08    7.90
   1  11   4  171.48    7.90
  -1  11  -4  137.49    7.90
   1  11   4  171.18    8.10
   1 -11  -4  155.78    7.70
  -2  11   4   53.69    3.00
  -2  11   4   53.79    2.90
  -2 -11  -4   52.39    2.80
  -2  11   4   55.99    2.90
  -2  11  -4   47.40    2.90
   2  11   4   52.09    3.00
   2 -11  -4   54.29    2.80
  -2  11  -4   53.49    2.80
   2  11   4   50.19    2.90
  -2  11  -4   51.99    3.00
  -2  11  -4   53.29    2.90
   2  11   4   50.19    2.90
   2  11   4   52.99    2.90
  -3 -11  -4   15.30    1.10
  -3  11   4   17.10    1.20
  -3  11   4   20.00    1.30
  -3  11   4   15.20    1.20
  -3  11  -4   19.30    1.30
   3  11   4   19.40    1.20
   3  11   4   20.90    1.40
   3 -11  -4   19.40    1.10
  -3  11  -4   15.50    1.30
   3  11   4   20.60    1.20
   3 -11  -4   18.70    1.20
  -3  11  -4   19.00    1.20
   0   0  -5    0.20    0.50
   0   0  -5    0.40    0.20
   0   0  -5    0.20    0.60
   0   0   5    0.10    0.30
   0   0  -5    0.50    0.70
   0   0   5    0.40    0.90
   0   0   5    0.80    0.60
   1   0  -5 2018.70  116.09
  -1   0   5 2542.05  116.19
   1   0  -5 2701.33  118.09
  -1   0  -5 2559.14  119.09
  -1   0   5 2576.24  115.99
  -1   0  -5 2386.36  115.99
   1   0  -5 2223.58  115.99
   1   0  -5 2565.14  118.49
  -1   0  -5 2603.54  117.09
  -1   0   5 2045.30  117.29
   1   0   5 2581.14  117.39
   1   0   5 2592.74  118.59
   1   0   5 2265.77  117.69
   1   0   5 2360.96  115.99
  -2   0   5    2.70    1.30
   2   0   5    3.00    1.10
  -2   0   5    2.60    0.80
   2   0  -5    3.30    1.30
   2   0   5    3.00    0.60
  -2   0  -5    2.00    0.70
  -2   0   5    1.60    0.80
   2   0  -5    2.60    1.20
  -2   0   5    3.00    0.60
  -2   0  -5    3.30    1.40
  -2   0  -5    3.10    1.20
   2   0   5    2.20    1.00
   2   0   5    2.70    1.30
  -3   0   5 1377.36   65.79
  -3   0   5 1254.87   66.89
  -3   0   5 1343.07   68.69
   3   0  -5 1480.45   68.79
  -3   0  -5 1431.56   69.49
   3   0  -5 1357.86   67.19
   3   0   5 1394.86   68.79
   3   0   5 1342.17   68.09
  -3   0  -5 1403.36   67.69
   3   0   5 1343.17   67.29
  -3   0  -5 1360.26   66.99
   4   0   5  200.88   13.60
  -4   0  -5  198.68   12.20
   4   0  -5  220.68   13.90
  -4   0   5  204.58   10.50
  -4   0   5  214.38   12.50
  -4   0  -5  215.58   12.70
   4   0  -5  204.58   10.90
  -4   0   5  220.88   10.80
   4   0   5  231.48   13.50
  -4   0  -5  205.18   14.00
  -4   0   5  212.98   13.70
   4   0   5  208.18   12.40
  -5   0  -5  411.36   23.10
   5   0  -5  420.56   24.60
  -5   0  -5  400.96   24.40
  -5   0  -5  358.36   22.50
   5   0  -5  436.46   23.40
  -5   0   5  391.36   22.90
  -5   0   5  459.25   20.90
   5   0   5  416.36   24.40
  -5   0   5  420.06   20.40
   5   0   5  473.85   24.20
   5   0  -5  442.76   21.00
  -5   0  -5  392.06   20.70
  -6   0  -5  372.46   18.50
   6   0  -5  400.76   19.20
   6   0  -5  365.56   19.10
   6   0  -5  389.26   19.10
  -6   0  -5  385.96   18.80
   6   0   5  398.46   19.10
   6   0  -5  364.06   19.00
   6   0  -5  367.36   18.90
  -6   0   5  376.56   19.10
   6   0  -5  357.26   18.90
   6   0  -5  412.56   19.50
  -6   0  -5  383.56   21.90
  -6   0  -5  392.26   18.80
  -6   0   5  409.96   19.30
  -6   0   5  399.46   18.90
   6   0   5  407.06   23.10
   6   0   5  367.36   19.00
  -6   0   5  368.06   18.60
   6   0  -5  366.76   21.90
   7   0  -5 1283.47   62.19
   7   0  -5 1284.87   62.19
   7   0   5 1331.77   62.19
  -7   0   5 1312.27   61.99
   7   0  -5 1266.07   61.99
  -7   0  -5 1240.28   61.49
   7   0  -5 1203.18   61.89
  -7   0   5 1312.67   62.19
  -7   0   5 1372.76   62.49
  -7   0  -5 1276.87   61.79
   7   0  -5 1336.07   62.69
  -7   0  -5 1303.57   61.89
   7   0   5 1293.37   62.09
   7   0  -5 1288.17   62.09
   7   0  -5 1297.57   62.09
  -7   0   5 1209.78   61.69
  -8   0  -5   19.80    1.60
   8   0   5   20.00    1.80
   8   0  -5   21.10    1.90
   8   0  -5   20.80    2.10
  -8   0   5   19.10    2.00
   8   0  -5   19.10    1.90
  -8   0   5   20.00    2.40
  -8   0   5   19.40    1.50
  -8   0  -5   18.70    1.60
   8   0   5   20.70    2.00
  -8   0   5   20.80    1.70
   8   0  -5   20.40    2.30
   8   0  -5   19.20    2.00
   8   0  -5   19.80    1.80
  -9   0  -5  219.98   11.50
   9   0  -5  236.48   11.60
  -9   0   5  226.58   11.50
   9   0   5  207.78   11.70
   9   0  -5  256.67   11.70
   9   0  -5  202.58   11.60
   9   0  -5  250.17   12.20
  -9   0   5  260.17   11.90
   9   0   5  226.28   11.60
  -9   0   5  228.18   11.30
  -9   0  -5  228.08   11.40
   9   0  -5  245.28   11.80
   9   0  -5  207.78   11.70
  10   0  -5   14.10    1.50
 -10   0   5   17.50    1.50
 -10   0   5   16.10    1.10
  10   0   5   16.00    1.40
  10   0  -5   16.60    1.30
 -10   0  -5   15.10    1.20
  10   0  -5   16.20    1.30
 -10   0   5   17.30    1.40
   0   1   5  180.48   10.50
   0   1  -5  196.28   11.60
   0  -1  -5  182.38   11.50
   0   1  -5  193.58   10.90
   0   1   5  167.08    9.60
   0  -1   5  174.98    9.00
   0  -1  -5  180.18   10.20
   0   1  -5  182.68    9.60
   0  -1  -5  191.48    9.80
   0  -1   5  157.78   10.50
   0   1   5  178.08   11.10
   0  -1   5  183.88   11.20
  -1  -1  -5  453.65   22.60
   1  -1   5  443.46   23.20
  -1   1   5  435.86   23.80
  -1   1   5  391.16   21.50
  -1   1   5  473.85   23.20
   1   1  -5  481.65   23.80
   1  -1   5  420.46   21.50
   1   1  -5  434.16   23.80
   1  -1   5  389.06   23.10
  -1  -1  -5  448.36   22.20
  -1   1   5  441.26   22.30
   1  -1   5  452.35   23.70
  -1  -1  -5  461.45   24.50
  -1   1  -5  463.55   24.50
  -1   1  -5  475.75   22.60
   1   1   5  468.15   23.40
   1   1   5  467.75   24.00
  -1  -1   5  383.86   21.40
  -1  -1   5  406.26   23.20
   1  -1  -5  479.05   23.30
   1   1   5  444.16   22.40
   1  -1  -5  411.96   21.80
   1  -1  -5  429.46   23.90
  -1  -1   5  466.45   24.00
  -2  -1  -5  247.48   13.10
   2   1  -5  274.07   15.40
   2   1  -5  241.88   14.70
   2  -1   5  266.97   15.00
  -2  -1  -5  277.77   16.20
   2  -1   5  248.68   13.00
  -2  -1  -5  234.68   13.90
   2  -1   5  245.18   14.70
  -2   1   5  269.67   13.10
   2  -1   5  267.17   15.20
  -2  -1  -5  272.87   14.50
  -2   1   5  267.67   14.10
  -2   1   5  282.17   14.70
  -2   1   5  284.27   15.50
  -2   1  -5  247.08   13.20
  -2   1  -5  260.37   14.30
   2  -1  -5  282.07   15.30
  -2  -1   5  228.48   14.60
  -2  -1   5  266.97   15.60
   2   1   5  267.07   15.70
  -2  -1   5  244.08   12.90
   2  -1  -5  282.97   15.20
   2   1   5  279.27   13.90
   2   1   5  246.38   14.90
  -2   1  -5  300.07   16.50
   3  -1   5  774.62   39.90
  -3  -1  -5  874.41   41.80
  -3  -1  -5  777.92   41.20
   3  -1   5  782.82   41.90
  -3  -1  -5  751.42   39.80
   3   1  -5  873.61   42.80
  -3   1   5  810.52   41.70
   3  -1   5  703.03   41.80
  -3   1   5  875.91   41.50
  -3   1   5  893.21   42.80
  -3   1   5  803.92   39.90
   3  -1   5  831.92   42.40
  -3  -1  -5  851.61   43.60
   3   1   5  904.31   42.60
  -3   1  -5  842.32   41.60
   3  -1  -5  786.82   41.60
  -3   1  -5  812.72   40.80
  -3   1  -5  859.71   43.70
   3   1   5  893.91   43.40
  -3  -1   5  830.12   39.80
  -3  -1   5  786.02   42.10
  -3  -1   5  903.21   43.40
   3  -1  -5  786.52   42.40
   4  -1   5   31.00    3.80
   4  -1   5   28.20    2.20
   4  -1   5   28.10    1.90
   4   1  -5   20.50    3.80
  -4  -1  -5   28.90    2.20
  -4   1   5   31.80    3.40
  -4  -1  -5   29.60    4.40
  -4   1   5   32.80    4.00
  -4   1   5   29.00    3.30
  -4   1   5   31.20    1.90
  -4  -1  -5   28.70    3.30
   4   1  -5   43.20    4.30
   4  -1   5   33.00    4.00
   4  -1   5   31.80    3.80
  -4  -1  -5   29.60    2.30
  -4  -1  -5   34.20    3.80
  -4   1   5   34.00    2.20
   4   1  -5   31.40    2.30
  -4  -1  -5   30.20    1.90
   4   1   5   32.10    3.80
  -4   1  -5   27.60    3.10
  -4   1  -5   31.40    4.30
  -4  -1   5   29.50    4.30
  -4  -1   5   25.90    3.10
  -4   1  -5   27.80    2.10
  -4   1  -5   34.00    3.50
  -4  -1   5   32.40    2.10
   4  -1  -5   28.60    4.10
   4   1   5   34.60    4.50
  -4  -1   5   27.00    1.90
   4  -1  -5   30.60    2.20
   5   1  -5  263.57   12.90
  -5   1   5  240.98   12.70
  -5  -1  -5  245.78   12.60
   5   1  -5  239.68   16.10
  -5  -1  -5  257.27   12.30
  -5   1   5  232.68   14.70
   5   1  -5  257.07   15.50
   5  -1   5  217.38   14.90
  -5   1   5  244.98   15.00
  -5  -1  -5  264.87   15.30
  -5   1   5  264.07   12.40
  -5  -1  -5  238.78   14.90
   5  -1   5  253.87   15.40
  -5   1   5  237.88   15.60
   5   1   5  274.77   16.00
  -5  -1   5  233.98   16.30
  -5   1  -5  234.58   12.50
   5  -1  -5  245.28   12.90
   5   1   5  249.88   16.60
  -5  -1   5  253.77   12.30
   5  -1  -5  249.28   16.30
  -5   1  -5  224.98   16.00
  -5  -1   5  257.67   12.60
  -5   1  -5  263.27   15.00
  -6   1   5   35.20    2.20
  -6   1   5   35.40    2.70
   6   1  -5   27.60    2.20
   6  -1   5   29.70    2.40
  -6  -1  -5   32.90    2.10
   6  -1   5   29.50    2.30
   6   1  -5   28.10    2.30
   6  -1   5   31.30    4.70
  -6   1   5   30.00    2.30
   6   1  -5   34.00    2.60
  -6  -1  -5   31.00    1.90
   6   1  -5   29.20    2.30
  -6  -1  -5   29.70    4.30
   6  -1   5   28.90    2.20
   6   1  -5   32.20    2.20
   6   1  -5   30.40    2.40
   6   1  -5   30.00    2.20
   6   1  -5   32.70    2.20
   6   1  -5   28.00    4.20
  -6   1   5   29.40    2.00
  -6  -1  -5   29.80    2.00
  -6   1  -5   29.80    2.10
   6  -1  -5   28.50    2.20
   6  -1  -5   33.40    2.70
  -6  -1   5   34.20    2.20
   6   1   5   31.50    4.60
   6  -1  -5   29.00    2.40
  -6   1  -5   29.00    3.90
   6  -1  -5   31.50    2.30
  -6  -1   5   26.30    2.00
   6   1   5   33.40    2.10
  -6   1  -5   30.50    2.20
   6   1   5   32.60    2.40
   6   1   5   31.90    2.30
   6  -1  -5   26.00    2.10
   6  -1  -5   29.90    2.40
  -6  -1   5   29.30    2.40
   7  -1   5    0.00    0.70
   7   1  -5    1.30    0.80
  -7  -1  -5    0.80    0.70
  -7  -1  -5    2.80    0.70
  -7  -1  -5    1.80    0.70
  -7  -1  -5    1.40    0.70
   7   1  -5    1.40    1.00
  -7   1   5    2.10    0.90
   7   1  -5    2.20    0.70
   7   1  -5    0.90    0.60
   7  -1   5    1.30    0.70
  -7   1   5    4.10    0.90
   7  -1   5    2.20    0.90
   7   1  -5    4.30    1.20
  -7   1   5    1.70    1.10
  -7   1   5    3.20    0.70
   7   1  -5    1.40    0.70
  -7  -1   5    1.10    0.70
  -7  -1   5    1.90    0.90
   7  -1  -5    0.90    0.80
   7  -1  -5    1.20    0.70
   7  -1  -5    1.00    0.60
   7  -1  -5    1.40    0.80
  -7  -1   5    2.10    1.00
  -7   1  -5    1.30    0.70
   7  -1  -5    1.50    0.80
   7   1   5    1.90    0.90
   7  -1  -5    1.50    0.70
  -7   1  -5   -0.30    0.60
   7   1   5    2.40    0.90
  -7  -1   5    1.20    0.60
  -8   1   5   66.89    3.60
   8   1  -5   62.79    4.00
   8   1  -5   66.79    4.00
  -8  -1  -5   68.49    3.50
  -8   1   5   61.59    3.80
   8  -1   5   62.89    3.90
   8   1  -5   64.19    3.90
   8   1  -5   68.09    4.40
   8   1  -5   65.59    4.10
  -8  -1  -5   67.49    3.80
  -8   1   5   64.59    4.10
   8  -1   5   65.39    4.10
   8   1  -5   68.79    4.10
   8   1  -5   62.29    3.90
  -8  -1  -5   66.49    3.70
  -8   1  -5   65.09    3.70
   8  -1  -5   68.69    4.10
  -8   1  -5   67.69    3.80
   8  -1  -5   63.89    4.00
  -8  -1   5   66.39    4.40
  -8  -1   5   61.99    3.60
   8  -1  -5   68.29    4.00
  -8  -1   5   64.39    4.00
   8  -1  -5   64.29    3.90
   8  -1  -5   59.49    4.30
   8   1   5   69.49    4.00
  -8  -1   5   60.39    3.80
   8   1   5   68.19    4.10
   9   1  -5  159.48    8.70
  -9   1   5  173.08    8.20
   9  -1   5  159.48    8.50
   9   1  -5  155.18    8.60
  -9  -1  -5  156.08    8.30
  -9  -1  -5  148.29    8.40
   9   1  -5  172.98    8.60
   9  -1   5  162.58    8.70
  -9   1   5  175.58    8.80
   9   1  -5  167.48    8.70
  -9   1   5  177.38    8.80
   9   1  -5  161.88    8.50
   9   1  -5  172.88    9.00
  -9   1  -5  161.68    8.50
   9   1   5  178.98    8.70
  -9  -1   5  178.58    8.60
  -9   1  -5  164.48    8.40
   9  -1  -5  171.08    9.10
  -9  -1   5  149.88    8.30
  -9  -1   5  179.08    8.80
  -9  -1   5  150.48    8.90
   9  -1  -5  163.38    8.60
   9  -1  -5  174.78    8.60
   9   1   5  171.38    8.70
  10   1  -5   42.80    3.00
  10   1  -5   52.99    2.90
 -10  -1  -5   49.99    2.80
  10   1  -5   48.90    2.90
 -10   1   5   50.49    2.90
 -10   1   5   45.90    2.90
  10  -1   5   53.29    2.90
  10  -1  -5   45.60    3.10
  10   1   5   49.50    2.90
 -10  -1   5   48.30    2.90
 -10  -1   5   52.39    2.60
 -10  -1   5   50.49    3.00
  10  -1  -5   48.90    2.90
  10   1   5   51.09    3.00
 -10   1  -5   44.40    2.80
   0   2  -5  460.45   23.70
   0   2   5  474.15   25.40
   0   2   5  482.65   24.50
   0  -2  -5  493.65   26.20
   0  -2   5  515.55   25.40
   0   2  -5  469.75   25.80
   0  -2   5  422.76   22.80
   0  -2  -5  430.16   23.10
   0  -2   5  515.65   25.10
   0  -2  -5  479.95   24.00
   0   2   5  455.75   24.10
  -1  -2  -5  670.13   36.90
   1  -2   5  754.02   39.20
  -1   2   5  803.12   39.50
   1  -2   5  742.23   36.90
   1  -2   5  830.52   39.20
  -1   2   5  788.62   38.40
  -1   2   5  806.12   38.40
   1  -2   5  758.22   39.20
  -1  -2  -5  762.32   38.30
   1   2  -5  713.83   37.30
   1   2  -5  789.42   39.40
   1   2  -5  797.72   39.70
  -1  -2  -5  842.32   40.70
   1   2   5  759.72   38.20
   1  -2  -5  770.32   40.00
   1   2   5  779.12   39.70
   1  -2  -5  702.33   37.70
  -1  -2   5  821.22   39.70
  -1   2  -5  806.12   40.40
  -1  -2   5  687.93   36.70
   1  -2  -5  712.63   38.40
   1   2   5  759.62   38.80
  -1   2  -5  797.72   38.20
  -2   2   5  560.24   28.60
  -2  -2  -5  617.64   31.10
  -2   2   5  495.55   27.10
   2  -2   5  603.24   29.40
  -2   2   5  607.94   29.80
  -2  -2  -5  557.84   28.70
   2  -2   5  606.34   29.40
   2   2  -5  496.85   29.40
  -2  -2  -5  541.85   27.10
   2  -2   5  576.94   29.60
   2   2  -5  563.14   29.30
   2  -2   5  556.24   27.10
  -2  -2  -5  579.84   28.90
  -2   2   5  510.65   28.30
   2   2   5  587.54   29.30
  -2  -2   5  491.95   26.80
  -2   2  -5  585.24   28.70
  -2  -2   5  523.25   29.20
   2   2   5  564.34   30.10
  -2  -2   5  615.74   30.30
   2  -2  -5  567.44   29.20
  -2   2  -5  597.24   30.80
   2  -2  -5  497.55   29.60
   2  -2  -5  516.25   27.50
   3   2  -5   99.59    8.10
   3  -2   5   93.89    5.60
   3  -2   5  121.79    8.00
  -3   2   5  108.69    7.00
  -3  -2  -5  119.39    9.10
  -3  -2  -5  112.09    7.50
  -3  -2  -5  110.99    5.60
   3   2  -5  105.09    6.00
  -3   2   5  109.99    7.40
  -3   2   5  100.19    5.80
   3  -2   5  115.19    5.90
  -3  -2  -5  113.39    5.90
  -3   2   5  102.09    7.80
   3  -2   5  107.39    8.00
  -3  -2  -5  103.29    7.30
   3   2   5   98.89    7.70
   3  -2  -5   93.69    7.60
   3  -2  -5  124.69    8.40
   3   2   5  124.09    9.00
  -3   2  -5  117.59    7.60
  -3  -2   5  113.09    5.70
  -3  -2   5  115.89    8.70
  -3   2  -5  118.59    9.10
  -4  -2  -5  660.73   35.50
   4  -2   5  760.62   36.20
   4  -2   5  680.13   33.30
  -4   2   5  621.24   33.20
  -4  -2  -5  730.83   33.30
  -4  -2  -5  633.04   33.20
  -4   2   5  650.43   32.90
  -4  -2  -5  688.43   35.60
   4  -2   5  656.23   33.00
   4   2  -5  695.63   36.80
  -4  -2  -5  706.83   33.00
   4  -2   5  662.63   36.30
  -4   2   5  685.33   35.70
  -4   2   5  644.74   35.80
   4   2  -5  731.33   36.30
   4   2  -5  676.13   33.40
  -4  -2  -5  657.23   37.10
   4   2   5  729.23   36.40
   4  -2  -5  678.63   33.40
   4  -2  -5  680.73   36.50
  -4   2  -5  643.84   33.20
  -4   2  -5  681.13   37.50
  -4  -2   5  697.13   33.10
   4   2   5  677.13   37.20
  -4   2  -5  645.04   33.50
  -4   2  -5  708.83   35.60
  -4  -2   5  795.52   37.90
   5  -2   5  137.39   11.20
   5  -2   5  151.58    8.20
  -5  -2  -5  149.29   10.90
  -5   2   5  159.18   11.10
   5   2  -5  157.48   11.50
   5   2  -5  160.28   11.90
  -5   2   5  155.38    8.20
  -5  -2  -5  178.38    8.70
   5   2  -5  172.08    8.90
   5   2  -5  161.68    8.50
  -5  -2  -5  167.88   11.10
  -5  -2  -5  173.78    8.30
   5  -2   5  154.28   10.90
   5   2  -5  173.68    8.90
  -5   2   5  162.48    8.30
   5   2  -5  180.78    8.90
   5   2   5  158.98   12.50
  -5  -2   5  154.88    8.20
   5  -2  -5  134.69   11.80
   5   2   5  177.08   11.90
  -5   2  -5  158.48    8.60
  -5   2  -5  169.38    8.50
   5  -2  -5  162.88    8.80
  -5  -2   5  176.78    8.60
   5   2   5  160.38    8.60
  -5   2  -5  156.48   12.50
   5  -2  -5  164.18    8.90
  -5   2  -5  168.38   11.00
   5  -2  -5  164.48    8.50
  -6  -2  -5  230.08   11.10
   6  -2   5  195.98   11.20
   6   2  -5  200.38   14.50
   6   2  -5  193.38   11.10
   6   2  -5  211.98   11.40
  -6  -2  -5  217.58   11.00
   6  -2   5  213.58   11.20
   6   2  -5  229.78   11.20
   6   2  -5  237.38   11.40
   6  -2   5  203.58   11.50
   6   2  -5  213.08   11.20
   6   2  -5  230.78   11.70
  -6   2   5  225.38   11.40
  -6   2   5  226.28   10.80
   6   2  -5  225.88   11.30
  -6  -2  -5  220.28   10.80
  -6   2   5  222.18   11.00
   6   2  -5  214.58   11.30
  -6  -2  -5  225.58   11.50
  -6  -2   5  217.38   11.40
   6  -2  -5  227.18   11.30
  -6   2  -5  199.58   13.90
   6   2   5  206.88   11.10
  -6  -2   5  238.88   11.10
  -6   2  -5  221.28   11.00
   6   2   5  213.08   11.30
   6   2   5  224.08   15.00
   6  -2  -5  215.68   11.20
   6   2   5  224.18   11.30
  -6   2  -5  220.88   11.00
   6  -2  -5  235.88   11.80
   6   2   5  214.78   11.30
   6   2   5  220.08   11.00
   7   2  -5  496.15   24.00
  -7   2   5  498.05   24.30
   7   2  -5  482.65   24.20
  -7  -2  -5  507.85   23.90
   7   2  -5  477.55   24.00
   7   2  -5  513.25   24.50
   7   2  -5  508.75   24.20
   7  -2   5  459.15   24.30
   7   2  -5  442.16   23.90
  -7   2   5  479.95   24.20
   7  -2   5  497.05   24.10
  -7  -2  -5  511.15   23.60
  -7   2   5  506.25   23.60
   7   2  -5  510.95   24.10
  -7  -2  -5  498.45   23.80
   7  -2   5  497.05   24.00
   7   2  -5  474.85   24.00
   7   2   5  455.75   24.00
  -7   2  -5  481.65   23.80
   7  -2  -5  465.25   24.50
  -7  -2   5  497.35   23.90
   7   2   5  501.15   24.10
   7   2   5  503.95   23.90
  -7   2  -5  496.55   23.90
   7  -2  -5  511.25   24.10
  -7  -2   5  467.35   24.20
   7   2   5  492.15   24.20
  -7  -2   5  453.65   23.60
   7   2   5  479.05   24.00
   7  -2  -5  453.25   23.90
  -8   2   5   77.99    4.70
   8   2  -5   72.49    4.50
  -8  -2  -5   77.39    4.40
   8   2  -5   80.89    4.60
  -8  -2  -5   75.59    4.30
   8   2  -5   73.59    4.60
   8  -2   5   73.29    4.50
  -8   2   5   81.19    4.70
  -8  -2  -5   77.39    4.10
   8  -2   5   76.39    4.50
   8   2  -5   77.19    4.80
  -8   2   5   76.29    4.00
   8   2  -5   76.39    4.60
  -8  -2  -5   75.39    4.20
   8   2  -5   77.19    4.50
  -8   2  -5   80.69    4.40
   8   2   5   72.39    4.50
   8  -2  -5   80.59    4.50
   8  -2  -5   77.89    4.50
  -8  -2   5   75.39    4.70
  -8  -2   5   73.49    4.10
   8  -2  -5   75.79    4.90
   8   2   5   76.89    4.40
   8   2   5   81.29    4.60
  -8  -2   5   75.19    4.50
  -8  -2   5   71.39    4.30
  -8   2  -5   77.99    4.30
  -9   2   5   15.60    1.80
  -9  -2  -5   11.50    1.20
  -9   2   5   14.40    1.50
   9  -2   5   16.30    1.70
   9  -2   5   13.90    1.30
  -9  -2  -5   15.00    1.00
   9   2  -5   12.00    1.30
   9   2  -5   14.60    1.60
   9   2  -5   13.90    1.40
   9   2  -5   15.20    1.70
   9   2  -5   11.00    1.70
   9   2  -5   12.30    1.70
  -9   2  -5   14.30    1.20
   9  -2  -5   14.60    1.70
   9   2   5   12.30    1.40
   9   2   5   13.90    1.30
  -9  -2   5   14.00    1.10
  -9  -2   5   13.60    1.60
  -9   2  -5   14.30    1.30
  -9  -2   5   14.30    1.50
  -9  -2   5   10.80    1.60
   9   2   5   12.90    1.60
   9  -2  -5   14.50    1.40
   9  -2  -5   13.30    1.40
  10   2  -5   43.90    2.60
  10  -2   5   40.70    2.40
  10   2  -5   44.60    2.60
  10   2  -5   41.00    2.60
  10  -2   5   46.30    2.60
 -10   2   5   43.30    2.60
 -10   2   5   42.00    2.60
 -10  -2  -5   46.90    2.60
  10   2  -5   44.20    2.60
  10  -2  -5   46.80    2.60
 -10   2  -5   45.10    2.60
  10   2   5   39.30    2.50
  10  -2  -5   40.70    2.50
  10  -2  -5   39.40    2.80
 -10  -2   5   41.50    2.50
 -10  -2   5   46.90    2.40
  10   2   5   45.20    2.60
   0   3  -5 2225.28  108.49
   0  -3   5 2331.27  110.29
   0  -3  -5 2350.36  111.59
   0  -3  -5 2141.39  107.49
   0   3   5 2347.36  108.99
   0   3   5 2306.27  109.29
   0  -3  -5 2235.88  108.89
   0   3   5 2201.28  110.09
   0  -3   5 2029.70  107.19
   0  -3   5 2205.58  109.59
   0   3  -5 2424.26  111.39
   0  -3   5 2193.68  109.79
   1   3  -5  776.82   39.00
  -1  -3  -5  808.72   38.00
  -1  -3  -5  788.42   40.40
   1   3  -5  755.12   39.40
  -1   3   5  701.73   38.40
  -1   3   5  730.83   37.90
  -1  -3  -5  781.82   36.20
   1  -3   5  734.33   38.30
   1  -3   5  726.93   38.20
   1  -3   5  737.13   36.10
   1   3  -5  720.03   36.80
   1  -3   5  801.62   39.20
   1  -3  -5  767.42   39.90
  -1   3  -5  792.82   37.70
   1  -3  -5  692.43   37.40
   1   3   5  736.43   37.90
   1   3   5  787.22   38.20
   1  -3  -5  708.73   36.10
   1  -3  -5  686.03   37.30
   1   3   5  801.82   39.30
  -1   3  -5  718.43   39.70
  -1  -3   5  735.33   38.40
  -1  -3   5  726.23   38.70
  -2  -3  -5  568.84   30.40
   2   3  -5  528.05   28.70
  -2  -3  -5  557.24   26.10
   2  -3   5  550.34   28.20
   2   3  -5  493.15   26.50
   2   3  -5  559.34   29.10
   2  -3   5  572.54   29.20
  -2  -3  -5  554.14   28.10
  -2  -3  -5  525.35   28.10
  -2   3   5  544.95   28.10
   2  -3   5  523.95   26.00
   2  -3  -5  523.65   27.00
  -2   3  -5  472.75   26.30
  -2   3  -5  549.65   27.90
   2  -3  -5  527.75   29.40
   2   3   5  545.35   29.50
   2  -3  -5  479.05   26.00
  -2   3  -5  560.94   30.30
   2   3   5  552.94   28.30
  -2  -3   5  534.35   28.60
   2  -3  -5  492.15   27.90
  -2  -3   5  572.14   29.40
   3   3  -5  504.85   27.40
  -3   3   5  491.05   26.40
  -3  -3  -5  511.45   28.50
   3   3  -5  489.95   24.30
  -3  -3  -5  518.95   26.70
   3  -3   5  537.65   26.60
  -3  -3  -5  469.95   24.20
  -3  -3  -5  420.46   26.00
  -3  -3  -5  513.75   24.20
   3  -3   5  538.65   27.70
   3  -3   5  529.85   24.20
  -3  -3  -5  481.15   23.90
   3  -3   5  492.75   23.90
   3  -3  -5  418.36   26.80
  -3  -3   5  513.35   27.20
   3  -3  -5  488.25   26.80
  -3  -3   5  446.56   23.70
   3   3   5  503.75   26.70
   3   3   5  476.05   27.80
  -3   3  -5  522.75   28.80
  -3   3  -5  475.05   24.20
  -3  -3   5  480.45   27.70
  -3   3  -5  486.65   24.40
  -3   3  -5  534.45   26.40
  -4  -3  -5  767.82   39.50
   4   3  -5  783.62   37.00
  -4  -3  -5  652.23   39.20
   4   3  -5  764.22   40.60
  -4  -3  -5  764.52   36.50
   4  -3   5  751.92   36.50
   4  -3   5  762.82   40.60
  -4  -3  -5  805.72   36.90
  -4  -3  -5  714.53   36.80
   4   3  -5  833.22   40.30
   4  -3   5  723.63   36.80
   4   3   5  759.72   41.40
  -4   3  -5  791.82   37.20
   4   3   5  793.32   40.10
  -4  -3   5  751.22   36.50
  -4   3  -5  810.42   39.50
  -4  -3   5  653.93   40.50
  -4   3  -5  783.02   36.90
  -4   3  -5  734.63   41.60
   4  -3  -5  744.73   36.90
   5  -3   5   45.80    3.10
   5  -3   5   49.80    2.90
   5   3  -5   44.20    2.90
   5   3  -5   47.80    3.00
   5   3  -5   47.30    3.00
   5   3  -5   49.99    3.20
  -5  -3  -5   45.40    2.70
  -5  -3  -5   52.59    3.30
   5   3  -5   51.79    3.10
   5   3  -5   50.79    3.20
  -5   3   5   43.70    2.60
   5   3  -5   45.80    5.30
  -5  -3  -5   53.29    3.00
  -5   3   5   48.20    3.10
  -5   3   5   51.49    3.30
  -5  -3  -5   50.29    5.10
   5  -3   5   47.20    3.20
   5   3  -5   49.60    3.30
   5   3   5   51.99    5.70
  -5   3  -5   40.90    5.00
   5   3   5   43.90    3.00
   5   3   5   36.60    3.10
  -5   3  -5   45.50    2.90
   5  -3  -5   41.70    3.30
   5  -3  -5   48.50    3.10
  -5  -3   5   46.50    3.00
   5   3   5   46.20    3.10
  -5   3  -5   45.70    2.80
   5   3   5   47.40    3.20
  -5   3  -5   47.40    3.30
  -5   3  -5   48.80    3.10
  -5   3  -5   52.89    3.70
   5   3   5   48.90    3.20
  -5   3  -5   47.00    2.90
   5   3   5   49.80    2.90
   5  -3  -5   44.40    2.90
   5  -3  -5   46.30    3.30
   5   3   5   50.29    2.90
   6   3  -5  260.67   13.50
   6   3  -5  269.47   13.40
   6  -3   5  272.37   13.50
  -6  -3  -5  244.98   16.40
   6  -3   5  264.97   13.90
   6   3  -5  264.87   13.50
   6  -3   5  280.27   13.50
  -6  -3  -5  268.67   13.60
  -6   3   5  273.47   13.60
   6   3  -5  271.77   13.50
  -6  -3  -5  257.17   13.00
   6   3  -5  278.97   13.80
   6   3  -5  236.68   16.80
  -6  -3  -5  269.17   13.20
   6   3  -5  274.77   13.50
  -6   3   5  265.47   13.50
  -6   3   5  252.97   12.90
  -6  -3  -5  269.87   13.20
   6  -3  -5  257.17   13.30
   6   3   5  272.57   13.50
   6   3   5  227.08   16.90
  -6   3  -5  255.57   13.20
   6   3   5  264.77   13.50
   6   3   5  251.37   13.30
  -6  -3   5  288.07   13.50
   6   3   5  254.07   13.20
   6  -3  -5  271.27   13.50
   6   3   5  265.67   13.40
  -6   3  -5  250.67   16.30
   6   3   5  257.17   13.30
   6  -3  -5  279.17   13.90
  -6  -3   5  258.07   13.10
  -6   3  -5  254.87   13.20
  -7  -3  -5    8.20    1.10
   7   3  -5    8.30    1.20
   7   3  -5    8.40    1.30
   7   3  -5    7.90    1.30
  -7   3   5    9.00    1.30
  -7  -3  -5    7.70    1.40
   7  -3   5    7.40    1.20
   7   3  -5    7.00    1.20
   7   3  -5    8.50    1.40
   7  -3   5    8.50    1.40
   7  -3   5    8.50    1.30
  -7   3   5   11.20    1.40
   7   3  -5    9.30    1.50
   7   3  -5    8.20    1.20
  -7  -3  -5    7.60    1.10
  -7  -3  -5    6.10    0.90
  -7  -3   5    6.80    1.00
   7   3   5    9.50    1.30
   7   3   5    9.10    1.10
   7  -3  -5    9.00    1.50
   7   3   5    8.80    1.20
  -7  -3   5    7.30    1.30
  -7   3  -5    8.40    1.10
  -7   3  -5    6.80    1.10
   7  -3  -5   11.40    1.30
   7   3   5    7.30    1.20
   7  -3  -5   10.00    1.30
   7   3   5    9.40    1.30
   8   3  -5  319.97   16.80
  -8  -3  -5  334.97   16.30
   8  -3   5  323.87   16.50
   8   3  -5  310.67   16.60
  -8   3   5  350.96   16.80
  -8  -3  -5  311.67   16.10
   8   3  -5  332.27   16.70
   8   3  -5  294.47   16.50
   8  -3   5  309.47   16.80
   8   3  -5  339.57   16.60
   8  -3   5  338.87   16.60
   8   3  -5  346.87   16.60
  -8  -3  -5  332.47   16.40
  -8   3   5  344.07   16.70
   8   3   5  334.17   16.50
  -8  -3   5  333.97   16.40
   8   3   5  350.96   16.60
   8  -3  -5  333.77   16.50
   8  -3  -5  338.77   17.00
   8   3   5  315.77   16.50
   8   3   5  347.77   16.70
  -8  -3   5  302.77   16.10
   8  -3  -5  346.57   16.60
  -8   3  -5  346.17   16.40
  -8  -3   5  333.47   16.80
  -8   3  -5  331.47   16.40
   9  -3   5   76.99    4.20
  -9  -3  -5   72.79    4.10
  -9  -3  -5   74.89    3.90
   9   3  -5   71.79    4.30
  -9   3   5   73.29    4.30
  -9   3   5   78.79    4.40
   9   3  -5   77.49    4.20
   9   3  -5   77.29    4.40
   9   3  -5   76.09    4.30
   9   3  -5   76.99    4.20
   9  -3   5   73.19    4.20
   9   3   5   71.29    4.10
   9  -3  -5   76.89    4.20
  -9  -3   5   76.49    4.20
  -9  -3   5   68.99    4.20
  -9  -3   5   63.39    4.30
  -9   3  -5   71.59    4.10
   9   3   5   74.69    4.20
  -9  -3   5   80.09    4.00
   9  -3  -5   76.89    4.20
   9   3   5   74.39    4.30
   9  -3  -5   74.59    4.60
  10   3  -5   71.09    3.70
  10   3  -5   72.59    3.80
 -10  -3  -5   75.69    3.70
  10   3  -5   65.29    3.70
  10  -3   5   64.89    3.70
 -10   3   5   59.09    3.60
  10   3  -5   69.29    3.80
 -10  -3  -5   63.39    3.70
  10  -3   5   69.79    3.70
 -10   3   5   71.69    3.80
  10   3  -5   70.99    3.80
 -10  -3   5   74.19    3.60
  10   3   5   80.19    3.80
  10   3   5   66.49    3.70
  10  -3  -5   73.89    3.70
  10  -3  -5   58.29    3.60
 -10   3  -5   74.19    3.70
   0   4   5  158.58   10.00
   0   4   5  136.29    7.50
   0  -4  -5  148.79    7.50
   0  -4   5  118.99    9.10
   0   4  -5  145.19   10.90
   0   4  -5  137.99    7.50
   0   4  -5  134.79    7.60
   0  -4  -5  141.19   11.00
   0  -4   5  146.19   10.10
   0  -4  -5  147.59    9.20
   0  -4  -5  140.89    7.20
   0   4   5  140.79    9.40
   0   4  -5  141.79    8.70
   0  -4   5  135.99    7.00
   0  -4   5  150.18    9.50
   1  -4   5  587.74   28.60
   1   4  -5  600.14   32.50
  -1  -4  -5  614.84   33.50
  -1  -4  -5  550.34   28.60
   1  -4   5  603.64   32.10
  -1   4   5  558.54   31.10
  -1  -4  -5  662.63   31.20
  -1  -4  -5  620.44   28.90
  -1   4   5  578.94   31.20
   1  -4   5  584.94   30.90
  -1   4   5  564.74   28.90
   1   4  -5  581.44   29.90
   1   4  -5  613.94   29.10
   1   4   5  592.34   31.20
   1   4   5  646.94   29.10
  -1   4  -5  511.95   32.70
   1  -4  -5  620.34   33.50
  -1   4  -5  601.74   30.60
   1   4   5  585.74   30.40
   1  -4  -5  630.74   30.60
  -1  -4   5  543.35   31.40
   1   4   5  596.54   32.00
  -1   4  -5  562.84   29.10
  -1  -4   5  526.75   31.60
  -1  -4   5  630.74   31.50
   1  -4  -5  590.74   28.60
  -1   4  -5  597.94   28.90
   1  -4  -5  615.04   28.90
  -2   4   5  578.14   30.70
  -2   4   5  534.25   28.10
   2   4  -5  577.94   31.40
  -2  -4  -5  567.64   30.70
   2  -4   5  618.44   28.10
  -2  -4  -5  603.44   28.30
  -2  -4  -5  642.34   28.20
  -2  -4  -5  576.44   27.90
  -2  -4  -5  615.84   30.70
   2   4  -5  544.35   28.30
   2   4  -5  556.94   31.20
  -2  -4  -5  575.14   32.80
   2  -4   5  530.85   27.80
   2  -4   5  571.34   31.50
   2  -4   5  588.84   30.20
   2  -4  -5  611.34   28.20
   2   4   5  610.44   30.30
  -2  -4   5  574.24   30.90
   2  -4  -5  607.64   29.80
   2  -4  -5  546.85   27.80
   2  -4  -5  586.74   32.50
  -2   4  -5  493.35   29.90
  -2   4  -5  505.85   32.30
  -2   4  -5  568.74   28.20
   2   4   5  617.84   32.10
  -2   4  -5  566.64   28.40
  -2  -4   5  581.44   31.60
   3   4  -5  742.53   34.30
   3   4  -5  706.03   37.50
   3  -4   5  669.73   37.70
  -3  -4  -5  724.83   34.10
   3  -4   5  736.93   34.00
   3  -4   5  709.83   33.80
  -3  -4  -5  674.23   33.70
  -3  -4  -5  698.23   39.00
  -3   4   5  601.34   33.90
  -3   4   5  682.53   36.80
  -3  -4  -5  714.13   34.10
  -3  -4  -5  746.83   36.90
  -3  -4  -5  711.93   37.10
  -3   4  -5  679.23   34.10
   3  -4  -5  689.23   33.70
  -3   4  -5  664.03   34.30
   3  -4  -5  665.43   36.60
   3  -4  -5  630.24   37.70
  -3   4  -5  743.23   36.60
   3   4   5  755.22   37.00
   3   4   5  696.83   38.30
  -3   4  -5  711.53   39.30
  -3  -4   5  717.63   38.20
   4   4  -5  387.86   18.20
  -4   4   5  358.46   17.90
  -4  -4  -5  354.06   17.90
   4   4  -5  340.17   17.80
  -4   4   5  322.67   17.80
  -4  -4  -5  298.87   21.70
   4  -4   5  365.96   17.70
  -4  -4  -5  350.36   17.90
   4   4  -5  355.36   17.70
  -4  -4  -5  382.16   17.70
   4  -4   5  413.06   18.10
  -4  -4  -5  378.46   20.90
   4   4  -5  347.37   17.80
   4   4  -5  356.66   17.80
  -4   4   5  297.37   21.60
   4   4   5  353.26   17.60
   4  -4  -5  362.76   18.00
   4   4   5  346.97   17.90
   4   4   5  367.66   18.40
   4  -4  -5  347.37   17.80
  -4   4  -5  352.86   17.60
  -4   4  -5  370.26   17.90
  -4   4  -5  389.26   18.10
  -4   4  -5  375.16   18.40
  -4   4  -5  371.16   20.60
   4   4   5  377.86   21.20
   4  -4  -5  354.16   17.60
   4   4   5  358.76   17.60
  -4   4  -5  354.76   17.70
   4   4   5  345.67   17.80
  -5  -4  -5   22.10    1.70
  -5  -4  -5   22.90    2.10
  -5   4   5   22.00    2.10
   5   4  -5   22.50    1.90
   5   4  -5   19.40    3.90
  -5  -4  -5   19.90    1.60
   5   4  -5   21.50    2.00
   5   4  -5   21.80    2.00
   5  -4   5   21.30    1.80
   5   4  -5   22.90    1.80
   5   4  -5   24.60    2.10
  -5  -4  -5   16.60    3.40
   5   4  -5   21.40    1.90
  -5   4   5   20.40    2.00
   5  -4   5   21.10    1.90
   5   4  -5   22.90    2.20
   5  -4   5   20.40    2.10
   5   4   5   20.10    1.90
  -5   4  -5   20.40    1.90
  -5   4  -5   21.50    1.80
   5  -4  -5   21.20    2.00
   5   4   5   22.80    1.70
   5   4   5   21.50    1.80
  -5   4  -5   17.70    3.50
  -5   4  -5   19.30    1.60
   5   4   5   22.20    1.90
   5  -4  -5   23.10    2.00
  -5   4  -5   19.80    1.90
  -5   4  -5   22.30    2.20
   5   4   5   26.50    2.00
   5  -4  -5   22.20    1.80
  -5   4  -5   22.70    2.30
  -5   4  -5   20.50    1.60
   5   4   5   23.00    1.80
   5   4   5   23.00    4.30
  -5  -4   5   22.60    1.70
  -6  -4  -5  400.76   19.80
   6   4  -5  420.46   19.60
   6   4  -5  384.46   19.50
   6   4  -5  413.06   19.70
  -6  -4  -5  374.26   19.30
   6  -4   5  394.46   20.00
   6  -4   5  372.26   19.20
  -6   4   5  402.06   19.70
  -6   4   5  358.76   19.50
   6  -4   5  392.26   19.40
   6   4  -5  403.86   19.50
  -6  -4  -5  393.36   19.10
   6   4  -5  393.96   19.40
   6   4  -5  408.26   19.80
   6  -4  -5  405.16   20.00
  -6  -4   5  414.66   19.50
   6   4   5  398.06   19.60
  -6   4  -5  368.46   19.50
  -6   4  -5  410.36   19.30
   6   4   5  376.36   19.60
   6  -4  -5  376.06   19.20
   6   4   5  386.16   19.50
  -6   4  -5  381.46   19.30
  -6   4  -5  372.16   19.50
   6  -4  -5  391.56   19.50
   6  -4  -5  367.36   19.30
   6   4   5  403.26   19.30
   6   4   5  393.66   19.30
   6   4   5  386.76   19.50
   7   4  -5  146.19    7.80
   7   4  -5  147.39    7.70
   7   4  -5  141.89    7.70
  -7  -4  -5  136.19    7.50
   7  -4   5  148.69    7.80
  -7   4   5  148.09    7.80
   7   4  -5  137.69    7.90
   7   4  -5  144.39    7.80
   7  -4   5  141.99    8.10
  -7   4   5  147.99    7.90
  -7  -4  -5  134.49    8.00
   7   4  -5  144.79    8.00
  -7  -4  -5  140.29    7.30
   7  -4   5  136.69    7.70
  -7  -4  -5  144.29    7.50
   7  -4  -5  161.08    8.30
  -7  -4   5  143.19    7.50
   7  -4  -5  148.69    7.60
   7   4   5  144.99    7.70
  -7   4  -5  142.49    7.50
  -7   4  -5  143.69    7.50
   7   4   5  142.09    7.90
   7   4   5  138.69    7.60
   7   4   5  147.69    7.80
   7   4   5  151.48    7.60
  -7  -4   5  146.19    7.80
   7  -4  -5  139.09    7.70
   7   4   5  144.09    7.70
  -8   4   5  173.88    8.70
  -8  -4  -5  175.08    8.40
  -8  -4  -5  145.79    8.80
   8   4  -5  162.18    8.60
   8   4  -5  174.18    8.60
  -8  -4  -5  144.89    8.20
   8  -4   5  171.08    8.60
   8   4  -5  137.99    8.60
  -8   4   5  169.08    8.70
   8   4  -5  171.98    8.70
   8  -4   5  168.78    8.60
   8  -4   5  161.78    9.00
   8   4  -5  154.68    8.60
  -8  -4  -5  175.08    8.50
   8   4   5  163.28    8.60
  -8  -4   5  173.78    8.80
   8  -4  -5  173.08    9.00
   8   4   5  163.38    8.50
  -8   4  -5  171.38    8.40
   8  -4  -5  168.08    8.70
   8  -4  -5  170.58    8.50
   8   4   5  173.58    8.80
   8   4   5  178.08    8.70
   8   4   5  139.09    8.30
  -8   4  -5  171.28    8.40
  -8  -4   5  172.58    8.50
   8   4   5  144.79    8.60
   9  -4   5   61.69    3.70
  -9  -4  -5   68.49    3.60
   9   4  -5   60.49    3.70
   9  -4   5   71.89    3.80
  -9   4   5   63.89    3.80
   9   4  -5   65.99    3.80
   9   4  -5   64.39    3.60
  -9  -4  -5   67.79    3.40
  -9   4   5   63.89    3.70
   9   4  -5   53.09    3.70
   9   4  -5   65.89    3.80
  -9  -4  -5   69.59    4.00
   9  -4  -5   61.29    3.60
   9   4   5   67.19    3.80
   9   4   5   63.19    3.80
   9   4   5   68.49    3.90
   9  -4  -5   68.59    4.10
  -9  -4   5   69.19    3.70
   9   4   5   61.59    3.60
  -9   4  -5   62.19    3.50
  -9   4  -5   65.69    3.60
   9  -4  -5   71.29    3.80
  -9  -4   5   67.19    3.50
   0   5  -5  249.88   14.20
   0   5   5  208.68   14.70
   0  -5   5  244.78   14.60
   0  -5  -5  262.37   12.40
   0  -5   5  245.58   15.80
   0   5  -5  247.08   16.70
   0   5   5  241.08   12.50
   0  -5  -5  244.48   17.20
   0   5   5  237.58   15.10
   0   5  -5  266.27   12.70
   0   5  -5  251.57   12.50
   0  -5  -5  222.88   12.10
  -1  -5  -5   90.29    7.20
  -1  -5  -5   86.19    8.70
  -1   5   5   80.79    7.30
   1   5  -5   99.19    5.40
  -1  -5  -5   90.39    4.80
   1   5  -5   80.79    8.30
   1   5  -5   82.69    5.00
  -1  -5  -5   97.39    5.10
   1  -5   5   97.79    4.90
  -1   5   5   90.89    5.20
   1  -5   5   86.69    7.90
   1   5   5   97.19    5.30
  -1   5  -5   94.19    5.40
  -1   5  -5   84.79    8.80
   1  -5  -5   93.39    7.00
  -1   5  -5   95.09    5.30
  -1  -5   5   89.69    7.90
   1  -5  -5   92.19    4.90
  -1  -5   5   84.89    7.00
   1   5   5   78.09    7.20
   1   5   5   82.09    7.50
   1  -5  -5   96.79    5.20
   1  -5  -5   92.19    8.90
  -1   5  -5   87.29    6.80
  -2  -5  -5   10.50    2.70
  -2  -5  -5   15.70    4.30
  -2  -5  -5   17.70    1.60
  -2   5   5   11.90    3.00
   2  -5   5   13.40    3.30
   2  -5   5   16.70    1.50
  -2  -5  -5   18.20    2.90
   2  -5   5   12.90    1.20
  -2   5   5   15.00    1.60
   2   5   5   18.80    3.50
  -2   5  -5   15.10    3.00
  -2  -5   5   15.10    3.40
   2  -5  -5   10.90    3.60
   2   5   5   15.90    1.50
   2  -5  -5   12.30    2.50
  -2   5  -5   12.90    4.00
   2  -5  -5   16.50    1.30
  -2  -5   5   13.10    3.00
  -2   5  -5   14.40    1.50
   2  -5  -5   14.30    1.50
  -2   5  -5   16.80    1.70
   3  -5   5   71.39    4.30
  -3  -5  -5   81.39    4.60
   3  -5   5   83.19    4.20
  -3   5   5   72.49    4.40
   3   5  -5   66.79    4.50
  -3   5   5   70.99    4.20
   3   5  -5   72.19    4.20
  -3   5   5   77.59    4.50
  -3  -5  -5   71.49    4.10
   3   5  -5   75.19    4.60
  -3   5   5   74.09    4.40
  -3  -5  -5   81.19    4.50
   3   5  -5   75.29    4.30
   3   5  -5   69.59    4.30
  -3  -5  -5   76.19    6.70
  -3   5  -5   76.59    4.10
   3   5   5   71.79    4.10
   3   5   5   70.99    4.20
   3   5   5   74.49    4.30
   3   5   5   66.89    6.30
  -3   5  -5   75.09    6.70
   3   5   5   71.29    4.10
  -3  -5   5   60.89    7.10
  -3   5  -5   70.49    4.20
   3  -5  -5   59.09    7.60
   3   5   5   74.29    4.40
  -3  -5   5   71.49    6.90
  -3   5  -5   76.39    4.40
   3  -5  -5   77.89    4.10
  -3   5  -5   71.79    4.10
  -3   5  -5   75.69    4.50
  -3   5  -5   71.69    4.40
   3  -5  -5   77.79    4.40
   3  -5  -5   75.39    3.90
   3   5   5   76.49    4.40
  -3   5  -5   75.29    4.80
  -4   5   5   25.50    2.10
   4   5  -5   26.80    2.30
  -4  -5  -5   26.90    1.90
   4  -5   5   24.90    1.90
   4   5  -5   24.70    2.20
   4   5  -5   23.80    2.10
   4   5  -5   26.30    2.00
   4  -5   5   23.90    2.00
  -4  -5  -5   23.90    2.10
  -4  -5  -5   22.90    1.70
  -4  -5  -5   25.00    2.10
   4  -5   5   31.00    2.30
  -4  -5  -5   27.50    4.40
   4   5  -5   22.30    2.00
  -4   5   5   26.90    2.20
   4   5  -5   23.00    2.00
   4  -5  -5   26.50    1.80
  -4   5  -5   25.30    2.20
  -4   5  -5   24.80    2.00
  -4   5  -5   27.90    2.50
   4   5   5   27.00    2.30
   4   5   5   23.00    1.90
  -4   5  -5   24.00    2.10
  -4   5  -5   22.30    3.60
[truncated: 403,175 more chars]
